# Supplementary material for: Transcriptome Level Reveals the Triterpenoid Saponin Biosynthesis Pathway of Bupleurum falcatum L
Source: Genes (Basel). 2022 Nov 29;13(12):2237. doi: 10.3390/genes13122237 (PMC9777608; doi:10.3390/genes13122237)
Supplement: Supplementary file 1 [file genes-13-02237-s001.zip › Supplemental_tables_Genes.xlsx]

## Sheet: Table. S1
Table S1. Annotion of candidate genes for saikosaponin biosynthesis in B.falcatum
Gene_id	Gene_name	{nr}	{SwissProt}	{KEGG}	{KOG}	{GO}	{nt}	{pfam}
i0_LQ_SD_c13272/f1p2/765	BfAACT2381	{XP_017252340.1; PREDICTED: acetyl-CoA acetyltransferase, cytosolic 1 isoform X1 [Daucus carota subsp. sativus]}	{sp|Q8S4Y1|THIC1_ARATH; Acetyl-CoA acetyltransferase, cytosolic 1 OS=Arabidopsis thaliana OX=3702 GN=AAT1 PE=1 SV=1}	{vvi:100855181; K00626 E2.3.1.9, atoB acetyl-CoA C-acetyltransferase 2.3.1.9 ko01200; Metabolism; Global and overview maps; Carbon metabolism | ko01212; Metabolism; Global and overview maps; Fatty acid metabolism | ko00620; Metabolism; Carbohydrate metabolism; Pyruvate metabolism | ko00630; Metabolism; Carbohydrate metabolism; Glyoxylate and dicarboxylate metabolism | ko00640; Metabolism; Carbohy…	{At5g48230; KOG1390 Acetyl-CoA acetyltransferase I Lipid transport and metabolism ;}	{GO:0008152; NA GO:0016747; transferase activity, transferring acyl groups other than amino-acyl groups; molecular_function}	{XM_017398881.1; PREDICTED: Daucus carota subsp. sativus acetyl-CoA acetyltransferase, cytosolic 1 (LOC108224323), transcript variant X1, mRNA}	{PF02803:Thiolase, C-terminal domain}
i1_HQ_SD_c8948/f4p6/1606	BfAACT11371	{XP_017254370.1; PREDICTED: acetyl-CoA acetyltransferase, cytosolic 1 [Daucus carota subsp. sativus]}	{sp|Q8S4Y1|THIC1_ARATH; Acetyl-CoA acetyltransferase, cytosolic 1 OS=Arabidopsis thaliana OX=3702 GN=AAT1 PE=1 SV=1}	{nnu:104594265; K00626 E2.3.1.9, atoB acetyl-CoA C-acetyltransferase 2.3.1.9 ko01200; Metabolism; Global and overview maps; Carbon metabolism | ko01212; Metabolism; Global and overview maps; Fatty acid metabolism | ko00620; Metabolism; Carbohydrate metabolism; Pyruvate metabolism | ko00630; Metabolism; Carbohydrate metabolism; Glyoxylate and dicarboxylate metabolism | ko00640; Metabolism; Carbohy…	{At5g48230; KOG1390 Acetyl-CoA acetyltransferase I Lipid transport and metabolism ;}	{GO:0016747; transferase activity, transferring acyl groups other than amino-acyl groups; molecular_function GO:0008152; NA}	{XM_017396852.1; PREDICTED: Daucus carota subsp. sativus acetyl-CoA acetyltransferase, cytosolic 1 (LOC108222890), transcript variant X2, mRNA}	{PF00108:Thiolase, N-terminal domain PF02803:Thiolase, C-terminal domain}
i1_HQ_SD_c9960/f2p52/1640	BfAACT11469	{XP_017236767.1; PREDICTED: acetyl-CoA acetyltransferase, cytosolic 1-like [Daucus carota subsp. sativus]}	{sp|Q9FIK7|THIC2_ARATH; Probable acetyl-CoA acetyltransferase, cytosolic 2 OS=Arabidopsis thaliana OX=3702 GN=At5g47720 PE=2 SV=1}	{nnu:104594265; K00626 E2.3.1.9, atoB acetyl-CoA C-acetyltransferase 2.3.1.9 ko01200; Metabolism; Global and overview maps; Carbon metabolism | ko01212; Metabolism; Global and overview maps; Fatty acid metabolism | ko00620; Metabolism; Carbohydrate metabolism; Pyruvate metabolism | ko00630; Metabolism; Carbohydrate metabolism; Glyoxylate and dicarboxylate metabolism | ko00640; Metabolism; Carbohy…	{At5g47720; KOG1390 Acetyl-CoA acetyltransferase I Lipid transport and metabolism ;}	{GO:0004315; 3-oxoacyl-[acyl-carrier-protein] synthase activity; molecular_function GO:0006633; fatty acid biosynthetic process; biological_process GO:0008152; NA GO:0016747; transferase activity, transferring acyl groups other than amino-acyl groups; molecular_function}	{XM_017381278.1; PREDICTED: Daucus carota subsp. sativus acetyl-CoA acetyltransferase, cytosolic 1-like (LOC108210032), mRNA}	{PF08545:3-Oxoacyl-[acyl-carrier-protein (ACP)] synthase III PF00108:Thiolase, N-terminal domain PF02803:Thiolase, C-terminal domain}
i1_LQ_SD_c18291/f1p1/1717	BfAACT13570	{XP_017254370.1; PREDICTED: acetyl-CoA acetyltransferase, cytosolic 1 [Daucus carota subsp. sativus]}	{sp|Q8S4Y1|THIC1_ARATH; Acetyl-CoA acetyltransferase, cytosolic 1 OS=Arabidopsis thaliana OX=3702 GN=AAT1 PE=1 SV=1}	{nnu:104594265; K00626 E2.3.1.9, atoB acetyl-CoA C-acetyltransferase 2.3.1.9 ko01200; Metabolism; Global and overview maps; Carbon metabolism | ko01212; Metabolism; Global and overview maps; Fatty acid metabolism | ko00620; Metabolism; Carbohydrate metabolism; Pyruvate metabolism | ko00630; Metabolism; Carbohydrate metabolism; Glyoxylate and dicarboxylate metabolism | ko00640; Metabolism; Carbohy…	{At5g48230; KOG1390 Acetyl-CoA acetyltransferase I Lipid transport and metabolism ;}	{GO:0008152; NA GO:0016747; transferase activity, transferring acyl groups other than amino-acyl groups; molecular_function}	{XM_017398881.1; PREDICTED: Daucus carota subsp. sativus acetyl-CoA acetyltransferase, cytosolic 1 (LOC108224323), transcript variant X1, mRNA}	{PF02803:Thiolase, C-terminal domain PF00108:Thiolase, N-terminal domain}
i1_LQ_SD_c20626/f1p3/1742	BfAACT14501	{XP_017254370.1; PREDICTED: acetyl-CoA acetyltransferase, cytosolic 1 [Daucus carota subsp. sativus]}	{sp|Q8S4Y1|THIC1_ARATH; Acetyl-CoA acetyltransferase, cytosolic 1 OS=Arabidopsis thaliana OX=3702 GN=AAT1 PE=1 SV=1}	{nnu:104594265; K00626 E2.3.1.9, atoB acetyl-CoA C-acetyltransferase 2.3.1.9 ko01200; Metabolism; Global and overview maps; Carbon metabolism | ko01212; Metabolism; Global and overview maps; Fatty acid metabolism | ko00620; Metabolism; Carbohydrate metabolism; Pyruvate metabolism | ko00630; Metabolism; Carbohydrate metabolism; Glyoxylate and dicarboxylate metabolism | ko00640; Metabolism; Carbohy…	{At5g48230; KOG1390 Acetyl-CoA acetyltransferase I Lipid transport and metabolism ;}	{GO:0008152; NA GO:0016747; transferase activity, transferring acyl groups other than amino-acyl groups; molecular_function}	{XM_017396852.1; PREDICTED: Daucus carota subsp. sativus acetyl-CoA acetyltransferase, cytosolic 1 (LOC108222890), transcript variant X2, mRNA}	{PF02803:Thiolase, C-terminal domain PF00108:Thiolase, N-terminal domain}
i1_LQ_SD_c25320/f1p0/1686	BfAACT16280	{XP_017236767.1; PREDICTED: acetyl-CoA acetyltransferase, cytosolic 1-like [Daucus carota subsp. sativus]}	{sp|Q9FIK7|THIC2_ARATH; Probable acetyl-CoA acetyltransferase, cytosolic 2 OS=Arabidopsis thaliana OX=3702 GN=At5g47720 PE=2 SV=1}	{nnu:104594265; K00626 E2.3.1.9, atoB acetyl-CoA C-acetyltransferase 2.3.1.9 ko01200; Metabolism; Global and overview maps; Carbon metabolism | ko01212; Metabolism; Global and overview maps; Fatty acid metabolism | ko00620; Metabolism; Carbohydrate metabolism; Pyruvate metabolism | ko00630; Metabolism; Carbohydrate metabolism; Glyoxylate and dicarboxylate metabolism | ko00640; Metabolism; Carbohy…	{At5g47720; KOG1390 Acetyl-CoA acetyltransferase I Lipid transport and metabolism ;}	{GO:0016747; transferase activity, transferring acyl groups other than amino-acyl groups; molecular_function GO:0008152; NA}	{XM_017381278.1; PREDICTED: Daucus carota subsp. sativus acetyl-CoA acetyltransferase, cytosolic 1-like (LOC108210032), mRNA}	{PF02803:Thiolase, C-terminal domain PF00108:Thiolase, N-terminal domain}
i1_LQ_SD_c26159/f1p1/1829	BfAACT16597	{XP_017236767.1; PREDICTED: acetyl-CoA acetyltransferase, cytosolic 1-like [Daucus carota subsp. sativus]}	{sp|Q8S4Y1|THIC1_ARATH; Acetyl-CoA acetyltransferase, cytosolic 1 OS=Arabidopsis thaliana OX=3702 GN=AAT1 PE=1 SV=1}	{nnu:104594265; K00626 E2.3.1.9, atoB acetyl-CoA C-acetyltransferase 2.3.1.9 ko01200; Metabolism; Global and overview maps; Carbon metabolism | ko01212; Metabolism; Global and overview maps; Fatty acid metabolism | ko00620; Metabolism; Carbohydrate metabolism; Pyruvate metabolism | ko00630; Metabolism; Carbohydrate metabolism; Glyoxylate and dicarboxylate metabolism | ko00640; Metabolism; Carbohy…	{At5g48230; KOG1390 Acetyl-CoA acetyltransferase I Lipid transport and metabolism ;}	{GO:0008152; NA GO:0016747; transferase activity, transferring acyl groups other than amino-acyl groups; molecular_function}	{XM_017381278.1; PREDICTED: Daucus carota subsp. sativus acetyl-CoA acetyltransferase, cytosolic 1-like (LOC108210032), mRNA}	{PF00108:Thiolase, N-terminal domain}
i1_LQ_SD_c34599/f1p5/1857	BfAACT18772	{XP_017254370.1; PREDICTED: acetyl-CoA acetyltransferase, cytosolic 1 [Daucus carota subsp. sativus]}	{sp|Q8S4Y1|THIC1_ARATH; Acetyl-CoA acetyltransferase, cytosolic 1 OS=Arabidopsis thaliana OX=3702 GN=AAT1 PE=1 SV=1}	{nnu:104594265; K00626 E2.3.1.9, atoB acetyl-CoA C-acetyltransferase 2.3.1.9 ko01200; Metabolism; Global and overview maps; Carbon metabolism | ko01212; Metabolism; Global and overview maps; Fatty acid metabolism | ko00620; Metabolism; Carbohydrate metabolism; Pyruvate metabolism | ko00630; Metabolism; Carbohydrate metabolism; Glyoxylate and dicarboxylate metabolism | ko00640; Metabolism; Carbohy…	{At5g48230; KOG1390 Acetyl-CoA acetyltransferase I Lipid transport and metabolism ;}	{GO:0016747; transferase activity, transferring acyl groups other than amino-acyl groups; molecular_function GO:0008152; NA}	{XM_017396852.1; PREDICTED: Daucus carota subsp. sativus acetyl-CoA acetyltransferase, cytosolic 1 (LOC108222890), transcript variant X2, mRNA}	{PF02803:Thiolase, C-terminal domain PF00108:Thiolase, N-terminal domain}
i1_LQ_SD_c37967/f1p0/1779	BfAACT20206	{XP_017254370.1; PREDICTED: acetyl-CoA acetyltransferase, cytosolic 1 [Daucus carota subsp. sativus]}	{sp|Q8S4Y1|THIC1_ARATH; Acetyl-CoA acetyltransferase, cytosolic 1 OS=Arabidopsis thaliana OX=3702 GN=AAT1 PE=1 SV=1}	{nnu:104594265; K00626 E2.3.1.9, atoB acetyl-CoA C-acetyltransferase 2.3.1.9 ko01200; Metabolism; Global and overview maps; Carbon metabolism | ko01212; Metabolism; Global and overview maps; Fatty acid metabolism | ko00620; Metabolism; Carbohydrate metabolism; Pyruvate metabolism | ko00630; Metabolism; Carbohydrate metabolism; Glyoxylate and dicarboxylate metabolism | ko00640; Metabolism; Carbohy…	{At5g48230; KOG1390 Acetyl-CoA acetyltransferase I Lipid transport and metabolism ;}	{GO:0016747; transferase activity, transferring acyl groups other than amino-acyl groups; molecular_function GO:0008152; NA}	{XM_017398881.1; PREDICTED: Daucus carota subsp. sativus acetyl-CoA acetyltransferase, cytosolic 1 (LOC108224323), transcript variant X1, mRNA}	{PF00108:Thiolase, N-terminal domain PF02803:Thiolase, C-terminal domain}
i1_LQ_SD_c38635/f1p5/1680	BfAACT20492	{XP_017236767.1; PREDICTED: acetyl-CoA acetyltransferase, cytosolic 1-like [Daucus carota subsp. sativus]}	{sp|Q9FIK7|THIC2_ARATH; Probable acetyl-CoA acetyltransferase, cytosolic 2 OS=Arabidopsis thaliana OX=3702 GN=At5g47720 PE=2 SV=1}	{nnu:104594265; K00626 E2.3.1.9, atoB acetyl-CoA C-acetyltransferase 2.3.1.9 ko01200; Metabolism; Global and overview maps; Carbon metabolism | ko01212; Metabolism; Global and overview maps; Fatty acid metabolism | ko00620; Metabolism; Carbohydrate metabolism; Pyruvate metabolism | ko00630; Metabolism; Carbohydrate metabolism; Glyoxylate and dicarboxylate metabolism | ko00640; Metabolism; Carbohy…	{At5g47720; KOG1390 Acetyl-CoA acetyltransferase I Lipid transport and metabolism ;}	{GO:0008152; NA GO:0006633; fatty acid biosynthetic process; biological_process GO:0004315; 3-oxoacyl-[acyl-carrier-protein] synthase activity; molecular_function GO:0016747; transferase activity, transferring acyl groups other than amino-acyl groups; molecular_function}	{XM_017381278.1; PREDICTED: Daucus carota subsp. sativus acetyl-CoA acetyltransferase, cytosolic 1-like (LOC108210032), mRNA}	{PF00108:Thiolase, N-terminal domain PF02803:Thiolase, C-terminal domain PF08545:3-Oxoacyl-[acyl-carrier-protein (ACP)] synthase III}
i1_LQ_SD_c41285/f1p6/1756	BfAACT21654	{XP_017252340.1; PREDICTED: acetyl-CoA acetyltransferase, cytosolic 1 isoform X1 [Daucus carota subsp. sativus]}	{sp|Q8S4Y1|THIC1_ARATH; Acetyl-CoA acetyltransferase, cytosolic 1 OS=Arabidopsis thaliana OX=3702 GN=AAT1 PE=1 SV=1}	{nnu:104594265; K00626 E2.3.1.9, atoB acetyl-CoA C-acetyltransferase 2.3.1.9 ko01200; Metabolism; Global and overview maps; Carbon metabolism | ko01212; Metabolism; Global and overview maps; Fatty acid metabolism | ko00620; Metabolism; Carbohydrate metabolism; Pyruvate metabolism | ko00630; Metabolism; Carbohydrate metabolism; Glyoxylate and dicarboxylate metabolism | ko00640; Metabolism; Carbohy…	{At5g48230; KOG1390 Acetyl-CoA acetyltransferase I Lipid transport and metabolism ;}	{GO:0016747; transferase activity, transferring acyl groups other than amino-acyl groups; molecular_function GO:0008152; NA}	{XM_017398882.1; PREDICTED: Daucus carota subsp. sativus acetyl-CoA acetyltransferase, cytosolic 1 (LOC108224323), transcript variant X2, mRNA}	{PF02803:Thiolase, C-terminal domain PF00108:Thiolase, N-terminal domain}
i1_LQ_SD_c51846/f1p93/1775	BfAACT24286	{XP_017236767.1; PREDICTED: acetyl-CoA acetyltransferase, cytosolic 1-like [Daucus carota subsp. sativus]}	{sp|Q9FIK7|THIC2_ARATH; Probable acetyl-CoA acetyltransferase, cytosolic 2 OS=Arabidopsis thaliana OX=3702 GN=At5g47720 PE=2 SV=1}	{nnu:104594265; K00626 E2.3.1.9, atoB acetyl-CoA C-acetyltransferase 2.3.1.9 ko01200; Metabolism; Global and overview maps; Carbon metabolism | ko01212; Metabolism; Global and overview maps; Fatty acid metabolism | ko00620; Metabolism; Carbohydrate metabolism; Pyruvate metabolism | ko00630; Metabolism; Carbohydrate metabolism; Glyoxylate and dicarboxylate metabolism | ko00640; Metabolism; Carbohy…	{At5g47720; KOG1390 Acetyl-CoA acetyltransferase I Lipid transport and metabolism ;}	{GO:0008152; NA GO:0006633; fatty acid biosynthetic process; biological_process GO:0004315; 3-oxoacyl-[acyl-carrier-protein] synthase activity; molecular_function GO:0016747; transferase activity, transferring acyl groups other than amino-acyl groups; molecular_function}	{XM_017381278.1; PREDICTED: Daucus carota subsp. sativus acetyl-CoA acetyltransferase, cytosolic 1-like (LOC108210032), mRNA}	{PF08545:3-Oxoacyl-[acyl-carrier-protein (ACP)] synthase III PF02803:Thiolase, C-terminal domain PF00108:Thiolase, N-terminal domain}
i1_LQ_SD_c53486/f1p0/1338	BfAACT25027	{JAT48616.1; Acetyl-CoA acetyltransferase, partial [Anthurium amnicola]}	{sp|Q9UQW6|THIL_SCHPO; Acetyl-CoA acetyltransferase OS=Schizosaccharomyces pombe (strain 972 / ATCC 24843) OX=284812 GN=erg10 PE=2 SV=1}	{pvu:PHAVU_008G288400g; K00626 E2.3.1.9, atoB acetyl-CoA C-acetyltransferase 2.3.1.9 ko01200; Metabolism; Global and overview maps; Carbon metabolism | ko01212; Metabolism; Global and overview maps; Fatty acid metabolism | ko00620; Metabolism; Carbohydrate metabolism; Pyruvate metabolism | ko00630; Metabolism; Carbohydrate metabolism; Glyoxylate and dicarboxylate metabolism | ko00640; Metabolism;…	{SPBC215.09c; KOG1390 Acetyl-CoA acetyltransferase I Lipid transport and metabolism ;}	{GO:0006633; fatty acid biosynthetic process; biological_process GO:0008152; NA GO:0004315; 3-oxoacyl-[acyl-carrier-protein] synthase activity; molecular_function GO:0016747; transferase activity, transferring acyl groups other than amino-acyl groups; molecular_function}	{NA}	{PF00108:Thiolase, N-terminal domain PF02803:Thiolase, C-terminal domain PF08545:3-Oxoacyl-[acyl-carrier-protein (ACP)] synthase III}
i1_LQ_SD_c54369/f1p0/1545	BfAACT25406	{XP_017252340.1; PREDICTED: acetyl-CoA acetyltransferase, cytosolic 1 isoform X1 [Daucus carota subsp. sativus]}	{sp|Q8S4Y1|THIC1_ARATH; Acetyl-CoA acetyltransferase, cytosolic 1 OS=Arabidopsis thaliana OX=3702 GN=AAT1 PE=1 SV=1}	{cit:102612024; K00626 E2.3.1.9, atoB acetyl-CoA C-acetyltransferase 2.3.1.9 ko01200; Metabolism; Global and overview maps; Carbon metabolism | ko01212; Metabolism; Global and overview maps; Fatty acid metabolism | ko00620; Metabolism; Carbohydrate metabolism; Pyruvate metabolism | ko00630; Metabolism; Carbohydrate metabolism; Glyoxylate and dicarboxylate metabolism | ko00640; Metabolism; Carbohy…	{At5g48230; KOG1390 Acetyl-CoA acetyltransferase I Lipid transport and metabolism ;}	{GO:0016747; transferase activity, transferring acyl groups other than amino-acyl groups; molecular_function GO:0008152; NA}	{XM_017396852.1; PREDICTED: Daucus carota subsp. sativus acetyl-CoA acetyltransferase, cytosolic 1 (LOC108222890), transcript variant X2, mRNA}	{PF00108:Thiolase, N-terminal domain}
i1_LQ_SD_c54832/f1p0/1642	BfAACT25616	{XP_017236767.1; PREDICTED: acetyl-CoA acetyltransferase, cytosolic 1-like [Daucus carota subsp. sativus]}	{sp|Q9FIK7|THIC2_ARATH; Probable acetyl-CoA acetyltransferase, cytosolic 2 OS=Arabidopsis thaliana OX=3702 GN=At5g47720 PE=2 SV=1}	{nnu:104594265; K00626 E2.3.1.9, atoB acetyl-CoA C-acetyltransferase 2.3.1.9 ko01200; Metabolism; Global and overview maps; Carbon metabolism | ko01212; Metabolism; Global and overview maps; Fatty acid metabolism | ko00620; Metabolism; Carbohydrate metabolism; Pyruvate metabolism | ko00630; Metabolism; Carbohydrate metabolism; Glyoxylate and dicarboxylate metabolism | ko00640; Metabolism; Carbohy…	{At5g47720; KOG1390 Acetyl-CoA acetyltransferase I Lipid transport and metabolism ;}	{GO:0008152; NA GO:0016747; transferase activity, transferring acyl groups other than amino-acyl groups; molecular_function}	{XM_017381278.1; PREDICTED: Daucus carota subsp. sativus acetyl-CoA acetyltransferase, cytosolic 1-like (LOC108210032), mRNA}	{PF00108:Thiolase, N-terminal domain}
i1_LQ_SD_c65254/f1p1/1565	BfAACT27860	{XP_017254370.1; PREDICTED: acetyl-CoA acetyltransferase, cytosolic 1 [Daucus carota subsp. sativus]}	{sp|Q8S4Y1|THIC1_ARATH; Acetyl-CoA acetyltransferase, cytosolic 1 OS=Arabidopsis thaliana OX=3702 GN=AAT1 PE=1 SV=1}	{nnu:104594265; K00626 E2.3.1.9, atoB acetyl-CoA C-acetyltransferase 2.3.1.9 ko01200; Metabolism; Global and overview maps; Carbon metabolism | ko01212; Metabolism; Global and overview maps; Fatty acid metabolism | ko00620; Metabolism; Carbohydrate metabolism; Pyruvate metabolism | ko00630; Metabolism; Carbohydrate metabolism; Glyoxylate and dicarboxylate metabolism | ko00640; Metabolism; Carbohy…	{At5g48230; KOG1390 Acetyl-CoA acetyltransferase I Lipid transport and metabolism ;}	{GO:0016747; transferase activity, transferring acyl groups other than amino-acyl groups; molecular_function GO:0008152; NA}	{XM_017398882.1; PREDICTED: Daucus carota subsp. sativus acetyl-CoA acetyltransferase, cytosolic 1 (LOC108224323), transcript variant X2, mRNA}	{PF02803:Thiolase, C-terminal domain PF00108:Thiolase, N-terminal domain}
i2_HQ_SD_c5595/f2p2/2790	BfAACT33676	{XP_017252340.1; PREDICTED: acetyl-CoA acetyltransferase, cytosolic 1 isoform X1 [Daucus carota subsp. sativus]}	{sp|Q8S4Y1|THIC1_ARATH; Acetyl-CoA acetyltransferase, cytosolic 1 OS=Arabidopsis thaliana OX=3702 GN=AAT1 PE=1 SV=1}	{nnu:104594265; K00626 E2.3.1.9, atoB acetyl-CoA C-acetyltransferase 2.3.1.9 ko01200; Metabolism; Global and overview maps; Carbon metabolism | ko01212; Metabolism; Global and overview maps; Fatty acid metabolism | ko00620; Metabolism; Carbohydrate metabolism; Pyruvate metabolism | ko00630; Metabolism; Carbohydrate metabolism; Glyoxylate and dicarboxylate metabolism | ko00640; Metabolism; Carbohy…	{At5g48230; KOG1390 Acetyl-CoA acetyltransferase I Lipid transport and metabolism ;}	{GO:0016747; transferase activity, transferring acyl groups other than amino-acyl groups; molecular_function GO:0008152; NA}	{XM_017398881.1; PREDICTED: Daucus carota subsp. sativus acetyl-CoA acetyltransferase, cytosolic 1 (LOC108224323), transcript variant X1, mRNA}	{PF00108:Thiolase, N-terminal domain PF02803:Thiolase, C-terminal domain}
i2_LQ_SD_c14213/f1p3/1877	BfAACT40194	{XP_017236767.1; PREDICTED: acetyl-CoA acetyltransferase, cytosolic 1-like [Daucus carota subsp. sativus]}	{sp|Q9FIK7|THIC2_ARATH; Probable acetyl-CoA acetyltransferase, cytosolic 2 OS=Arabidopsis thaliana OX=3702 GN=At5g47720 PE=2 SV=1}	{nnu:104594265; K00626 E2.3.1.9, atoB acetyl-CoA C-acetyltransferase 2.3.1.9 ko01200; Metabolism; Global and overview maps; Carbon metabolism | ko01212; Metabolism; Global and overview maps; Fatty acid metabolism | ko00620; Metabolism; Carbohydrate metabolism; Pyruvate metabolism | ko00630; Metabolism; Carbohydrate metabolism; Glyoxylate and dicarboxylate metabolism | ko00640; Metabolism; Carbohy…	{At5g47720; KOG1390 Acetyl-CoA acetyltransferase I Lipid transport and metabolism ;}	{GO:0016747; transferase activity, transferring acyl groups other than amino-acyl groups; molecular_function GO:0004315; 3-oxoacyl-[acyl-carrier-protein] synthase activity; molecular_function GO:0006633; fatty acid biosynthetic process; biological_process GO:0008152; NA}	{XM_017381278.1; PREDICTED: Daucus carota subsp. sativus acetyl-CoA acetyltransferase, cytosolic 1-like (LOC108210032), mRNA}	{PF02803:Thiolase, C-terminal domain PF00108:Thiolase, N-terminal domain PF08545:3-Oxoacyl-[acyl-carrier-protein (ACP)] synthase III}
i2_LQ_SD_c22455/f1p3/2339	BfAACT42306	{XP_017236767.1; PREDICTED: acetyl-CoA acetyltransferase, cytosolic 1-like [Daucus carota subsp. sativus]}	{sp|Q9FIK7|THIC2_ARATH; Probable acetyl-CoA acetyltransferase, cytosolic 2 OS=Arabidopsis thaliana OX=3702 GN=At5g47720 PE=2 SV=1}	{pvu:PHAVU_008G288400g; K00626 E2.3.1.9, atoB acetyl-CoA C-acetyltransferase 2.3.1.9 ko01200; Metabolism; Global and overview maps; Carbon metabolism | ko01212; Metabolism; Global and overview maps; Fatty acid metabolism | ko00620; Metabolism; Carbohydrate metabolism; Pyruvate metabolism | ko00630; Metabolism; Carbohydrate metabolism; Glyoxylate and dicarboxylate metabolism | ko00640; Metabolism;…	{At5g47720; KOG1390 Acetyl-CoA acetyltransferase I Lipid transport and metabolism ;}	{GO:0016747; transferase activity, transferring acyl groups other than amino-acyl groups; molecular_function GO:0008152; NA}	{XM_017381278.1; PREDICTED: Daucus carota subsp. sativus acetyl-CoA acetyltransferase, cytosolic 1-like (LOC108210032), mRNA}	{PF00108:Thiolase, N-terminal domain PF02803:Thiolase, C-terminal domain}
i2_LQ_SD_c35525/f1p3/2322	BfAACT46122	{XP_017252340.1; PREDICTED: acetyl-CoA acetyltransferase, cytosolic 1 isoform X1 [Daucus carota subsp. sativus]}	{sp|Q8S4Y1|THIC1_ARATH; Acetyl-CoA acetyltransferase, cytosolic 1 OS=Arabidopsis thaliana OX=3702 GN=AAT1 PE=1 SV=1}	{crb:CARUB_v10026521mg; K00626 E2.3.1.9, atoB acetyl-CoA C-acetyltransferase 2.3.1.9 ko01200; Metabolism; Global and overview maps; Carbon metabolism | ko01212; Metabolism; Global and overview maps; Fatty acid metabolism | ko00620; Metabolism; Carbohydrate metabolism; Pyruvate metabolism | ko00630; Metabolism; Carbohydrate metabolism; Glyoxylate and dicarboxylate metabolism | ko00640; Metabolism;…	{At5g48230; KOG1390 Acetyl-CoA acetyltransferase I Lipid transport and metabolism ;}	{GO:0016747; transferase activity, transferring acyl groups other than amino-acyl groups; molecular_function GO:0008152; NA}	{XM_017396852.1; PREDICTED: Daucus carota subsp. sativus acetyl-CoA acetyltransferase, cytosolic 1 (LOC108222890), transcript variant X2, mRNA}	{PF00108:Thiolase, N-terminal domain}
i2_LQ_SD_c64527/f1p2/2063	BfAACT55052	{XP_017254370.1; PREDICTED: acetyl-CoA acetyltransferase, cytosolic 1 [Daucus carota subsp. sativus]}	{sp|Q8S4Y1|THIC1_ARATH; Acetyl-CoA acetyltransferase, cytosolic 1 OS=Arabidopsis thaliana OX=3702 GN=AAT1 PE=1 SV=1}	{nnu:104594265; K00626 E2.3.1.9, atoB acetyl-CoA C-acetyltransferase 2.3.1.9 ko01200; Metabolism; Global and overview maps; Carbon metabolism | ko01212; Metabolism; Global and overview maps; Fatty acid metabolism | ko00620; Metabolism; Carbohydrate metabolism; Pyruvate metabolism | ko00630; Metabolism; Carbohydrate metabolism; Glyoxylate and dicarboxylate metabolism | ko00640; Metabolism; Carbohy…	{At5g48230; KOG1390 Acetyl-CoA acetyltransferase I Lipid transport and metabolism ;}	{GO:0016747; transferase activity, transferring acyl groups other than amino-acyl groups; molecular_function GO:0008152; NA}	{XM_017398882.1; PREDICTED: Daucus carota subsp. sativus acetyl-CoA acetyltransferase, cytosolic 1 (LOC108224323), transcript variant X2, mRNA}	{PF00108:Thiolase, N-terminal domain}
i2_LQ_SD_c88569/f1p2/2591	BfAACT60754	{XP_017252340.1; PREDICTED: acetyl-CoA acetyltransferase, cytosolic 1 isoform X1 [Daucus carota subsp. sativus]}	{sp|Q8S4Y1|THIC1_ARATH; Acetyl-CoA acetyltransferase, cytosolic 1 OS=Arabidopsis thaliana OX=3702 GN=AAT1 PE=1 SV=1}	{nnu:104594265; K00626 E2.3.1.9, atoB acetyl-CoA C-acetyltransferase 2.3.1.9 ko01200; Metabolism; Global and overview maps; Carbon metabolism | ko01212; Metabolism; Global and overview maps; Fatty acid metabolism | ko00620; Metabolism; Carbohydrate metabolism; Pyruvate metabolism | ko00630; Metabolism; Carbohydrate metabolism; Glyoxylate and dicarboxylate metabolism | ko00640; Metabolism; Carbohy…	{At5g48230; KOG1390 Acetyl-CoA acetyltransferase I Lipid transport and metabolism ;}	{GO:0008152; NA GO:0016747; transferase activity, transferring acyl groups other than amino-acyl groups; molecular_function}	{XM_017398881.1; PREDICTED: Daucus carota subsp. sativus acetyl-CoA acetyltransferase, cytosolic 1 (LOC108224323), transcript variant X1, mRNA}	{PF02803:Thiolase, C-terminal domain PF00108:Thiolase, N-terminal domain}
i2_LQ_SD_c93805/f1p2/2488	BfAACT63017	{XP_017252340.1; PREDICTED: acetyl-CoA acetyltransferase, cytosolic 1 isoform X1 [Daucus carota subsp. sativus]}	{sp|Q8S4Y1|THIC1_ARATH; Acetyl-CoA acetyltransferase, cytosolic 1 OS=Arabidopsis thaliana OX=3702 GN=AAT1 PE=1 SV=1}	{nnu:104594265; K00626 E2.3.1.9, atoB acetyl-CoA C-acetyltransferase 2.3.1.9 ko01200; Metabolism; Global and overview maps; Carbon metabolism | ko01212; Metabolism; Global and overview maps; Fatty acid metabolism | ko00620; Metabolism; Carbohydrate metabolism; Pyruvate metabolism | ko00630; Metabolism; Carbohydrate metabolism; Glyoxylate and dicarboxylate metabolism | ko00640; Metabolism; Carbohy…	{At5g48230; KOG1390 Acetyl-CoA acetyltransferase I Lipid transport and metabolism ;}	{GO:0016747; transferase activity, transferring acyl groups other than amino-acyl groups; molecular_function GO:0008152; NA}	{XM_017398881.1; PREDICTED: Daucus carota subsp. sativus acetyl-CoA acetyltransferase, cytosolic 1 (LOC108224323), transcript variant X1, mRNA}	{PF02803:Thiolase, C-terminal domain PF00108:Thiolase, N-terminal domain}
i4_LQ_SD_c80655/f1p0/4974	BfAACT105328	{KZM96432.1; hypothetical protein DCAR_019674 [Daucus carota subsp. sativus]}	{sp|Q8S4Y1|THIC1_ARATH; Acetyl-CoA acetyltransferase, cytosolic 1 OS=Arabidopsis thaliana OX=3702 GN=AAT1 PE=1 SV=1}	{vvi:100855181; K00626 E2.3.1.9, atoB acetyl-CoA C-acetyltransferase 2.3.1.9 ko01200; Metabolism; Global and overview maps; Carbon metabolism | ko01212; Metabolism; Global and overview maps; Fatty acid metabolism | ko00620; Metabolism; Carbohydrate metabolism; Pyruvate metabolism | ko00630; Metabolism; Carbohydrate metabolism; Glyoxylate and dicarboxylate metabolism | ko00640; Metabolism; Carbohy…	{At5g48230; KOG1390 Acetyl-CoA acetyltransferase I Lipid transport and metabolism ;}	{GO:0016747; transferase activity, transferring acyl groups other than amino-acyl groups; molecular_function GO:0008152; NA}	{XM_017396852.1; PREDICTED: Daucus carota subsp. sativus acetyl-CoA acetyltransferase, cytosolic 1 (LOC108222890), transcript variant X2, mRNA}	{PF00108:Thiolase, N-terminal domain}
i1_HQ_SD_c20039/f2p3/1786	BfAACT8197	{XP_017223112.1; PREDICTED: 3-ketoacyl-CoA thiolase 2, peroxisomal [Daucus carota subsp. sativus]}	{sp|Q56WD9|THIK2_ARATH; 3-ketoacyl-CoA thiolase 2, peroxisomal OS=Arabidopsis thaliana OX=3702 GN=PED1 PE=1 SV=2}	{sind:105158640; K07513 ACAA1 acetyl-CoA acyltransferase 1 2.3.1.16 ko01212; Metabolism; Global and overview maps; Fatty acid metabolism | ko00071; Metabolism; Lipid metabolism; Fatty acid degradation | ko00592; Metabolism; Lipid metabolism; alpha-Linolenic acid metabolism | ko01040; Metabolism; Lipid metabolism; Biosynthesis of unsaturated fatty acids | ko00280; Metabolism; Amino acid metabolism…	{At2g33150; KOG1389 3-oxoacyl CoA thiolase I Lipid transport and metabolism ;}	{GO:0016747; transferase activity, transferring acyl groups other than amino-acyl groups; molecular_function GO:0008152; NA}	{XM_017367623.1; PREDICTED: Daucus carota subsp. sativus 3-ketoacyl-CoA thiolase 2, peroxisomal (LOC108199687), mRNA}	{PF00108:Thiolase, N-terminal domain}
i1_HQ_SD_c27040/f2p3/1626	BfAACT8844	{XP_017223112.1; PREDICTED: 3-ketoacyl-CoA thiolase 2, peroxisomal [Daucus carota subsp. sativus]}	{sp|Q56WD9|THIK2_ARATH; 3-ketoacyl-CoA thiolase 2, peroxisomal OS=Arabidopsis thaliana OX=3702 GN=PED1 PE=1 SV=2}	{sind:105158640; K07513 ACAA1 acetyl-CoA acyltransferase 1 2.3.1.16 ko01212; Metabolism; Global and overview maps; Fatty acid metabolism | ko00071; Metabolism; Lipid metabolism; Fatty acid degradation | ko00592; Metabolism; Lipid metabolism; alpha-Linolenic acid metabolism | ko01040; Metabolism; Lipid metabolism; Biosynthesis of unsaturated fatty acids | ko00280; Metabolism; Amino acid metabolism…	{At2g33150; KOG1389 3-oxoacyl CoA thiolase I Lipid transport and metabolism ;}	{GO:0008152; NA GO:0016747; transferase activity, transferring acyl groups other than amino-acyl groups; molecular_function}	{XM_017367623.1; PREDICTED: Daucus carota subsp. sativus 3-ketoacyl-CoA thiolase 2, peroxisomal (LOC108199687), mRNA}	{PF00108:Thiolase, N-terminal domain PF02803:Thiolase, C-terminal domain}
i1_HQ_SD_c41666/f3p0/1670	BfAACT9597	{XP_017230692.1; PREDICTED: 3-ketoacyl-CoA thiolase 2, peroxisomal-like [Daucus carota subsp. sativus]}	{sp|Q56WD9|THIK2_ARATH; 3-ketoacyl-CoA thiolase 2, peroxisomal OS=Arabidopsis thaliana OX=3702 GN=PED1 PE=1 SV=2}	{pper:PRUPE_ppa005303mg; K07513 ACAA1 acetyl-CoA acyltransferase 1 2.3.1.16 ko01212; Metabolism; Global and overview maps; Fatty acid metabolism | ko00071; Metabolism; Lipid metabolism; Fatty acid degradation | ko00592; Metabolism; Lipid metabolism; alpha-Linolenic acid metabolism | ko01040; Metabolism; Lipid metabolism; Biosynthesis of unsaturated fatty acids | ko00280; Metabolism; Amino acid me…	{At2g33150; KOG1389 3-oxoacyl CoA thiolase I Lipid transport and metabolism ;}	{GO:0016747; transferase activity, transferring acyl groups other than amino-acyl groups; molecular_function GO:0008152; NA}	{XM_017375203.1; PREDICTED: Daucus carota subsp. sativus 3-ketoacyl-CoA thiolase 2, peroxisomal-like (LOC108205300), mRNA}	{PF02803:Thiolase, C-terminal domain PF00108:Thiolase, N-terminal domain}
i1_HQ_SD_c42171/f2p1/1968	BfAACT9620	{XP_017223112.1; PREDICTED: 3-ketoacyl-CoA thiolase 2, peroxisomal [Daucus carota subsp. sativus]}	{sp|Q56WD9|THIK2_ARATH; 3-ketoacyl-CoA thiolase 2, peroxisomal OS=Arabidopsis thaliana OX=3702 GN=PED1 PE=1 SV=2}	{sind:105158640; K07513 ACAA1 acetyl-CoA acyltransferase 1 2.3.1.16 ko01212; Metabolism; Global and overview maps; Fatty acid metabolism | ko00071; Metabolism; Lipid metabolism; Fatty acid degradation | ko00592; Metabolism; Lipid metabolism; alpha-Linolenic acid metabolism | ko01040; Metabolism; Lipid metabolism; Biosynthesis of unsaturated fatty acids | ko00280; Metabolism; Amino acid metabolism…	{At2g33150; KOG1389 3-oxoacyl CoA thiolase I Lipid transport and metabolism ;}	{GO:0008152; NA GO:0016747; transferase activity, transferring acyl groups other than amino-acyl groups; molecular_function}	{XM_017367623.1; PREDICTED: Daucus carota subsp. sativus 3-ketoacyl-CoA thiolase 2, peroxisomal (LOC108199687), mRNA}	{PF00108:Thiolase, N-terminal domain PF02803:Thiolase, C-terminal domain}
i1_HQ_SD_c5929/f2p0/1392	BfAACT10333	{JAT46694.1; 3-ketoacyl-CoA thiolase B, peroxisomal [Anthurium amnicola]}	{sp|Q05493|THIK_YARLI; 3-ketoacyl-CoA thiolase, peroxisomal OS=Yarrowia lipolytica (strain CLIB 122 / E 150) OX=284591 GN=POT1 PE=3 SV=1}	{cic:CICLE_v10004931mg; K07513 ACAA1 acetyl-CoA acyltransferase 1 2.3.1.16 ko01212; Metabolism; Global and overview maps; Fatty acid metabolism | ko00071; Metabolism; Lipid metabolism; Fatty acid degradation | ko00592; Metabolism; Lipid metabolism; alpha-Linolenic acid metabolism | ko01040; Metabolism; Lipid metabolism; Biosynthesis of unsaturated fatty acids | ko00280; Metabolism; Amino acid met…	{At2g33150; KOG1389 3-oxoacyl CoA thiolase I Lipid transport and metabolism ;}	{GO:0016747; transferase activity, transferring acyl groups other than amino-acyl groups; molecular_function GO:0008152; NA}	{NA}	{PF00108:Thiolase, N-terminal domain PF02803:Thiolase, C-terminal domain}
i1_HQ_SD_c62545/f7p8/1882	BfAACT10441	{XP_017223112.1; PREDICTED: 3-ketoacyl-CoA thiolase 2, peroxisomal [Daucus carota subsp. sativus]}	{sp|Q56WD9|THIK2_ARATH; 3-ketoacyl-CoA thiolase 2, peroxisomal OS=Arabidopsis thaliana OX=3702 GN=PED1 PE=1 SV=2}	{sind:105158640; K07513 ACAA1 acetyl-CoA acyltransferase 1 2.3.1.16 ko01212; Metabolism; Global and overview maps; Fatty acid metabolism | ko00071; Metabolism; Lipid metabolism; Fatty acid degradation | ko00592; Metabolism; Lipid metabolism; alpha-Linolenic acid metabolism | ko01040; Metabolism; Lipid metabolism; Biosynthesis of unsaturated fatty acids | ko00280; Metabolism; Amino acid metabolism…	{At2g33150; KOG1389 3-oxoacyl CoA thiolase I Lipid transport and metabolism ;}	{GO:0016747; transferase activity, transferring acyl groups other than amino-acyl groups; molecular_function GO:0008152; NA}	{XM_017367623.1; PREDICTED: Daucus carota subsp. sativus 3-ketoacyl-CoA thiolase 2, peroxisomal (LOC108199687), mRNA}	{PF02803:Thiolase, C-terminal domain PF00108:Thiolase, N-terminal domain}
i1_HQ_SD_c69591/f16p0/1945	BfAACT10957	{XP_017223112.1; PREDICTED: 3-ketoacyl-CoA thiolase 2, peroxisomal [Daucus carota subsp. sativus]}	{sp|Q56WD9|THIK2_ARATH; 3-ketoacyl-CoA thiolase 2, peroxisomal OS=Arabidopsis thaliana OX=3702 GN=PED1 PE=1 SV=2}	{sind:105158640; K07513 ACAA1 acetyl-CoA acyltransferase 1 2.3.1.16 ko01212; Metabolism; Global and overview maps; Fatty acid metabolism | ko00071; Metabolism; Lipid metabolism; Fatty acid degradation | ko00592; Metabolism; Lipid metabolism; alpha-Linolenic acid metabolism | ko01040; Metabolism; Lipid metabolism; Biosynthesis of unsaturated fatty acids | ko00280; Metabolism; Amino acid metabolism…	{At2g33150; KOG1389 3-oxoacyl CoA thiolase I Lipid transport and metabolism ;}	{GO:0008152; NA GO:0016747; transferase activity, transferring acyl groups other than amino-acyl groups; molecular_function}	{XM_017367623.1; PREDICTED: Daucus carota subsp. sativus 3-ketoacyl-CoA thiolase 2, peroxisomal (LOC108199687), mRNA}	{PF02803:Thiolase, C-terminal domain PF00108:Thiolase, N-terminal domain}
i1_HQ_SD_c7602/f3p8/1893	BfAACT11206	{XP_017223112.1; PREDICTED: 3-ketoacyl-CoA thiolase 2, peroxisomal [Daucus carota subsp. sativus]}	{sp|Q56WD9|THIK2_ARATH; 3-ketoacyl-CoA thiolase 2, peroxisomal OS=Arabidopsis thaliana OX=3702 GN=PED1 PE=1 SV=2}	{sind:105158640; K07513 ACAA1 acetyl-CoA acyltransferase 1 2.3.1.16 ko01212; Metabolism; Global and overview maps; Fatty acid metabolism | ko00071; Metabolism; Lipid metabolism; Fatty acid degradation | ko00592; Metabolism; Lipid metabolism; alpha-Linolenic acid metabolism | ko01040; Metabolism; Lipid metabolism; Biosynthesis of unsaturated fatty acids | ko00280; Metabolism; Amino acid metabolism…	{At2g33150; KOG1389 3-oxoacyl CoA thiolase I Lipid transport and metabolism ;}	{GO:0008152; NA GO:0016747; transferase activity, transferring acyl groups other than amino-acyl groups; molecular_function}	{XM_017367623.1; PREDICTED: Daucus carota subsp. sativus 3-ketoacyl-CoA thiolase 2, peroxisomal (LOC108199687), mRNA}	{PF00108:Thiolase, N-terminal domain PF02803:Thiolase, C-terminal domain}
i1_LQ_SD_c19291/f1p0/1778	BfAACT13962	{XP_017223112.1; PREDICTED: 3-ketoacyl-CoA thiolase 2, peroxisomal [Daucus carota subsp. sativus]}	{sp|Q56WD9|THIK2_ARATH; 3-ketoacyl-CoA thiolase 2, peroxisomal OS=Arabidopsis thaliana OX=3702 GN=PED1 PE=1 SV=2}	{sind:105158640; K07513 ACAA1 acetyl-CoA acyltransferase 1 2.3.1.16 ko01212; Metabolism; Global and overview maps; Fatty acid metabolism | ko00071; Metabolism; Lipid metabolism; Fatty acid degradation | ko00592; Metabolism; Lipid metabolism; alpha-Linolenic acid metabolism | ko01040; Metabolism; Lipid metabolism; Biosynthesis of unsaturated fatty acids | ko00280; Metabolism; Amino acid metabolism…	{At2g33150; KOG1389 3-oxoacyl CoA thiolase I Lipid transport and metabolism ;}	{GO:0008152; NA GO:0016747; transferase activity, transferring acyl groups other than amino-acyl groups; molecular_function}	{XM_017367623.1; PREDICTED: Daucus carota subsp. sativus 3-ketoacyl-CoA thiolase 2, peroxisomal (LOC108199687), mRNA}	{PF00108:Thiolase, N-terminal domain}
i1_LQ_SD_c27368/f1p1/1618	BfAACT17088	{XP_017230692.1; PREDICTED: 3-ketoacyl-CoA thiolase 2, peroxisomal-like [Daucus carota subsp. sativus]}	{sp|Q56WD9|THIK2_ARATH; 3-ketoacyl-CoA thiolase 2, peroxisomal OS=Arabidopsis thaliana OX=3702 GN=PED1 PE=1 SV=2}	{pper:PRUPE_ppa005303mg; K07513 ACAA1 acetyl-CoA acyltransferase 1 2.3.1.16 ko01212; Metabolism; Global and overview maps; Fatty acid metabolism | ko00071; Metabolism; Lipid metabolism; Fatty acid degradation | ko00592; Metabolism; Lipid metabolism; alpha-Linolenic acid metabolism | ko01040; Metabolism; Lipid metabolism; Biosynthesis of unsaturated fatty acids | ko00280; Metabolism; Amino acid me…	{At2g33150; KOG1389 3-oxoacyl CoA thiolase I Lipid transport and metabolism ;}	{GO:0008152; NA GO:0016747; transferase activity, transferring acyl groups other than amino-acyl groups; molecular_function}	{XM_017375203.1; PREDICTED: Daucus carota subsp. sativus 3-ketoacyl-CoA thiolase 2, peroxisomal-like (LOC108205300), mRNA}	{PF02803:Thiolase, C-terminal domain PF00108:Thiolase, N-terminal domain}
i1_LQ_SD_c2810/f1p0/1847	BfAACT17382	{KZM85203.1; hypothetical protein DCAR_027375 [Daucus carota subsp. sativus]}	{sp|Q56WD9|THIK2_ARATH; 3-ketoacyl-CoA thiolase 2, peroxisomal OS=Arabidopsis thaliana OX=3702 GN=PED1 PE=1 SV=2}	{sind:105158640; K07513 ACAA1 acetyl-CoA acyltransferase 1 2.3.1.16 ko01212; Metabolism; Global and overview maps; Fatty acid metabolism | ko00071; Metabolism; Lipid metabolism; Fatty acid degradation | ko00592; Metabolism; Lipid metabolism; alpha-Linolenic acid metabolism | ko01040; Metabolism; Lipid metabolism; Biosynthesis of unsaturated fatty acids | ko00280; Metabolism; Amino acid metabolism…	{At2g33150; KOG1389 3-oxoacyl CoA thiolase I Lipid transport and metabolism ;}	{GO:0016747; transferase activity, transferring acyl groups other than amino-acyl groups; molecular_function GO:0008152; NA}	{XM_017367623.1; PREDICTED: Daucus carota subsp. sativus 3-ketoacyl-CoA thiolase 2, peroxisomal (LOC108199687), mRNA}	{PF00108:Thiolase, N-terminal domain}
i1_LQ_SD_c32813/f1p0/1601	BfAACT18000	{XP_017230692.1; PREDICTED: 3-ketoacyl-CoA thiolase 2, peroxisomal-like [Daucus carota subsp. sativus]}	{sp|Q56WD9|THIK2_ARATH; 3-ketoacyl-CoA thiolase 2, peroxisomal OS=Arabidopsis thaliana OX=3702 GN=PED1 PE=1 SV=2}	{pper:PRUPE_ppa005303mg; K07513 ACAA1 acetyl-CoA acyltransferase 1 2.3.1.16 ko01212; Metabolism; Global and overview maps; Fatty acid metabolism | ko00071; Metabolism; Lipid metabolism; Fatty acid degradation | ko00592; Metabolism; Lipid metabolism; alpha-Linolenic acid metabolism | ko01040; Metabolism; Lipid metabolism; Biosynthesis of unsaturated fatty acids | ko00280; Metabolism; Amino acid me…	{At2g33150; KOG1389 3-oxoacyl CoA thiolase I Lipid transport and metabolism ;}	{GO:0008152; NA GO:0016747; transferase activity, transferring acyl groups other than amino-acyl groups; molecular_function}	{XM_017375203.1; PREDICTED: Daucus carota subsp. sativus 3-ketoacyl-CoA thiolase 2, peroxisomal-like (LOC108205300), mRNA}	{PF00108:Thiolase, N-terminal domain PF02803:Thiolase, C-terminal domain}
i1_LQ_SD_c36249/f1p1/1601	BfAACT19483	{XP_017223112.1; PREDICTED: 3-ketoacyl-CoA thiolase 2, peroxisomal [Daucus carota subsp. sativus]}	{sp|Q56WD9|THIK2_ARATH; 3-ketoacyl-CoA thiolase 2, peroxisomal OS=Arabidopsis thaliana OX=3702 GN=PED1 PE=1 SV=2}	{sind:105158640; K07513 ACAA1 acetyl-CoA acyltransferase 1 2.3.1.16 ko01212; Metabolism; Global and overview maps; Fatty acid metabolism | ko00071; Metabolism; Lipid metabolism; Fatty acid degradation | ko00592; Metabolism; Lipid metabolism; alpha-Linolenic acid metabolism | ko01040; Metabolism; Lipid metabolism; Biosynthesis of unsaturated fatty acids | ko00280; Metabolism; Amino acid metabolism…	{At2g33150; KOG1389 3-oxoacyl CoA thiolase I Lipid transport and metabolism ;}	{GO:0016747; transferase activity, transferring acyl groups other than amino-acyl groups; molecular_function GO:0008152; NA}	{XM_017367623.1; PREDICTED: Daucus carota subsp. sativus 3-ketoacyl-CoA thiolase 2, peroxisomal (LOC108199687), mRNA}	{PF00108:Thiolase, N-terminal domain PF02803:Thiolase, C-terminal domain}
i1_LQ_SD_c37014/f2p0/1960	BfAACT19807	{XP_017223112.1; PREDICTED: 3-ketoacyl-CoA thiolase 2, peroxisomal [Daucus carota subsp. sativus]}	{sp|Q56WD9|THIK2_ARATH; 3-ketoacyl-CoA thiolase 2, peroxisomal OS=Arabidopsis thaliana OX=3702 GN=PED1 PE=1 SV=2}	{sind:105158640; K07513 ACAA1 acetyl-CoA acyltransferase 1 2.3.1.16 ko01212; Metabolism; Global and overview maps; Fatty acid metabolism | ko00071; Metabolism; Lipid metabolism; Fatty acid degradation | ko00592; Metabolism; Lipid metabolism; alpha-Linolenic acid metabolism | ko01040; Metabolism; Lipid metabolism; Biosynthesis of unsaturated fatty acids | ko00280; Metabolism; Amino acid metabolism…	{At2g33150; KOG1389 3-oxoacyl CoA thiolase I Lipid transport and metabolism ;}	{GO:0008152; NA GO:0016747; transferase activity, transferring acyl groups other than amino-acyl groups; molecular_function}	{XM_017367623.1; PREDICTED: Daucus carota subsp. sativus 3-ketoacyl-CoA thiolase 2, peroxisomal (LOC108199687), mRNA}	{PF00108:Thiolase, N-terminal domain PF02803:Thiolase, C-terminal domain}
i1_LQ_SD_c38982/f1p0/1751	BfAACT20645	{XP_017223112.1; PREDICTED: 3-ketoacyl-CoA thiolase 2, peroxisomal [Daucus carota subsp. sativus]}	{sp|Q56WD9|THIK2_ARATH; 3-ketoacyl-CoA thiolase 2, peroxisomal OS=Arabidopsis thaliana OX=3702 GN=PED1 PE=1 SV=2}	{sind:105158640; K07513 ACAA1 acetyl-CoA acyltransferase 1 2.3.1.16 ko01212; Metabolism; Global and overview maps; Fatty acid metabolism | ko00071; Metabolism; Lipid metabolism; Fatty acid degradation | ko00592; Metabolism; Lipid metabolism; alpha-Linolenic acid metabolism | ko01040; Metabolism; Lipid metabolism; Biosynthesis of unsaturated fatty acids | ko00280; Metabolism; Amino acid metabolism…	{At2g33150; KOG1389 3-oxoacyl CoA thiolase I Lipid transport and metabolism ;}	{GO:0016747; transferase activity, transferring acyl groups other than amino-acyl groups; molecular_function GO:0008152; NA}	{XM_017367623.1; PREDICTED: Daucus carota subsp. sativus 3-ketoacyl-CoA thiolase 2, peroxisomal (LOC108199687), mRNA}	{PF02803:Thiolase, C-terminal domain PF00108:Thiolase, N-terminal domain}
i1_LQ_SD_c52907/f1p0/1970	BfAACT24777	{XP_017223112.1; PREDICTED: 3-ketoacyl-CoA thiolase 2, peroxisomal [Daucus carota subsp. sativus]}	{sp|Q56WD9|THIK2_ARATH; 3-ketoacyl-CoA thiolase 2, peroxisomal OS=Arabidopsis thaliana OX=3702 GN=PED1 PE=1 SV=2}	{sind:105158640; K07513 ACAA1 acetyl-CoA acyltransferase 1 2.3.1.16 ko01212; Metabolism; Global and overview maps; Fatty acid metabolism | ko00071; Metabolism; Lipid metabolism; Fatty acid degradation | ko00592; Metabolism; Lipid metabolism; alpha-Linolenic acid metabolism | ko01040; Metabolism; Lipid metabolism; Biosynthesis of unsaturated fatty acids | ko00280; Metabolism; Amino acid metabolism…	{At2g33150; KOG1389 3-oxoacyl CoA thiolase I Lipid transport and metabolism ;}	{GO:0008152; NA GO:0016747; transferase activity, transferring acyl groups other than amino-acyl groups; molecular_function}	{XM_017367623.1; PREDICTED: Daucus carota subsp. sativus 3-ketoacyl-CoA thiolase 2, peroxisomal (LOC108199687), mRNA}	{PF00108:Thiolase, N-terminal domain}
i1_LQ_SD_c54869/f1p1/1415	BfAACT25634	{JAT46694.1; 3-ketoacyl-CoA thiolase B, peroxisomal [Anthurium amnicola]}	{sp|Q05493|THIK_YARLI; 3-ketoacyl-CoA thiolase, peroxisomal OS=Yarrowia lipolytica (strain CLIB 122 / E 150) OX=284591 GN=POT1 PE=3 SV=1}	{mus:103971688; K07513 ACAA1 acetyl-CoA acyltransferase 1 2.3.1.16 ko01212; Metabolism; Global and overview maps; Fatty acid metabolism | ko00071; Metabolism; Lipid metabolism; Fatty acid degradation | ko00592; Metabolism; Lipid metabolism; alpha-Linolenic acid metabolism | ko01040; Metabolism; Lipid metabolism; Biosynthesis of unsaturated fatty acids | ko00280; Metabolism; Amino acid metabolism;…	{Hs4501853; KOG1389 3-oxoacyl CoA thiolase I Lipid transport and metabolism ;}	{GO:0016747; transferase activity, transferring acyl groups other than amino-acyl groups; molecular_function GO:0006633; fatty acid biosynthetic process; biological_process GO:0008152; NA GO:0004315; 3-oxoacyl-[acyl-carrier-protein] synthase activity; molecular_function}	{NA}	{PF02803:Thiolase, C-terminal domain PF00108:Thiolase, N-terminal domain PF08545:3-Oxoacyl-[acyl-carrier-protein (ACP)] synthase III}
i1_LQ_SD_c55152/f1p0/1813	BfAACT25757	{XP_017223112.1; PREDICTED: 3-ketoacyl-CoA thiolase 2, peroxisomal [Daucus carota subsp. sativus]}	{sp|Q56WD9|THIK2_ARATH; 3-ketoacyl-CoA thiolase 2, peroxisomal OS=Arabidopsis thaliana OX=3702 GN=PED1 PE=1 SV=2}	{sind:105158640; K07513 ACAA1 acetyl-CoA acyltransferase 1 2.3.1.16 ko01212; Metabolism; Global and overview maps; Fatty acid metabolism | ko00071; Metabolism; Lipid metabolism; Fatty acid degradation | ko00592; Metabolism; Lipid metabolism; alpha-Linolenic acid metabolism | ko01040; Metabolism; Lipid metabolism; Biosynthesis of unsaturated fatty acids | ko00280; Metabolism; Amino acid metabolism…	{At2g33150; KOG1389 3-oxoacyl CoA thiolase I Lipid transport and metabolism ;}	{GO:0008152; NA GO:0016747; transferase activity, transferring acyl groups other than amino-acyl groups; molecular_function}	{XM_017367623.1; PREDICTED: Daucus carota subsp. sativus 3-ketoacyl-CoA thiolase 2, peroxisomal (LOC108199687), mRNA}	{PF02803:Thiolase, C-terminal domain PF00108:Thiolase, N-terminal domain}
i1_LQ_SD_c56700/f1p2/1684	BfAACT26456	{XP_017230692.1; PREDICTED: 3-ketoacyl-CoA thiolase 2, peroxisomal-like [Daucus carota subsp. sativus]}	{sp|Q56WD9|THIK2_ARATH; 3-ketoacyl-CoA thiolase 2, peroxisomal OS=Arabidopsis thaliana OX=3702 GN=PED1 PE=1 SV=2}	{pper:PRUPE_ppa005303mg; K07513 ACAA1 acetyl-CoA acyltransferase 1 2.3.1.16 ko01212; Metabolism; Global and overview maps; Fatty acid metabolism | ko00071; Metabolism; Lipid metabolism; Fatty acid degradation | ko00592; Metabolism; Lipid metabolism; alpha-Linolenic acid metabolism | ko01040; Metabolism; Lipid metabolism; Biosynthesis of unsaturated fatty acids | ko00280; Metabolism; Amino acid me…	{At2g33150; KOG1389 3-oxoacyl CoA thiolase I Lipid transport and metabolism ;}	{GO:0008152; NA GO:0016747; transferase activity, transferring acyl groups other than amino-acyl groups; molecular_function}	{XM_017375203.1; PREDICTED: Daucus carota subsp. sativus 3-ketoacyl-CoA thiolase 2, peroxisomal-like (LOC108205300), mRNA}	{PF00108:Thiolase, N-terminal domain PF02803:Thiolase, C-terminal domain}
i1_LQ_SD_c56946/f1p19/1882	BfAACT26563	{XP_017223112.1; PREDICTED: 3-ketoacyl-CoA thiolase 2, peroxisomal [Daucus carota subsp. sativus]}	{sp|Q56WD9|THIK2_ARATH; 3-ketoacyl-CoA thiolase 2, peroxisomal OS=Arabidopsis thaliana OX=3702 GN=PED1 PE=1 SV=2}	{sind:105158640; K07513 ACAA1 acetyl-CoA acyltransferase 1 2.3.1.16 ko01212; Metabolism; Global and overview maps; Fatty acid metabolism | ko00071; Metabolism; Lipid metabolism; Fatty acid degradation | ko00592; Metabolism; Lipid metabolism; alpha-Linolenic acid metabolism | ko01040; Metabolism; Lipid metabolism; Biosynthesis of unsaturated fatty acids | ko00280; Metabolism; Amino acid metabolism…	{At2g33150; KOG1389 3-oxoacyl CoA thiolase I Lipid transport and metabolism ;}	{GO:0008152; NA GO:0016747; transferase activity, transferring acyl groups other than amino-acyl groups; molecular_function}	{XM_017367623.1; PREDICTED: Daucus carota subsp. sativus 3-ketoacyl-CoA thiolase 2, peroxisomal (LOC108199687), mRNA}	{PF02803:Thiolase, C-terminal domain PF00108:Thiolase, N-terminal domain}
i1_LQ_SD_c6528/f1p1/1857	BfAACT27862	{XP_017223112.1; PREDICTED: 3-ketoacyl-CoA thiolase 2, peroxisomal [Daucus carota subsp. sativus]}	{sp|Q56WD9|THIK2_ARATH; 3-ketoacyl-CoA thiolase 2, peroxisomal OS=Arabidopsis thaliana OX=3702 GN=PED1 PE=1 SV=2}	{sind:105158640; K07513 ACAA1 acetyl-CoA acyltransferase 1 2.3.1.16 ko01212; Metabolism; Global and overview maps; Fatty acid metabolism | ko00071; Metabolism; Lipid metabolism; Fatty acid degradation | ko00592; Metabolism; Lipid metabolism; alpha-Linolenic acid metabolism | ko01040; Metabolism; Lipid metabolism; Biosynthesis of unsaturated fatty acids | ko00280; Metabolism; Amino acid metabolism…	{At2g33150; KOG1389 3-oxoacyl CoA thiolase I Lipid transport and metabolism ;}	{GO:0016747; transferase activity, transferring acyl groups other than amino-acyl groups; molecular_function GO:0008152; NA}	{XM_017367623.1; PREDICTED: Daucus carota subsp. sativus 3-ketoacyl-CoA thiolase 2, peroxisomal (LOC108199687), mRNA}	{PF00108:Thiolase, N-terminal domain}
i2_LQ_SD_c27299/f1p4/2866	BfAACT44162	{KZM85203.1; hypothetical protein DCAR_027375 [Daucus carota subsp. sativus]}	{sp|Q56WD9|THIK2_ARATH; 3-ketoacyl-CoA thiolase 2, peroxisomal OS=Arabidopsis thaliana OX=3702 GN=PED1 PE=1 SV=2}	{sind:105158640; K07513 ACAA1 acetyl-CoA acyltransferase 1 2.3.1.16 ko01212; Metabolism; Global and overview maps; Fatty acid metabolism | ko00071; Metabolism; Lipid metabolism; Fatty acid degradation | ko00592; Metabolism; Lipid metabolism; alpha-Linolenic acid metabolism | ko01040; Metabolism; Lipid metabolism; Biosynthesis of unsaturated fatty acids | ko00280; Metabolism; Amino acid metabolism…	{At2g33150; KOG1389 3-oxoacyl CoA thiolase I Lipid transport and metabolism ;}	{GO:0016747; transferase activity, transferring acyl groups other than amino-acyl groups; molecular_function GO:0008152; NA}	{XM_017367623.1; PREDICTED: Daucus carota subsp. sativus 3-ketoacyl-CoA thiolase 2, peroxisomal (LOC108199687), mRNA}	{PF00108:Thiolase, N-terminal domain PF02803:Thiolase, C-terminal domain}
i2_LQ_SD_c7775/f1p1/2930	BfAACT59304	{XP_017230692.1; PREDICTED: 3-ketoacyl-CoA thiolase 2, peroxisomal-like [Daucus carota subsp. sativus]}	{sp|Q56WD9|THIK2_ARATH; 3-ketoacyl-CoA thiolase 2, peroxisomal OS=Arabidopsis thaliana OX=3702 GN=PED1 PE=1 SV=2}	{pxb:103960456; K07513 ACAA1 acetyl-CoA acyltransferase 1 2.3.1.16 ko01212; Metabolism; Global and overview maps; Fatty acid metabolism | ko00071; Metabolism; Lipid metabolism; Fatty acid degradation | ko00592; Metabolism; Lipid metabolism; alpha-Linolenic acid metabolism | ko01040; Metabolism; Lipid metabolism; Biosynthesis of unsaturated fatty acids | ko00280; Metabolism; Amino acid metabolism;…	{At2g33150; KOG1389 3-oxoacyl CoA thiolase I Lipid transport and metabolism ;}	{GO:0008152; NA GO:0016747; transferase activity, transferring acyl groups other than amino-acyl groups; molecular_function}	{XM_017375203.1; PREDICTED: Daucus carota subsp. sativus 3-ketoacyl-CoA thiolase 2, peroxisomal-like (LOC108205300), mRNA}	{PF00108:Thiolase, N-terminal domain}
i2_LQ_SD_c87681/f1p4/2878	BfAACT60404	{XP_017223112.1; PREDICTED: 3-ketoacyl-CoA thiolase 2, peroxisomal [Daucus carota subsp. sativus]}	{sp|Q56WD9|THIK2_ARATH; 3-ketoacyl-CoA thiolase 2, peroxisomal OS=Arabidopsis thaliana OX=3702 GN=PED1 PE=1 SV=2}	{sind:105158640; K07513 ACAA1 acetyl-CoA acyltransferase 1 2.3.1.16 ko01212; Metabolism; Global and overview maps; Fatty acid metabolism | ko00071; Metabolism; Lipid metabolism; Fatty acid degradation | ko00592; Metabolism; Lipid metabolism; alpha-Linolenic acid metabolism | ko01040; Metabolism; Lipid metabolism; Biosynthesis of unsaturated fatty acids | ko00280; Metabolism; Amino acid metabolism…	{At2g33150; KOG1389 3-oxoacyl CoA thiolase I Lipid transport and metabolism ;}	{GO:0016747; transferase activity, transferring acyl groups other than amino-acyl groups; molecular_function GO:0008152; NA}	{XM_017367623.1; PREDICTED: Daucus carota subsp. sativus 3-ketoacyl-CoA thiolase 2, peroxisomal (LOC108199687), mRNA}	{PF00108:Thiolase, N-terminal domain}
i2_LQ_SD_c93519/f1p4/2983	BfAACT62894	{KZM85203.1; hypothetical protein DCAR_027375 [Daucus carota subsp. sativus]}	{sp|Q56WD9|THIK2_ARATH; 3-ketoacyl-CoA thiolase 2, peroxisomal OS=Arabidopsis thaliana OX=3702 GN=PED1 PE=1 SV=2}	{cic:CICLE_v10004931mg; K07513 ACAA1 acetyl-CoA acyltransferase 1 2.3.1.16 ko01212; Metabolism; Global and overview maps; Fatty acid metabolism | ko00071; Metabolism; Lipid metabolism; Fatty acid degradation | ko00592; Metabolism; Lipid metabolism; alpha-Linolenic acid metabolism | ko01040; Metabolism; Lipid metabolism; Biosynthesis of unsaturated fatty acids | ko00280; Metabolism; Amino acid met…	{At2g33150; KOG1389 3-oxoacyl CoA thiolase I Lipid transport and metabolism ;}	{GO:0016747; transferase activity, transferring acyl groups other than amino-acyl groups; molecular_function GO:0008152; NA}	{XM_017367623.1; PREDICTED: Daucus carota subsp. sativus 3-ketoacyl-CoA thiolase 2, peroxisomal (LOC108199687), mRNA}	{PF00108:Thiolase, N-terminal domain}
i3_LQ_SD_c13243/f1p1/3225	BfAACT68476	{XP_017223112.1; PREDICTED: 3-ketoacyl-CoA thiolase 2, peroxisomal [Daucus carota subsp. sativus]}	{sp|Q56WD9|THIK2_ARATH; 3-ketoacyl-CoA thiolase 2, peroxisomal OS=Arabidopsis thaliana OX=3702 GN=PED1 PE=1 SV=2}	{sind:105158640; K07513 ACAA1 acetyl-CoA acyltransferase 1 2.3.1.16 ko01212; Metabolism; Global and overview maps; Fatty acid metabolism | ko00071; Metabolism; Lipid metabolism; Fatty acid degradation | ko00592; Metabolism; Lipid metabolism; alpha-Linolenic acid metabolism | ko01040; Metabolism; Lipid metabolism; Biosynthesis of unsaturated fatty acids | ko00280; Metabolism; Amino acid metabolism…	{At2g33150; KOG1389 3-oxoacyl CoA thiolase I Lipid transport and metabolism ;}	{GO:0016747; transferase activity, transferring acyl groups other than amino-acyl groups; molecular_function GO:0008152; NA}	{XM_017367623.1; PREDICTED: Daucus carota subsp. sativus 3-ketoacyl-CoA thiolase 2, peroxisomal (LOC108199687), mRNA}	{PF00108:Thiolase, N-terminal domain}
i3_LQ_SD_c19871/f1p4/3222	BfAACT70239	{KZM85203.1; hypothetical protein DCAR_027375 [Daucus carota subsp. sativus]}	{sp|Q56WD9|THIK2_ARATH; 3-ketoacyl-CoA thiolase 2, peroxisomal OS=Arabidopsis thaliana OX=3702 GN=PED1 PE=1 SV=2}	{sind:105158640; K07513 ACAA1 acetyl-CoA acyltransferase 1 2.3.1.16 ko01212; Metabolism; Global and overview maps; Fatty acid metabolism | ko00071; Metabolism; Lipid metabolism; Fatty acid degradation | ko00592; Metabolism; Lipid metabolism; alpha-Linolenic acid metabolism | ko01040; Metabolism; Lipid metabolism; Biosynthesis of unsaturated fatty acids | ko00280; Metabolism; Amino acid metabolism…	{At2g33150; KOG1389 3-oxoacyl CoA thiolase I Lipid transport and metabolism ;}	{GO:0008152; NA GO:0016747; transferase activity, transferring acyl groups other than amino-acyl groups; molecular_function}	{XM_017367623.1; PREDICTED: Daucus carota subsp. sativus 3-ketoacyl-CoA thiolase 2, peroxisomal (LOC108199687), mRNA}	{PF00108:Thiolase, N-terminal domain}
i3_LQ_SD_c36010/f1p0/3714	BfAACT76294	{GAU28057.1; hypothetical protein TSUD_265150 [Trifolium subterraneum]}	{sp|Q56WD9|THIK2_ARATH; 3-ketoacyl-CoA thiolase 2, peroxisomal OS=Arabidopsis thaliana OX=3702 GN=PED1 PE=1 SV=2}	{pxb:103960456; K07513 ACAA1 acetyl-CoA acyltransferase 1 2.3.1.16 ko01212; Metabolism; Global and overview maps; Fatty acid metabolism | ko00071; Metabolism; Lipid metabolism; Fatty acid degradation | ko00592; Metabolism; Lipid metabolism; alpha-Linolenic acid metabolism | ko01040; Metabolism; Lipid metabolism; Biosynthesis of unsaturated fatty acids | ko00280; Metabolism; Amino acid metabolism;…	{At2g33150; KOG1389 3-oxoacyl CoA thiolase I Lipid transport and metabolism ;}	{GO:0008152; NA GO:0016747; transferase activity, transferring acyl groups other than amino-acyl groups; molecular_function}	{XM_016840836.1; PREDICTED: Gossypium hirsutum 3-ketoacyl-CoA thiolase 2, peroxisomal-like (LOC107912592), mRNA}	{PF02803:Thiolase, C-terminal domain}
i4_LQ_SD_c47640/f1p4/4918	BfAACT97358	{XP_017223112.1; PREDICTED: 3-ketoacyl-CoA thiolase 2, peroxisomal [Daucus carota subsp. sativus]}	{sp|Q56WD9|THIK2_ARATH; 3-ketoacyl-CoA thiolase 2, peroxisomal OS=Arabidopsis thaliana OX=3702 GN=PED1 PE=1 SV=2}	{lang:109338708; K07513 ACAA1 acetyl-CoA acyltransferase 1 2.3.1.16 ko01212; Metabolism; Global and overview maps; Fatty acid metabolism | ko00071; Metabolism; Lipid metabolism; Fatty acid degradation | ko00592; Metabolism; Lipid metabolism; alpha-Linolenic acid metabolism | ko01040; Metabolism; Lipid metabolism; Biosynthesis of unsaturated fatty acids | ko00280; Metabolism; Amino acid metabolism…	{At2g33150; KOG1389 3-oxoacyl CoA thiolase I Lipid transport and metabolism ;}	{GO:0008152; NA GO:0016747; transferase activity, transferring acyl groups other than amino-acyl groups; molecular_function}	{XM_017367623.1; PREDICTED: Daucus carota subsp. sativus 3-ketoacyl-CoA thiolase 2, peroxisomal (LOC108199687), mRNA}	{PF00108:Thiolase, N-terminal domain}
i5_LQ_SD_c10861/f1p0/5368	BfAACT109308	{XP_017223112.1; PREDICTED: 3-ketoacyl-CoA thiolase 2, peroxisomal [Daucus carota subsp. sativus]}	{sp|Q8LF48|THIK1_ARATH; 3-ketoacyl-CoA thiolase 1, peroxisomal OS=Arabidopsis thaliana OX=3702 GN=KAT1 PE=1 SV=2}	{cmo:103483502; K07513 ACAA1 acetyl-CoA acyltransferase 1 2.3.1.16 ko01212; Metabolism; Global and overview maps; Fatty acid metabolism | ko00071; Metabolism; Lipid metabolism; Fatty acid degradation | ko00592; Metabolism; Lipid metabolism; alpha-Linolenic acid metabolism | ko01040; Metabolism; Lipid metabolism; Biosynthesis of unsaturated fatty acids | ko00280; Metabolism; Amino acid metabolism;…	{At1g04710; KOG1389 3-oxoacyl CoA thiolase I Lipid transport and metabolism ;}	{GO:0008152; NA GO:0016747; transferase activity, transferring acyl groups other than amino-acyl groups; molecular_function}	{XM_017367623.1; PREDICTED: Daucus carota subsp. sativus 3-ketoacyl-CoA thiolase 2, peroxisomal (LOC108199687), mRNA}	{PF02803:Thiolase, C-terminal domain}
i1_LQ_SD_c18104/f1p2/1780	BfHMGS13500	{XP_017236990.1; PREDICTED: hydroxymethylglutaryl-CoA synthase [Daucus carota subsp. sativus]}	{sp|P54873|HMCS_ARATH; Hydroxymethylglutaryl-CoA synthase OS=Arabidopsis thaliana OX=3702 GN=HMGS PE=1 SV=2}	{gra:105789162; K01641 E2.3.3.10 hydroxymethylglutaryl-CoA synthase 2.3.3.10 ko00650; Metabolism; Carbohydrate metabolism; Butanoate metabolism | ko00072; Metabolism; Lipid metabolism; Synthesis and degradation of ketone bodies | ko00280; Metabolism; Amino acid metabolism; Valine, leucine and isoleucine degradation | ko00900; Metabolism; Metabolism of terpenoids and polyketides; Terpenoid backbon…	{At4g11820; KOG1393 Hydroxymethylglutaryl-CoA synthase I Lipid transport and metabolism ;}	{GO:0008299; isoprenoid biosynthetic process; biological_process GO:0004421; hydroxymethylglutaryl-CoA synthase activity; molecular_function}	{XM_017381501.1; PREDICTED: Daucus carota subsp. sativus hydroxymethylglutaryl-CoA synthase (LOC108210207), mRNA}	{PF01154:Hydroxymethylglutaryl-coenzyme A synthase N terminal PF08540:Hydroxymethylglutaryl-coenzyme A synthase C terminal}
i1_LQ_SD_c21426/f1p2/1708	BfHMGS14802	{XP_017236990.1; PREDICTED: hydroxymethylglutaryl-CoA synthase [Daucus carota subsp. sativus]}	{sp|P54873|HMCS_ARATH; Hydroxymethylglutaryl-CoA synthase OS=Arabidopsis thaliana OX=3702 GN=HMGS PE=1 SV=2}	{gra:105789162; K01641 E2.3.3.10 hydroxymethylglutaryl-CoA synthase 2.3.3.10 ko00650; Metabolism; Carbohydrate metabolism; Butanoate metabolism | ko00072; Metabolism; Lipid metabolism; Synthesis and degradation of ketone bodies | ko00280; Metabolism; Amino acid metabolism; Valine, leucine and isoleucine degradation | ko00900; Metabolism; Metabolism of terpenoids and polyketides; Terpenoid backbon…	{At4g11820; KOG1393 Hydroxymethylglutaryl-CoA synthase I Lipid transport and metabolism ;}	{GO:0008299; isoprenoid biosynthetic process; biological_process GO:0004421; hydroxymethylglutaryl-CoA synthase activity; molecular_function}	{XM_017381501.1; PREDICTED: Daucus carota subsp. sativus hydroxymethylglutaryl-CoA synthase (LOC108210207), mRNA}	{PF08540:Hydroxymethylglutaryl-coenzyme A synthase C terminal}
i1_LQ_SD_c40371/f1p6/1885	BfHMGS21253	{JAT63377.1; Hydroxymethylglutaryl-CoA synthase, mitochondrial [Anthurium amnicola]}	{sp|P54874|HMCS_SCHPO; Hydroxymethylglutaryl-CoA synthase OS=Schizosaccharomyces pombe (strain 972 / ATCC 24843) OX=284812 GN=hcs1 PE=1 SV=1}	{dosa:Os03t0118800-01; K01641 E2.3.3.10 hydroxymethylglutaryl-CoA synthase 2.3.3.10 ko00650; Metabolism; Carbohydrate metabolism; Butanoate metabolism | ko00072; Metabolism; Lipid metabolism; Synthesis and degradation of ketone bodies | ko00280; Metabolism; Amino acid metabolism; Valine, leucine and isoleucine degradation | ko00900; Metabolism; Metabolism of terpenoids and polyketides; Terpenoid …	{SPAC4F8.14c; KOG1393 Hydroxymethylglutaryl-CoA synthase I Lipid transport and metabolism ;}	{GO:0004421; hydroxymethylglutaryl-CoA synthase activity; molecular_function GO:0008299; isoprenoid biosynthetic process; biological_process}	{NA}	{PF08540:Hydroxymethylglutaryl-coenzyme A synthase C terminal PF01154:Hydroxymethylglutaryl-coenzyme A synthase N terminal}
i1_LQ_SD_c70970/f1p4/1808	BfHMGS28284	{XP_017236990.1; PREDICTED: hydroxymethylglutaryl-CoA synthase [Daucus carota subsp. sativus]}	{sp|P54873|HMCS_ARATH; Hydroxymethylglutaryl-CoA synthase OS=Arabidopsis thaliana OX=3702 GN=HMGS PE=1 SV=2}	{gra:105789162; K01641 E2.3.3.10 hydroxymethylglutaryl-CoA synthase 2.3.3.10 ko00650; Metabolism; Carbohydrate metabolism; Butanoate metabolism | ko00072; Metabolism; Lipid metabolism; Synthesis and degradation of ketone bodies | ko00280; Metabolism; Amino acid metabolism; Valine, leucine and isoleucine degradation | ko00900; Metabolism; Metabolism of terpenoids and polyketides; Terpenoid backbon…	{At4g11820; KOG1393 Hydroxymethylglutaryl-CoA synthase I Lipid transport and metabolism ;}	{GO:0004421; hydroxymethylglutaryl-CoA synthase activity; molecular_function GO:0008299; isoprenoid biosynthetic process; biological_process}	{XM_017381501.1; PREDICTED: Daucus carota subsp. sativus hydroxymethylglutaryl-CoA synthase (LOC108210207), mRNA}	{PF08540:Hydroxymethylglutaryl-coenzyme A synthase C terminal PF01154:Hydroxymethylglutaryl-coenzyme A synthase N terminal}
i2_LQ_SD_c22832/f1p0/2462	BfHMGS42447	{XP_017236990.1; PREDICTED: hydroxymethylglutaryl-CoA synthase [Daucus carota subsp. sativus]}	{sp|P54873|HMCS_ARATH; Hydroxymethylglutaryl-CoA synthase OS=Arabidopsis thaliana OX=3702 GN=HMGS PE=1 SV=2}	{gra:105789162; K01641 E2.3.3.10 hydroxymethylglutaryl-CoA synthase 2.3.3.10 ko00650; Metabolism; Carbohydrate metabolism; Butanoate metabolism | ko00072; Metabolism; Lipid metabolism; Synthesis and degradation of ketone bodies | ko00280; Metabolism; Amino acid metabolism; Valine, leucine and isoleucine degradation | ko00900; Metabolism; Metabolism of terpenoids and polyketides; Terpenoid backbon…	{At4g11820; KOG1393 Hydroxymethylglutaryl-CoA synthase I Lipid transport and metabolism ;}	{GO:0004421; hydroxymethylglutaryl-CoA synthase activity; molecular_function GO:0008299; isoprenoid biosynthetic process; biological_process}	{KP702301.1; Panax notoginseng 3-hydroxy-3-methylglutaryl coenzyme-A synthase mRNA, complete cds}	{PF08540:Hydroxymethylglutaryl-coenzyme A synthase C terminal}
i2_LQ_SD_c25594/f1p0/2222	BfHMGS43492	{XP_017245371.1; PREDICTED: uncharacterized protein LOC108217030 [Daucus carota subsp. sativus]}	{sp|P54873|HMCS_ARATH; Hydroxymethylglutaryl-CoA synthase OS=Arabidopsis thaliana OX=3702 GN=HMGS PE=1 SV=2}	{jcu:105628273; - - - - -}	{At4g29090; KOG1075 FOG: Reverse transcriptase R General function prediction only ;}	{NA}	{NA}	{NA}
i2_LQ_SD_c54777/f1p0/2590	BfHMGS52090	{XP_017236990.1; PREDICTED: hydroxymethylglutaryl-CoA synthase [Daucus carota subsp. sativus]}	{sp|P54873|HMCS_ARATH; Hydroxymethylglutaryl-CoA synthase OS=Arabidopsis thaliana OX=3702 GN=HMGS PE=1 SV=2}	{gra:105789162; K01641 E2.3.3.10 hydroxymethylglutaryl-CoA synthase 2.3.3.10 ko00650; Metabolism; Carbohydrate metabolism; Butanoate metabolism | ko00072; Metabolism; Lipid metabolism; Synthesis and degradation of ketone bodies | ko00280; Metabolism; Amino acid metabolism; Valine, leucine and isoleucine degradation | ko00900; Metabolism; Metabolism of terpenoids and polyketides; Terpenoid backbon…	{At4g11820; KOG1393 Hydroxymethylglutaryl-CoA synthase I Lipid transport and metabolism ;}	{GO:0004421; hydroxymethylglutaryl-CoA synthase activity; molecular_function GO:0003887; DNA-directed DNA polymerase activity; molecular_function GO:0008299; isoprenoid biosynthetic process; biological_process}	{XM_017381501.1; PREDICTED: Daucus carota subsp. sativus hydroxymethylglutaryl-CoA synthase (LOC108210207), mRNA}	{PF08540:Hydroxymethylglutaryl-coenzyme A synthase C terminal PF08452:DNA polymerase family B exonuclease domain, N-terminal PF01154:Hydroxymethylglutaryl-coenzyme A synthase N terminal}
i2_LQ_SD_c81249/f1p0/2079	BfHMGS59745	{XP_011029156.1; PREDICTED: hydroxymethylglutaryl-CoA synthase-like [Populus euphratica]}	{sp|P54873|HMCS_ARATH; Hydroxymethylglutaryl-CoA synthase OS=Arabidopsis thaliana OX=3702 GN=HMGS PE=1 SV=2}	{pop:POPTR_0001s08600g; K01641 E2.3.3.10 hydroxymethylglutaryl-CoA synthase 2.3.3.10 ko00650; Metabolism; Carbohydrate metabolism; Butanoate metabolism | ko00072; Metabolism; Lipid metabolism; Synthesis and degradation of ketone bodies | ko00280; Metabolism; Amino acid metabolism; Valine, leucine and isoleucine degradation | ko00900; Metabolism; Metabolism of terpenoids and polyketides; Terpenoid…	{At4g11820; KOG1393 Hydroxymethylglutaryl-CoA synthase I Lipid transport and metabolism ;}	{GO:0008299; isoprenoid biosynthetic process; biological_process GO:0003887; DNA-directed DNA polymerase activity; molecular_function GO:0004421; hydroxymethylglutaryl-CoA synthase activity; molecular_function}	{XM_017381501.1; PREDICTED: Daucus carota subsp. sativus hydroxymethylglutaryl-CoA synthase (LOC108210207), mRNA}	{PF08452:DNA polymerase family B exonuclease domain, N-terminal PF08540:Hydroxymethylglutaryl-coenzyme A synthase C terminal PF01154:Hydroxymethylglutaryl-coenzyme A synthase N terminal}
i1_LQ_SD_c53248/f1p2/1934	BfHMGR24906	{AIX87979.1; 3-hydroxy-3-methylglutaryl coenzyme A reductase [Panax ginseng]}	{sp|P29057|HMDH1_HEVBR; 3-hydroxy-3-methylglutaryl-coenzyme A reductase 1 OS=Hevea brasiliensis OX=3981 GN=HMGR1 PE=2 SV=1}	{lang:109360654; K00021 HMGCR hydroxymethylglutaryl-CoA reductase (NADPH) 1.1.1.34 ko00900; Metabolism; Metabolism of terpenoids and polyketides; Terpenoid backbone biosynthesis | ko04152; Environmental Information Processing; Signal transduction; AMPK signaling pathway | ko04976; Organismal Systems; Digestive system; Bile secretion; lang:109360654; - - - - -}	{At1g76490; KOG2480 3-hydroxy-3-methylglutaryl-CoA (HMG-CoA) reductase I Lipid transport and metabolism ;}	{GO:0050662; coenzyme binding; molecular_function GO:0015936; coenzyme A metabolic process; biological_process GO:0055114; oxidation-reduction process; biological_process GO:0004420; hydroxymethylglutaryl-CoA reductase (NADPH) activity; molecular_function}	{XM_017397681.1; PREDICTED: Daucus carota subsp. sativus 3-hydroxy-3-methylglutaryl-coenzyme A reductase 1-like (LOC108223417), mRNA}	{PF00368:Hydroxymethylglutaryl-coenzyme A reductase}
i2_HQ_SD_c103139/f37p4/2214	BfHMGR29810	{XP_017238733.1; PREDICTED: 3-hydroxy-3-methylglutaryl-coenzyme A reductase 1-like [Daucus carota subsp. sativus]}	{sp|P29057|HMDH1_HEVBR; 3-hydroxy-3-methylglutaryl-coenzyme A reductase 1 OS=Hevea brasiliensis OX=3981 GN=HMGR1 PE=2 SV=1}	{lang:109360654; K00021 HMGCR hydroxymethylglutaryl-CoA reductase (NADPH) 1.1.1.34 ko00900; Metabolism; Metabolism of terpenoids and polyketides; Terpenoid backbone biosynthesis | ko04152; Environmental Information Processing; Signal transduction; AMPK signaling pathway | ko04976; Organismal Systems; Digestive system; Bile secretion; lang:109360654; - - - - -}	{At1g76490; KOG2480 3-hydroxy-3-methylglutaryl-CoA (HMG-CoA) reductase I Lipid transport and metabolism ;}	{GO:0015936; coenzyme A metabolic process; biological_process GO:0050662; coenzyme binding; molecular_function GO:0004420; hydroxymethylglutaryl-CoA reductase (NADPH) activity; molecular_function GO:0055114; oxidation-reduction process; biological_process}	{KX056076.1; Hedera helix hydroxymethylglutaryl-CoA reductase (HMGR) mRNA, complete cds}	{PF00368:Hydroxymethylglutaryl-coenzyme A reductase}
i2_HQ_SD_c40259/f2p0/2198	BfHMGR32984	{ACV65036.1; 3-hydroxy-3-methylglutaryl coenzyme A reductase [Panax quinquefolius]}	{sp|P48020|HMDH1_SOLTU; 3-hydroxy-3-methylglutaryl-coenzyme A reductase 1 OS=Solanum tuberosum OX=4113 GN=HMG1 PE=2 SV=1}	{cmo:103490442; K00021 HMGCR hydroxymethylglutaryl-CoA reductase (NADPH) 1.1.1.34 ko00900; Metabolism; Metabolism of terpenoids and polyketides; Terpenoid backbone biosynthesis | ko04152; Environmental Information Processing; Signal transduction; AMPK signaling pathway | ko04976; Organismal Systems; Digestive system; Bile secretion}	{At1g76490; KOG2480 3-hydroxy-3-methylglutaryl-CoA (HMG-CoA) reductase I Lipid transport and metabolism ;}	{GO:0004420; hydroxymethylglutaryl-CoA reductase (NADPH) activity; molecular_function GO:0055114; oxidation-reduction process; biological_process GO:0050662; coenzyme binding; molecular_function GO:0015936; coenzyme A metabolic process; biological_process}	{KJ804166.1; Panax notoginseng isolate CL2349Contig2_HMGR 3-hydroxy-3-methylglutaryl coenzyme A reductase mRNA, complete cds}	{PF00368:Hydroxymethylglutaryl-coenzyme A reductase}
i2_HQ_SD_c51538/f4p3/2194	BfHMGR33504	{AIX87979.1; 3-hydroxy-3-methylglutaryl coenzyme A reductase [Panax ginseng]}	{sp|P29057|HMDH1_HEVBR; 3-hydroxy-3-methylglutaryl-coenzyme A reductase 1 OS=Hevea brasiliensis OX=3981 GN=HMGR1 PE=2 SV=1}	{lang:109360654; K00021 HMGCR hydroxymethylglutaryl-CoA reductase (NADPH) 1.1.1.34 ko00900; Metabolism; Metabolism of terpenoids and polyketides; Terpenoid backbone biosynthesis | ko04152; Environmental Information Processing; Signal transduction; AMPK signaling pathway | ko04976; Organismal Systems; Digestive system; Bile secretion; lang:109360654; - - - - -}	{At1g76490; KOG2480 3-hydroxy-3-methylglutaryl-CoA (HMG-CoA) reductase I Lipid transport and metabolism ;}	{GO:0050662; coenzyme binding; molecular_function GO:0015936; coenzyme A metabolic process; biological_process GO:0055114; oxidation-reduction process; biological_process GO:0004420; hydroxymethylglutaryl-CoA reductase (NADPH) activity; molecular_function}	{XM_017397681.1; PREDICTED: Daucus carota subsp. sativus 3-hydroxy-3-methylglutaryl-coenzyme A reductase 1-like (LOC108223417), mRNA}	{PF00368:Hydroxymethylglutaryl-coenzyme A reductase}
i2_HQ_SD_c78067/f2p2/2278	BfHMGR34491	{XP_017238733.1; PREDICTED: 3-hydroxy-3-methylglutaryl-coenzyme A reductase 1-like [Daucus carota subsp. sativus]}	{sp|P29057|HMDH1_HEVBR; 3-hydroxy-3-methylglutaryl-coenzyme A reductase 1 OS=Hevea brasiliensis OX=3981 GN=HMGR1 PE=2 SV=1}	{lang:109360654; K00021 HMGCR hydroxymethylglutaryl-CoA reductase (NADPH) 1.1.1.34 ko00900; Metabolism; Metabolism of terpenoids and polyketides; Terpenoid backbone biosynthesis | ko04152; Environmental Information Processing; Signal transduction; AMPK signaling pathway | ko04976; Organismal Systems; Digestive system; Bile secretion; lang:109360654; - - - - -}	{At1g76490; KOG2480 3-hydroxy-3-methylglutaryl-CoA (HMG-CoA) reductase I Lipid transport and metabolism ;}	{GO:0055114; oxidation-reduction process; biological_process GO:0004420; hydroxymethylglutaryl-CoA reductase (NADPH) activity; molecular_function GO:0015936; coenzyme A metabolic process; biological_process GO:0050662; coenzyme binding; molecular_function}	{XM_017383244.1; PREDICTED: Daucus carota subsp. sativus 3-hydroxy-3-methylglutaryl-coenzyme A reductase 1-like (LOC108211606), mRNA}	{PF00368:Hydroxymethylglutaryl-coenzyme A reductase}
i2_LQ_SD_c100416/f1p3/2043	BfHMGR35352	{AIX87979.1; 3-hydroxy-3-methylglutaryl coenzyme A reductase [Panax ginseng]}	{sp|P29057|HMDH1_HEVBR; 3-hydroxy-3-methylglutaryl-coenzyme A reductase 1 OS=Hevea brasiliensis OX=3981 GN=HMGR1 PE=2 SV=1}	{lang:109360654; K00021 HMGCR hydroxymethylglutaryl-CoA reductase (NADPH) 1.1.1.34 ko00900; Metabolism; Metabolism of terpenoids and polyketides; Terpenoid backbone biosynthesis | ko04152; Environmental Information Processing; Signal transduction; AMPK signaling pathway | ko04976; Organismal Systems; Digestive system; Bile secretion; lang:109360654; - - - - -}	{At1g76490; KOG2480 3-hydroxy-3-methylglutaryl-CoA (HMG-CoA) reductase I Lipid transport and metabolism ;}	{GO:0055114; oxidation-reduction process; biological_process GO:0004420; hydroxymethylglutaryl-CoA reductase (NADPH) activity; molecular_function GO:0050662; coenzyme binding; molecular_function GO:0015936; coenzyme A metabolic process; biological_process}	{XM_017397681.1; PREDICTED: Daucus carota subsp. sativus 3-hydroxy-3-methylglutaryl-coenzyme A reductase 1-like (LOC108223417), mRNA}	{PF00368:Hydroxymethylglutaryl-coenzyme A reductase}
i2_LQ_SD_c116069/f1p4/2134	BfHMGR38595	{XP_017238733.1; PREDICTED: 3-hydroxy-3-methylglutaryl-coenzyme A reductase 1-like [Daucus carota subsp. sativus]}	{sp|P29057|HMDH1_HEVBR; 3-hydroxy-3-methylglutaryl-coenzyme A reductase 1 OS=Hevea brasiliensis OX=3981 GN=HMGR1 PE=2 SV=1}	{lang:109360654; K00021 HMGCR hydroxymethylglutaryl-CoA reductase (NADPH) 1.1.1.34 ko00900; Metabolism; Metabolism of terpenoids and polyketides; Terpenoid backbone biosynthesis | ko04152; Environmental Information Processing; Signal transduction; AMPK signaling pathway | ko04976; Organismal Systems; Digestive system; Bile secretion; lang:109360654; - - - - -}	{At1g76490; KOG2480 3-hydroxy-3-methylglutaryl-CoA (HMG-CoA) reductase I Lipid transport and metabolism ;}	{GO:0050662; coenzyme binding; molecular_function GO:0015936; coenzyme A metabolic process; biological_process GO:0055114; oxidation-reduction process; biological_process GO:0004420; hydroxymethylglutaryl-CoA reductase (NADPH) activity; molecular_function}	{KX056076.1; Hedera helix hydroxymethylglutaryl-CoA reductase (HMGR) mRNA, complete cds}	{PF00368:Hydroxymethylglutaryl-coenzyme A reductase}
i2_LQ_SD_c28866/f1p3/2956	BfHMGR44817	{AIX87979.1; 3-hydroxy-3-methylglutaryl coenzyme A reductase [Panax ginseng]}	{sp|P29057|HMDH1_HEVBR; 3-hydroxy-3-methylglutaryl-coenzyme A reductase 1 OS=Hevea brasiliensis OX=3981 GN=HMGR1 PE=2 SV=1}	{lang:109360654; K00021 HMGCR hydroxymethylglutaryl-CoA reductase (NADPH) 1.1.1.34 ko00900; Metabolism; Metabolism of terpenoids and polyketides; Terpenoid backbone biosynthesis | ko04152; Environmental Information Processing; Signal transduction; AMPK signaling pathway | ko04976; Organismal Systems; Digestive system; Bile secretion; lang:109360654; - - - - -}	{At1g76490; KOG2480 3-hydroxy-3-methylglutaryl-CoA (HMG-CoA) reductase I Lipid transport and metabolism ;}	{GO:0055114; oxidation-reduction process; biological_process GO:0004420; hydroxymethylglutaryl-CoA reductase (NADPH) activity; molecular_function GO:0015936; coenzyme A metabolic process; biological_process GO:0050662; coenzyme binding; molecular_function}	{AY796343.1; Eucommia ulmoides 3-hydroxy-3-methylglutaryl coenzyme A reductase (HMGR) mRNA, complete cds}	{PF00368:Hydroxymethylglutaryl-coenzyme A reductase}
i2_LQ_SD_c3525/f1p0/2258	BfHMGR46019	{AKP55621.1; 3-hydroxy-3-methylglutaryl coenzyme-A reductase [Panax notoginseng]}	{sp|O64966|HMDH1_GOSHI; 3-hydroxy-3-methylglutaryl-coenzyme A reductase 1 OS=Gossypium hirsutum OX=3635 GN=HMG1 PE=3 SV=1}	{gra:105773783; K00021 HMGCR hydroxymethylglutaryl-CoA reductase (NADPH) 1.1.1.34 ko00900; Metabolism; Metabolism of terpenoids and polyketides; Terpenoid backbone biosynthesis | ko04152; Environmental Information Processing; Signal transduction; AMPK signaling pathway | ko04976; Organismal Systems; Digestive system; Bile secretion}	{At1g76490; KOG2480 3-hydroxy-3-methylglutaryl-CoA (HMG-CoA) reductase I Lipid transport and metabolism ;}	{GO:0050662; coenzyme binding; molecular_function GO:0015936; coenzyme A metabolic process; biological_process GO:0055114; oxidation-reduction process; biological_process GO:0004420; hydroxymethylglutaryl-CoA reductase (NADPH) activity; molecular_function}	{KJ804166.1; Panax notoginseng isolate CL2349Contig2_HMGR 3-hydroxy-3-methylglutaryl coenzyme A reductase mRNA, complete cds}	{PF00368:Hydroxymethylglutaryl-coenzyme A reductase}
i2_LQ_SD_c35394/f1p0/2181	BfHMGR46071	{ACV65036.1; 3-hydroxy-3-methylglutaryl coenzyme A reductase [Panax quinquefolius]}	{sp|O64966|HMDH1_GOSHI; 3-hydroxy-3-methylglutaryl-coenzyme A reductase 1 OS=Gossypium hirsutum OX=3635 GN=HMG1 PE=3 SV=1}	{gra:105773783; K00021 HMGCR hydroxymethylglutaryl-CoA reductase (NADPH) 1.1.1.34 ko00900; Metabolism; Metabolism of terpenoids and polyketides; Terpenoid backbone biosynthesis | ko04152; Environmental Information Processing; Signal transduction; AMPK signaling pathway | ko04976; Organismal Systems; Digestive system; Bile secretion}	{At1g76490; KOG2480 3-hydroxy-3-methylglutaryl-CoA (HMG-CoA) reductase I Lipid transport and metabolism ;}	{GO:0004420; hydroxymethylglutaryl-CoA reductase (NADPH) activity; molecular_function GO:0055114; oxidation-reduction process; biological_process GO:0050662; coenzyme binding; molecular_function GO:0015936; coenzyme A metabolic process; biological_process}	{KJ804166.1; Panax notoginseng isolate CL2349Contig2_HMGR 3-hydroxy-3-methylglutaryl coenzyme A reductase mRNA, complete cds}	{PF00368:Hydroxymethylglutaryl-coenzyme A reductase}
i2_LQ_SD_c36231/f1p2/2788	BfHMGR46411	{AJV26444.1; 3-hydroxy-3-methylglutaryl coenzyme A reductase [Panax ginseng]}	{sp|P29057|HMDH1_HEVBR; 3-hydroxy-3-methylglutaryl-coenzyme A reductase 1 OS=Hevea brasiliensis OX=3981 GN=HMGR1 PE=2 SV=1}	{cic:CICLE_v10000761mg; K00021 HMGCR hydroxymethylglutaryl-CoA reductase (NADPH) 1.1.1.34 ko00900; Metabolism; Metabolism of terpenoids and polyketides; Terpenoid backbone biosynthesis | ko04152; Environmental Information Processing; Signal transduction; AMPK signaling pathway | ko04976; Organismal Systems; Digestive system; Bile secretion}	{At1g76490; KOG2480 3-hydroxy-3-methylglutaryl-CoA (HMG-CoA) reductase I Lipid transport and metabolism ;}	{GO:0015936; coenzyme A metabolic process; biological_process GO:0050662; coenzyme binding; molecular_function GO:0055114; oxidation-reduction process; biological_process GO:0004420; hydroxymethylglutaryl-CoA reductase (NADPH) activity; molecular_function}	{AP012059.1; Lotus japonicus genomic DNA, clone: LjB04N17, BM2654, complete sequence}	{PF00368:Hydroxymethylglutaryl-coenzyme A reductase}
i2_LQ_SD_c3840/f1p0/2775	BfHMGR47221	{ACV65036.1; 3-hydroxy-3-methylglutaryl coenzyme A reductase [Panax quinquefolius]}	{sp|P48020|HMDH1_SOLTU; 3-hydroxy-3-methylglutaryl-coenzyme A reductase 1 OS=Solanum tuberosum OX=4113 GN=HMG1 PE=2 SV=1}	{cmo:103490442; K00021 HMGCR hydroxymethylglutaryl-CoA reductase (NADPH) 1.1.1.34 ko00900; Metabolism; Metabolism of terpenoids and polyketides; Terpenoid backbone biosynthesis | ko04152; Environmental Information Processing; Signal transduction; AMPK signaling pathway | ko04976; Organismal Systems; Digestive system; Bile secretion}	{At1g76490; KOG2480 3-hydroxy-3-methylglutaryl-CoA (HMG-CoA) reductase I Lipid transport and metabolism ;}	{GO:0055114; oxidation-reduction process; biological_process GO:0004420; hydroxymethylglutaryl-CoA reductase (NADPH) activity; molecular_function GO:0050662; coenzyme binding; molecular_function GO:0015936; coenzyme A metabolic process; biological_process}	{KP702300.1; Panax notoginseng 3-hydroxy-3-methylglutaryl coenzyme-A reductase mRNA, complete cds}	{PF00368:Hydroxymethylglutaryl-coenzyme A reductase}
i2_LQ_SD_c38751/f1p3/2981	BfHMGR47368	{AJV26444.1; 3-hydroxy-3-methylglutaryl coenzyme A reductase [Panax ginseng]}	{sp|P29057|HMDH1_HEVBR; 3-hydroxy-3-methylglutaryl-coenzyme A reductase 1 OS=Hevea brasiliensis OX=3981 GN=HMGR1 PE=2 SV=1}	{lang:109360654; K00021 HMGCR hydroxymethylglutaryl-CoA reductase (NADPH) 1.1.1.34 ko00900; Metabolism; Metabolism of terpenoids and polyketides; Terpenoid backbone biosynthesis | ko04152; Environmental Information Processing; Signal transduction; AMPK signaling pathway | ko04976; Organismal Systems; Digestive system; Bile secretion; lang:109360654; - - - - -}	{At1g76490; KOG2480 3-hydroxy-3-methylglutaryl-CoA (HMG-CoA) reductase I Lipid transport and metabolism ;}	{GO:0016021; integral to membrane; cellular_component GO:0015936; coenzyme A metabolic process; biological_process GO:0050662; coenzyme binding; molecular_function GO:0006614; SRP-dependent cotranslational protein targeting to membrane; biological_process GO:0055114; oxidation-reduction process; biological_process GO:0004420; hydroxymethylglutaryl-CoA reductase (NADPH) activity; molecular_functio…	{XM_019605690.1; PREDICTED: Lupinus angustifolius 3-hydroxy-3-methylglutaryl-coenzyme A reductase 1-like (LOC109360654), transcript variant X2, mRNA}	{PF00368:Hydroxymethylglutaryl-coenzyme A reductase PF07074:Translocon-associated protein, gamma subunit (TRAP-gamma)}
i2_LQ_SD_c38950/f1p0/2497	BfHMGR47447	{AKP55621.1; 3-hydroxy-3-methylglutaryl coenzyme-A reductase [Panax notoginseng]}	{sp|O64966|HMDH1_GOSHI; 3-hydroxy-3-methylglutaryl-coenzyme A reductase 1 OS=Gossypium hirsutum OX=3635 GN=HMG1 PE=3 SV=1}	{gra:105773783; K00021 HMGCR hydroxymethylglutaryl-CoA reductase (NADPH) 1.1.1.34 ko00900; Metabolism; Metabolism of terpenoids and polyketides; Terpenoid backbone biosynthesis | ko04152; Environmental Information Processing; Signal transduction; AMPK signaling pathway | ko04976; Organismal Systems; Digestive system; Bile secretion}	{At1g76490; KOG2480 3-hydroxy-3-methylglutaryl-CoA (HMG-CoA) reductase I Lipid transport and metabolism ;}	{GO:0050662; coenzyme binding; molecular_function GO:0015936; coenzyme A metabolic process; biological_process GO:0055114; oxidation-reduction process; biological_process GO:0004420; hydroxymethylglutaryl-CoA reductase (NADPH) activity; molecular_function}	{KP702300.1; Panax notoginseng 3-hydroxy-3-methylglutaryl coenzyme-A reductase mRNA, complete cds}	{PF00368:Hydroxymethylglutaryl-coenzyme A reductase}
i2_LQ_SD_c56008/f1p2/2536	BfHMGR52564	{AIX87979.1; 3-hydroxy-3-methylglutaryl coenzyme A reductase [Panax ginseng]}	{sp|P29057|HMDH1_HEVBR; 3-hydroxy-3-methylglutaryl-coenzyme A reductase 1 OS=Hevea brasiliensis OX=3981 GN=HMGR1 PE=2 SV=1}	{lang:109360654; K00021 HMGCR hydroxymethylglutaryl-CoA reductase (NADPH) 1.1.1.34 ko00900; Metabolism; Metabolism of terpenoids and polyketides; Terpenoid backbone biosynthesis | ko04152; Environmental Information Processing; Signal transduction; AMPK signaling pathway | ko04976; Organismal Systems; Digestive system; Bile secretion; lang:109360654; - - - - -}	{At1g76490; KOG2480 3-hydroxy-3-methylglutaryl-CoA (HMG-CoA) reductase I Lipid transport and metabolism ;}	{GO:0004420; hydroxymethylglutaryl-CoA reductase (NADPH) activity; molecular_function GO:0055114; oxidation-reduction process; biological_process GO:0006614; SRP-dependent cotranslational protein targeting to membrane; biological_process GO:0050662; coenzyme binding; molecular_function GO:0016021; integral to membrane; cellular_component GO:0015936; coenzyme A metabolic process; biological_proces…	{XM_017383244.1; PREDICTED: Daucus carota subsp. sativus 3-hydroxy-3-methylglutaryl-coenzyme A reductase 1-like (LOC108211606), mRNA}	{PF00368:Hydroxymethylglutaryl-coenzyme A reductase PF07074:Translocon-associated protein, gamma subunit (TRAP-gamma)}
i2_LQ_SD_c57076/f1p3/2933	BfHMGR53027	{AJV26444.1; 3-hydroxy-3-methylglutaryl coenzyme A reductase [Panax ginseng]}	{sp|P29057|HMDH1_HEVBR; 3-hydroxy-3-methylglutaryl-coenzyme A reductase 1 OS=Hevea brasiliensis OX=3981 GN=HMGR1 PE=2 SV=1}	{cic:CICLE_v10000761mg; K00021 HMGCR hydroxymethylglutaryl-CoA reductase (NADPH) 1.1.1.34 ko00900; Metabolism; Metabolism of terpenoids and polyketides; Terpenoid backbone biosynthesis | ko04152; Environmental Information Processing; Signal transduction; AMPK signaling pathway | ko04976; Organismal Systems; Digestive system; Bile secretion}	{At1g76490; KOG2480 3-hydroxy-3-methylglutaryl-CoA (HMG-CoA) reductase I Lipid transport and metabolism ;}	{GO:0004420; hydroxymethylglutaryl-CoA reductase (NADPH) activity; molecular_function GO:0055114; oxidation-reduction process; biological_process GO:0050662; coenzyme binding; molecular_function GO:0015936; coenzyme A metabolic process; biological_process}	{FJ149009.1; Daucus carota subsp. sativus clone BAC C079I02 genomic sequence}	{PF00368:Hydroxymethylglutaryl-coenzyme A reductase}
i2_LQ_SD_c63997/f1p3/2035	BfHMGR54955	{AIX87979.1; 3-hydroxy-3-methylglutaryl coenzyme A reductase [Panax ginseng]}	{sp|P29057|HMDH1_HEVBR; 3-hydroxy-3-methylglutaryl-coenzyme A reductase 1 OS=Hevea brasiliensis OX=3981 GN=HMGR1 PE=2 SV=1}	{sind:105158861; K00021 HMGCR hydroxymethylglutaryl-CoA reductase (NADPH) 1.1.1.34 ko00900; Metabolism; Metabolism of terpenoids and polyketides; Terpenoid backbone biosynthesis | ko04152; Environmental Information Processing; Signal transduction; AMPK signaling pathway | ko04976; Organismal Systems; Digestive system; Bile secretion}	{At1g76490; KOG2480 3-hydroxy-3-methylglutaryl-CoA (HMG-CoA) reductase I Lipid transport and metabolism ;}	{GO:0050662; coenzyme binding; molecular_function GO:0015936; coenzyme A metabolic process; biological_process GO:0055114; oxidation-reduction process; biological_process GO:0004420; hydroxymethylglutaryl-CoA reductase (NADPH) activity; molecular_function}	{XM_017397681.1; PREDICTED: Daucus carota subsp. sativus 3-hydroxy-3-methylglutaryl-coenzyme A reductase 1-like (LOC108223417), mRNA}	{PF00368:Hydroxymethylglutaryl-coenzyme A reductase}
i2_LQ_SD_c69661/f1p3/2397	BfHMGR55846	{AIX87979.1; 3-hydroxy-3-methylglutaryl coenzyme A reductase [Panax ginseng]}	{sp|P29057|HMDH1_HEVBR; 3-hydroxy-3-methylglutaryl-coenzyme A reductase 1 OS=Hevea brasiliensis OX=3981 GN=HMGR1 PE=2 SV=1}	{lang:109360654; K00021 HMGCR hydroxymethylglutaryl-CoA reductase (NADPH) 1.1.1.34 ko00900; Metabolism; Metabolism of terpenoids and polyketides; Terpenoid backbone biosynthesis | ko04152; Environmental Information Processing; Signal transduction; AMPK signaling pathway | ko04976; Organismal Systems; Digestive system; Bile secretion; lang:109360654; - - - - -}	{At1g76490; KOG2480 3-hydroxy-3-methylglutaryl-CoA (HMG-CoA) reductase I Lipid transport and metabolism ;}	{GO:0004420; hydroxymethylglutaryl-CoA reductase (NADPH) activity; molecular_function GO:0055114; oxidation-reduction process; biological_process GO:0050662; coenzyme binding; molecular_function GO:0015936; coenzyme A metabolic process; biological_process}	{KJ939263.1; Panax ginseng 3-hydroxy-3-methylglutaryl coenzyme A reductase (HMGR) mRNA, complete cds}	{PF00368:Hydroxymethylglutaryl-coenzyme A reductase}
i2_LQ_SD_c77740/f1p2/2762	BfHMGR59300	{AJV26444.1; 3-hydroxy-3-methylglutaryl coenzyme A reductase [Panax ginseng]}	{sp|P29057|HMDH1_HEVBR; 3-hydroxy-3-methylglutaryl-coenzyme A reductase 1 OS=Hevea brasiliensis OX=3981 GN=HMGR1 PE=2 SV=1}	{cic:CICLE_v10000761mg; K00021 HMGCR hydroxymethylglutaryl-CoA reductase (NADPH) 1.1.1.34 ko00900; Metabolism; Metabolism of terpenoids and polyketides; Terpenoid backbone biosynthesis | ko04152; Environmental Information Processing; Signal transduction; AMPK signaling pathway | ko04976; Organismal Systems; Digestive system; Bile secretion}	{At1g76490; KOG2480 3-hydroxy-3-methylglutaryl-CoA (HMG-CoA) reductase I Lipid transport and metabolism ;}	{GO:0004420; hydroxymethylglutaryl-CoA reductase (NADPH) activity; molecular_function GO:0055114; oxidation-reduction process; biological_process GO:0015936; coenzyme A metabolic process; biological_process GO:0050662; coenzyme binding; molecular_function}	{XM_019605690.1; PREDICTED: Lupinus angustifolius 3-hydroxy-3-methylglutaryl-coenzyme A reductase 1-like (LOC109360654), transcript variant X2, mRNA}	{PF00368:Hydroxymethylglutaryl-coenzyme A reductase}
i2_LQ_SD_c7864/f1p3/1865	BfHMGR59554	{AIX87979.1; 3-hydroxy-3-methylglutaryl coenzyme A reductase [Panax ginseng]}	{sp|P29057|HMDH1_HEVBR; 3-hydroxy-3-methylglutaryl-coenzyme A reductase 1 OS=Hevea brasiliensis OX=3981 GN=HMGR1 PE=2 SV=1}	{cit:102609952; K00021 HMGCR hydroxymethylglutaryl-CoA reductase (NADPH) 1.1.1.34 ko00900; Metabolism; Metabolism of terpenoids and polyketides; Terpenoid backbone biosynthesis | ko04152; Environmental Information Processing; Signal transduction; AMPK signaling pathway | ko04976; Organismal Systems; Digestive system; Bile secretion}	{At1g76490; KOG2480 3-hydroxy-3-methylglutaryl-CoA (HMG-CoA) reductase I Lipid transport and metabolism ;}	{GO:0015936; coenzyme A metabolic process; biological_process GO:0050662; coenzyme binding; molecular_function GO:0055114; oxidation-reduction process; biological_process GO:0004420; hydroxymethylglutaryl-CoA reductase (NADPH) activity; molecular_function}	{XM_017397681.1; PREDICTED: Daucus carota subsp. sativus 3-hydroxy-3-methylglutaryl-coenzyme A reductase 1-like (LOC108223417), mRNA}	{PF00368:Hydroxymethylglutaryl-coenzyme A reductase}
i3_LQ_SD_c15647/f1p6/3022	BfHMGR69367	{AIX87979.1; 3-hydroxy-3-methylglutaryl coenzyme A reductase [Panax ginseng]}	{sp|P29057|HMDH1_HEVBR; 3-hydroxy-3-methylglutaryl-coenzyme A reductase 1 OS=Hevea brasiliensis OX=3981 GN=HMGR1 PE=2 SV=1}	{sot:102585007; K00021 HMGCR hydroxymethylglutaryl-CoA reductase (NADPH) 1.1.1.34 ko00900; Metabolism; Metabolism of terpenoids and polyketides; Terpenoid backbone biosynthesis | ko04152; Environmental Information Processing; Signal transduction; AMPK signaling pathway | ko04976; Organismal Systems; Digestive system; Bile secretion}	{At1g76490; KOG2480 3-hydroxy-3-methylglutaryl-CoA (HMG-CoA) reductase I Lipid transport and metabolism ;}	{GO:0050662; coenzyme binding; molecular_function GO:0015936; coenzyme A metabolic process; biological_process GO:0055114; oxidation-reduction process; biological_process GO:0004420; hydroxymethylglutaryl-CoA reductase (NADPH) activity; molecular_function}	{XM_017397681.1; PREDICTED: Daucus carota subsp. sativus 3-hydroxy-3-methylglutaryl-coenzyme A reductase 1-like (LOC108223417), mRNA}	{PF00368:Hydroxymethylglutaryl-coenzyme A reductase}
i3_LQ_SD_c23206/f1p14/3952	BfHMGR71881	{AJV26444.1; 3-hydroxy-3-methylglutaryl coenzyme A reductase [Panax ginseng]}	{sp|P29057|HMDH1_HEVBR; 3-hydroxy-3-methylglutaryl-coenzyme A reductase 1 OS=Hevea brasiliensis OX=3981 GN=HMGR1 PE=2 SV=1}	{lang:109360654; K00021 HMGCR hydroxymethylglutaryl-CoA reductase (NADPH) 1.1.1.34 ko00900; Metabolism; Metabolism of terpenoids and polyketides; Terpenoid backbone biosynthesis | ko04152; Environmental Information Processing; Signal transduction; AMPK signaling pathway | ko04976; Organismal Systems; Digestive system; Bile secretion; lang:109360654; - - - - -}	{At1g76490; KOG2480 3-hydroxy-3-methylglutaryl-CoA (HMG-CoA) reductase I Lipid transport and metabolism ;}	{GO:0015936; coenzyme A metabolic process; biological_process GO:0050662; coenzyme binding; molecular_function GO:0004420; hydroxymethylglutaryl-CoA reductase (NADPH) activity; molecular_function GO:0055114; oxidation-reduction process; biological_process}	{XM_017399005.1; PREDICTED: Daucus carota subsp. sativus uncharacterized LOC108224403 (LOC108224403), mRNA}	{PF00368:Hydroxymethylglutaryl-coenzyme A reductase}
i3_LQ_SD_c2733/f1p1/3429	BfHMGR73918	{AIX87979.1; 3-hydroxy-3-methylglutaryl coenzyme A reductase [Panax ginseng]}	{sp|P29057|HMDH1_HEVBR; 3-hydroxy-3-methylglutaryl-coenzyme A reductase 1 OS=Hevea brasiliensis OX=3981 GN=HMGR1 PE=2 SV=1}	{sot:102585007; K00021 HMGCR hydroxymethylglutaryl-CoA reductase (NADPH) 1.1.1.34 ko00900; Metabolism; Metabolism of terpenoids and polyketides; Terpenoid backbone biosynthesis | ko04152; Environmental Information Processing; Signal transduction; AMPK signaling pathway | ko04976; Organismal Systems; Digestive system; Bile secretion}	{At1g76490; KOG2480 3-hydroxy-3-methylglutaryl-CoA (HMG-CoA) reductase I Lipid transport and metabolism ;}	{GO:0004420; hydroxymethylglutaryl-CoA reductase (NADPH) activity; molecular_function GO:0055114; oxidation-reduction process; biological_process GO:0015936; coenzyme A metabolic process; biological_process GO:0050662; coenzyme binding; molecular_function}	{DQ153210.1; Bupleurum falcatum 3-hydroxy-3-methylglutaryl coenzyme A reductase mRNA, partial cds}	{PF00368:Hydroxymethylglutaryl-coenzyme A reductase}
i3_LQ_SD_c31646/f1p0/2982	BfHMGR75449	{XP_006342182.1; PREDICTED: 3-hydroxy-3-methylglutaryl-coenzyme A reductase 1-like [Solanum tuberosum]}	{sp|O64967|HMDH2_GOSHI; 3-hydroxy-3-methylglutaryl-coenzyme A reductase 2 OS=Gossypium hirsutum OX=3635 GN=HMG2 PE=3 SV=1}	{sot:102585007; K00021 HMGCR hydroxymethylglutaryl-CoA reductase (NADPH) 1.1.1.34 ko00900; Metabolism; Metabolism of terpenoids and polyketides; Terpenoid backbone biosynthesis | ko04152; Environmental Information Processing; Signal transduction; AMPK signaling pathway | ko04976; Organismal Systems; Digestive system; Bile secretion}	{At1g76490; KOG2480 3-hydroxy-3-methylglutaryl-CoA (HMG-CoA) reductase I Lipid transport and metabolism ;}	{NA}	{JF461267.1; Glycyrrhiza uralensis HMG-CoA reductase gene, complete cds}	{NA}
i3_LQ_SD_c35611/f1p1/3237	BfHMGR76092	{APY22354.1; hydroxymethylglutaryl-CoA reductase [Hedera helix]}	{sp|P29057|HMDH1_HEVBR; 3-hydroxy-3-methylglutaryl-coenzyme A reductase 1 OS=Hevea brasiliensis OX=3981 GN=HMGR1 PE=2 SV=1}	{lang:109360654; K00021 HMGCR hydroxymethylglutaryl-CoA reductase (NADPH) 1.1.1.34 ko00900; Metabolism; Metabolism of terpenoids and polyketides; Terpenoid backbone biosynthesis | ko04152; Environmental Information Processing; Signal transduction; AMPK signaling pathway | ko04976; Organismal Systems; Digestive system; Bile secretion; lang:109360654; - - - - -}	{At1g76490; KOG2480 3-hydroxy-3-methylglutaryl-CoA (HMG-CoA) reductase I Lipid transport and metabolism ;}	{GO:0006614; SRP-dependent cotranslational protein targeting to membrane; biological_process GO:0055114; oxidation-reduction process; biological_process GO:0004420; hydroxymethylglutaryl-CoA reductase (NADPH) activity; molecular_function GO:0016021; integral to membrane; cellular_component GO:0015936; coenzyme A metabolic process; biological_process GO:0050662; coenzyme binding; molecular_functio…	{EU400217.1; Bupleurum chinense 3-hydroxy-3-methylglutaryl coenzyme A reductase (HMGR) mRNA, partial cds}	{PF07074:Translocon-associated protein, gamma subunit (TRAP-gamma) PF00368:Hydroxymethylglutaryl-coenzyme A reductase}
i3_LQ_SD_c37119/f1p10/3466	BfHMGR76874	{AJV26444.1; 3-hydroxy-3-methylglutaryl coenzyme A reductase [Panax ginseng]}	{sp|O64966|HMDH1_GOSHI; 3-hydroxy-3-methylglutaryl-coenzyme A reductase 1 OS=Gossypium hirsutum OX=3635 GN=HMG1 PE=3 SV=1}	{gra:105773783; K00021 HMGCR hydroxymethylglutaryl-CoA reductase (NADPH) 1.1.1.34 ko00900; Metabolism; Metabolism of terpenoids and polyketides; Terpenoid backbone biosynthesis | ko04152; Environmental Information Processing; Signal transduction; AMPK signaling pathway | ko04976; Organismal Systems; Digestive system; Bile secretion}	{At1g76490; KOG2480 3-hydroxy-3-methylglutaryl-CoA (HMG-CoA) reductase I Lipid transport and metabolism ;}	{GO:0003677; DNA binding; molecular_function}	{XM_017399005.1; PREDICTED: Daucus carota subsp. sativus uncharacterized LOC108224403 (LOC108224403), mRNA}	{PF02362:B3 DNA binding domain}
i3_LQ_SD_c37856/f1p15/3564	BfHMGR77278	{AJV26444.1; 3-hydroxy-3-methylglutaryl coenzyme A reductase [Panax ginseng]}	{sp|O64966|HMDH1_GOSHI; 3-hydroxy-3-methylglutaryl-coenzyme A reductase 1 OS=Gossypium hirsutum OX=3635 GN=HMG1 PE=3 SV=1}	{gra:105773783; K00021 HMGCR hydroxymethylglutaryl-CoA reductase (NADPH) 1.1.1.34 ko00900; Metabolism; Metabolism of terpenoids and polyketides; Terpenoid backbone biosynthesis | ko04152; Environmental Information Processing; Signal transduction; AMPK signaling pathway | ko04976; Organismal Systems; Digestive system; Bile secretion}	{At1g76490; KOG2480 3-hydroxy-3-methylglutaryl-CoA (HMG-CoA) reductase I Lipid transport and metabolism ;}	{GO:0003677; DNA binding; molecular_function}	{XM_017399005.1; PREDICTED: Daucus carota subsp. sativus uncharacterized LOC108224403 (LOC108224403), mRNA}	{PF02362:B3 DNA binding domain}
i3_LQ_SD_c4051/f1p1/3567	BfHMGR78697	{AJV26444.1; 3-hydroxy-3-methylglutaryl coenzyme A reductase [Panax ginseng]}	{sp|P29057|HMDH1_HEVBR; 3-hydroxy-3-methylglutaryl-coenzyme A reductase 1 OS=Hevea brasiliensis OX=3981 GN=HMGR1 PE=2 SV=1}	{lang:109360654; K00021 HMGCR hydroxymethylglutaryl-CoA reductase (NADPH) 1.1.1.34 ko00900; Metabolism; Metabolism of terpenoids and polyketides; Terpenoid backbone biosynthesis | ko04152; Environmental Information Processing; Signal transduction; AMPK signaling pathway | ko04976; Organismal Systems; Digestive system; Bile secretion; lang:109360654; - - - - -}	{At1g76490; KOG2480 3-hydroxy-3-methylglutaryl-CoA (HMG-CoA) reductase I Lipid transport and metabolism ;}	{GO:0015936; coenzyme A metabolic process; biological_process GO:0050662; coenzyme binding; molecular_function GO:0055114; oxidation-reduction process; biological_process GO:0004420; hydroxymethylglutaryl-CoA reductase (NADPH) activity; molecular_function}	{EU400217.1; Bupleurum chinense 3-hydroxy-3-methylglutaryl coenzyme A reductase (HMGR) mRNA, partial cds}	{PF00368:Hydroxymethylglutaryl-coenzyme A reductase}
i3_LQ_SD_c8984/f1p0/3405	BfHMGR83750	{XP_010530977.1; PREDICTED: 3-hydroxy-3-methylglutaryl-coenzyme A reductase-like isoform X1 [Tarenaya hassleriana]}	{sp|S0DQM8|HMDH_GIBF5; 3-hydroxy-3-methylglutaryl-coenzyme A reductase OS=Gibberella fujikuroi (strain CBS 195.34 / IMI 58289 / NRRL A-6831) OX=1279085 GN=HMGR PE=3 SV=1}	{thj:104807413; K00021 HMGCR hydroxymethylglutaryl-CoA reductase (NADPH) 1.1.1.34 ko00900; Metabolism; Metabolism of terpenoids and polyketides; Terpenoid backbone biosynthesis | ko04152; Environmental Information Processing; Signal transduction; AMPK signaling pathway | ko04976; Organismal Systems; Digestive system; Bile secretion}	{YLR450w; KOG2480 3-hydroxy-3-methylglutaryl-CoA (HMG-CoA) reductase I Lipid transport and metabolism ;}	{GO:0004420; hydroxymethylglutaryl-CoA reductase (NADPH) activity; molecular_function GO:0055114; oxidation-reduction process; biological_process GO:0050662; coenzyme binding; molecular_function GO:0016021; integral to membrane; cellular_component GO:0015936; coenzyme A metabolic process; biological_process}	{NA}	{PF02460:Patched family PF00368:Hydroxymethylglutaryl-coenzyme A reductase}
i5_LQ_SD_c24628/f1p6/5471	BfHMGR114141	{AHZ59734.1; 3-hydroxy-3-methylglutaryl coenzyme A reductase [Panax notoginseng]}	{sp|Q01559|HMDH_NICSY; 3-hydroxy-3-methylglutaryl-coenzyme A reductase OS=Nicotiana sylvestris OX=4096 GN=HMGR PE=2 SV=1}	{nta:107772124; - - - - -}	{At1g76490; KOG2480 3-hydroxy-3-methylglutaryl-CoA (HMG-CoA) reductase I Lipid transport and metabolism ;}	{GO:0003677; DNA binding; molecular_function}	{XM_017399005.1; PREDICTED: Daucus carota subsp. sativus uncharacterized LOC108224403 (LOC108224403), mRNA}	{PF02362:B3 DNA binding domain}
i5_LQ_SD_c30782/f1p9/5039	BfHMGR116732	{AJV26444.1; 3-hydroxy-3-methylglutaryl coenzyme A reductase [Panax ginseng]}	{sp|P29057|HMDH1_HEVBR; 3-hydroxy-3-methylglutaryl-coenzyme A reductase 1 OS=Hevea brasiliensis OX=3981 GN=HMGR1 PE=2 SV=1}	{lang:109360654; K00021 HMGCR hydroxymethylglutaryl-CoA reductase (NADPH) 1.1.1.34 ko00900; Metabolism; Metabolism of terpenoids and polyketides; Terpenoid backbone biosynthesis | ko04152; Environmental Information Processing; Signal transduction; AMPK signaling pathway | ko04976; Organismal Systems; Digestive system; Bile secretion; lang:109360654; - - - - -}	{At1g76490; KOG2480 3-hydroxy-3-methylglutaryl-CoA (HMG-CoA) reductase I Lipid transport and metabolism ;}	{GO:0055114; oxidation-reduction process; biological_process GO:0004420; hydroxymethylglutaryl-CoA reductase (NADPH) activity; molecular_function GO:0050662; coenzyme binding; molecular_function GO:0015936; coenzyme A metabolic process; biological_process}	{XM_007030342.2; PREDICTED: Theobroma cacao protein prenyltransferase alpha subunit repeat-containing protein 1 (LOC18600068), transcript variant X3, mRNA}	{PF00368:Hydroxymethylglutaryl-coenzyme A reductase}
i6_LQ_SD_c2546/f1p1/6406	BfHMGR121523	{XP_017245376.1; PREDICTED: uncharacterized mitochondrial protein AtMg00810-like [Daucus carota subsp. sativus]}	{sp|Q01559|HMDH_NICSY; 3-hydroxy-3-methylglutaryl-coenzyme A reductase OS=Nicotiana sylvestris OX=4096 GN=HMGR PE=2 SV=1}	{sot:107060125; - - - - -}	{At1g57640; KOG0017 FOG: Transposon-encoded proteins with TYA, reverse transcriptase, integrase domains in various combinations R General function prediction only ;}	{GO:0050662; coenzyme binding; molecular_function GO:0015936; coenzyme A metabolic process; biological_process GO:0055114; oxidation-reduction process; biological_process GO:0004420; hydroxymethylglutaryl-CoA reductase (NADPH) activity; molecular_function}	{XM_003612374.2; Medicago truncatula 3-hydroxy-3-methylglutaryl-coenzyme A reductase-like protein mRNA}	{PF00368:Hydroxymethylglutaryl-coenzyme A reductase}
i8_LQ_SD_c210/f1p0/8971	BfHMGR123927	{AJV26444.1; 3-hydroxy-3-methylglutaryl coenzyme A reductase [Panax ginseng]}	{sp|P29057|HMDH1_HEVBR; 3-hydroxy-3-methylglutaryl-coenzyme A reductase 1 OS=Hevea brasiliensis OX=3981 GN=HMGR1 PE=2 SV=1}	{cic:CICLE_v10000761mg; K00021 HMGCR hydroxymethylglutaryl-CoA reductase (NADPH) 1.1.1.34 ko00900; Metabolism; Metabolism of terpenoids and polyketides; Terpenoid backbone biosynthesis | ko04152; Environmental Information Processing; Signal transduction; AMPK signaling pathway | ko04976; Organismal Systems; Digestive system; Bile secretion}	{At2g17370; KOG2480 3-hydroxy-3-methylglutaryl-CoA (HMG-CoA) reductase I Lipid transport and metabolism ;}	{GO:0015936; coenzyme A metabolic process; biological_process GO:0050662; coenzyme binding; molecular_function GO:0004420; hydroxymethylglutaryl-CoA reductase (NADPH) activity; molecular_function GO:0055114; oxidation-reduction process; biological_process}	{XM_017399005.1; PREDICTED: Daucus carota subsp. sativus uncharacterized LOC108224403 (LOC108224403), mRNA}	{PF00368:Hydroxymethylglutaryl-coenzyme A reductase}
i1_LQ_SD_c39816/f1p0/1598	BfHMGR21028	{XP_017218911.1; PREDICTED: uncharacterized protein LOC108196228 isoform X3 [Daucus carota subsp. sativus]}	{NA}	{vvi:100261483; - - - - -}	{NA}	{GO:0055114; oxidation-reduction process; biological_process GO:0004420; hydroxymethylglutaryl-CoA reductase (NADPH) activity; molecular_function GO:0015936; coenzyme A metabolic process; biological_process GO:0050662; coenzyme binding; molecular_function}	{XM_017363422.1; PREDICTED: Daucus carota subsp. sativus uncharacterized LOC108196228 (LOC108196228), transcript variant X3, mRNA}	{PF00368:Hydroxymethylglutaryl-coenzyme A reductase}
i1_HQ_SD_c2099/f5p3/1555	BfMK8279	{XP_017224290.1; PREDICTED: mevalonate kinase isoform X2 [Daucus carota subsp. sativus]}	{sp|P46086|KIME_ARATH; Mevalonate kinase OS=Arabidopsis thaliana OX=3702 GN=At5g27450 PE=2 SV=1}	{pper:PRUPE_ppa006979mg; K00869 E2.7.1.36, MVK, mvaK1 mevalonate kinase 2.7.1.36 ko00900; Metabolism; Metabolism of terpenoids and polyketides; Terpenoid backbone biosynthesis | ko04146; Cellular Processes; Transport and catabolism; Peroxisome}	{At5g27450; KOG1511 Mevalonate kinase MVK/ERG12 I Lipid transport and metabolism ;}	{GO:0005524; ATP binding; molecular_function GO:0005739; mitochondrion; cellular_component GO:0005747; mitochondrial respiratory chain complex I; cellular_component}	{XM_017368801.1; PREDICTED: Daucus carota subsp. sativus mevalonate kinase (LOC108200591), transcript variant X2, mRNA}	{PF15088:NADH dehydrogenase [ubiquinone] 1 subunit C1, mitochondrial PF00288:GHMP kinases N terminal domain}
i3_LQ_SD_c21143/f1p0/3812	BfMK70843	{XP_017224289.1; PREDICTED: mevalonate kinase isoform X1 [Daucus carota subsp. sativus]}	{sp|P46086|KIME_ARATH; Mevalonate kinase OS=Arabidopsis thaliana OX=3702 GN=At5g27450 PE=2 SV=1}	{pper:PRUPE_ppa006979mg; K00869 E2.7.1.36, MVK, mvaK1 mevalonate kinase 2.7.1.36 ko00900; Metabolism; Metabolism of terpenoids and polyketides; Terpenoid backbone biosynthesis | ko04146; Cellular Processes; Transport and catabolism; Peroxisome}	{At5g27450; KOG1511 Mevalonate kinase MVK/ERG12 I Lipid transport and metabolism ;}	{GO:0005524; ATP binding; molecular_function GO:0005739; mitochondrion; cellular_component GO:0005747; mitochondrial respiratory chain complex I; cellular_component}	{XM_017368801.1; PREDICTED: Daucus carota subsp. sativus mevalonate kinase (LOC108200591), transcript variant X2, mRNA}	{PF00288:GHMP kinases N terminal domain PF15088:NADH dehydrogenase [ubiquinone] 1 subunit C1, mitochondrial}
i1_HQ_SD_c2249/f2p2/1492	BfPMK8428	{APY22352.1; phosphomevalonate kinase, partial [Hedera helix]}	{sp|Q9C6T1|PMK_ARATH; Phosphomevalonate kinase, peroxisomal OS=Arabidopsis thaliana OX=3702 GN=PMK PE=1 SV=1}	{cit:102621350; K00938 E2.7.4.2, mvaK2 phosphomevalonate kinase 2.7.4.2 ko00900; Metabolism; Metabolism of terpenoids and polyketides; Terpenoid backbone biosynthesis}	{At1g31910; KOG4519 Phosphomevalonate kinase I Lipid transport and metabolism ;}	{GO:0005524; ATP binding; molecular_function}	{KX056073.1; Hedera helix phosphomevalonate kinase (PMVK) mRNA, partial cds}	{PF00288:GHMP kinases N terminal domain}
i1_LQ_SD_c12699/f1p2/1866	BfPMK12389	{XP_017223228.1; PREDICTED: phosphomevalonate kinase-like [Daucus carota subsp. sativus]}	{sp|Q9C6T1|PMK_ARATH; Phosphomevalonate kinase, peroxisomal OS=Arabidopsis thaliana OX=3702 GN=PMK PE=1 SV=1}	{cit:102621350; K00938 E2.7.4.2, mvaK2 phosphomevalonate kinase 2.7.4.2 ko00900; Metabolism; Metabolism of terpenoids and polyketides; Terpenoid backbone biosynthesis}	{At1g31910; KOG4519 Phosphomevalonate kinase I Lipid transport and metabolism ;}	{GO:0005524; ATP binding; molecular_function}	{XM_017374652.1; PREDICTED: Daucus carota subsp. sativus phosphomevalonate kinase-like (LOC108204952), transcript variant X1, mRNA}	{PF00288:GHMP kinases N terminal domain}
i1_LQ_SD_c20213/f1p0/1903	BfPMK14345	{XP_017223228.1; PREDICTED: phosphomevalonate kinase-like [Daucus carota subsp. sativus]}	{sp|Q9C6T1|PMK_ARATH; Phosphomevalonate kinase, peroxisomal OS=Arabidopsis thaliana OX=3702 GN=PMK PE=1 SV=1}	{cit:102621350; K00938 E2.7.4.2, mvaK2 phosphomevalonate kinase 2.7.4.2 ko00900; Metabolism; Metabolism of terpenoids and polyketides; Terpenoid backbone biosynthesis}	{At1g31910; KOG4519 Phosphomevalonate kinase I Lipid transport and metabolism ;}	{GO:0005524; ATP binding; molecular_function}	{XM_017374652.1; PREDICTED: Daucus carota subsp. sativus phosphomevalonate kinase-like (LOC108204952), transcript variant X1, mRNA}	{PF00288:GHMP kinases N terminal domain}
i1_LQ_SD_c23823/f1p20/1694	BfPMK15704	{XP_017223228.1; PREDICTED: phosphomevalonate kinase-like [Daucus carota subsp. sativus]}	{sp|Q9C6T1|PMK_ARATH; Phosphomevalonate kinase, peroxisomal OS=Arabidopsis thaliana OX=3702 GN=PMK PE=1 SV=1}	{cit:102621350; K00938 E2.7.4.2, mvaK2 phosphomevalonate kinase 2.7.4.2 ko00900; Metabolism; Metabolism of terpenoids and polyketides; Terpenoid backbone biosynthesis}	{At1g31910; KOG4519 Phosphomevalonate kinase I Lipid transport and metabolism ;}	{GO:0005524; ATP binding; molecular_function}	{XM_017374652.1; PREDICTED: Daucus carota subsp. sativus phosphomevalonate kinase-like (LOC108204952), transcript variant X1, mRNA}	{PF00288:GHMP kinases N terminal domain}
i2_LQ_SD_c112019/f1p1/2226	BfPMK37939	{XP_017223228.1; PREDICTED: phosphomevalonate kinase-like [Daucus carota subsp. sativus]}	{sp|Q9C6T1|PMK_ARATH; Phosphomevalonate kinase, peroxisomal OS=Arabidopsis thaliana OX=3702 GN=PMK PE=1 SV=1}	{pop:POPTR_0003s09680g; K00938 E2.7.4.2, mvaK2 phosphomevalonate kinase 2.7.4.2 ko00900; Metabolism; Metabolism of terpenoids and polyketides; Terpenoid backbone biosynthesis}	{At1g31910; KOG4519 Phosphomevalonate kinase I Lipid transport and metabolism ;}	{GO:0005524; ATP binding; molecular_function}	{XM_017374652.1; PREDICTED: Daucus carota subsp. sativus phosphomevalonate kinase-like (LOC108204952), transcript variant X1, mRNA}	{PF00288:GHMP kinases N terminal domain}
i2_LQ_SD_c71245/f1p1/2479	BfPMK56540	{KZN11916.1; hypothetical protein DCAR_004572 [Daucus carota subsp. sativus]}	{sp|Q9C6T1|PMK_ARATH; Phosphomevalonate kinase, peroxisomal OS=Arabidopsis thaliana OX=3702 GN=PMK PE=1 SV=1}	{cit:102621350; K00938 E2.7.4.2, mvaK2 phosphomevalonate kinase 2.7.4.2 ko00900; Metabolism; Metabolism of terpenoids and polyketides; Terpenoid backbone biosynthesis}	{At1g31910; KOG4519 Phosphomevalonate kinase I Lipid transport and metabolism ;}	{NA}	{XM_017374654.1; PREDICTED: Daucus carota subsp. sativus phosphomevalonate kinase-like (LOC108204952), transcript variant X2, mRNA}	{NA}
i3_LQ_SD_c44807/f1p4/3235	BfPMK81056	{APY22352.1; phosphomevalonate kinase, partial [Hedera helix]}	{sp|Q9C6T1|PMK_ARATH; Phosphomevalonate kinase, peroxisomal OS=Arabidopsis thaliana OX=3702 GN=PMK PE=1 SV=1}	{cit:102621350; K00938 E2.7.4.2, mvaK2 phosphomevalonate kinase 2.7.4.2 ko00900; Metabolism; Metabolism of terpenoids and polyketides; Terpenoid backbone biosynthesis}	{At1g31910; KOG4519 Phosphomevalonate kinase I Lipid transport and metabolism ;}	{NA}	{KX056073.1; Hedera helix phosphomevalonate kinase (PMVK) mRNA, partial cds}	{NA}
i4_LQ_SD_c64225/f1p0/4392	BfPMK101312	{XP_017233947.1; PREDICTED: pentatricopeptide repeat-containing protein At1g31920 [Daucus carota subsp. sativus]}	{sp|Q9C6T1|PMK_ARATH; Phosphomevalonate kinase, peroxisomal OS=Arabidopsis thaliana OX=3702 GN=PMK PE=1 SV=1}	{csv:101215176; - - - - -}	{At1g31910; KOG4519 Phosphomevalonate kinase I Lipid transport and metabolism ;}	{GO:0005524; ATP binding; molecular_function}	{KX056073.1; Hedera helix phosphomevalonate kinase (PMVK) mRNA, partial cds}	{PF00288:GHMP kinases N terminal domain}
i1_HQ_SD_c32494/f2p2/1976	BfMVD9153	{XP_017233485.1; PREDICTED: diphosphomevalonate decarboxylase MVD2 [Daucus carota subsp. sativus]}	{sp|F4JCU3|MVD2_ARATH; Diphosphomevalonate decarboxylase MVD2, peroxisomal OS=Arabidopsis thaliana OX=3702 GN=MVD2 PE=1 SV=1}	{ini:109176891; K01597 MVD, mvaD diphosphomevalonate decarboxylase 4.1.1.33 ko00900; Metabolism; Metabolism of terpenoids and polyketides; Terpenoid backbone biosynthesis}	{At3g54250; KOG2833 Mevalonate pyrophosphate decarboxylase I Lipid transport and metabolism ;}	{GO:0005737; cytoplasm; cellular_component GO:0004631; phosphomevalonate kinase activity; molecular_function GO:0006695; cholesterol biosynthetic process; biological_process}	{XM_017377996.1; PREDICTED: Daucus carota subsp. sativus diphosphomevalonate decarboxylase MVD2 (LOC108207559), mRNA}	{PF04275:Phosphomevalonate kinase }
i1_HQ_SD_c4238/f3p1/1692	BfMVD9631	{APY22355.1; diphosphomevalonate decarboxylase [Hedera helix]}	{sp|F4JCU3|MVD2_ARATH; Diphosphomevalonate decarboxylase MVD2, peroxisomal OS=Arabidopsis thaliana OX=3702 GN=MVD2 PE=1 SV=1}	{ini:109176891; K01597 MVD, mvaD diphosphomevalonate decarboxylase 4.1.1.33 ko00900; Metabolism; Metabolism of terpenoids and polyketides; Terpenoid backbone biosynthesis}	{At3g54250; KOG2833 Mevalonate pyrophosphate decarboxylase I Lipid transport and metabolism ;}	{GO:0005524; ATP binding; molecular_function GO:0004631; phosphomevalonate kinase activity; molecular_function GO:0006695; cholesterol biosynthetic process; biological_process GO:0005737; cytoplasm; cellular_component}	{XM_017377996.1; PREDICTED: Daucus carota subsp. sativus diphosphomevalonate decarboxylase MVD2 (LOC108207559), mRNA}	{PF00288:GHMP kinases N terminal domain PF04275:Phosphomevalonate kinase }
i1_LQ_SD_c15180/f1p4/1137	BfMVD13125	{XP_017233485.1; PREDICTED: diphosphomevalonate decarboxylase MVD2 [Daucus carota subsp. sativus]}	{sp|F4JCU3|MVD2_ARATH; Diphosphomevalonate decarboxylase MVD2, peroxisomal OS=Arabidopsis thaliana OX=3702 GN=MVD2 PE=1 SV=1}	{ini:109176891; K01597 MVD, mvaD diphosphomevalonate decarboxylase 4.1.1.33 ko00900; Metabolism; Metabolism of terpenoids and polyketides; Terpenoid backbone biosynthesis}	{At3g54250; KOG2833 Mevalonate pyrophosphate decarboxylase I Lipid transport and metabolism ;}	{GO:0005524; ATP binding; molecular_function}	{XM_017377996.1; PREDICTED: Daucus carota subsp. sativus diphosphomevalonate decarboxylase MVD2 (LOC108207559), mRNA}	{PF00288:GHMP kinases N terminal domain}
i1_LQ_SD_c20930/f1p2/1926	BfMVD14618	{KZN05501.1; hypothetical protein DCAR_006338 [Daucus carota subsp. sativus]}	{sp|F4JCU3|MVD2_ARATH; Diphosphomevalonate decarboxylase MVD2, peroxisomal OS=Arabidopsis thaliana OX=3702 GN=MVD2 PE=1 SV=1}	{ini:109176891; K01597 MVD, mvaD diphosphomevalonate decarboxylase 4.1.1.33 ko00900; Metabolism; Metabolism of terpenoids and polyketides; Terpenoid backbone biosynthesis}	{At3g54250; KOG2833 Mevalonate pyrophosphate decarboxylase I Lipid transport and metabolism ;}	{NA}	{XM_017377996.1; PREDICTED: Daucus carota subsp. sativus diphosphomevalonate decarboxylase MVD2 (LOC108207559), mRNA}	{NA}
i1_LQ_SD_c40194/f1p4/1716	BfMVD21185	{APY22355.1; diphosphomevalonate decarboxylase [Hedera helix]}	{sp|F4JCU3|MVD2_ARATH; Diphosphomevalonate decarboxylase MVD2, peroxisomal OS=Arabidopsis thaliana OX=3702 GN=MVD2 PE=1 SV=1}	{ini:109176891; K01597 MVD, mvaD diphosphomevalonate decarboxylase 4.1.1.33 ko00900; Metabolism; Metabolism of terpenoids and polyketides; Terpenoid backbone biosynthesis}	{At3g54250; KOG2833 Mevalonate pyrophosphate decarboxylase I Lipid transport and metabolism ;}	{GO:0006695; cholesterol biosynthetic process; biological_process GO:0004631; phosphomevalonate kinase activity; molecular_function GO:0005524; ATP binding; molecular_function GO:0005737; cytoplasm; cellular_component}	{XM_017377996.1; PREDICTED: Daucus carota subsp. sativus diphosphomevalonate decarboxylase MVD2 (LOC108207559), mRNA}	{PF04275:Phosphomevalonate kinase PF00288:GHMP kinases N terminal domain}
i1_LQ_SD_c53391/f1p3/1689	BfMVD24986	{APY22355.1; diphosphomevalonate decarboxylase [Hedera helix]}	{sp|F4JCU3|MVD2_ARATH; Diphosphomevalonate decarboxylase MVD2, peroxisomal OS=Arabidopsis thaliana OX=3702 GN=MVD2 PE=1 SV=1}	{ini:109176891; K01597 MVD, mvaD diphosphomevalonate decarboxylase 4.1.1.33 ko00900; Metabolism; Metabolism of terpenoids and polyketides; Terpenoid backbone biosynthesis}	{At3g54250; KOG2833 Mevalonate pyrophosphate decarboxylase I Lipid transport and metabolism ;}	{GO:0004631; phosphomevalonate kinase activity; molecular_function GO:0005524; ATP binding; molecular_function GO:0006695; cholesterol biosynthetic process; biological_process GO:0005737; cytoplasm; cellular_component}	{XM_017377996.1; PREDICTED: Daucus carota subsp. sativus diphosphomevalonate decarboxylase MVD2 (LOC108207559), mRNA}	{PF04275:Phosphomevalonate kinase PF00288:GHMP kinases N terminal domain}
i1_LQ_SD_c6648/f1p8/1924	BfMVD28047	{APY22355.1; diphosphomevalonate decarboxylase [Hedera helix]}	{sp|F4JCU3|MVD2_ARATH; Diphosphomevalonate decarboxylase MVD2, peroxisomal OS=Arabidopsis thaliana OX=3702 GN=MVD2 PE=1 SV=1}	{ini:109176891; K01597 MVD, mvaD diphosphomevalonate decarboxylase 4.1.1.33 ko00900; Metabolism; Metabolism of terpenoids and polyketides; Terpenoid backbone biosynthesis}	{At3g54250; KOG2833 Mevalonate pyrophosphate decarboxylase I Lipid transport and metabolism ;}	{GO:0005737; cytoplasm; cellular_component GO:0006695; cholesterol biosynthetic process; biological_process GO:0004631; phosphomevalonate kinase activity; molecular_function GO:0005524; ATP binding; molecular_function}	{XM_017377996.1; PREDICTED: Daucus carota subsp. sativus diphosphomevalonate decarboxylase MVD2 (LOC108207559), mRNA}	{PF04275:Phosphomevalonate kinase PF00288:GHMP kinases N terminal domain}
i2_LQ_SD_c31175/f1p2/2077	BfMVD45279	{APY22355.1; diphosphomevalonate decarboxylase [Hedera helix]}	{sp|F4JCU3|MVD2_ARATH; Diphosphomevalonate decarboxylase MVD2, peroxisomal OS=Arabidopsis thaliana OX=3702 GN=MVD2 PE=1 SV=1}	{ini:109176891; K01597 MVD, mvaD diphosphomevalonate decarboxylase 4.1.1.33 ko00900; Metabolism; Metabolism of terpenoids and polyketides; Terpenoid backbone biosynthesis}	{At3g54250; KOG2833 Mevalonate pyrophosphate decarboxylase I Lipid transport and metabolism ;}	{GO:0004631; phosphomevalonate kinase activity; molecular_function GO:0005524; ATP binding; molecular_function GO:0006695; cholesterol biosynthetic process; biological_process GO:0005737; cytoplasm; cellular_component}	{XM_017377996.1; PREDICTED: Daucus carota subsp. sativus diphosphomevalonate decarboxylase MVD2 (LOC108207559), mRNA}	{PF04275:Phosphomevalonate kinase PF00288:GHMP kinases N terminal domain}
i1_LQ_SD_c29464/f1p0/1023	BfDXS17605	{XP_015939107.1; PREDICTED: LOW QUALITY PROTEIN: probable 1-deoxy-D-xylulose-5-phosphate synthase, chloroplastic [Arachis duranensis]}	{sp|O78328|DXS_CAPAN; Probable 1-deoxy-D-xylulose-5-phosphate synthase, chloroplastic OS=Capsicum annuum OX=4072 GN=TKT2 PE=2 SV=1}	{adu:107464675; K01662 dxs 1-deoxy-D-xylulose-5-phosphate synthase 2.2.1.7 ko00730; Metabolism; Metabolism of cofactors and vitamins; Thiamine metabolism | ko00900; Metabolism; Metabolism of terpenoids and polyketides; Terpenoid backbone biosynthesis}	{At4g15560; KOG0523 Transketolase G Carbohydrate transport and metabolism ;}	{NA}	{XM_017371149.1; PREDICTED: Daucus carota subsp. sativus probable 1-deoxy-D-xylulose-5-phosphate synthase, chloroplastic (LOC108202654), mRNA}	{NA}
i1_LQ_SD_c7142/f1p0/1989	BfDXS28329	{XP_017237731.1; PREDICTED: probable 1-deoxy-D-xylulose-5-phosphate synthase 2, chloroplastic [Daucus carota subsp. sativus]}	{sp|Q6YU51|DXS2_ORYSJ; Probable 1-deoxy-D-xylulose-5-phosphate synthase 2, chloroplastic OS=Oryza sativa subsp. japonica OX=39947 GN=Os07g0190000 PE=2 SV=1}	{jcu:105628480; K01662 dxs 1-deoxy-D-xylulose-5-phosphate synthase 2.2.1.7 ko00730; Metabolism; Metabolism of cofactors and vitamins; Thiamine metabolism | ko00900; Metabolism; Metabolism of terpenoids and polyketides; Terpenoid backbone biosynthesis}	{At4g15560; KOG0523 Transketolase G Carbohydrate transport and metabolism ;}	{GO:0030976; thiamine pyrophosphate binding; molecular_function GO:0008661; 1-deoxy-D-xylulose-5-phosphate synthase activity; molecular_function GO:0008152; NA GO:0016114; terpenoid biosynthetic process; biological_process GO:0003824; NA GO:0016624; oxidoreductase activity, acting on the aldehyde or oxo group of donors, disulfide as acceptor; molecular_function}	{XM_017382242.1; PREDICTED: Daucus carota subsp. sativus probable 1-deoxy-D-xylulose-5-phosphate synthase 2, chloroplastic (LOC108210823), mRNA}	{PF02775:Thiamine pyrophosphate enzyme, C-terminal TPP binding domain PF13292:1-deoxy-D-xylulose-5-phosphate synthase PF00676:Dehydrogenase E1 component}
i2_HQ_SD_c118156/f2p4/2558	BfDXS30310	{XP_017247613.1; PREDICTED: probable 1-deoxy-D-xylulose-5-phosphate synthase 2, chloroplastic [Daucus carota subsp. sativus]}	{sp|Q6YU51|DXS2_ORYSJ; Probable 1-deoxy-D-xylulose-5-phosphate synthase 2, chloroplastic OS=Oryza sativa subsp. japonica OX=39947 GN=Os07g0190000 PE=2 SV=1}	{pmum:103335117; K01662 dxs 1-deoxy-D-xylulose-5-phosphate synthase 2.2.1.7 ko00730; Metabolism; Metabolism of cofactors and vitamins; Thiamine metabolism | ko00900; Metabolism; Metabolism of terpenoids and polyketides; Terpenoid backbone biosynthesis}	{At4g15560; KOG0523 Transketolase G Carbohydrate transport and metabolism ;}	{GO:0030976; thiamine pyrophosphate binding; molecular_function GO:0008661; 1-deoxy-D-xylulose-5-phosphate synthase activity; molecular_function GO:0008152; NA GO:0016624; oxidoreductase activity, acting on the aldehyde or oxo group of donors, disulfide as acceptor; molecular_function GO:0003824; NA GO:0016114; terpenoid biosynthetic process; biological_process}	{XM_017392124.1; PREDICTED: Daucus carota subsp. sativus probable 1-deoxy-D-xylulose-5-phosphate synthase 2, chloroplastic (LOC108218939), mRNA}	{PF00676:Dehydrogenase E1 component PF13292:1-deoxy-D-xylulose-5-phosphate synthase PF02775:Thiamine pyrophosphate enzyme, C-terminal TPP binding domain}
i2_HQ_SD_c4489/f5p3/2559	BfDXS33228	{XP_017237731.1; PREDICTED: probable 1-deoxy-D-xylulose-5-phosphate synthase 2, chloroplastic [Daucus carota subsp. sativus]}	{sp|Q6YU51|DXS2_ORYSJ; Probable 1-deoxy-D-xylulose-5-phosphate synthase 2, chloroplastic OS=Oryza sativa subsp. japonica OX=39947 GN=Os07g0190000 PE=2 SV=1}	{vvi:100247834; K01662 dxs 1-deoxy-D-xylulose-5-phosphate synthase 2.2.1.7 ko00730; Metabolism; Metabolism of cofactors and vitamins; Thiamine metabolism | ko00900; Metabolism; Metabolism of terpenoids and polyketides; Terpenoid backbone biosynthesis}	{At4g15560; KOG0523 Transketolase G Carbohydrate transport and metabolism ;}	{GO:0016624; oxidoreductase activity, acting on the aldehyde or oxo group of donors, disulfide as acceptor; molecular_function GO:0003824; NA GO:0016114; terpenoid biosynthetic process; biological_process GO:0008152; NA GO:0030976; thiamine pyrophosphate binding; molecular_function GO:0008661; 1-deoxy-D-xylulose-5-phosphate synthase activity; molecular_function}	{XM_017382242.1; PREDICTED: Daucus carota subsp. sativus probable 1-deoxy-D-xylulose-5-phosphate synthase 2, chloroplastic (LOC108210823), mRNA}	{PF13292:1-deoxy-D-xylulose-5-phosphate synthase PF02775:Thiamine pyrophosphate enzyme, C-terminal TPP binding domain PF00676:Dehydrogenase E1 component}
i2_HQ_SD_c52834/f2p4/2708	BfDXS33562	{XP_017247613.1; PREDICTED: probable 1-deoxy-D-xylulose-5-phosphate synthase 2, chloroplastic [Daucus carota subsp. sativus]}	{sp|Q6YU51|DXS2_ORYSJ; Probable 1-deoxy-D-xylulose-5-phosphate synthase 2, chloroplastic OS=Oryza sativa subsp. japonica OX=39947 GN=Os07g0190000 PE=2 SV=1}	{pmum:103335117; K01662 dxs 1-deoxy-D-xylulose-5-phosphate synthase 2.2.1.7 ko00730; Metabolism; Metabolism of cofactors and vitamins; Thiamine metabolism | ko00900; Metabolism; Metabolism of terpenoids and polyketides; Terpenoid backbone biosynthesis}	{At4g15560; KOG0523 Transketolase G Carbohydrate transport and metabolism ;}	{GO:0008661; 1-deoxy-D-xylulose-5-phosphate synthase activity; molecular_function GO:0030976; thiamine pyrophosphate binding; molecular_function GO:0008152; NA GO:0016624; oxidoreductase activity, acting on the aldehyde or oxo group of donors, disulfide as acceptor; molecular_function GO:0016114; terpenoid biosynthetic process; biological_process GO:0003824; NA}	{XM_017392124.1; PREDICTED: Daucus carota subsp. sativus probable 1-deoxy-D-xylulose-5-phosphate synthase 2, chloroplastic (LOC108218939), mRNA}	{PF00676:Dehydrogenase E1 component PF02775:Thiamine pyrophosphate enzyme, C-terminal TPP binding domain PF13292:1-deoxy-D-xylulose-5-phosphate synthase}
i2_HQ_SD_c56478/f2p0/2782	BfDXS33697	{XP_017214821.1; PREDICTED: probable 1-deoxy-D-xylulose-5-phosphate synthase, chloroplastic isoform X1 [Daucus carota subsp. sativus]}	{sp|O78328|DXS_CAPAN; Probable 1-deoxy-D-xylulose-5-phosphate synthase, chloroplastic OS=Capsicum annuum OX=4072 GN=TKT2 PE=2 SV=1}	{nnu:104595318; K01662 dxs 1-deoxy-D-xylulose-5-phosphate synthase 2.2.1.7 ko00730; Metabolism; Metabolism of cofactors and vitamins; Thiamine metabolism | ko00900; Metabolism; Metabolism of terpenoids and polyketides; Terpenoid backbone biosynthesis}	{At5g11380; KOG0523 Transketolase G Carbohydrate transport and metabolism ;}	{GO:0008661; 1-deoxy-D-xylulose-5-phosphate synthase activity; molecular_function GO:0050920; regulation of chemotaxis; biological_process GO:0009288; bacterial-type flagellum; cellular_component GO:0016114; terpenoid biosynthetic process; biological_process GO:0003824; NA}	{XM_017359332.1; PREDICTED: Daucus carota subsp. sativus probable 1-deoxy-D-xylulose-5-phosphate synthase, chloroplastic (LOC108192833), transcript variant X1, mRNA}	{PF13292:1-deoxy-D-xylulose-5-phosphate synthase PF04344:Chemotaxis phosphatase, CheZ}
i2_HQ_SD_c73218/f2p4/2990	BfDXS34357	{XP_017226638.1; PREDICTED: probable 1-deoxy-D-xylulose-5-phosphate synthase, chloroplastic [Daucus carota subsp. sativus]}	{sp|O78328|DXS_CAPAN; Probable 1-deoxy-D-xylulose-5-phosphate synthase, chloroplastic OS=Capsicum annuum OX=4072 GN=TKT2 PE=2 SV=1}	{cic:CICLE_v10004432mg; K01662 dxs 1-deoxy-D-xylulose-5-phosphate synthase 2.2.1.7 ko00730; Metabolism; Metabolism of cofactors and vitamins; Thiamine metabolism | ko00900; Metabolism; Metabolism of terpenoids and polyketides; Terpenoid backbone biosynthesis}	{At4g15560; KOG0523 Transketolase G Carbohydrate transport and metabolism ;}	{GO:0030976; thiamine pyrophosphate binding; molecular_function GO:0008661; 1-deoxy-D-xylulose-5-phosphate synthase activity; molecular_function GO:0016624; oxidoreductase activity, acting on the aldehyde or oxo group of donors, disulfide as acceptor; molecular_function GO:0003824; NA GO:0016114; terpenoid biosynthetic process; biological_process GO:0008152; NA}	{XM_017371149.1; PREDICTED: Daucus carota subsp. sativus probable 1-deoxy-D-xylulose-5-phosphate synthase, chloroplastic (LOC108202654), mRNA}	{PF00676:Dehydrogenase E1 component PF13292:1-deoxy-D-xylulose-5-phosphate synthase PF02775:Thiamine pyrophosphate enzyme, C-terminal TPP binding domain}
i2_HQ_SD_c73473/f2p3/2623	BfDXS34360	{XP_017237731.1; PREDICTED: probable 1-deoxy-D-xylulose-5-phosphate synthase 2, chloroplastic [Daucus carota subsp. sativus]}	{sp|Q6YU51|DXS2_ORYSJ; Probable 1-deoxy-D-xylulose-5-phosphate synthase 2, chloroplastic OS=Oryza sativa subsp. japonica OX=39947 GN=Os07g0190000 PE=2 SV=1}	{vvi:100247834; K01662 dxs 1-deoxy-D-xylulose-5-phosphate synthase 2.2.1.7 ko00730; Metabolism; Metabolism of cofactors and vitamins; Thiamine metabolism | ko00900; Metabolism; Metabolism of terpenoids and polyketides; Terpenoid backbone biosynthesis}	{At4g15560; KOG0523 Transketolase G Carbohydrate transport and metabolism ;}	{GO:0016624; oxidoreductase activity, acting on the aldehyde or oxo group of donors, disulfide as acceptor; molecular_function GO:0003824; NA GO:0016114; terpenoid biosynthetic process; biological_process GO:0008152; NA GO:0030976; thiamine pyrophosphate binding; molecular_function GO:0008661; 1-deoxy-D-xylulose-5-phosphate synthase activity; molecular_function}	{XM_017382242.1; PREDICTED: Daucus carota subsp. sativus probable 1-deoxy-D-xylulose-5-phosphate synthase 2, chloroplastic (LOC108210823), mRNA}	{PF02775:Thiamine pyrophosphate enzyme, C-terminal TPP binding domain PF13292:1-deoxy-D-xylulose-5-phosphate synthase PF00676:Dehydrogenase E1 component}
i2_HQ_SD_c8236/f8p5/2500	BfDXS34613	{XP_017226638.1; PREDICTED: probable 1-deoxy-D-xylulose-5-phosphate synthase, chloroplastic [Daucus carota subsp. sativus]}	{sp|O78328|DXS_CAPAN; Probable 1-deoxy-D-xylulose-5-phosphate synthase, chloroplastic OS=Capsicum annuum OX=4072 GN=TKT2 PE=2 SV=1}	{cann:107852315; - - - - -}	{At4g15560; KOG0523 Transketolase G Carbohydrate transport and metabolism ;}	{GO:0016114; terpenoid biosynthetic process; biological_process GO:0003824; NA GO:0016624; oxidoreductase activity, acting on the aldehyde or oxo group of donors, disulfide as acceptor; molecular_function GO:0008152; NA GO:0030976; thiamine pyrophosphate binding; molecular_function GO:0008661; 1-deoxy-D-xylulose-5-phosphate synthase activity; molecular_function}	{XM_017371149.1; PREDICTED: Daucus carota subsp. sativus probable 1-deoxy-D-xylulose-5-phosphate synthase, chloroplastic (LOC108202654), mRNA}	{PF00676:Dehydrogenase E1 component PF13292:1-deoxy-D-xylulose-5-phosphate synthase PF02775:Thiamine pyrophosphate enzyme, C-terminal TPP binding domain}
i2_HQ_SD_c83383/f11p4/2509	BfDXS34627	{XP_017247613.1; PREDICTED: probable 1-deoxy-D-xylulose-5-phosphate synthase 2, chloroplastic [Daucus carota subsp. sativus]}	{sp|Q6YU51|DXS2_ORYSJ; Probable 1-deoxy-D-xylulose-5-phosphate synthase 2, chloroplastic OS=Oryza sativa subsp. japonica OX=39947 GN=Os07g0190000 PE=2 SV=1}	{pmum:103335117; K01662 dxs 1-deoxy-D-xylulose-5-phosphate synthase 2.2.1.7 ko00730; Metabolism; Metabolism of cofactors and vitamins; Thiamine metabolism | ko00900; Metabolism; Metabolism of terpenoids and polyketides; Terpenoid backbone biosynthesis}	{At4g15560; KOG0523 Transketolase G Carbohydrate transport and metabolism ;}	{GO:0008152; NA GO:0003824; NA GO:0016114; terpenoid biosynthetic process; biological_process GO:0016624; oxidoreductase activity, acting on the aldehyde or oxo group of donors, disulfide as acceptor; molecular_function GO:0030976; thiamine pyrophosphate binding; molecular_function GO:0008661; 1-deoxy-D-xylulose-5-phosphate synthase activity; molecular_function}	{XM_017392124.1; PREDICTED: Daucus carota subsp. sativus probable 1-deoxy-D-xylulose-5-phosphate synthase 2, chloroplastic (LOC108218939), mRNA}	{PF00676:Dehydrogenase E1 component PF02775:Thiamine pyrophosphate enzyme, C-terminal TPP binding domain PF13292:1-deoxy-D-xylulose-5-phosphate synthase}
i2_HQ_SD_c85051/f24p4/2480	BfDXS34808	{XP_017247613.1; PREDICTED: probable 1-deoxy-D-xylulose-5-phosphate synthase 2, chloroplastic [Daucus carota subsp. sativus]}	{sp|Q6YU51|DXS2_ORYSJ; Probable 1-deoxy-D-xylulose-5-phosphate synthase 2, chloroplastic OS=Oryza sativa subsp. japonica OX=39947 GN=Os07g0190000 PE=2 SV=1}	{pmum:103335117; K01662 dxs 1-deoxy-D-xylulose-5-phosphate synthase 2.2.1.7 ko00730; Metabolism; Metabolism of cofactors and vitamins; Thiamine metabolism | ko00900; Metabolism; Metabolism of terpenoids and polyketides; Terpenoid backbone biosynthesis}	{At4g15560; KOG0523 Transketolase G Carbohydrate transport and metabolism ;}	{GO:0008152; NA GO:0003824; NA GO:0016114; terpenoid biosynthetic process; biological_process GO:0016624; oxidoreductase activity, acting on the aldehyde or oxo group of donors, disulfide as acceptor; molecular_function GO:0030976; thiamine pyrophosphate binding; molecular_function GO:0008661; 1-deoxy-D-xylulose-5-phosphate synthase activity; molecular_function}	{XM_017392124.1; PREDICTED: Daucus carota subsp. sativus probable 1-deoxy-D-xylulose-5-phosphate synthase 2, chloroplastic (LOC108218939), mRNA}	{PF00676:Dehydrogenase E1 component PF13292:1-deoxy-D-xylulose-5-phosphate synthase PF02775:Thiamine pyrophosphate enzyme, C-terminal TPP binding domain}
i2_LQ_SD_c118133/f10p5/2579	BfDXS38866	{XP_017226638.1; PREDICTED: probable 1-deoxy-D-xylulose-5-phosphate synthase, chloroplastic [Daucus carota subsp. sativus]}	{sp|O78328|DXS_CAPAN; Probable 1-deoxy-D-xylulose-5-phosphate synthase, chloroplastic OS=Capsicum annuum OX=4072 GN=TKT2 PE=2 SV=1}	{cann:107852315; - - - - -}	{At4g15560; KOG0523 Transketolase G Carbohydrate transport and metabolism ;}	{GO:0008661; 1-deoxy-D-xylulose-5-phosphate synthase activity; molecular_function GO:0030976; thiamine pyrophosphate binding; molecular_function GO:0008152; NA GO:0016114; terpenoid biosynthetic process; biological_process GO:0003824; NA GO:0016624; oxidoreductase activity, acting on the aldehyde or oxo group of donors, disulfide as acceptor; molecular_function}	{XM_017371149.1; PREDICTED: Daucus carota subsp. sativus probable 1-deoxy-D-xylulose-5-phosphate synthase, chloroplastic (LOC108202654), mRNA}	{PF00676:Dehydrogenase E1 component PF13292:1-deoxy-D-xylulose-5-phosphate synthase PF02775:Thiamine pyrophosphate enzyme, C-terminal TPP binding domain}
i2_LQ_SD_c122407/f1p4/2671	BfDXS39113	{XP_017247613.1; PREDICTED: probable 1-deoxy-D-xylulose-5-phosphate synthase 2, chloroplastic [Daucus carota subsp. sativus]}	{sp|Q6YU51|DXS2_ORYSJ; Probable 1-deoxy-D-xylulose-5-phosphate synthase 2, chloroplastic OS=Oryza sativa subsp. japonica OX=39947 GN=Os07g0190000 PE=2 SV=1}	{pmum:103335117; K01662 dxs 1-deoxy-D-xylulose-5-phosphate synthase 2.2.1.7 ko00730; Metabolism; Metabolism of cofactors and vitamins; Thiamine metabolism | ko00900; Metabolism; Metabolism of terpenoids and polyketides; Terpenoid backbone biosynthesis}	{At4g15560; KOG0523 Transketolase G Carbohydrate transport and metabolism ;}	{GO:0008661; 1-deoxy-D-xylulose-5-phosphate synthase activity; molecular_function GO:0030976; thiamine pyrophosphate binding; molecular_function GO:0016624; oxidoreductase activity, acting on the aldehyde or oxo group of donors, disulfide as acceptor; molecular_function GO:0003824; NA GO:0016114; terpenoid biosynthetic process; biological_process GO:0008152; NA}	{XM_017392124.1; PREDICTED: Daucus carota subsp. sativus probable 1-deoxy-D-xylulose-5-phosphate synthase 2, chloroplastic (LOC108218939), mRNA}	{PF13292:1-deoxy-D-xylulose-5-phosphate synthase PF02775:Thiamine pyrophosphate enzyme, C-terminal TPP binding domain PF00676:Dehydrogenase E1 component}
i2_LQ_SD_c18555/f1p4/2851	BfDXS40890	{XP_017247613.1; PREDICTED: probable 1-deoxy-D-xylulose-5-phosphate synthase 2, chloroplastic [Daucus carota subsp. sativus]}	{sp|Q6YU51|DXS2_ORYSJ; Probable 1-deoxy-D-xylulose-5-phosphate synthase 2, chloroplastic OS=Oryza sativa subsp. japonica OX=39947 GN=Os07g0190000 PE=2 SV=1}	{pmum:103335117; K01662 dxs 1-deoxy-D-xylulose-5-phosphate synthase 2.2.1.7 ko00730; Metabolism; Metabolism of cofactors and vitamins; Thiamine metabolism | ko00900; Metabolism; Metabolism of terpenoids and polyketides; Terpenoid backbone biosynthesis}	{At4g15560; KOG0523 Transketolase G Carbohydrate transport and metabolism ;}	{GO:0008152; NA GO:0016624; oxidoreductase activity, acting on the aldehyde or oxo group of donors, disulfide as acceptor; molecular_function GO:0016114; terpenoid biosynthetic process; biological_process GO:0003824; NA GO:0008661; 1-deoxy-D-xylulose-5-phosphate synthase activity; molecular_function GO:0030976; thiamine pyrophosphate binding; molecular_function}	{XM_017392124.1; PREDICTED: Daucus carota subsp. sativus probable 1-deoxy-D-xylulose-5-phosphate synthase 2, chloroplastic (LOC108218939), mRNA}	{PF00676:Dehydrogenase E1 component PF13292:1-deoxy-D-xylulose-5-phosphate synthase PF02775:Thiamine pyrophosphate enzyme, C-terminal TPP binding domain}
i2_LQ_SD_c19997/f1p5/2579	BfDXS41427	{XP_017226638.1; PREDICTED: probable 1-deoxy-D-xylulose-5-phosphate synthase, chloroplastic [Daucus carota subsp. sativus]}	{sp|O78328|DXS_CAPAN; Probable 1-deoxy-D-xylulose-5-phosphate synthase, chloroplastic OS=Capsicum annuum OX=4072 GN=TKT2 PE=2 SV=1}	{cann:107852315; - - - - -}	{At4g15560; KOG0523 Transketolase G Carbohydrate transport and metabolism ;}	{GO:0008661; 1-deoxy-D-xylulose-5-phosphate synthase activity; molecular_function GO:0030976; thiamine pyrophosphate binding; molecular_function GO:0016624; oxidoreductase activity, acting on the aldehyde or oxo group of donors, disulfide as acceptor; molecular_function GO:0003824; NA GO:0016114; terpenoid biosynthetic process; biological_process GO:0008152; NA}	{XM_017371149.1; PREDICTED: Daucus carota subsp. sativus probable 1-deoxy-D-xylulose-5-phosphate synthase, chloroplastic (LOC108202654), mRNA}	{PF00676:Dehydrogenase E1 component PF02775:Thiamine pyrophosphate enzyme, C-terminal TPP binding domain PF13292:1-deoxy-D-xylulose-5-phosphate synthase}
i2_LQ_SD_c2071/f4p3/2532	BfDXS41691	{XP_017237731.1; PREDICTED: probable 1-deoxy-D-xylulose-5-phosphate synthase 2, chloroplastic [Daucus carota subsp. sativus]}	{sp|Q6YU51|DXS2_ORYSJ; Probable 1-deoxy-D-xylulose-5-phosphate synthase 2, chloroplastic OS=Oryza sativa subsp. japonica OX=39947 GN=Os07g0190000 PE=2 SV=1}	{vvi:100247834; K01662 dxs 1-deoxy-D-xylulose-5-phosphate synthase 2.2.1.7 ko00730; Metabolism; Metabolism of cofactors and vitamins; Thiamine metabolism | ko00900; Metabolism; Metabolism of terpenoids and polyketides; Terpenoid backbone biosynthesis}	{At4g15560; KOG0523 Transketolase G Carbohydrate transport and metabolism ;}	{GO:0008661; 1-deoxy-D-xylulose-5-phosphate synthase activity; molecular_function GO:0030976; thiamine pyrophosphate binding; molecular_function GO:0008152; NA GO:0016114; terpenoid biosynthetic process; biological_process GO:0003824; NA GO:0016624; oxidoreductase activity, acting on the aldehyde or oxo group of donors, disulfide as acceptor; molecular_function}	{XM_017382242.1; PREDICTED: Daucus carota subsp. sativus probable 1-deoxy-D-xylulose-5-phosphate synthase 2, chloroplastic (LOC108210823), mRNA}	{PF00676:Dehydrogenase E1 component PF02775:Thiamine pyrophosphate enzyme, C-terminal TPP binding domain PF13292:1-deoxy-D-xylulose-5-phosphate synthase}
i2_LQ_SD_c34219/f1p5/2513	BfDXS45593	{XP_017226638.1; PREDICTED: probable 1-deoxy-D-xylulose-5-phosphate synthase, chloroplastic [Daucus carota subsp. sativus]}	{sp|O78328|DXS_CAPAN; Probable 1-deoxy-D-xylulose-5-phosphate synthase, chloroplastic OS=Capsicum annuum OX=4072 GN=TKT2 PE=2 SV=1}	{cann:107852315; - - - - -}	{At4g15560; KOG0523 Transketolase G Carbohydrate transport and metabolism ;}	{GO:0008661; 1-deoxy-D-xylulose-5-phosphate synthase activity; molecular_function GO:0030976; thiamine pyrophosphate binding; molecular_function GO:0016624; oxidoreductase activity, acting on the aldehyde or oxo group of donors, disulfide as acceptor; molecular_function GO:0003824; NA GO:0016114; terpenoid biosynthetic process; biological_process GO:0008152; NA}	{XM_017371149.1; PREDICTED: Daucus carota subsp. sativus probable 1-deoxy-D-xylulose-5-phosphate synthase, chloroplastic (LOC108202654), mRNA}	{PF13292:1-deoxy-D-xylulose-5-phosphate synthase PF02775:Thiamine pyrophosphate enzyme, C-terminal TPP binding domain PF00676:Dehydrogenase E1 component}
i2_LQ_SD_c60039/f1p4/2615	BfDXS54335	{XP_017226638.1; PREDICTED: probable 1-deoxy-D-xylulose-5-phosphate synthase, chloroplastic [Daucus carota subsp. sativus]}	{sp|O78328|DXS_CAPAN; Probable 1-deoxy-D-xylulose-5-phosphate synthase, chloroplastic OS=Capsicum annuum OX=4072 GN=TKT2 PE=2 SV=1}	{cann:107852315; - - - - -}	{At4g15560; KOG0523 Transketolase G Carbohydrate transport and metabolism ;}	{GO:0008152; NA GO:0016114; terpenoid biosynthetic process; biological_process GO:0003824; NA GO:0016624; oxidoreductase activity, acting on the aldehyde or oxo group of donors, disulfide as acceptor; molecular_function GO:0008661; 1-deoxy-D-xylulose-5-phosphate synthase activity; molecular_function GO:0030976; thiamine pyrophosphate binding; molecular_function}	{XM_017371149.1; PREDICTED: Daucus carota subsp. sativus probable 1-deoxy-D-xylulose-5-phosphate synthase, chloroplastic (LOC108202654), mRNA}	{PF02775:Thiamine pyrophosphate enzyme, C-terminal TPP binding domain PF13292:1-deoxy-D-xylulose-5-phosphate synthase PF00676:Dehydrogenase E1 component}
i2_LQ_SD_c75149/f1p4/2788	BfDXS58180	{XP_017226638.1; PREDICTED: probable 1-deoxy-D-xylulose-5-phosphate synthase, chloroplastic [Daucus carota subsp. sativus]}	{sp|O78328|DXS_CAPAN; Probable 1-deoxy-D-xylulose-5-phosphate synthase, chloroplastic OS=Capsicum annuum OX=4072 GN=TKT2 PE=2 SV=1}	{cic:CICLE_v10004432mg; K01662 dxs 1-deoxy-D-xylulose-5-phosphate synthase 2.2.1.7 ko00730; Metabolism; Metabolism of cofactors and vitamins; Thiamine metabolism | ko00900; Metabolism; Metabolism of terpenoids and polyketides; Terpenoid backbone biosynthesis}	{At4g15560; KOG0523 Transketolase G Carbohydrate transport and metabolism ;}	{GO:0008152; NA GO:0003824; NA GO:0016114; terpenoid biosynthetic process; biological_process GO:0016624; oxidoreductase activity, acting on the aldehyde or oxo group of donors, disulfide as acceptor; molecular_function GO:0030976; thiamine pyrophosphate binding; molecular_function GO:0008661; 1-deoxy-D-xylulose-5-phosphate synthase activity; molecular_function}	{XM_017371149.1; PREDICTED: Daucus carota subsp. sativus probable 1-deoxy-D-xylulose-5-phosphate synthase, chloroplastic (LOC108202654), mRNA}	{PF00676:Dehydrogenase E1 component PF13292:1-deoxy-D-xylulose-5-phosphate synthase PF02775:Thiamine pyrophosphate enzyme, C-terminal TPP binding domain}
i2_LQ_SD_c76626/f1p3/2583	BfDXS58804	{XP_017237731.1; PREDICTED: probable 1-deoxy-D-xylulose-5-phosphate synthase 2, chloroplastic [Daucus carota subsp. sativus]}	{sp|Q6YU51|DXS2_ORYSJ; Probable 1-deoxy-D-xylulose-5-phosphate synthase 2, chloroplastic OS=Oryza sativa subsp. japonica OX=39947 GN=Os07g0190000 PE=2 SV=1}	{jcu:105628480; K01662 dxs 1-deoxy-D-xylulose-5-phosphate synthase 2.2.1.7 ko00730; Metabolism; Metabolism of cofactors and vitamins; Thiamine metabolism | ko00900; Metabolism; Metabolism of terpenoids and polyketides; Terpenoid backbone biosynthesis}	{At4g15560; KOG0523 Transketolase G Carbohydrate transport and metabolism ;}	{NA}	{XM_017382242.1; PREDICTED: Daucus carota subsp. sativus probable 1-deoxy-D-xylulose-5-phosphate synthase 2, chloroplastic (LOC108210823), mRNA}	{NA}
i2_LQ_SD_c92585/f1p0/2994	BfDXS62495	{KZM89750.1; 1-deoxy-D-xylulose-5-phosphate synthase [Daucus carota subsp. sativus]}	{sp|O78328|DXS_CAPAN; Probable 1-deoxy-D-xylulose-5-phosphate synthase, chloroplastic OS=Capsicum annuum OX=4072 GN=TKT2 PE=2 SV=1}	{nnu:104595318; K01662 dxs 1-deoxy-D-xylulose-5-phosphate synthase 2.2.1.7 ko00730; Metabolism; Metabolism of cofactors and vitamins; Thiamine metabolism | ko00900; Metabolism; Metabolism of terpenoids and polyketides; Terpenoid backbone biosynthesis}	{At5g11380; KOG0523 Transketolase G Carbohydrate transport and metabolism ;}	{GO:0008661; 1-deoxy-D-xylulose-5-phosphate synthase activity; molecular_function GO:0016114; terpenoid biosynthetic process; biological_process}	{XM_017359332.1; PREDICTED: Daucus carota subsp. sativus probable 1-deoxy-D-xylulose-5-phosphate synthase, chloroplastic (LOC108192833), transcript variant X1, mRNA}	{PF13292:1-deoxy-D-xylulose-5-phosphate synthase}
i3_HQ_SD_c12399/f3p4/3746	BfDXS64881	{XP_017237731.1; PREDICTED: probable 1-deoxy-D-xylulose-5-phosphate synthase 2, chloroplastic [Daucus carota subsp. sativus]}	{sp|Q6YU51|DXS2_ORYSJ; Probable 1-deoxy-D-xylulose-5-phosphate synthase 2, chloroplastic OS=Oryza sativa subsp. japonica OX=39947 GN=Os07g0190000 PE=2 SV=1}	{vvi:100247834; K01662 dxs 1-deoxy-D-xylulose-5-phosphate synthase 2.2.1.7 ko00730; Metabolism; Metabolism of cofactors and vitamins; Thiamine metabolism | ko00900; Metabolism; Metabolism of terpenoids and polyketides; Terpenoid backbone biosynthesis}	{At4g15560; KOG0523 Transketolase G Carbohydrate transport and metabolism ;}	{GO:0005524; ATP binding; molecular_function GO:0016887; ATPase activity; molecular_function}	{XM_017382242.1; PREDICTED: Daucus carota subsp. sativus probable 1-deoxy-D-xylulose-5-phosphate synthase 2, chloroplastic (LOC108210823), mRNA}	{PF00005:ABC transporter}
i3_HQ_SD_c6846/f2p2/3386	BfDXS66889	{XP_017214821.1; PREDICTED: probable 1-deoxy-D-xylulose-5-phosphate synthase, chloroplastic isoform X1 [Daucus carota subsp. sativus]}	{sp|O78328|DXS_CAPAN; Probable 1-deoxy-D-xylulose-5-phosphate synthase, chloroplastic OS=Capsicum annuum OX=4072 GN=TKT2 PE=2 SV=1}	{fve:101293163; K01662 dxs 1-deoxy-D-xylulose-5-phosphate synthase 2.2.1.7 ko00730; Metabolism; Metabolism of cofactors and vitamins; Thiamine metabolism | ko00900; Metabolism; Metabolism of terpenoids and polyketides; Terpenoid backbone biosynthesis}	{At5g11380; KOG0523 Transketolase G Carbohydrate transport and metabolism ;}	{GO:0004812; aminoacyl-tRNA ligase activity; molecular_function GO:0006418; tRNA aminoacylation for protein translation; biological_process GO:0008661; 1-deoxy-D-xylulose-5-phosphate synthase activity; molecular_function GO:0005524; ATP binding; molecular_function GO:0000166; nucleotide binding; molecular_function GO:0050920; regulation of chemotaxis; biological_process GO:0003824; NA GO:0016114;…	{XM_017359332.1; PREDICTED: Daucus carota subsp. sativus probable 1-deoxy-D-xylulose-5-phosphate synthase, chloroplastic (LOC108192833), transcript variant X1, mRNA}	{PF00587:tRNA synthetase class II core domain (G, H, P, S and T) PF13292:1-deoxy-D-xylulose-5-phosphate synthase PF04344:Chemotaxis phosphatase, CheZ}
i3_LQ_SD_c11358/f1p0/3454	BfDXS67662	{XP_017226638.1; PREDICTED: probable 1-deoxy-D-xylulose-5-phosphate synthase, chloroplastic [Daucus carota subsp. sativus]}	{sp|O78328|DXS_CAPAN; Probable 1-deoxy-D-xylulose-5-phosphate synthase, chloroplastic OS=Capsicum annuum OX=4072 GN=TKT2 PE=2 SV=1}	{spen:107003373; K01662 dxs 1-deoxy-D-xylulose-5-phosphate synthase 2.2.1.7 ko00730; Metabolism; Metabolism of cofactors and vitamins; Thiamine metabolism | ko00900; Metabolism; Metabolism of terpenoids and polyketides; Terpenoid backbone biosynthesis}	{At4g15560; KOG0523 Transketolase G Carbohydrate transport and metabolism ;}	{GO:0008661; 1-deoxy-D-xylulose-5-phosphate synthase activity; molecular_function GO:0030976; thiamine pyrophosphate binding; molecular_function GO:0016114; terpenoid biosynthetic process; biological_process GO:0003824; NA GO:0016624; oxidoreductase activity, acting on the aldehyde or oxo group of donors, disulfide as acceptor; molecular_function GO:0008152; NA}	{XM_017371149.1; PREDICTED: Daucus carota subsp. sativus probable 1-deoxy-D-xylulose-5-phosphate synthase, chloroplastic (LOC108202654), mRNA}	{PF00676:Dehydrogenase E1 component PF13292:1-deoxy-D-xylulose-5-phosphate synthase PF02775:Thiamine pyrophosphate enzyme, C-terminal TPP binding domain}
i3_LQ_SD_c21662/f1p14/3383	BfDXS71081	{XP_017226638.1; PREDICTED: probable 1-deoxy-D-xylulose-5-phosphate synthase, chloroplastic [Daucus carota subsp. sativus]}	{sp|O78328|DXS_CAPAN; Probable 1-deoxy-D-xylulose-5-phosphate synthase, chloroplastic OS=Capsicum annuum OX=4072 GN=TKT2 PE=2 SV=1}	{cic:CICLE_v10004432mg; K01662 dxs 1-deoxy-D-xylulose-5-phosphate synthase 2.2.1.7 ko00730; Metabolism; Metabolism of cofactors and vitamins; Thiamine metabolism | ko00900; Metabolism; Metabolism of terpenoids and polyketides; Terpenoid backbone biosynthesis}	{At4g15560; KOG0523 Transketolase G Carbohydrate transport and metabolism ;}	{GO:0008661; 1-deoxy-D-xylulose-5-phosphate synthase activity; molecular_function GO:0030976; thiamine pyrophosphate binding; molecular_function GO:0016114; terpenoid biosynthetic process; biological_process GO:0003824; NA GO:0016624; oxidoreductase activity, acting on the aldehyde or oxo group of donors, disulfide as acceptor; molecular_function GO:0008152; NA}	{XM_017371149.1; PREDICTED: Daucus carota subsp. sativus probable 1-deoxy-D-xylulose-5-phosphate synthase, chloroplastic (LOC108202654), mRNA}	{PF13292:1-deoxy-D-xylulose-5-phosphate synthase PF02775:Thiamine pyrophosphate enzyme, C-terminal TPP binding domain PF00676:Dehydrogenase E1 component}
i3_LQ_SD_c28386/f1p2/3567	BfDXS74486	{XP_017226638.1; PREDICTED: probable 1-deoxy-D-xylulose-5-phosphate synthase, chloroplastic [Daucus carota subsp. sativus]}	{sp|O78328|DXS_CAPAN; Probable 1-deoxy-D-xylulose-5-phosphate synthase, chloroplastic OS=Capsicum annuum OX=4072 GN=TKT2 PE=2 SV=1}	{cic:CICLE_v10004432mg; K01662 dxs 1-deoxy-D-xylulose-5-phosphate synthase 2.2.1.7 ko00730; Metabolism; Metabolism of cofactors and vitamins; Thiamine metabolism | ko00900; Metabolism; Metabolism of terpenoids and polyketides; Terpenoid backbone biosynthesis}	{At4g15560; KOG0523 Transketolase G Carbohydrate transport and metabolism ;}	{GO:0008152; NA GO:0016624; oxidoreductase activity, acting on the aldehyde or oxo group of donors, disulfide as acceptor; molecular_function GO:0016114; terpenoid biosynthetic process; biological_process GO:0003824; NA GO:0030976; thiamine pyrophosphate binding; molecular_function GO:0008661; 1-deoxy-D-xylulose-5-phosphate synthase activity; molecular_function}	{XM_017371149.1; PREDICTED: Daucus carota subsp. sativus probable 1-deoxy-D-xylulose-5-phosphate synthase, chloroplastic (LOC108202654), mRNA}	{PF00676:Dehydrogenase E1 component PF13292:1-deoxy-D-xylulose-5-phosphate synthase PF02775:Thiamine pyrophosphate enzyme, C-terminal TPP binding domain}
i3_LQ_SD_c38428/f1p11/3328	BfDXS77561	{XP_017219867.1; PREDICTED: uncharacterized protein LOC108196896 [Daucus carota subsp. sativus]}	{sp|O78328|DXS_CAPAN; Probable 1-deoxy-D-xylulose-5-phosphate synthase, chloroplastic OS=Capsicum annuum OX=4072 GN=TKT2 PE=2 SV=1}	{atr:18441541; - - - - -}	{NA}	{NA}	{XM_017364378.1; PREDICTED: Daucus carota subsp. sativus uncharacterized LOC108196896 (LOC108196896), mRNA}	{NA}
i3_LQ_SD_c4104/f1p1/3252	BfDXS79007	{XP_017226638.1; PREDICTED: probable 1-deoxy-D-xylulose-5-phosphate synthase, chloroplastic [Daucus carota subsp. sativus]}	{sp|O78328|DXS_CAPAN; Probable 1-deoxy-D-xylulose-5-phosphate synthase, chloroplastic OS=Capsicum annuum OX=4072 GN=TKT2 PE=2 SV=1}	{cann:107852315; - - - - -}	{At4g15560; KOG0523 Transketolase G Carbohydrate transport and metabolism ;}	{NA}	{XM_017371149.1; PREDICTED: Daucus carota subsp. sativus probable 1-deoxy-D-xylulose-5-phosphate synthase, chloroplastic (LOC108202654), mRNA}	{NA}
i3_LQ_SD_c8294/f1p4/3371	BfDXS83491	{XP_017214821.1; PREDICTED: probable 1-deoxy-D-xylulose-5-phosphate synthase, chloroplastic isoform X1 [Daucus carota subsp. sativus]}	{sp|O78328|DXS_CAPAN; Probable 1-deoxy-D-xylulose-5-phosphate synthase, chloroplastic OS=Capsicum annuum OX=4072 GN=TKT2 PE=2 SV=1}	{fve:101293163; K01662 dxs 1-deoxy-D-xylulose-5-phosphate synthase 2.2.1.7 ko00730; Metabolism; Metabolism of cofactors and vitamins; Thiamine metabolism | ko00900; Metabolism; Metabolism of terpenoids and polyketides; Terpenoid backbone biosynthesis}	{At5g11380; KOG0523 Transketolase G Carbohydrate transport and metabolism ;}	{GO:0006418; tRNA aminoacylation for protein translation; biological_process GO:0004812; aminoacyl-tRNA ligase activity; molecular_function GO:0009288; bacterial-type flagellum; cellular_component GO:0003824; NA GO:0016114; terpenoid biosynthetic process; biological_process GO:0005524; ATP binding; molecular_function GO:0008661; 1-deoxy-D-xylulose-5-phosphate synthase activity; molecular_function…	{XM_017359332.1; PREDICTED: Daucus carota subsp. sativus probable 1-deoxy-D-xylulose-5-phosphate synthase, chloroplastic (LOC108192833), transcript variant X1, mRNA}	{PF00587:tRNA synthetase class II core domain (G, H, P, S and T) PF13292:1-deoxy-D-xylulose-5-phosphate synthase PF04344:Chemotaxis phosphatase, CheZ}
i3_LQ_SD_c9203/f1p1/3393	BfDXS83856	{XP_017226638.1; PREDICTED: probable 1-deoxy-D-xylulose-5-phosphate synthase, chloroplastic [Daucus carota subsp. sativus]}	{sp|O78328|DXS_CAPAN; Probable 1-deoxy-D-xylulose-5-phosphate synthase, chloroplastic OS=Capsicum annuum OX=4072 GN=TKT2 PE=2 SV=1}	{cam:101495911; K01662 dxs 1-deoxy-D-xylulose-5-phosphate synthase 2.2.1.7 ko00730; Metabolism; Metabolism of cofactors and vitamins; Thiamine metabolism | ko00900; Metabolism; Metabolism of terpenoids and polyketides; Terpenoid backbone biosynthesis}	{At4g15560; KOG0523 Transketolase G Carbohydrate transport and metabolism ;}	{GO:0008661; 1-deoxy-D-xylulose-5-phosphate synthase activity; molecular_function GO:0030976; thiamine pyrophosphate binding; molecular_function GO:0016624; oxidoreductase activity, acting on the aldehyde or oxo group of donors, disulfide as acceptor; molecular_function GO:0016114; terpenoid biosynthetic process; biological_process GO:0003824; NA GO:0008152; NA}	{XM_017371149.1; PREDICTED: Daucus carota subsp. sativus probable 1-deoxy-D-xylulose-5-phosphate synthase, chloroplastic (LOC108202654), mRNA}	{PF02775:Thiamine pyrophosphate enzyme, C-terminal TPP binding domain PF13292:1-deoxy-D-xylulose-5-phosphate synthase PF00676:Dehydrogenase E1 component}
i4_LQ_SD_c63504/f1p1/4825	BfDXS101036	{XP_017226638.1; PREDICTED: probable 1-deoxy-D-xylulose-5-phosphate synthase, chloroplastic [Daucus carota subsp. sativus]}	{sp|O78328|DXS_CAPAN; Probable 1-deoxy-D-xylulose-5-phosphate synthase, chloroplastic OS=Capsicum annuum OX=4072 GN=TKT2 PE=2 SV=1}	{cam:101495911; K01662 dxs 1-deoxy-D-xylulose-5-phosphate synthase 2.2.1.7 ko00730; Metabolism; Metabolism of cofactors and vitamins; Thiamine metabolism | ko00900; Metabolism; Metabolism of terpenoids and polyketides; Terpenoid backbone biosynthesis}	{At4g15560; KOG0523 Transketolase G Carbohydrate transport and metabolism ;}	{GO:0008152; NA GO:0016624; oxidoreductase activity, acting on the aldehyde or oxo group of donors, disulfide as acceptor; molecular_function GO:0003824; NA GO:0016114; terpenoid biosynthetic process; biological_process GO:0030976; thiamine pyrophosphate binding; molecular_function GO:0008661; 1-deoxy-D-xylulose-5-phosphate synthase activity; molecular_function}	{XM_017371149.1; PREDICTED: Daucus carota subsp. sativus probable 1-deoxy-D-xylulose-5-phosphate synthase, chloroplastic (LOC108202654), mRNA}	{PF02775:Thiamine pyrophosphate enzyme, C-terminal TPP binding domain PF13292:1-deoxy-D-xylulose-5-phosphate synthase PF00676:Dehydrogenase E1 component}
i4_LQ_SD_c79693/f1p1/4564	BfDXS104984	{XP_017226638.1; PREDICTED: probable 1-deoxy-D-xylulose-5-phosphate synthase, chloroplastic [Daucus carota subsp. sativus]}	{sp|O78328|DXS_CAPAN; Probable 1-deoxy-D-xylulose-5-phosphate synthase, chloroplastic OS=Capsicum annuum OX=4072 GN=TKT2 PE=2 SV=1}	{cam:101495911; K01662 dxs 1-deoxy-D-xylulose-5-phosphate synthase 2.2.1.7 ko00730; Metabolism; Metabolism of cofactors and vitamins; Thiamine metabolism | ko00900; Metabolism; Metabolism of terpenoids and polyketides; Terpenoid backbone biosynthesis}	{At4g15560; KOG0523 Transketolase G Carbohydrate transport and metabolism ;}	{GO:0008152; NA GO:0016624; oxidoreductase activity, acting on the aldehyde or oxo group of donors, disulfide as acceptor; molecular_function GO:0003824; NA GO:0016114; terpenoid biosynthetic process; biological_process GO:0008661; 1-deoxy-D-xylulose-5-phosphate synthase activity; molecular_function GO:0030976; thiamine pyrophosphate binding; molecular_function}	{XM_017371149.1; PREDICTED: Daucus carota subsp. sativus probable 1-deoxy-D-xylulose-5-phosphate synthase, chloroplastic (LOC108202654), mRNA}	{PF02775:Thiamine pyrophosphate enzyme, C-terminal TPP binding domain PF13292:1-deoxy-D-xylulose-5-phosphate synthase PF00676:Dehydrogenase E1 component}
i1_LQ_SD_c23741/f1p1/1936	BfDXR15673	{AJW77397.1; 1-deoxy-D-xylulose 5-phosphate reductoisomerase [Angelica sinensis]}	{sp|Q8W250|DXR_ORYSJ; 1-deoxy-D-xylulose 5-phosphate reductoisomerase, chloroplastic OS=Oryza sativa subsp. japonica OX=39947 GN=DXR PE=2 SV=2}	{egr:104418154; K00099 dxr 1-deoxy-D-xylulose-5-phosphate reductoisomerase 1.1.1.267 ko00900; Metabolism; Metabolism of terpenoids and polyketides; Terpenoid backbone biosynthesis}	{NA}	{GO:0005515; protein binding; molecular_function}	{KP057204.1; Angelica sinensis 1-deoxy-D-xylulose 5-phosphate reductoisomerase mRNA, complete cds}	{PF08436:1-deoxy-D-xylulose 5-phosphate reductoisomerase C-terminal}
i1_LQ_SD_c38543/f1p61/1841	BfDXR20454	{XP_017219432.1; PREDICTED: 1-deoxy-D-xylulose 5-phosphate reductoisomerase, chloroplastic [Daucus carota subsp. sativus]}	{sp|Q8W250|DXR_ORYSJ; 1-deoxy-D-xylulose 5-phosphate reductoisomerase, chloroplastic OS=Oryza sativa subsp. japonica OX=39947 GN=DXR PE=2 SV=2}	{aip:107634999; K00099 dxr 1-deoxy-D-xylulose-5-phosphate reductoisomerase 1.1.1.267 ko00900; Metabolism; Metabolism of terpenoids and polyketides; Terpenoid backbone biosynthesis}	{NA}	{GO:0070402; NADPH binding; molecular_function GO:0016620; oxidoreductase activity, acting on the aldehyde or oxo group of donors, NAD or NADP as acceptor; molecular_function GO:0051287; NAD binding; molecular_function GO:0050661; NADP binding; molecular_function GO:0055114; oxidation-reduction process; biological_process GO:0016491; oxidoreductase activity; molecular_function}	{KP057204.1; Angelica sinensis 1-deoxy-D-xylulose 5-phosphate reductoisomerase mRNA, complete cds}	{PF03447:Homoserine dehydrogenase, NAD binding domain PF02670:1-deoxy-D-xylulose 5-phosphate reductoisomerase PF01118:Semialdehyde dehydrogenase, NAD binding domain}
i1_LQ_SD_c57648/f1p0/1948	BfDXR26858	{XP_017219432.1; PREDICTED: 1-deoxy-D-xylulose 5-phosphate reductoisomerase, chloroplastic [Daucus carota subsp. sativus]}	{sp|Q9XFS9|DXR_ARATH; 1-deoxy-D-xylulose 5-phosphate reductoisomerase, chloroplastic OS=Arabidopsis thaliana OX=3702 GN=DXR PE=2 SV=2}	{sot:102596520; K00099 dxr 1-deoxy-D-xylulose-5-phosphate reductoisomerase 1.1.1.267 ko00900; Metabolism; Metabolism of terpenoids and polyketides; Terpenoid backbone biosynthesis}	{NA}	{GO:0070402; NADPH binding; molecular_function GO:0050661; NADP binding; molecular_function GO:0016620; oxidoreductase activity, acting on the aldehyde or oxo group of donors, NAD or NADP as acceptor; molecular_function GO:0051287; NAD binding; molecular_function GO:0005515; protein binding; molecular_function GO:0055114; oxidation-reduction process; biological_process GO:0016491; oxidoreductase …	{KP057204.1; Angelica sinensis 1-deoxy-D-xylulose 5-phosphate reductoisomerase mRNA, complete cds}	{PF03447:Homoserine dehydrogenase, NAD binding domain PF02670:1-deoxy-D-xylulose 5-phosphate reductoisomerase PF01118:Semialdehyde dehydrogenase, NAD binding domain PF08436:1-deoxy-D-xylulose 5-phosphate reductoisomerase C-terminal}
i2_LQ_SD_c125611/f1p4/2019	BfDXR39412	{XP_017219432.1; PREDICTED: 1-deoxy-D-xylulose 5-phosphate reductoisomerase, chloroplastic [Daucus carota subsp. sativus]}	{sp|Q9XFS9|DXR_ARATH; 1-deoxy-D-xylulose 5-phosphate reductoisomerase, chloroplastic OS=Arabidopsis thaliana OX=3702 GN=DXR PE=2 SV=2}	{sot:102596520; K00099 dxr 1-deoxy-D-xylulose-5-phosphate reductoisomerase 1.1.1.267 ko00900; Metabolism; Metabolism of terpenoids and polyketides; Terpenoid backbone biosynthesis}	{NA}	{GO:0051287; NAD binding; molecular_function GO:0016620; oxidoreductase activity, acting on the aldehyde or oxo group of donors, NAD or NADP as acceptor; molecular_function GO:0050661; NADP binding; molecular_function GO:0070402; NADPH binding; molecular_function GO:0016491; oxidoreductase activity; molecular_function GO:0055114; oxidation-reduction process; biological_process GO:0005515; protein…	{KP057204.1; Angelica sinensis 1-deoxy-D-xylulose 5-phosphate reductoisomerase mRNA, complete cds}	{PF02670:1-deoxy-D-xylulose 5-phosphate reductoisomerase PF03447:Homoserine dehydrogenase, NAD binding domain PF08436:1-deoxy-D-xylulose 5-phosphate reductoisomerase C-terminal PF01118:Semialdehyde dehydrogenase, NAD binding domain}
i2_LQ_SD_c14447/f1p4/2218	BfDXR40274	{XP_017219432.1; PREDICTED: 1-deoxy-D-xylulose 5-phosphate reductoisomerase, chloroplastic [Daucus carota subsp. sativus]}	{sp|Q9XFS9|DXR_ARATH; 1-deoxy-D-xylulose 5-phosphate reductoisomerase, chloroplastic OS=Arabidopsis thaliana OX=3702 GN=DXR PE=2 SV=2}	{sot:102596520; K00099 dxr 1-deoxy-D-xylulose-5-phosphate reductoisomerase 1.1.1.267 ko00900; Metabolism; Metabolism of terpenoids and polyketides; Terpenoid backbone biosynthesis}	{NA}	{GO:0055114; oxidation-reduction process; biological_process GO:0016491; oxidoreductase activity; molecular_function GO:0005515; protein binding; molecular_function GO:0070402; NADPH binding; molecular_function GO:0050661; NADP binding; molecular_function GO:0051287; NAD binding; molecular_function GO:0016620; oxidoreductase activity, acting on the aldehyde or oxo group of donors, NAD or NADP as …	{KP057204.1; Angelica sinensis 1-deoxy-D-xylulose 5-phosphate reductoisomerase mRNA, complete cds}	{PF02670:1-deoxy-D-xylulose 5-phosphate reductoisomerase PF03447:Homoserine dehydrogenase, NAD binding domain PF08436:1-deoxy-D-xylulose 5-phosphate reductoisomerase C-terminal PF01118:Semialdehyde dehydrogenase, NAD binding domain}
i2_LQ_SD_c27284/f1p4/2767	BfDXR44155	{XP_017219432.1; PREDICTED: 1-deoxy-D-xylulose 5-phosphate reductoisomerase, chloroplastic [Daucus carota subsp. sativus]}	{sp|Q9XFS9|DXR_ARATH; 1-deoxy-D-xylulose 5-phosphate reductoisomerase, chloroplastic OS=Arabidopsis thaliana OX=3702 GN=DXR PE=2 SV=2}	{sot:102596520; K00099 dxr 1-deoxy-D-xylulose-5-phosphate reductoisomerase 1.1.1.267 ko00900; Metabolism; Metabolism of terpenoids and polyketides; Terpenoid backbone biosynthesis}	{NA}	{GO:0050661; NADP binding; molecular_function GO:0051287; NAD binding; molecular_function GO:0016620; oxidoreductase activity, acting on the aldehyde or oxo group of donors, NAD or NADP as acceptor; molecular_function GO:0070402; NADPH binding; molecular_function GO:0005515; protein binding; molecular_function GO:0016491; oxidoreductase activity; molecular_function GO:0055114; oxidation-reduction…	{KP057204.1; Angelica sinensis 1-deoxy-D-xylulose 5-phosphate reductoisomerase mRNA, complete cds}	{PF03447:Homoserine dehydrogenase, NAD binding domain PF02670:1-deoxy-D-xylulose 5-phosphate reductoisomerase PF01118:Semialdehyde dehydrogenase, NAD binding domain PF08436:1-deoxy-D-xylulose 5-phosphate reductoisomerase C-terminal}
i2_LQ_SD_c56279/f1p4/2586	BfDXR52669	{AJW77397.1; 1-deoxy-D-xylulose 5-phosphate reductoisomerase [Angelica sinensis]}	{sp|Q9XFS9|DXR_ARATH; 1-deoxy-D-xylulose 5-phosphate reductoisomerase, chloroplastic OS=Arabidopsis thaliana OX=3702 GN=DXR PE=2 SV=2}	{spen:107014579; K00099 dxr 1-deoxy-D-xylulose-5-phosphate reductoisomerase 1.1.1.267 ko00900; Metabolism; Metabolism of terpenoids and polyketides; Terpenoid backbone biosynthesis}	{NA}	{GO:0016491; oxidoreductase activity; molecular_function GO:0055114; oxidation-reduction process; biological_process GO:0051287; NAD binding; molecular_function GO:0050661; NADP binding; molecular_function GO:0016620; oxidoreductase activity, acting on the aldehyde or oxo group of donors, NAD or NADP as acceptor; molecular_function GO:0070402; NADPH binding; molecular_function}	{KP057204.1; Angelica sinensis 1-deoxy-D-xylulose 5-phosphate reductoisomerase mRNA, complete cds}	{PF02670:1-deoxy-D-xylulose 5-phosphate reductoisomerase PF03447:Homoserine dehydrogenase, NAD binding domain PF01118:Semialdehyde dehydrogenase, NAD binding domain}
i2_LQ_SD_c57724/f1p7/2261	BfDXR53323	{XP_017219432.1; PREDICTED: 1-deoxy-D-xylulose 5-phosphate reductoisomerase, chloroplastic [Daucus carota subsp. sativus]}	{sp|Q9XFS9|DXR_ARATH; 1-deoxy-D-xylulose 5-phosphate reductoisomerase, chloroplastic OS=Arabidopsis thaliana OX=3702 GN=DXR PE=2 SV=2}	{sot:102596520; K00099 dxr 1-deoxy-D-xylulose-5-phosphate reductoisomerase 1.1.1.267 ko00900; Metabolism; Metabolism of terpenoids and polyketides; Terpenoid backbone biosynthesis}	{NA}	{GO:0050661; NADP binding; molecular_function GO:0016620; oxidoreductase activity, acting on the aldehyde or oxo group of donors, NAD or NADP as acceptor; molecular_function GO:0051287; NAD binding; molecular_function GO:0070402; NADPH binding; molecular_function GO:0016491; oxidoreductase activity; molecular_function GO:0055114; oxidation-reduction process; biological_process GO:0005515; protein…	{KT983258.1; Bupleurum latissimum chloroplast, complete genome}	{PF01118:Semialdehyde dehydrogenase, NAD binding domain PF08436:1-deoxy-D-xylulose 5-phosphate reductoisomerase C-terminal PF03447:Homoserine dehydrogenase, NAD binding domain PF02670:1-deoxy-D-xylulose 5-phosphate reductoisomerase}
i2_LQ_SD_c81125/f1p4/2104	BfDXR59721	{XP_017219432.1; PREDICTED: 1-deoxy-D-xylulose 5-phosphate reductoisomerase, chloroplastic [Daucus carota subsp. sativus]}	{sp|Q9XFS9|DXR_ARATH; 1-deoxy-D-xylulose 5-phosphate reductoisomerase, chloroplastic OS=Arabidopsis thaliana OX=3702 GN=DXR PE=2 SV=2}	{sot:102596520; K00099 dxr 1-deoxy-D-xylulose-5-phosphate reductoisomerase 1.1.1.267 ko00900; Metabolism; Metabolism of terpenoids and polyketides; Terpenoid backbone biosynthesis}	{NA}	{GO:0016620; oxidoreductase activity, acting on the aldehyde or oxo group of donors, NAD or NADP as acceptor; molecular_function GO:0050661; NADP binding; molecular_function GO:0051287; NAD binding; molecular_function GO:0070402; NADPH binding; molecular_function GO:0005515; protein binding; molecular_function GO:0016491; oxidoreductase activity; molecular_function GO:0055114; oxidation-reduction…	{KP057204.1; Angelica sinensis 1-deoxy-D-xylulose 5-phosphate reductoisomerase mRNA, complete cds}	{PF03447:Homoserine dehydrogenase, NAD binding domain PF02670:1-deoxy-D-xylulose 5-phosphate reductoisomerase PF01118:Semialdehyde dehydrogenase, NAD binding domain PF08436:1-deoxy-D-xylulose 5-phosphate reductoisomerase C-terminal}
i2_LQ_SD_c99833/f1p4/2073	BfDXR64694	{XP_017219432.1; PREDICTED: 1-deoxy-D-xylulose 5-phosphate reductoisomerase, chloroplastic [Daucus carota subsp. sativus]}	{sp|Q8W250|DXR_ORYSJ; 1-deoxy-D-xylulose 5-phosphate reductoisomerase, chloroplastic OS=Oryza sativa subsp. japonica OX=39947 GN=DXR PE=2 SV=2}	{spen:107014579; K00099 dxr 1-deoxy-D-xylulose-5-phosphate reductoisomerase 1.1.1.267 ko00900; Metabolism; Metabolism of terpenoids and polyketides; Terpenoid backbone biosynthesis}	{NA}	{GO:0070402; NADPH binding; molecular_function GO:0050661; NADP binding; molecular_function GO:0016620; oxidoreductase activity, acting on the aldehyde or oxo group of donors, NAD or NADP as acceptor; molecular_function GO:0051287; NAD binding; molecular_function GO:0005515; protein binding; molecular_function GO:0055114; oxidation-reduction process; biological_process GO:0016491; oxidoreductase …	{KP057204.1; Angelica sinensis 1-deoxy-D-xylulose 5-phosphate reductoisomerase mRNA, complete cds}	{PF01118:Semialdehyde dehydrogenase, NAD binding domain PF08436:1-deoxy-D-xylulose 5-phosphate reductoisomerase C-terminal PF03447:Homoserine dehydrogenase, NAD binding domain PF02670:1-deoxy-D-xylulose 5-phosphate reductoisomerase}
i3_LQ_SD_c4046/f1p0/3671	BfDXR78667	{XP_010483992.1; PREDICTED: 1-deoxy-D-xylulose 5-phosphate reductoisomerase, chloroplastic [Camelina sativa]}	{sp|Q9XFS9|DXR_ARATH; 1-deoxy-D-xylulose 5-phosphate reductoisomerase, chloroplastic OS=Arabidopsis thaliana OX=3702 GN=DXR PE=2 SV=2}	{eus:EUTSA_v10004122mg; K00099 dxr 1-deoxy-D-xylulose-5-phosphate reductoisomerase 1.1.1.267 ko00900; Metabolism; Metabolism of terpenoids and polyketides; Terpenoid backbone biosynthesis}	{NA}	{GO:0070402; NADPH binding; molecular_function GO:0050661; NADP binding; molecular_function GO:0016620; oxidoreductase activity, acting on the aldehyde or oxo group of donors, NAD or NADP as acceptor; molecular_function GO:0051287; NAD binding; molecular_function GO:0055114; oxidation-reduction process; biological_process GO:0016491; oxidoreductase activity; molecular_function}	{KP057204.1; Angelica sinensis 1-deoxy-D-xylulose 5-phosphate reductoisomerase mRNA, complete cds}	{PF01118:Semialdehyde dehydrogenase, NAD binding domain PF02670:1-deoxy-D-xylulose 5-phosphate reductoisomerase PF03447:Homoserine dehydrogenase, NAD binding domain}
i3_LQ_SD_c4944/f1p0/3336	BfDXR81808	{APY22342.1; 1-deoxy-D-xylulose-5-phosphate reductase, partial [Hedera helix]}	{sp|Q8W250|DXR_ORYSJ; 1-deoxy-D-xylulose 5-phosphate reductoisomerase, chloroplastic OS=Oryza sativa subsp. japonica OX=39947 GN=DXR PE=2 SV=2}	{egr:104418154; K00099 dxr 1-deoxy-D-xylulose-5-phosphate reductoisomerase 1.1.1.267 ko00900; Metabolism; Metabolism of terpenoids and polyketides; Terpenoid backbone biosynthesis}	{NA}	{GO:0016620; oxidoreductase activity, acting on the aldehyde or oxo group of donors, NAD or NADP as acceptor; molecular_function GO:0050661; NADP binding; molecular_function GO:0051287; NAD binding; molecular_function GO:0070402; NADPH binding; molecular_function GO:0016491; oxidoreductase activity; molecular_function GO:0055114; oxidation-reduction process; biological_process}	{XM_017363943.1; PREDICTED: Daucus carota subsp. sativus 1-deoxy-D-xylulose 5-phosphate reductoisomerase, chloroplastic (LOC108196592), mRNA}	{PF02670:1-deoxy-D-xylulose 5-phosphate reductoisomerase PF03447:Homoserine dehydrogenase, NAD binding domain PF01118:Semialdehyde dehydrogenase, NAD binding domain}
i2_LQ_SD_c106723/f1p0/2384	BfCMS35941	{APY22343.1; 2-C-methyl-D-erythritol 4-phosphate cytidylyltransferase, partial [Hedera helix]}	{sp|P69834|ISPD_ARATH; 2-C-methyl-D-erythritol 4-phosphate cytidylyltransferase, chloroplastic OS=Arabidopsis thaliana OX=3702 GN=ISPD PE=1 SV=1}	{nta:107768615; - - - - -}	{NA}	{NA}	{XM_017386317.1; PREDICTED: Daucus carota subsp. sativus 2-C-methyl-D-erythritol 4-phosphate cytidylyltransferase, chloroplastic (LOC108214287), transcript variant X2, mRNA}	{NA}
i1_LQ_SD_c37677/f1p1/1525	BfCMK20095	{KZN05490.1; 4-(cytidine 5-phospho)-2-C-methyl-D-erithritol kinase [Daucus carota subsp. sativus]}	{sp|P93841|ISPE_SOLLC; 4-diphosphocytidyl-2-C-methyl-D-erythritol kinase, chloroplastic/chromoplastic (Fragment) OS=Solanum lycopersicum OX=4081 GN=ISPE PE=1 SV=1}	{spen:107008194; K00919 ispE 4-diphosphocytidyl-2-C-methyl-D-erythritol kinase 2.7.1.148 ko00900; Metabolism; Metabolism of terpenoids and polyketides; Terpenoid backbone biosynthesis}	{NA}	{NA}	{XM_017376241.1; PREDICTED: Daucus carota subsp. sativus 4-diphosphocytidyl-2-C-methyl-D-erythritol kinase, chloroplastic/chromoplastic (LOC108206067), mRNA}	{NA}
i1_LQ_SD_c53496/f1p0/1559	BfCMK25031	{XP_017231730.1; PREDICTED: 4-diphosphocytidyl-2-C-methyl-D-erythritol kinase, chloroplastic/chromoplastic [Daucus carota subsp. sativus]}	{sp|P93841|ISPE_SOLLC; 4-diphosphocytidyl-2-C-methyl-D-erythritol kinase, chloroplastic/chromoplastic (Fragment) OS=Solanum lycopersicum OX=4081 GN=ISPE PE=1 SV=1}	{spen:107008194; K00919 ispE 4-diphosphocytidyl-2-C-methyl-D-erythritol kinase 2.7.1.148 ko00900; Metabolism; Metabolism of terpenoids and polyketides; Terpenoid backbone biosynthesis}	{NA}	{GO:0005524; ATP binding; molecular_function}	{XM_017376241.1; PREDICTED: Daucus carota subsp. sativus 4-diphosphocytidyl-2-C-methyl-D-erythritol kinase, chloroplastic/chromoplastic (LOC108206067), mRNA}	{PF00288:GHMP kinases N terminal domain}
i1_LQ_SD_c57432/f1p1/1593	BfCMK26757	{XP_017231730.1; PREDICTED: 4-diphosphocytidyl-2-C-methyl-D-erythritol kinase, chloroplastic/chromoplastic [Daucus carota subsp. sativus]}	{sp|P93841|ISPE_SOLLC; 4-diphosphocytidyl-2-C-methyl-D-erythritol kinase, chloroplastic/chromoplastic (Fragment) OS=Solanum lycopersicum OX=4081 GN=ISPE PE=1 SV=1}	{spen:107008194; K00919 ispE 4-diphosphocytidyl-2-C-methyl-D-erythritol kinase 2.7.1.148 ko00900; Metabolism; Metabolism of terpenoids and polyketides; Terpenoid backbone biosynthesis}	{NA}	{GO:0005524; ATP binding; molecular_function}	{XM_017376241.1; PREDICTED: Daucus carota subsp. sativus 4-diphosphocytidyl-2-C-methyl-D-erythritol kinase, chloroplastic/chromoplastic (LOC108206067), mRNA}	{PF00288:GHMP kinases N terminal domain}
i2_LQ_SD_c25693/f1p0/2726	BfCMK43531	{XP_017231730.1; PREDICTED: 4-diphosphocytidyl-2-C-methyl-D-erythritol kinase, chloroplastic/chromoplastic [Daucus carota subsp. sativus]}	{sp|P93841|ISPE_SOLLC; 4-diphosphocytidyl-2-C-methyl-D-erythritol kinase, chloroplastic/chromoplastic (Fragment) OS=Solanum lycopersicum OX=4081 GN=ISPE PE=1 SV=1}	{spen:107008194; K00919 ispE 4-diphosphocytidyl-2-C-methyl-D-erythritol kinase 2.7.1.148 ko00900; Metabolism; Metabolism of terpenoids and polyketides; Terpenoid backbone biosynthesis}	{NA}	{GO:0005524; ATP binding; molecular_function}	{XM_017376241.1; PREDICTED: Daucus carota subsp. sativus 4-diphosphocytidyl-2-C-methyl-D-erythritol kinase, chloroplastic/chromoplastic (LOC108206067), mRNA}	{PF00288:GHMP kinases N terminal domain}
i2_LQ_SD_c52266/f1p0/2525	BfCMK51038	{XP_017231730.1; PREDICTED: 4-diphosphocytidyl-2-C-methyl-D-erythritol kinase, chloroplastic/chromoplastic [Daucus carota subsp. sativus]}	{sp|P93841|ISPE_SOLLC; 4-diphosphocytidyl-2-C-methyl-D-erythritol kinase, chloroplastic/chromoplastic (Fragment) OS=Solanum lycopersicum OX=4081 GN=ISPE PE=1 SV=1}	{spen:107008194; K00919 ispE 4-diphosphocytidyl-2-C-methyl-D-erythritol kinase 2.7.1.148 ko00900; Metabolism; Metabolism of terpenoids and polyketides; Terpenoid backbone biosynthesis}	{NA}	{GO:0005524; ATP binding; molecular_function}	{XM_017376241.1; PREDICTED: Daucus carota subsp. sativus 4-diphosphocytidyl-2-C-methyl-D-erythritol kinase, chloroplastic/chromoplastic (LOC108206067), mRNA}	{PF00288:GHMP kinases N terminal domain}
i0_LQ_SD_c6374/f1p1/946	BfMCS5942	{XP_017231710.1; PREDICTED: 2-C-methyl-D-erythritol 2,4-cyclodiphosphate synthase, chloroplastic [Daucus carota subsp. sativus]}	{sp|Q9CAK8|ISPF_ARATH; 2-C-methyl-D-erythritol 2,4-cyclodiphosphate synthase, chloroplastic OS=Arabidopsis thaliana OX=3702 GN=ISPF PE=1 SV=1}	{pop:POPTR_0003s13230g; K01770 ispF 2-C-methyl-D-erythritol 2,4-cyclodiphosphate synthase 4.6.1.12 ko00900; Metabolism; Metabolism of terpenoids and polyketides; Terpenoid backbone biosynthesis}	{NA}	{GO:0008685; 2-C-methyl-D-erythritol 2,4-cyclodiphosphate synthase activity; molecular_function GO:0016114; terpenoid biosynthetic process; biological_process}	{XM_017376221.1; PREDICTED: Daucus carota subsp. sativus 2-C-methyl-D-erythritol 2,4-cyclodiphosphate synthase, chloroplastic (LOC108206051), mRNA}	{PF02542:YgbB family}
i2_LQ_SD_c51523/f1p0/2571	BfMCS50752	{NP_001289517.1; 2-C-methyl-D-erythritol 2,4-cyclodiphosphate synthase, chloroplastic [Nicotiana sylvestris]}	{sp|Q9CAK8|ISPF_ARATH; 2-C-methyl-D-erythritol 2,4-cyclodiphosphate synthase, chloroplastic OS=Arabidopsis thaliana OX=3702 GN=ISPF PE=1 SV=1}	{pop:POPTR_0003s13230g; K01770 ispF 2-C-methyl-D-erythritol 2,4-cyclodiphosphate synthase 4.6.1.12 ko00900; Metabolism; Metabolism of terpenoids and polyketides; Terpenoid backbone biosynthesis}	{NA}	{GO:0016114; terpenoid biosynthetic process; biological_process GO:0008685; 2-C-methyl-D-erythritol 2,4-cyclodiphosphate synthase activity; molecular_function}	{XM_017376221.1; PREDICTED: Daucus carota subsp. sativus 2-C-methyl-D-erythritol 2,4-cyclodiphosphate synthase, chloroplastic (LOC108206051), mRNA}	{PF02542:YgbB family}
i1_HQ_SD_c20275/f2p2/1967	BfHDS8218	{XP_017235881.1; PREDICTED: 4-hydroxy-3-methylbut-2-en-1-yl diphosphate synthase (ferredoxin), chloroplastic [Daucus carota subsp. sativus]}	{sp|F4K0E8|ISPG_ARATH; 4-hydroxy-3-methylbut-2-en-1-yl diphosphate synthase (ferredoxin), chloroplastic OS=Arabidopsis thaliana OX=3702 GN=ISPG PE=1 SV=1}	{sot:102591285; K03526 gcpE, ispG (E)-4-hydroxy-3-methylbut-2-enyl-diphosphate synthase [EC:1.17.7.1 1.17.7.3] 1.17.7.1,1.17.7.3 ko00900; Metabolism; Metabolism of terpenoids and polyketides; Terpenoid backbone biosynthesis}	{NA}	{GO:0055114; oxidation-reduction process; biological_process GO:0016114; terpenoid biosynthetic process; biological_process GO:0046429; 4-hydroxy-3-methylbut-2-en-1-yl diphosphate synthase activity; molecular_function}	{XM_017380393.1; PREDICTED: Daucus carota subsp. sativus 4-hydroxy-3-methylbut-2-en-1-yl diphosphate synthase (ferredoxin), chloroplastic (LOC108209472), transcript variant X2, mRNA}	{PF04551:GcpE protein}
i1_LQ_SD_c37946/f1p0/1844	BfHDS20195	{XP_017235881.1; PREDICTED: 4-hydroxy-3-methylbut-2-en-1-yl diphosphate synthase (ferredoxin), chloroplastic [Daucus carota subsp. sativus]}	{sp|F4K0E8|ISPG_ARATH; 4-hydroxy-3-methylbut-2-en-1-yl diphosphate synthase (ferredoxin), chloroplastic OS=Arabidopsis thaliana OX=3702 GN=ISPG PE=1 SV=1}	{crb:CARUB_v10025946mg; K03526 gcpE, ispG (E)-4-hydroxy-3-methylbut-2-enyl-diphosphate synthase [EC:1.17.7.1 1.17.7.3] 1.17.7.1,1.17.7.3 ko00900; Metabolism; Metabolism of terpenoids and polyketides; Terpenoid backbone biosynthesis}	{NA}	{GO:0046429; 4-hydroxy-3-methylbut-2-en-1-yl diphosphate synthase activity; molecular_function GO:0016114; terpenoid biosynthetic process; biological_process GO:0055114; oxidation-reduction process; biological_process}	{XM_017380393.1; PREDICTED: Daucus carota subsp. sativus 4-hydroxy-3-methylbut-2-en-1-yl diphosphate synthase (ferredoxin), chloroplastic (LOC108209472), transcript variant X2, mRNA}	{PF04551:GcpE protein}
i1_LQ_SD_c5099/f1p12/1631	BfHDS23895	{XP_017235881.1; PREDICTED: 4-hydroxy-3-methylbut-2-en-1-yl diphosphate synthase (ferredoxin), chloroplastic [Daucus carota subsp. sativus]}	{sp|F4K0E8|ISPG_ARATH; 4-hydroxy-3-methylbut-2-en-1-yl diphosphate synthase (ferredoxin), chloroplastic OS=Arabidopsis thaliana OX=3702 GN=ISPG PE=1 SV=1}	{sot:102591285; K03526 gcpE, ispG (E)-4-hydroxy-3-methylbut-2-enyl-diphosphate synthase [EC:1.17.7.1 1.17.7.3] 1.17.7.1,1.17.7.3 ko00900; Metabolism; Metabolism of terpenoids and polyketides; Terpenoid backbone biosynthesis}	{NA}	{GO:0046429; 4-hydroxy-3-methylbut-2-en-1-yl diphosphate synthase activity; molecular_function GO:0016114; terpenoid biosynthetic process; biological_process GO:0055114; oxidation-reduction process; biological_process}	{XM_017380392.1; PREDICTED: Daucus carota subsp. sativus 4-hydroxy-3-methylbut-2-en-1-yl diphosphate synthase (ferredoxin), chloroplastic (LOC108209472), transcript variant X1, mRNA}	{PF04551:GcpE protein}
i2_HQ_SD_c110615/f2p4/2716	BfHDS30115	{XP_017235881.1; PREDICTED: 4-hydroxy-3-methylbut-2-en-1-yl diphosphate synthase (ferredoxin), chloroplastic [Daucus carota subsp. sativus]}	{sp|F4K0E8|ISPG_ARATH; 4-hydroxy-3-methylbut-2-en-1-yl diphosphate synthase (ferredoxin), chloroplastic OS=Arabidopsis thaliana OX=3702 GN=ISPG PE=1 SV=1}	{sot:102591285; K03526 gcpE, ispG (E)-4-hydroxy-3-methylbut-2-enyl-diphosphate synthase [EC:1.17.7.1 1.17.7.3] 1.17.7.1,1.17.7.3 ko00900; Metabolism; Metabolism of terpenoids and polyketides; Terpenoid backbone biosynthesis}	{NA}	{GO:0046429; 4-hydroxy-3-methylbut-2-en-1-yl diphosphate synthase activity; molecular_function GO:0016114; terpenoid biosynthetic process; biological_process GO:0055114; oxidation-reduction process; biological_process}	{XM_017380392.1; PREDICTED: Daucus carota subsp. sativus 4-hydroxy-3-methylbut-2-en-1-yl diphosphate synthase (ferredoxin), chloroplastic (LOC108209472), transcript variant X1, mRNA}	{PF04551:GcpE protein}
i2_HQ_SD_c119147/f4p1/2736	BfHDS30580	{XP_017235881.1; PREDICTED: 4-hydroxy-3-methylbut-2-en-1-yl diphosphate synthase (ferredoxin), chloroplastic [Daucus carota subsp. sativus]}	{sp|F4K0E8|ISPG_ARATH; 4-hydroxy-3-methylbut-2-en-1-yl diphosphate synthase (ferredoxin), chloroplastic OS=Arabidopsis thaliana OX=3702 GN=ISPG PE=1 SV=1}	{sot:102591285; K03526 gcpE, ispG (E)-4-hydroxy-3-methylbut-2-enyl-diphosphate synthase [EC:1.17.7.1 1.17.7.3] 1.17.7.1,1.17.7.3 ko00900; Metabolism; Metabolism of terpenoids and polyketides; Terpenoid backbone biosynthesis}	{NA}	{GO:0046429; 4-hydroxy-3-methylbut-2-en-1-yl diphosphate synthase activity; molecular_function GO:0016114; terpenoid biosynthetic process; biological_process GO:0055114; oxidation-reduction process; biological_process}	{XM_017380393.1; PREDICTED: Daucus carota subsp. sativus 4-hydroxy-3-methylbut-2-en-1-yl diphosphate synthase (ferredoxin), chloroplastic (LOC108209472), transcript variant X2, mRNA}	{PF04551:GcpE protein}
i2_HQ_SD_c13982/f2p5/2671	BfHDS31134	{XP_017235881.1; PREDICTED: 4-hydroxy-3-methylbut-2-en-1-yl diphosphate synthase (ferredoxin), chloroplastic [Daucus carota subsp. sativus]}	{sp|F4K0E8|ISPG_ARATH; 4-hydroxy-3-methylbut-2-en-1-yl diphosphate synthase (ferredoxin), chloroplastic OS=Arabidopsis thaliana OX=3702 GN=ISPG PE=1 SV=1}	{sot:102591285; K03526 gcpE, ispG (E)-4-hydroxy-3-methylbut-2-enyl-diphosphate synthase [EC:1.17.7.1 1.17.7.3] 1.17.7.1,1.17.7.3 ko00900; Metabolism; Metabolism of terpenoids and polyketides; Terpenoid backbone biosynthesis}	{NA}	{GO:0016114; terpenoid biosynthetic process; biological_process GO:0055114; oxidation-reduction process; biological_process GO:0046429; 4-hydroxy-3-methylbut-2-en-1-yl diphosphate synthase activity; molecular_function}	{XM_017380393.1; PREDICTED: Daucus carota subsp. sativus 4-hydroxy-3-methylbut-2-en-1-yl diphosphate synthase (ferredoxin), chloroplastic (LOC108209472), transcript variant X2, mRNA}	{PF04551:GcpE protein}
i2_HQ_SD_c1631/f6p1/2761	BfHDS31221	{XP_017235881.1; PREDICTED: 4-hydroxy-3-methylbut-2-en-1-yl diphosphate synthase (ferredoxin), chloroplastic [Daucus carota subsp. sativus]}	{sp|F4K0E8|ISPG_ARATH; 4-hydroxy-3-methylbut-2-en-1-yl diphosphate synthase (ferredoxin), chloroplastic OS=Arabidopsis thaliana OX=3702 GN=ISPG PE=1 SV=1}	{sot:102591285; K03526 gcpE, ispG (E)-4-hydroxy-3-methylbut-2-enyl-diphosphate synthase [EC:1.17.7.1 1.17.7.3] 1.17.7.1,1.17.7.3 ko00900; Metabolism; Metabolism of terpenoids and polyketides; Terpenoid backbone biosynthesis}	{NA}	{GO:0046429; 4-hydroxy-3-methylbut-2-en-1-yl diphosphate synthase activity; molecular_function GO:0055114; oxidation-reduction process; biological_process GO:0016114; terpenoid biosynthetic process; biological_process}	{XM_017380393.1; PREDICTED: Daucus carota subsp. sativus 4-hydroxy-3-methylbut-2-en-1-yl diphosphate synthase (ferredoxin), chloroplastic (LOC108209472), transcript variant X2, mRNA}	{PF04551:GcpE protein}
i2_HQ_SD_c1687/f5p3/2649	BfHDS31248	{XP_017235881.1; PREDICTED: 4-hydroxy-3-methylbut-2-en-1-yl diphosphate synthase (ferredoxin), chloroplastic [Daucus carota subsp. sativus]}	{sp|F4K0E8|ISPG_ARATH; 4-hydroxy-3-methylbut-2-en-1-yl diphosphate synthase (ferredoxin), chloroplastic OS=Arabidopsis thaliana OX=3702 GN=ISPG PE=1 SV=1}	{sot:102591285; K03526 gcpE, ispG (E)-4-hydroxy-3-methylbut-2-enyl-diphosphate synthase [EC:1.17.7.1 1.17.7.3] 1.17.7.1,1.17.7.3 ko00900; Metabolism; Metabolism of terpenoids and polyketides; Terpenoid backbone biosynthesis}	{NA}	{GO:0046429; 4-hydroxy-3-methylbut-2-en-1-yl diphosphate synthase activity; molecular_function GO:0055114; oxidation-reduction process; biological_process GO:0016114; terpenoid biosynthetic process; biological_process}	{XM_017380392.1; PREDICTED: Daucus carota subsp. sativus 4-hydroxy-3-methylbut-2-en-1-yl diphosphate synthase (ferredoxin), chloroplastic (LOC108209472), transcript variant X1, mRNA}	{PF04551:GcpE protein}
i2_HQ_SD_c24395/f3p1/2584	BfHDS32037	{APY22346.1; (E)-4-hydroxy-3-methylbut-2-enyl-diphosphate synthase, partial [Hedera helix]}	{sp|F4K0E8|ISPG_ARATH; 4-hydroxy-3-methylbut-2-en-1-yl diphosphate synthase (ferredoxin), chloroplastic OS=Arabidopsis thaliana OX=3702 GN=ISPG PE=1 SV=1}	{ini:109173191; K03526 gcpE, ispG (E)-4-hydroxy-3-methylbut-2-enyl-diphosphate synthase [EC:1.17.7.1 1.17.7.3] 1.17.7.1,1.17.7.3 ko00900; Metabolism; Metabolism of terpenoids and polyketides; Terpenoid backbone biosynthesis}	{NA}	{GO:0046429; 4-hydroxy-3-methylbut-2-en-1-yl diphosphate synthase activity; molecular_function GO:0055114; oxidation-reduction process; biological_process GO:0003855; 3-dehydroquinate dehydratase activity; molecular_function GO:0016114; terpenoid biosynthetic process; biological_process}	{XM_017392212.1; PREDICTED: Daucus carota subsp. sativus 4-hydroxy-3-methylbut-2-en-1-yl diphosphate synthase (ferredoxin), chloroplastic-like (LOC108218993), transcript variant X3, mRNA}	{PF01487:Type I 3-dehydroquinase PF04551:GcpE protein}
i2_HQ_SD_c50322/f2p1/2549	BfHDS33420	{APY22346.1; (E)-4-hydroxy-3-methylbut-2-enyl-diphosphate synthase, partial [Hedera helix]}	{sp|F4K0E8|ISPG_ARATH; 4-hydroxy-3-methylbut-2-en-1-yl diphosphate synthase (ferredoxin), chloroplastic OS=Arabidopsis thaliana OX=3702 GN=ISPG PE=1 SV=1}	{jcu:105628100; K03526 gcpE, ispG (E)-4-hydroxy-3-methylbut-2-enyl-diphosphate synthase [EC:1.17.7.1 1.17.7.3] 1.17.7.1,1.17.7.3 ko00900; Metabolism; Metabolism of terpenoids and polyketides; Terpenoid backbone biosynthesis}	{NA}	{GO:0046429; 4-hydroxy-3-methylbut-2-en-1-yl diphosphate synthase activity; molecular_function GO:0055114; oxidation-reduction process; biological_process GO:0016114; terpenoid biosynthetic process; biological_process}	{XM_017392212.1; PREDICTED: Daucus carota subsp. sativus 4-hydroxy-3-methylbut-2-en-1-yl diphosphate synthase (ferredoxin), chloroplastic-like (LOC108218993), transcript variant X3, mRNA}	{PF04551:GcpE protein}
i2_HQ_SD_c74879/f2p5/2961	BfHDS34402	{XP_017235881.1; PREDICTED: 4-hydroxy-3-methylbut-2-en-1-yl diphosphate synthase (ferredoxin), chloroplastic [Daucus carota subsp. sativus]}	{sp|F4K0E8|ISPG_ARATH; 4-hydroxy-3-methylbut-2-en-1-yl diphosphate synthase (ferredoxin), chloroplastic OS=Arabidopsis thaliana OX=3702 GN=ISPG PE=1 SV=1}	{sot:102591285; K03526 gcpE, ispG (E)-4-hydroxy-3-methylbut-2-enyl-diphosphate synthase [EC:1.17.7.1 1.17.7.3] 1.17.7.1,1.17.7.3 ko00900; Metabolism; Metabolism of terpenoids and polyketides; Terpenoid backbone biosynthesis}	{NA}	{GO:0046429; 4-hydroxy-3-methylbut-2-en-1-yl diphosphate synthase activity; molecular_function GO:0055114; oxidation-reduction process; biological_process GO:0016114; terpenoid biosynthetic process; biological_process}	{XM_017380393.1; PREDICTED: Daucus carota subsp. sativus 4-hydroxy-3-methylbut-2-en-1-yl diphosphate synthase (ferredoxin), chloroplastic (LOC108209472), transcript variant X2, mRNA}	{PF04551:GcpE protein}
i2_HQ_SD_c95233/f2p3/2732	BfHDS35106	{XP_017235881.1; PREDICTED: 4-hydroxy-3-methylbut-2-en-1-yl diphosphate synthase (ferredoxin), chloroplastic [Daucus carota subsp. sativus]}	{sp|F4K0E8|ISPG_ARATH; 4-hydroxy-3-methylbut-2-en-1-yl diphosphate synthase (ferredoxin), chloroplastic OS=Arabidopsis thaliana OX=3702 GN=ISPG PE=1 SV=1}	{sot:102591285; K03526 gcpE, ispG (E)-4-hydroxy-3-methylbut-2-enyl-diphosphate synthase [EC:1.17.7.1 1.17.7.3] 1.17.7.1,1.17.7.3 ko00900; Metabolism; Metabolism of terpenoids and polyketides; Terpenoid backbone biosynthesis}	{NA}	{GO:0046429; 4-hydroxy-3-methylbut-2-en-1-yl diphosphate synthase activity; molecular_function GO:0016114; terpenoid biosynthetic process; biological_process GO:0055114; oxidation-reduction process; biological_process}	{XM_017380393.1; PREDICTED: Daucus carota subsp. sativus 4-hydroxy-3-methylbut-2-en-1-yl diphosphate synthase (ferredoxin), chloroplastic (LOC108209472), transcript variant X2, mRNA}	{PF04551:GcpE protein}
i2_LQ_SD_c102697/f1p5/2794	BfHDS35706	{XP_017235881.1; PREDICTED: 4-hydroxy-3-methylbut-2-en-1-yl diphosphate synthase (ferredoxin), chloroplastic [Daucus carota subsp. sativus]}	{sp|F4K0E8|ISPG_ARATH; 4-hydroxy-3-methylbut-2-en-1-yl diphosphate synthase (ferredoxin), chloroplastic OS=Arabidopsis thaliana OX=3702 GN=ISPG PE=1 SV=1}	{sot:102591285; K03526 gcpE, ispG (E)-4-hydroxy-3-methylbut-2-enyl-diphosphate synthase [EC:1.17.7.1 1.17.7.3] 1.17.7.1,1.17.7.3 ko00900; Metabolism; Metabolism of terpenoids and polyketides; Terpenoid backbone biosynthesis}	{NA}	{GO:0016114; terpenoid biosynthetic process; biological_process GO:0055114; oxidation-reduction process; biological_process GO:0046429; 4-hydroxy-3-methylbut-2-en-1-yl diphosphate synthase activity; molecular_function}	{XM_017380393.1; PREDICTED: Daucus carota subsp. sativus 4-hydroxy-3-methylbut-2-en-1-yl diphosphate synthase (ferredoxin), chloroplastic (LOC108209472), transcript variant X2, mRNA}	{PF04551:GcpE protein}
i2_LQ_SD_c24053/f1p0/2553	BfHDS42888	{KZN05223.1; 4-hydroxy-3-methylbut-2-en-1-yl diphosphate synthase [Daucus carota subsp. sativus]}	{sp|F4K0E8|ISPG_ARATH; 4-hydroxy-3-methylbut-2-en-1-yl diphosphate synthase (ferredoxin), chloroplastic OS=Arabidopsis thaliana OX=3702 GN=ISPG PE=1 SV=1}	{pxb:103956778; K03526 gcpE, ispG (E)-4-hydroxy-3-methylbut-2-enyl-diphosphate synthase [EC:1.17.7.1 1.17.7.3] 1.17.7.1,1.17.7.3 ko00900; Metabolism; Metabolism of terpenoids and polyketides; Terpenoid backbone biosynthesis}	{NA}	{NA}	{XM_017380393.1; PREDICTED: Daucus carota subsp. sativus 4-hydroxy-3-methylbut-2-en-1-yl diphosphate synthase (ferredoxin), chloroplastic (LOC108209472), transcript variant X2, mRNA}	{NA}
i2_LQ_SD_c5151/f1p6/2485	BfHDS50743	{APY22346.1; (E)-4-hydroxy-3-methylbut-2-enyl-diphosphate synthase, partial [Hedera helix]}	{sp|F4K0E8|ISPG_ARATH; 4-hydroxy-3-methylbut-2-en-1-yl diphosphate synthase (ferredoxin), chloroplastic OS=Arabidopsis thaliana OX=3702 GN=ISPG PE=1 SV=1}	{ini:109173191; K03526 gcpE, ispG (E)-4-hydroxy-3-methylbut-2-enyl-diphosphate synthase [EC:1.17.7.1 1.17.7.3] 1.17.7.1,1.17.7.3 ko00900; Metabolism; Metabolism of terpenoids and polyketides; Terpenoid backbone biosynthesis}	{NA}	{GO:0016491; oxidoreductase activity; molecular_function GO:0055114; oxidation-reduction process; biological_process GO:0016114; terpenoid biosynthetic process; biological_process GO:0016209; NA GO:0046429; 4-hydroxy-3-methylbut-2-en-1-yl diphosphate synthase activity; molecular_function}	{XM_017392212.1; PREDICTED: Daucus carota subsp. sativus 4-hydroxy-3-methylbut-2-en-1-yl diphosphate synthase (ferredoxin), chloroplastic-like (LOC108218993), transcript variant X3, mRNA}	{PF04551:GcpE protein PF00578:AhpC/TSA family}
i2_LQ_SD_c76907/f1p3/2795	BfHDS58931	{KZN05223.1; 4-hydroxy-3-methylbut-2-en-1-yl diphosphate synthase [Daucus carota subsp. sativus]}	{sp|F4K0E8|ISPG_ARATH; 4-hydroxy-3-methylbut-2-en-1-yl diphosphate synthase (ferredoxin), chloroplastic OS=Arabidopsis thaliana OX=3702 GN=ISPG PE=1 SV=1}	{pxb:103956778; K03526 gcpE, ispG (E)-4-hydroxy-3-methylbut-2-enyl-diphosphate synthase [EC:1.17.7.1 1.17.7.3] 1.17.7.1,1.17.7.3 ko00900; Metabolism; Metabolism of terpenoids and polyketides; Terpenoid backbone biosynthesis}	{NA}	{GO:0055114; oxidation-reduction process; biological_process GO:0016114; terpenoid biosynthetic process; biological_process GO:0046429; 4-hydroxy-3-methylbut-2-en-1-yl diphosphate synthase activity; molecular_function}	{XM_017380392.1; PREDICTED: Daucus carota subsp. sativus 4-hydroxy-3-methylbut-2-en-1-yl diphosphate synthase (ferredoxin), chloroplastic (LOC108209472), transcript variant X1, mRNA}	{PF04551:GcpE protein}
i2_LQ_SD_c77443/f1p1/2620	BfHDS59171	{XP_017247699.1; PREDICTED: 4-hydroxy-3-methylbut-2-en-1-yl diphosphate synthase (ferredoxin), chloroplastic-like [Daucus carota subsp. sativus]}	{sp|F4K0E8|ISPG_ARATH; 4-hydroxy-3-methylbut-2-en-1-yl diphosphate synthase (ferredoxin), chloroplastic OS=Arabidopsis thaliana OX=3702 GN=ISPG PE=1 SV=1}	{ini:109173191; K03526 gcpE, ispG (E)-4-hydroxy-3-methylbut-2-enyl-diphosphate synthase [EC:1.17.7.1 1.17.7.3] 1.17.7.1,1.17.7.3 ko00900; Metabolism; Metabolism of terpenoids and polyketides; Terpenoid backbone biosynthesis}	{NA}	{GO:0050660; flavin adenine dinucleotide binding; molecular_function GO:0046429; 4-hydroxy-3-methylbut-2-en-1-yl diphosphate synthase activity; molecular_function GO:0050661; NADP binding; molecular_function GO:0004499; flavin-containing monooxygenase activity; molecular_function GO:0016114; terpenoid biosynthetic process; biological_process GO:0055114; oxidation-reduction process; biological_pro…	{KX056067.1; Hedera helix (E)-4-hydroxy-3-methylbut-2-enyl-diphosphate synthase (ispG) mRNA, partial cds}	{PF00743:Flavin-binding monooxygenase-like PF04551:GcpE protein}
i2_LQ_SD_c87847/f1p2/2226	BfHDS60484	{KZN05223.1; 4-hydroxy-3-methylbut-2-en-1-yl diphosphate synthase [Daucus carota subsp. sativus]}	{sp|F4K0E8|ISPG_ARATH; 4-hydroxy-3-methylbut-2-en-1-yl diphosphate synthase (ferredoxin), chloroplastic OS=Arabidopsis thaliana OX=3702 GN=ISPG PE=1 SV=1}	{sot:102591285; K03526 gcpE, ispG (E)-4-hydroxy-3-methylbut-2-enyl-diphosphate synthase [EC:1.17.7.1 1.17.7.3] 1.17.7.1,1.17.7.3 ko00900; Metabolism; Metabolism of terpenoids and polyketides; Terpenoid backbone biosynthesis}	{NA}	{GO:0046429; 4-hydroxy-3-methylbut-2-en-1-yl diphosphate synthase activity; molecular_function GO:0055114; oxidation-reduction process; biological_process GO:0016114; terpenoid biosynthetic process; biological_process}	{XM_017380392.1; PREDICTED: Daucus carota subsp. sativus 4-hydroxy-3-methylbut-2-en-1-yl diphosphate synthase (ferredoxin), chloroplastic (LOC108209472), transcript variant X1, mRNA}	{PF04551:GcpE protein}
i2_LQ_SD_c93499/f1p4/2525	BfHDS62887	{XP_017235881.1; PREDICTED: 4-hydroxy-3-methylbut-2-en-1-yl diphosphate synthase (ferredoxin), chloroplastic [Daucus carota subsp. sativus]}	{sp|F4K0E8|ISPG_ARATH; 4-hydroxy-3-methylbut-2-en-1-yl diphosphate synthase (ferredoxin), chloroplastic OS=Arabidopsis thaliana OX=3702 GN=ISPG PE=1 SV=1}	{pper:PRUPE_ppa002111mg; K03526 gcpE, ispG (E)-4-hydroxy-3-methylbut-2-enyl-diphosphate synthase [EC:1.17.7.1 1.17.7.3] 1.17.7.1,1.17.7.3 ko00900; Metabolism; Metabolism of terpenoids and polyketides; Terpenoid backbone biosynthesis}	{NA}	{GO:0055114; oxidation-reduction process; biological_process GO:0016114; terpenoid biosynthetic process; biological_process GO:0046429; 4-hydroxy-3-methylbut-2-en-1-yl diphosphate synthase activity; molecular_function}	{XM_017380392.1; PREDICTED: Daucus carota subsp. sativus 4-hydroxy-3-methylbut-2-en-1-yl diphosphate synthase (ferredoxin), chloroplastic (LOC108209472), transcript variant X1, mRNA}	{PF04551:GcpE protein}
i3_LQ_SD_c23522/f1p5/3157	BfHDS72033	{APY22346.1; (E)-4-hydroxy-3-methylbut-2-enyl-diphosphate synthase, partial [Hedera helix]}	{sp|F4K0E8|ISPG_ARATH; 4-hydroxy-3-methylbut-2-en-1-yl diphosphate synthase (ferredoxin), chloroplastic OS=Arabidopsis thaliana OX=3702 GN=ISPG PE=1 SV=1}	{cam:101515596; K03526 gcpE, ispG (E)-4-hydroxy-3-methylbut-2-enyl-diphosphate synthase [EC:1.17.7.1 1.17.7.3] 1.17.7.1,1.17.7.3 ko00900; Metabolism; Metabolism of terpenoids and polyketides; Terpenoid backbone biosynthesis}	{NA}	{GO:0046429; 4-hydroxy-3-methylbut-2-en-1-yl diphosphate synthase activity; molecular_function GO:0016114; terpenoid biosynthetic process; biological_process GO:0055114; oxidation-reduction process; biological_process}	{KX056067.1; Hedera helix (E)-4-hydroxy-3-methylbut-2-enyl-diphosphate synthase (ispG) mRNA, partial cds}	{PF04551:GcpE protein}
i3_LQ_SD_c27500/f1p3/3297	BfHDS74012	{XP_017247699.1; PREDICTED: 4-hydroxy-3-methylbut-2-en-1-yl diphosphate synthase (ferredoxin), chloroplastic-like [Daucus carota subsp. sativus]}	{sp|F4K0E8|ISPG_ARATH; 4-hydroxy-3-methylbut-2-en-1-yl diphosphate synthase (ferredoxin), chloroplastic OS=Arabidopsis thaliana OX=3702 GN=ISPG PE=1 SV=1}	{ini:109173191; K03526 gcpE, ispG (E)-4-hydroxy-3-methylbut-2-enyl-diphosphate synthase [EC:1.17.7.1 1.17.7.3] 1.17.7.1,1.17.7.3 ko00900; Metabolism; Metabolism of terpenoids and polyketides; Terpenoid backbone biosynthesis}	{NA}	{GO:0055114; oxidation-reduction process; biological_process GO:0016114; terpenoid biosynthetic process; biological_process GO:0046429; 4-hydroxy-3-methylbut-2-en-1-yl diphosphate synthase activity; molecular_function}	{XM_017392212.1; PREDICTED: Daucus carota subsp. sativus 4-hydroxy-3-methylbut-2-en-1-yl diphosphate synthase (ferredoxin), chloroplastic-like (LOC108218993), transcript variant X3, mRNA}	{PF04551:GcpE protein}
i4_LQ_SD_c13111/f1p8/4319	BfHDS87780	{XP_017247699.1; PREDICTED: 4-hydroxy-3-methylbut-2-en-1-yl diphosphate synthase (ferredoxin), chloroplastic-like [Daucus carota subsp. sativus]}	{sp|F4K0E8|ISPG_ARATH; 4-hydroxy-3-methylbut-2-en-1-yl diphosphate synthase (ferredoxin), chloroplastic OS=Arabidopsis thaliana OX=3702 GN=ISPG PE=1 SV=1}	{ini:109173191; K03526 gcpE, ispG (E)-4-hydroxy-3-methylbut-2-enyl-diphosphate synthase [EC:1.17.7.1 1.17.7.3] 1.17.7.1,1.17.7.3 ko00900; Metabolism; Metabolism of terpenoids and polyketides; Terpenoid backbone biosynthesis}	{NA}	{GO:0016114; terpenoid biosynthetic process; biological_process GO:0055114; oxidation-reduction process; biological_process GO:0046429; 4-hydroxy-3-methylbut-2-en-1-yl diphosphate synthase activity; molecular_function}	{KX056067.1; Hedera helix (E)-4-hydroxy-3-methylbut-2-enyl-diphosphate synthase (ispG) mRNA, partial cds}	{PF04551:GcpE protein}
i5_LQ_SD_c28705/f1p0/5730	BfHDS116210	{XP_017235881.1; PREDICTED: 4-hydroxy-3-methylbut-2-en-1-yl diphosphate synthase (ferredoxin), chloroplastic [Daucus carota subsp. sativus]}	{sp|F4K0E8|ISPG_ARATH; 4-hydroxy-3-methylbut-2-en-1-yl diphosphate synthase (ferredoxin), chloroplastic OS=Arabidopsis thaliana OX=3702 GN=ISPG PE=1 SV=1}	{pxb:103956778; K03526 gcpE, ispG (E)-4-hydroxy-3-methylbut-2-enyl-diphosphate synthase [EC:1.17.7.1 1.17.7.3] 1.17.7.1,1.17.7.3 ko00900; Metabolism; Metabolism of terpenoids and polyketides; Terpenoid backbone biosynthesis}	{NA}	{GO:0016114; terpenoid biosynthetic process; biological_process GO:0055114; oxidation-reduction process; biological_process GO:0046429; 4-hydroxy-3-methylbut-2-en-1-yl diphosphate synthase activity; molecular_function}	{XM_017380393.1; PREDICTED: Daucus carota subsp. sativus 4-hydroxy-3-methylbut-2-en-1-yl diphosphate synthase (ferredoxin), chloroplastic (LOC108209472), transcript variant X2, mRNA}	{PF04551:GcpE protein}
i1_HQ_SD_c69059/f10p1/1858	BfIDS10810	{XP_017258947.1; PREDICTED: 4-hydroxy-3-methylbut-2-enyl diphosphate reductase, chloroplastic-like [Daucus carota subsp. sativus]}	{sp|Q94B35|ISPH_ARATH; 4-hydroxy-3-methylbut-2-enyl diphosphate reductase, chloroplastic OS=Arabidopsis thaliana OX=3702 GN=ISPH PE=2 SV=1}	{spen:107002698; K03527 ispH, lytB 4-hydroxy-3-methylbut-2-en-1-yl diphosphate reductase 1.17.7.4 ko00900; Metabolism; Metabolism of terpenoids and polyketides; Terpenoid backbone biosynthesis}	{NA}	{GO:0050992; dimethylallyl diphosphate biosynthetic process; biological_process GO:0051745; 4-hydroxy-3-methylbut-2-en-1-yl diphosphate reductase activity; molecular_function GO:0019288; isopentenyl diphosphate biosynthetic process, mevalonate-independent pathway; biological_process GO:0046872; metal ion binding; molecular_function}	{XM_017403458.1; PREDICTED: Daucus carota subsp. sativus 4-hydroxy-3-methylbut-2-enyl diphosphate reductase, chloroplastic-like (LOC108228008), mRNA}	{PF02401:LytB protein}
i1_LQ_SD_c18121/f1p0/1473	BfIDS13508	{XP_017258947.1; PREDICTED: 4-hydroxy-3-methylbut-2-enyl diphosphate reductase, chloroplastic-like [Daucus carota subsp. sativus]}	{sp|Q94B35|ISPH_ARATH; 4-hydroxy-3-methylbut-2-enyl diphosphate reductase, chloroplastic OS=Arabidopsis thaliana OX=3702 GN=ISPH PE=2 SV=1}	{spen:107002698; K03527 ispH, lytB 4-hydroxy-3-methylbut-2-en-1-yl diphosphate reductase 1.17.7.4 ko00900; Metabolism; Metabolism of terpenoids and polyketides; Terpenoid backbone biosynthesis}	{NA}	{GO:0046872; metal ion binding; molecular_function GO:0051745; 4-hydroxy-3-methylbut-2-en-1-yl diphosphate reductase activity; molecular_function GO:0050992; dimethylallyl diphosphate biosynthetic process; biological_process GO:0019288; isopentenyl diphosphate biosynthetic process, mevalonate-independent pathway; biological_process}	{XM_017403458.1; PREDICTED: Daucus carota subsp. sativus 4-hydroxy-3-methylbut-2-enyl diphosphate reductase, chloroplastic-like (LOC108228008), mRNA}	{PF02401:LytB protein}
i1_LQ_SD_c35745/f1p0/1684	BfIDS19258	{XP_017259005.1; PREDICTED: 4-hydroxy-3-methylbut-2-enyl diphosphate reductase, chloroplastic-like [Daucus carota subsp. sativus]}	{sp|Q6AVG6|ISPH_ORYSJ; 4-hydroxy-3-methylbut-2-enyl diphosphate reductase, chloroplastic OS=Oryza sativa subsp. japonica OX=39947 GN=ISPH PE=2 SV=1}	{fve:101303948; K03527 ispH, lytB 4-hydroxy-3-methylbut-2-en-1-yl diphosphate reductase 1.17.7.4 ko00900; Metabolism; Metabolism of terpenoids and polyketides; Terpenoid backbone biosynthesis}	{NA}	{GO:0046872; metal ion binding; molecular_function GO:0051745; 4-hydroxy-3-methylbut-2-en-1-yl diphosphate reductase activity; molecular_function GO:0050992; dimethylallyl diphosphate biosynthetic process; biological_process GO:0019288; isopentenyl diphosphate biosynthetic process, mevalonate-independent pathway; biological_process}	{XM_017403516.1; PREDICTED: Daucus carota subsp. sativus 4-hydroxy-3-methylbut-2-enyl diphosphate reductase, chloroplastic-like (LOC108228046), mRNA}	{PF02401:LytB protein}
i1_LQ_SD_c35950/f1p6/1823	BfIDS19355	{XP_017259005.1; PREDICTED: 4-hydroxy-3-methylbut-2-enyl diphosphate reductase, chloroplastic-like [Daucus carota subsp. sativus]}	{sp|Q94B35|ISPH_ARATH; 4-hydroxy-3-methylbut-2-enyl diphosphate reductase, chloroplastic OS=Arabidopsis thaliana OX=3702 GN=ISPH PE=2 SV=1}	{spen:107002698; K03527 ispH, lytB 4-hydroxy-3-methylbut-2-en-1-yl diphosphate reductase 1.17.7.4 ko00900; Metabolism; Metabolism of terpenoids and polyketides; Terpenoid backbone biosynthesis}	{NA}	{GO:0046872; metal ion binding; molecular_function GO:0050992; dimethylallyl diphosphate biosynthetic process; biological_process GO:0051745; 4-hydroxy-3-methylbut-2-en-1-yl diphosphate reductase activity; molecular_function GO:0019288; isopentenyl diphosphate biosynthetic process, mevalonate-independent pathway; biological_process GO:0019288; isopentenyl diphosphate biosynthetic process, mevalon…	{XM_017403516.1; PREDICTED: Daucus carota subsp. sativus 4-hydroxy-3-methylbut-2-enyl diphosphate reductase, chloroplastic-like (LOC108228046), mRNA}	{PF02401:LytB protein PF02401:LytB protein}
i1_LQ_SD_c48995/f1p16/1790	BfIDS23037	{XP_017259005.1; PREDICTED: 4-hydroxy-3-methylbut-2-enyl diphosphate reductase, chloroplastic-like [Daucus carota subsp. sativus]}	{sp|Q94B35|ISPH_ARATH; 4-hydroxy-3-methylbut-2-enyl diphosphate reductase, chloroplastic OS=Arabidopsis thaliana OX=3702 GN=ISPH PE=2 SV=1}	{spen:107002698; K03527 ispH, lytB 4-hydroxy-3-methylbut-2-en-1-yl diphosphate reductase 1.17.7.4 ko00900; Metabolism; Metabolism of terpenoids and polyketides; Terpenoid backbone biosynthesis}	{NA}	{GO:0019288; isopentenyl diphosphate biosynthetic process, mevalonate-independent pathway; biological_process GO:0050992; dimethylallyl diphosphate biosynthetic process; biological_process GO:0051745; 4-hydroxy-3-methylbut-2-en-1-yl diphosphate reductase activity; molecular_function GO:0046872; metal ion binding; molecular_function}	{XM_017403516.1; PREDICTED: Daucus carota subsp. sativus 4-hydroxy-3-methylbut-2-enyl diphosphate reductase, chloroplastic-like (LOC108228046), mRNA}	{PF02401:LytB protein}
i1_LQ_SD_c49150/f1p0/1708	BfIDS23095	{AFQ98369.1; hydroxymethylbutenyl diphosphate reductase [Camellia sinensis]}	{sp|Q6AVG6|ISPH_ORYSJ; 4-hydroxy-3-methylbut-2-enyl diphosphate reductase, chloroplastic OS=Oryza sativa subsp. japonica OX=39947 GN=ISPH PE=2 SV=1}	{fve:101303948; K03527 ispH, lytB 4-hydroxy-3-methylbut-2-en-1-yl diphosphate reductase 1.17.7.4 ko00900; Metabolism; Metabolism of terpenoids and polyketides; Terpenoid backbone biosynthesis}	{NA}	{GO:0050992; dimethylallyl diphosphate biosynthetic process; biological_process GO:0051745; 4-hydroxy-3-methylbut-2-en-1-yl diphosphate reductase activity; molecular_function GO:0019288; isopentenyl diphosphate biosynthetic process, mevalonate-independent pathway; biological_process GO:0046872; metal ion binding; molecular_function}	{XM_017403516.1; PREDICTED: Daucus carota subsp. sativus 4-hydroxy-3-methylbut-2-enyl diphosphate reductase, chloroplastic-like (LOC108228046), mRNA}	{PF02401:LytB protein}
i1_LQ_SD_c51337/f1p1/1594	BfIDS24053	{XP_017258947.1; PREDICTED: 4-hydroxy-3-methylbut-2-enyl diphosphate reductase, chloroplastic-like [Daucus carota subsp. sativus]}	{sp|Q94B35|ISPH_ARATH; 4-hydroxy-3-methylbut-2-enyl diphosphate reductase, chloroplastic OS=Arabidopsis thaliana OX=3702 GN=ISPH PE=2 SV=1}	{spen:107002698; K03527 ispH, lytB 4-hydroxy-3-methylbut-2-en-1-yl diphosphate reductase 1.17.7.4 ko00900; Metabolism; Metabolism of terpenoids and polyketides; Terpenoid backbone biosynthesis}	{NA}	{GO:0046872; metal ion binding; molecular_function GO:0050992; dimethylallyl diphosphate biosynthetic process; biological_process GO:0051745; 4-hydroxy-3-methylbut-2-en-1-yl diphosphate reductase activity; molecular_function GO:0019288; isopentenyl diphosphate biosynthetic process, mevalonate-independent pathway; biological_process}	{XM_017403458.1; PREDICTED: Daucus carota subsp. sativus 4-hydroxy-3-methylbut-2-enyl diphosphate reductase, chloroplastic-like (LOC108228008), mRNA}	{PF02401:LytB protein}
i1_LQ_SD_c5787/f1p1/1976	BfIDS26957	{XP_017259005.1; PREDICTED: 4-hydroxy-3-methylbut-2-enyl diphosphate reductase, chloroplastic-like [Daucus carota subsp. sativus]}	{sp|Q94B35|ISPH_ARATH; 4-hydroxy-3-methylbut-2-enyl diphosphate reductase, chloroplastic OS=Arabidopsis thaliana OX=3702 GN=ISPH PE=2 SV=1}	{spen:107002698; K03527 ispH, lytB 4-hydroxy-3-methylbut-2-en-1-yl diphosphate reductase 1.17.7.4 ko00900; Metabolism; Metabolism of terpenoids and polyketides; Terpenoid backbone biosynthesis}	{NA}	{GO:0019288; isopentenyl diphosphate biosynthetic process, mevalonate-independent pathway; biological_process GO:0051745; 4-hydroxy-3-methylbut-2-en-1-yl diphosphate reductase activity; molecular_function GO:0050992; dimethylallyl diphosphate biosynthetic process; biological_process GO:0046872; metal ion binding; molecular_function}	{XM_017403516.1; PREDICTED: Daucus carota subsp. sativus 4-hydroxy-3-methylbut-2-enyl diphosphate reductase, chloroplastic-like (LOC108228046), mRNA}	{PF02401:LytB protein}
i1_LQ_SD_c9702/f1p16/1759	BfIDS29456	{XP_017258947.1; PREDICTED: 4-hydroxy-3-methylbut-2-enyl diphosphate reductase, chloroplastic-like [Daucus carota subsp. sativus]}	{sp|Q94B35|ISPH_ARATH; 4-hydroxy-3-methylbut-2-enyl diphosphate reductase, chloroplastic OS=Arabidopsis thaliana OX=3702 GN=ISPH PE=2 SV=1}	{spen:107002698; K03527 ispH, lytB 4-hydroxy-3-methylbut-2-en-1-yl diphosphate reductase 1.17.7.4 ko00900; Metabolism; Metabolism of terpenoids and polyketides; Terpenoid backbone biosynthesis}	{NA}	{GO:0046872; metal ion binding; molecular_function GO:0019288; isopentenyl diphosphate biosynthetic process, mevalonate-independent pathway; biological_process GO:0005975; carbohydrate metabolic process; biological_process GO:0003824; NA GO:0050992; dimethylallyl diphosphate biosynthetic process; biological_process GO:0051745; 4-hydroxy-3-methylbut-2-en-1-yl diphosphate reductase activity; molecu…	{XM_017403458.1; PREDICTED: Daucus carota subsp. sativus 4-hydroxy-3-methylbut-2-enyl diphosphate reductase, chloroplastic-like (LOC108228008), mRNA}	{PF03065:Glycosyl hydrolase family 57 PF02401:LytB protein}
i2_LQ_SD_c22891/f1p1/2413	BfIDS42469	{KZM90543.1; 4-Hydroxy-3-methylbut-2-enyl diphosphate reductase [Daucus carota subsp. sativus]}	{sp|Q94B35|ISPH_ARATH; 4-hydroxy-3-methylbut-2-enyl diphosphate reductase, chloroplastic OS=Arabidopsis thaliana OX=3702 GN=ISPH PE=2 SV=1}	{spen:107002698; K03527 ispH, lytB 4-hydroxy-3-methylbut-2-en-1-yl diphosphate reductase 1.17.7.4 ko00900; Metabolism; Metabolism of terpenoids and polyketides; Terpenoid backbone biosynthesis}	{NA}	{GO:0019288; isopentenyl diphosphate biosynthetic process, mevalonate-independent pathway; biological_process GO:0050992; dimethylallyl diphosphate biosynthetic process; biological_process GO:0051745; 4-hydroxy-3-methylbut-2-en-1-yl diphosphate reductase activity; molecular_function GO:0046872; metal ion binding; molecular_function}	{XM_017403516.1; PREDICTED: Daucus carota subsp. sativus 4-hydroxy-3-methylbut-2-enyl diphosphate reductase, chloroplastic-like (LOC108228046), mRNA}	{PF02401:LytB protein}
i2_LQ_SD_c23119/f1p1/2499	BfIDS42555	{XP_017259005.1; PREDICTED: 4-hydroxy-3-methylbut-2-enyl diphosphate reductase, chloroplastic-like [Daucus carota subsp. sativus]}	{sp|Q94B35|ISPH_ARATH; 4-hydroxy-3-methylbut-2-enyl diphosphate reductase, chloroplastic OS=Arabidopsis thaliana OX=3702 GN=ISPH PE=2 SV=1}	{spen:107002698; K03527 ispH, lytB 4-hydroxy-3-methylbut-2-en-1-yl diphosphate reductase 1.17.7.4 ko00900; Metabolism; Metabolism of terpenoids and polyketides; Terpenoid backbone biosynthesis}	{NA}	{GO:0046872; metal ion binding; molecular_function GO:0050992; dimethylallyl diphosphate biosynthetic process; biological_process GO:0051745; 4-hydroxy-3-methylbut-2-en-1-yl diphosphate reductase activity; molecular_function GO:0019288; isopentenyl diphosphate biosynthetic process, mevalonate-independent pathway; biological_process}	{XM_017403516.1; PREDICTED: Daucus carota subsp. sativus 4-hydroxy-3-methylbut-2-enyl diphosphate reductase, chloroplastic-like (LOC108228046), mRNA}	{PF02401:LytB protein}
i2_LQ_SD_c72759/f1p2/2748	BfIDS57169	{KZM90543.1; 4-Hydroxy-3-methylbut-2-enyl diphosphate reductase [Daucus carota subsp. sativus]}	{sp|Q94B35|ISPH_ARATH; 4-hydroxy-3-methylbut-2-enyl diphosphate reductase, chloroplastic OS=Arabidopsis thaliana OX=3702 GN=ISPH PE=2 SV=1}	{spen:107002698; K03527 ispH, lytB 4-hydroxy-3-methylbut-2-en-1-yl diphosphate reductase 1.17.7.4 ko00900; Metabolism; Metabolism of terpenoids and polyketides; Terpenoid backbone biosynthesis}	{NA}	{NA}	{NA}	{NA}
i2_LQ_SD_c73961/f1p1/2291	BfIDS57694	{XP_017259005.1; PREDICTED: 4-hydroxy-3-methylbut-2-enyl diphosphate reductase, chloroplastic-like [Daucus carota subsp. sativus]}	{sp|Q94B35|ISPH_ARATH; 4-hydroxy-3-methylbut-2-enyl diphosphate reductase, chloroplastic OS=Arabidopsis thaliana OX=3702 GN=ISPH PE=2 SV=1}	{spen:107002698; K03527 ispH, lytB 4-hydroxy-3-methylbut-2-en-1-yl diphosphate reductase 1.17.7.4 ko00900; Metabolism; Metabolism of terpenoids and polyketides; Terpenoid backbone biosynthesis}	{NA}	{GO:0019288; isopentenyl diphosphate biosynthetic process, mevalonate-independent pathway; biological_process GO:0050992; dimethylallyl diphosphate biosynthetic process; biological_process GO:0051745; 4-hydroxy-3-methylbut-2-en-1-yl diphosphate reductase activity; molecular_function GO:0046872; metal ion binding; molecular_function}	{XM_017403516.1; PREDICTED: Daucus carota subsp. sativus 4-hydroxy-3-methylbut-2-enyl diphosphate reductase, chloroplastic-like (LOC108228046), mRNA}	{PF02401:LytB protein}
i3_LQ_SD_c24682/f1p4/3557	BfIDS72587	{XP_017258947.1; PREDICTED: 4-hydroxy-3-methylbut-2-enyl diphosphate reductase, chloroplastic-like [Daucus carota subsp. sativus]}	{sp|Q6AVG6|ISPH_ORYSJ; 4-hydroxy-3-methylbut-2-enyl diphosphate reductase, chloroplastic OS=Oryza sativa subsp. japonica OX=39947 GN=ISPH PE=2 SV=1}	{cic:CICLE_v10028384mg; K03527 ispH, lytB 4-hydroxy-3-methylbut-2-en-1-yl diphosphate reductase 1.17.7.4 ko00900; Metabolism; Metabolism of terpenoids and polyketides; Terpenoid backbone biosynthesis}	{NA}	{NA}	{XM_017403458.1; PREDICTED: Daucus carota subsp. sativus 4-hydroxy-3-methylbut-2-enyl diphosphate reductase, chloroplastic-like (LOC108228008), mRNA}	{NA}
i4_LQ_SD_c67963/f1p0/4838	BfIDS102770	{XP_017258947.1; PREDICTED: 4-hydroxy-3-methylbut-2-enyl diphosphate reductase, chloroplastic-like [Daucus carota subsp. sativus]}	{sp|Q94B35|ISPH_ARATH; 4-hydroxy-3-methylbut-2-enyl diphosphate reductase, chloroplastic OS=Arabidopsis thaliana OX=3702 GN=ISPH PE=2 SV=1}	{spen:107002698; K03527 ispH, lytB 4-hydroxy-3-methylbut-2-en-1-yl diphosphate reductase 1.17.7.4 ko00900; Metabolism; Metabolism of terpenoids and polyketides; Terpenoid backbone biosynthesis}	{NA}	{GO:0050992; dimethylallyl diphosphate biosynthetic process; biological_process GO:0051745; 4-hydroxy-3-methylbut-2-en-1-yl diphosphate reductase activity; molecular_function GO:0019288; isopentenyl diphosphate biosynthetic process, mevalonate-independent pathway; biological_process GO:0046872; metal ion binding; molecular_function GO:0006353; transcription termination, DNA-dependent; biological_…	{XM_017403458.1; PREDICTED: Daucus carota subsp. sativus 4-hydroxy-3-methylbut-2-enyl diphosphate reductase, chloroplastic-like (LOC108228008), mRNA}	{PF07498:Rho termination factor, N-terminal domain PF02401:LytB protein}
i1_HQ_SD_c46638/f7p1/1127	BfIDI9893	{ACV74320.1; isopentenyl diphosphate isomerase [Bupleurum chinense]}	{sp|O48965|IDI2_CAMAC; Isopentenyl-diphosphate Delta-isomerase II OS=Camptotheca acuminata OX=16922 GN=IPI2 PE=2 SV=1}	{egr:104440342; K01823 idi, IDI isopentenyl-diphosphate Delta-isomerase 5.3.3.2 ko00900; Metabolism; Metabolism of terpenoids and polyketides; Terpenoid backbone biosynthesis}	{At3g02780; KOG0142 Isopentenyl pyrophosphate:dimethylallyl pyrophosphate isomerase Q Secondary metabolites biosynthesis, transport and catabolism ;}	{GO:0016787; hydrolase activity; molecular_function}	{GQ433719.1; Bupleurum chinense clone Bc_IPPI 2 isopentenyl diphosphate isomerase (IPPI) mRNA, complete cds}	{PF00293:NUDIX domain}
i2_LQ_SD_c93905/f1p1/2516	BfIDI63066	{ACV74320.1; isopentenyl diphosphate isomerase [Bupleurum chinense]}	{sp|O48964|IDI1_CAMAC; Isopentenyl-diphosphate Delta-isomerase I OS=Camptotheca acuminata OX=16922 GN=IPI1 PE=2 SV=1}	{csv:101209923; K01823 idi, IDI isopentenyl-diphosphate Delta-isomerase 5.3.3.2 ko00900; Metabolism; Metabolism of terpenoids and polyketides; Terpenoid backbone biosynthesis}	{At3g02780; KOG0142 Isopentenyl pyrophosphate:dimethylallyl pyrophosphate isomerase Q Secondary metabolites biosynthesis, transport and catabolism ;}	{GO:0016787; hydrolase activity; molecular_function}	{GQ433719.1; Bupleurum chinense clone Bc_IPPI 2 isopentenyl diphosphate isomerase (IPPI) mRNA, complete cds}	{PF00293:NUDIX domain}
i1_LQ_SD_c12011/f1p4/1989	BfGPS12149	{AIK21792.1; geranylgeranyl diphosphate synthase [Panax notoginseng]}	{sp|Q42698|GGPPS_CATRO; Geranylgeranyl pyrophosphate synthase, chloroplastic OS=Catharanthus roseus OX=4058 GN=GGPS1 PE=3 SV=1}	{rcu:8264179; K13789 GGPS geranylgeranyl diphosphate synthase, type II [EC:2.5.1.1 2.5.1.10 2.5.1.29] 2.5.1.1,2.5.1.10,2.5.1.29 ko00900; Metabolism; Metabolism of terpenoids and polyketides; Terpenoid backbone biosynthesis}	{At4g36810; KOG0776 Geranylgeranyl pyrophosphate synthase/Polyprenyl synthetase H Coenzyme transport and metabolism ;}	{GO:0016021; integral to membrane; cellular_component GO:0016765; transferase activity, transferring alkyl or aryl (other than methyl) groups; molecular_function GO:0008299; isoprenoid biosynthetic process; biological_process}	{KJ804178.1; Panax notoginseng isolate CL278Contig6_GGR_reverse geranylgeranyl diphosphate synthase mRNA, complete cds}	{PF00348:Polyprenyl synthetase PF01040:UbiA prenyltransferase family}
i1_LQ_SD_c17643/f2p0/1342	BfGPS13408	{ABB52065.1; putative geranylgeranyl pyrophosphate synthase [Daucus carota subsp. sativus]}	{sp|Q42698|GGPPS_CATRO; Geranylgeranyl pyrophosphate synthase, chloroplastic OS=Catharanthus roseus OX=4058 GN=GGPS1 PE=3 SV=1}	{rcu:8264179; K13789 GGPS geranylgeranyl diphosphate synthase, type II [EC:2.5.1.1 2.5.1.10 2.5.1.29] 2.5.1.1,2.5.1.10,2.5.1.29 ko00900; Metabolism; Metabolism of terpenoids and polyketides; Terpenoid backbone biosynthesis}	{At4g36810; KOG0776 Geranylgeranyl pyrophosphate synthase/Polyprenyl synthetase H Coenzyme transport and metabolism ;}	{GO:0008299; isoprenoid biosynthetic process; biological_process}	{XM_017381454.1; PREDICTED: Daucus carota subsp. sativus geranylgeranyl pyrophosphate synthase, chloroplastic-like (LOC108210173), mRNA}	{PF00348:Polyprenyl synthetase}
i1_LQ_SD_c19959/f1p2/1988	BfGPS14239	{XP_017249855.1; PREDICTED: heterodimeric geranylgeranyl pyrophosphate synthase small subunit, chloroplastic-like [Daucus carota subsp. sativus]}	{sp|Q39108|GGR_ARATH; Heterodimeric geranylgeranyl pyrophosphate synthase small subunit, chloroplastic OS=Arabidopsis thaliana OX=3702 GN=GGR PE=1 SV=2}	{jcu:105632969; K13789 GGPS geranylgeranyl diphosphate synthase, type II [EC:2.5.1.1 2.5.1.10 2.5.1.29] 2.5.1.1,2.5.1.10,2.5.1.29 ko00900; Metabolism; Metabolism of terpenoids and polyketides; Terpenoid backbone biosynthesis}	{At4g38460; KOG0776 Geranylgeranyl pyrophosphate synthase/Polyprenyl synthetase H Coenzyme transport and metabolism ;}	{GO:0008299; isoprenoid biosynthetic process; biological_process}	{XM_017394366.1; PREDICTED: Daucus carota subsp. sativus heterodimeric geranylgeranyl pyrophosphate synthase small subunit, chloroplastic-like (LOC108220564), mRNA}	{PF00348:Polyprenyl synthetase}
i1_LQ_SD_c21851/f1p1/1426	BfGPS14970	{XP_017246904.1; PREDICTED: geranylgeranyl pyrophosphate synthase, chloroplastic-like [Daucus carota subsp. sativus]}	{sp|P80042|GGPPS_CAPAN; Geranylgeranyl pyrophosphate synthase, chloroplastic OS=Capsicum annuum OX=4072 GN=GGPS1 PE=3 SV=1}	{mtr:MTR_8g078070; K13789 GGPS geranylgeranyl diphosphate synthase, type II [EC:2.5.1.1 2.5.1.10 2.5.1.29] 2.5.1.1,2.5.1.10,2.5.1.29 ko00900; Metabolism; Metabolism of terpenoids and polyketides; Terpenoid backbone biosynthesis}	{At4g36810; KOG0776 Geranylgeranyl pyrophosphate synthase/Polyprenyl synthetase H Coenzyme transport and metabolism ;}	{GO:0016765; transferase activity, transferring alkyl or aryl (other than methyl) groups; molecular_function GO:0008299; isoprenoid biosynthetic process; biological_process GO:0016021; integral to membrane; cellular_component}	{KJ804179.1; Panax notoginseng isolate CL278Contig4_GGPS geranylgeranyl pyrophosphate synthase mRNA, partial cds}	{PF00348:Polyprenyl synthetase PF01040:UbiA prenyltransferase family}
i1_LQ_SD_c22063/f1p1/1284	BfGPS15048	{XP_017249855.1; PREDICTED: heterodimeric geranylgeranyl pyrophosphate synthase small subunit, chloroplastic-like [Daucus carota subsp. sativus]}	{sp|Q39108|GGR_ARATH; Heterodimeric geranylgeranyl pyrophosphate synthase small subunit, chloroplastic OS=Arabidopsis thaliana OX=3702 GN=GGR PE=1 SV=2}	{jcu:105632969; K13789 GGPS geranylgeranyl diphosphate synthase, type II [EC:2.5.1.1 2.5.1.10 2.5.1.29] 2.5.1.1,2.5.1.10,2.5.1.29 ko00900; Metabolism; Metabolism of terpenoids and polyketides; Terpenoid backbone biosynthesis}	{At4g38460; KOG0776 Geranylgeranyl pyrophosphate synthase/Polyprenyl synthetase H Coenzyme transport and metabolism ;}	{GO:0008299; isoprenoid biosynthetic process; biological_process}	{XM_017394366.1; PREDICTED: Daucus carota subsp. sativus heterodimeric geranylgeranyl pyrophosphate synthase small subunit, chloroplastic-like (LOC108220564), mRNA}	{PF00348:Polyprenyl synthetase}
i1_LQ_SD_c23742/f1p1/1376	BfGPS15674	{XP_017257890.1; PREDICTED: heterodimeric geranylgeranyl pyrophosphate synthase small subunit, chloroplastic-like [Daucus carota subsp. sativus]}	{sp|Q39108|GGR_ARATH; Heterodimeric geranylgeranyl pyrophosphate synthase small subunit, chloroplastic OS=Arabidopsis thaliana OX=3702 GN=GGR PE=1 SV=2}	{pop:POPTR_0004s18610g; K13789 GGPS geranylgeranyl diphosphate synthase, type II [EC:2.5.1.1 2.5.1.10 2.5.1.29] 2.5.1.1,2.5.1.10,2.5.1.29 ko00900; Metabolism; Metabolism of terpenoids and polyketides; Terpenoid backbone biosynthesis}	{At4g38460; KOG0776 Geranylgeranyl pyrophosphate synthase/Polyprenyl synthetase H Coenzyme transport and metabolism ;}	{GO:0008299; isoprenoid biosynthetic process; biological_process}	{XM_017402401.1; PREDICTED: Daucus carota subsp. sativus heterodimeric geranylgeranyl pyrophosphate synthase small subunit, chloroplastic-like (LOC108227321), mRNA}	{PF00348:Polyprenyl synthetase}
i1_LQ_SD_c26922/f1p0/1567	BfGPS16891	{ABB52065.1; putative geranylgeranyl pyrophosphate synthase [Daucus carota subsp. sativus]}	{sp|Q42698|GGPPS_CATRO; Geranylgeranyl pyrophosphate synthase, chloroplastic OS=Catharanthus roseus OX=4058 GN=GGPS1 PE=3 SV=1}	{rcu:8264179; K13789 GGPS geranylgeranyl diphosphate synthase, type II [EC:2.5.1.1 2.5.1.10 2.5.1.29] 2.5.1.1,2.5.1.10,2.5.1.29 ko00900; Metabolism; Metabolism of terpenoids and polyketides; Terpenoid backbone biosynthesis}	{At4g36810; KOG0776 Geranylgeranyl pyrophosphate synthase/Polyprenyl synthetase H Coenzyme transport and metabolism ;}	{GO:0008299; isoprenoid biosynthetic process; biological_process}	{XM_017381454.1; PREDICTED: Daucus carota subsp. sativus geranylgeranyl pyrophosphate synthase, chloroplastic-like (LOC108210173), mRNA}	{PF00348:Polyprenyl synthetase}
i1_LQ_SD_c35113/f1p0/1492	BfGPS18976	{XP_017246904.1; PREDICTED: geranylgeranyl pyrophosphate synthase, chloroplastic-like [Daucus carota subsp. sativus]}	{sp|P80042|GGPPS_CAPAN; Geranylgeranyl pyrophosphate synthase, chloroplastic OS=Capsicum annuum OX=4072 GN=GGPS1 PE=3 SV=1}	{sly:778360; K13789 GGPS geranylgeranyl diphosphate synthase, type II [EC:2.5.1.1 2.5.1.10 2.5.1.29] 2.5.1.1,2.5.1.10,2.5.1.29 ko00900; Metabolism; Metabolism of terpenoids and polyketides; Terpenoid backbone biosynthesis}	{At4g36810; KOG0776 Geranylgeranyl pyrophosphate synthase/Polyprenyl synthetase H Coenzyme transport and metabolism ;}	{GO:0016765; transferase activity, transferring alkyl or aryl (other than methyl) groups; molecular_function GO:0008299; isoprenoid biosynthetic process; biological_process GO:0016021; integral to membrane; cellular_component}	{KJ804179.1; Panax notoginseng isolate CL278Contig4_GGPS geranylgeranyl pyrophosphate synthase mRNA, partial cds}	{PF00348:Polyprenyl synthetase PF01040:UbiA prenyltransferase family}
i1_LQ_SD_c45517/f1p0/1153	BfGPS22652	{XP_017249855.1; PREDICTED: heterodimeric geranylgeranyl pyrophosphate synthase small subunit, chloroplastic-like [Daucus carota subsp. sativus]}	{sp|Q39108|GGR_ARATH; Heterodimeric geranylgeranyl pyrophosphate synthase small subunit, chloroplastic OS=Arabidopsis thaliana OX=3702 GN=GGR PE=1 SV=2}	{jcu:105632969; K13789 GGPS geranylgeranyl diphosphate synthase, type II [EC:2.5.1.1 2.5.1.10 2.5.1.29] 2.5.1.1,2.5.1.10,2.5.1.29 ko00900; Metabolism; Metabolism of terpenoids and polyketides; Terpenoid backbone biosynthesis}	{At4g38460; KOG0776 Geranylgeranyl pyrophosphate synthase/Polyprenyl synthetase H Coenzyme transport and metabolism ;}	{GO:0008299; isoprenoid biosynthetic process; biological_process}	{XM_017394366.1; PREDICTED: Daucus carota subsp. sativus heterodimeric geranylgeranyl pyrophosphate synthase small subunit, chloroplastic-like (LOC108220564), mRNA}	{PF00348:Polyprenyl synthetase}
i1_LQ_SD_c57938/f1p1/1175	BfGPS26989	{XP_017249855.1; PREDICTED: heterodimeric geranylgeranyl pyrophosphate synthase small subunit, chloroplastic-like [Daucus carota subsp. sativus]}	{NA}	{cam:101506261; K13789 GGPS geranylgeranyl diphosphate synthase, type II [EC:2.5.1.1 2.5.1.10 2.5.1.29] 2.5.1.1,2.5.1.10,2.5.1.29 ko00900; Metabolism; Metabolism of terpenoids and polyketides; Terpenoid backbone biosynthesis}	{NA}	{NA}	{XM_017394366.1; PREDICTED: Daucus carota subsp. sativus heterodimeric geranylgeranyl pyrophosphate synthase small subunit, chloroplastic-like (LOC108220564), mRNA}	{NA}
i1_LQ_SD_c61765/f1p5/1112	BfGPS27614	{XP_017249855.1; PREDICTED: heterodimeric geranylgeranyl pyrophosphate synthase small subunit, chloroplastic-like [Daucus carota subsp. sativus]}	{NA}	{cam:101506261; K13789 GGPS geranylgeranyl diphosphate synthase, type II [EC:2.5.1.1 2.5.1.10 2.5.1.29] 2.5.1.1,2.5.1.10,2.5.1.29 ko00900; Metabolism; Metabolism of terpenoids and polyketides; Terpenoid backbone biosynthesis}	{NA}	{GO:0008299; isoprenoid biosynthetic process; biological_process}	{XM_017394366.1; PREDICTED: Daucus carota subsp. sativus heterodimeric geranylgeranyl pyrophosphate synthase small subunit, chloroplastic-like (LOC108220564), mRNA}	{PF00348:Polyprenyl synthetase}
i2_LQ_SD_c22335/f1p7/2266	BfGPS42266	{AIK21792.1; geranylgeranyl diphosphate synthase [Panax notoginseng]}	{sp|Q42698|GGPPS_CATRO; Geranylgeranyl pyrophosphate synthase, chloroplastic OS=Catharanthus roseus OX=4058 GN=GGPS1 PE=3 SV=1}	{rcu:8264179; K13789 GGPS geranylgeranyl diphosphate synthase, type II [EC:2.5.1.1 2.5.1.10 2.5.1.29] 2.5.1.1,2.5.1.10,2.5.1.29 ko00900; Metabolism; Metabolism of terpenoids and polyketides; Terpenoid backbone biosynthesis}	{At4g36810; KOG0776 Geranylgeranyl pyrophosphate synthase/Polyprenyl synthetase H Coenzyme transport and metabolism ;}	{GO:0008299; isoprenoid biosynthetic process; biological_process GO:0016765; transferase activity, transferring alkyl or aryl (other than methyl) groups; molecular_function GO:0016021; integral to membrane; cellular_component}	{KJ804178.1; Panax notoginseng isolate CL278Contig6_GGR_reverse geranylgeranyl diphosphate synthase mRNA, complete cds}	{PF01040:UbiA prenyltransferase family PF00348:Polyprenyl synthetase}
i3_LQ_SD_c25356/f1p0/3540	BfGPS72914	{AIK21792.1; geranylgeranyl diphosphate synthase [Panax notoginseng]}	{sp|Q42698|GGPPS_CATRO; Geranylgeranyl pyrophosphate synthase, chloroplastic OS=Catharanthus roseus OX=4058 GN=GGPS1 PE=3 SV=1}	{rcu:8264179; K13789 GGPS geranylgeranyl diphosphate synthase, type II [EC:2.5.1.1 2.5.1.10 2.5.1.29] 2.5.1.1,2.5.1.10,2.5.1.29 ko00900; Metabolism; Metabolism of terpenoids and polyketides; Terpenoid backbone biosynthesis}	{At4g36810; KOG0776 Geranylgeranyl pyrophosphate synthase/Polyprenyl synthetase H Coenzyme transport and metabolism ;}	{GO:0016021; integral to membrane; cellular_component GO:0008299; isoprenoid biosynthetic process; biological_process GO:0016765; transferase activity, transferring alkyl or aryl (other than methyl) groups; molecular_function}	{KJ804178.1; Panax notoginseng isolate CL278Contig6_GGR_reverse geranylgeranyl diphosphate synthase mRNA, complete cds}	{PF01040:UbiA prenyltransferase family PF00348:Polyprenyl synthetase}
i1_HQ_SD_c17856/f3p0/1481	BfFPS7968	{ADL74465.1; farnesyl diphosphate synthase [Bupleurum chinense]}	{sp|O24241|FPPS1_PARAR; Farnesyl pyrophosphate synthase 1 OS=Parthenium argentatum OX=35935 GN=FPS1 PE=2 SV=1}	{cit:102615408; K00787 FDPS farnesyl diphosphate synthase [EC:2.5.1.1 2.5.1.10] 2.5.1.1,2.5.1.10 ko00900; Metabolism; Metabolism of terpenoids and polyketides; Terpenoid backbone biosynthesis | ko05166; Human Diseases; Infectious diseases: Viral; HTLV-I infection | ko05164; Human Diseases; Infectious diseases: Viral; Influenza A}	{At5g47770; KOG0711 Polyprenyl synthetase H Coenzyme transport and metabolism ;}	{GO:0055114; oxidation-reduction process; biological_process GO:0016616; oxidoreductase activity, acting on the CH-OH group of donors, NAD or NADP as acceptor; molecular_function GO:0008299; isoprenoid biosynthetic process; biological_process GO:0006508; proteolysis; biological_process}	{HQ123429.1; Bupleurum chinense farnesyl diphosphate synthase (FPS) mRNA, complete cds}	{PF00348:Polyprenyl synthetase PF05649:Peptidase family M13 PF02866:lactate/malate dehydrogenase, alpha/beta C-terminal domain}
i1_HQ_SD_c59262/f3p131/1282	BfFPS10325	{ADL74465.1; farnesyl diphosphate synthase [Bupleurum chinense]}	{sp|O24241|FPPS1_PARAR; Farnesyl pyrophosphate synthase 1 OS=Parthenium argentatum OX=35935 GN=FPS1 PE=2 SV=1}	{cit:102615408; K00787 FDPS farnesyl diphosphate synthase [EC:2.5.1.1 2.5.1.10] 2.5.1.1,2.5.1.10 ko00900; Metabolism; Metabolism of terpenoids and polyketides; Terpenoid backbone biosynthesis | ko05166; Human Diseases; Infectious diseases: Viral; HTLV-I infection | ko05164; Human Diseases; Infectious diseases: Viral; Influenza A}	{At4g17190; KOG0711 Polyprenyl synthetase H Coenzyme transport and metabolism ;}	{GO:0016616; oxidoreductase activity, acting on the CH-OH group of donors, NAD or NADP as acceptor; molecular_function GO:0008299; isoprenoid biosynthetic process; biological_process GO:0055114; oxidation-reduction process; biological_process}	{HQ123429.1; Bupleurum chinense farnesyl diphosphate synthase (FPS) mRNA, complete cds}	{PF00348:Polyprenyl synthetase PF02866:lactate/malate dehydrogenase, alpha/beta C-terminal domain}
i2_LQ_SD_c24573/f1p0/2880	BfFPS43085	{ADL74465.1; farnesyl diphosphate synthase [Bupleurum chinense]}	{sp|P49350|FPPS_ARTAN; Farnesyl pyrophosphate synthase OS=Artemisia annua OX=35608 GN=FPS1 PE=2 SV=1}	{cit:102615408; K00787 FDPS farnesyl diphosphate synthase [EC:2.5.1.1 2.5.1.10] 2.5.1.1,2.5.1.10 ko00900; Metabolism; Metabolism of terpenoids and polyketides; Terpenoid backbone biosynthesis | ko05166; Human Diseases; Infectious diseases: Viral; HTLV-I infection | ko05164; Human Diseases; Infectious diseases: Viral; Influenza A}	{At5g47770; KOG0711 Polyprenyl synthetase H Coenzyme transport and metabolism ;}	{GO:0008299; isoprenoid biosynthetic process; biological_process GO:0016616; oxidoreductase activity, acting on the CH-OH group of donors, NAD or NADP as acceptor; molecular_function GO:0055114; oxidation-reduction process; biological_process GO:0006508; proteolysis; biological_process}	{HQ123429.1; Bupleurum chinense farnesyl diphosphate synthase (FPS) mRNA, complete cds}	{PF05649:Peptidase family M13 PF02866:lactate/malate dehydrogenase, alpha/beta C-terminal domain PF00348:Polyprenyl synthetase}
i2_LQ_SD_c75633/f1p0/2786	BfFPS58392	{ADL74465.1; farnesyl diphosphate synthase [Bupleurum chinense]}	{sp|Q7XYS9|FPPS1_ARTSI; Farnesyl diphosphate synthase 1 OS=Artemisia spiciformis OX=235357 GN=FDS-1 PE=1 SV=1}	{cit:102615408; K00787 FDPS farnesyl diphosphate synthase [EC:2.5.1.1 2.5.1.10] 2.5.1.1,2.5.1.10 ko00900; Metabolism; Metabolism of terpenoids and polyketides; Terpenoid backbone biosynthesis | ko05166; Human Diseases; Infectious diseases: Viral; HTLV-I infection | ko05164; Human Diseases; Infectious diseases: Viral; Influenza A}	{At5g47770; KOG0711 Polyprenyl synthetase H Coenzyme transport and metabolism ;}	{GO:0006508; proteolysis; biological_process GO:0008299; isoprenoid biosynthetic process; biological_process GO:0016616; oxidoreductase activity, acting on the CH-OH group of donors, NAD or NADP as acceptor; molecular_function GO:0055114; oxidation-reduction process; biological_process}	{HQ123429.1; Bupleurum chinense farnesyl diphosphate synthase (FPS) mRNA, complete cds}	{PF05649:Peptidase family M13 PF02866:lactate/malate dehydrogenase, alpha/beta C-terminal domain PF00348:Polyprenyl synthetase}
i1_HQ_SD_c17869/f5p0/1681	BfSS7974	{ACX42426.1; squalene synthase [Bupleurum chinense]}	{sp|P53800|FDFT_NICBE; Squalene synthase OS=Nicotiana benthamiana OX=4100 PE=2 SV=1}	{jcu:105630097; K00801 FDFT1 farnesyl-diphosphate farnesyltransferase 2.5.1.21 ko00100; Metabolism; Lipid metabolism; Steroid biosynthesis | ko00909; Metabolism; Metabolism of terpenoids and polyketides; Sesquiterpenoid and triterpenoid biosynthesis}	{At4g34640; KOG1459 Squalene synthetase I Lipid transport and metabolism ;}	{GO:0009058; biosynthetic process; biological_process GO:0016740; transferase activity; molecular_function}	{GQ889266.1; Bupleurum chinense clone bcSS1 squalene synthase mRNA, complete cds, alternatively spliced}	{PF00494:Squalene/phytoene synthase}
i2_HQ_SD_c20498/f3p1/2723	BfSS31645	{ACX42426.1; squalene synthase [Bupleurum chinense]}	{sp|P53800|FDFT_NICBE; Squalene synthase OS=Nicotiana benthamiana OX=4100 PE=2 SV=1}	{jcu:105630097; K00801 FDFT1 farnesyl-diphosphate farnesyltransferase 2.5.1.21 ko00100; Metabolism; Lipid metabolism; Steroid biosynthesis | ko00909; Metabolism; Metabolism of terpenoids and polyketides; Sesquiterpenoid and triterpenoid biosynthesis}	{At4g34640; KOG1459 Squalene synthetase I Lipid transport and metabolism ;}	{GO:0009058; biosynthetic process; biological_process GO:0016740; transferase activity; molecular_function}	{GQ889268.1; Bupleurum chinense squalene synthase gene, complete cds, alternatively spliced}	{PF00494:Squalene/phytoene synthase}
i2_LQ_SD_c26635/f1p0/2682	BfSS43891	{XP_011088477.1; PREDICTED: squalene synthase-like [Sesamum indicum]}	{sp|P53799|FDFT1_ARATH; Squalene synthase 1 OS=Arabidopsis thaliana OX=3702 GN=SQS1 PE=1 SV=1}	{gra:105772833; K00801 FDFT1 farnesyl-diphosphate farnesyltransferase 2.5.1.21 ko00100; Metabolism; Lipid metabolism; Steroid biosynthesis | ko00909; Metabolism; Metabolism of terpenoids and polyketides; Sesquiterpenoid and triterpenoid biosynthesis}	{At4g34640; KOG1459 Squalene synthetase I Lipid transport and metabolism ;}	{GO:0016020; membrane; cellular_component GO:0006810; transport; biological_process GO:0005215; NA}	{GQ889268.1; Bupleurum chinense squalene synthase gene, complete cds, alternatively spliced}	{PF00854:POT family}
i2_LQ_SD_c51049/f1p1/2247	BfSS50562	{ACX42426.1; squalene synthase [Bupleurum chinense]}	{sp|P53800|FDFT_NICBE; Squalene synthase OS=Nicotiana benthamiana OX=4100 PE=2 SV=1}	{pop:POPTR_0004s16830g; K00801 FDFT1 farnesyl-diphosphate farnesyltransferase 2.5.1.21 ko00100; Metabolism; Lipid metabolism; Steroid biosynthesis | ko00909; Metabolism; Metabolism of terpenoids and polyketides; Sesquiterpenoid and triterpenoid biosynthesis}	{At4g34640; KOG1459 Squalene synthetase I Lipid transport and metabolism ;}	{GO:0009058; biosynthetic process; biological_process GO:0016740; transferase activity; molecular_function}	{AY964186.1; Bupleurum falcatum squalene synthase (SS1) mRNA, complete cds}	{PF00494:Squalene/phytoene synthase}
i2_LQ_SD_c54286/f1p1/2309	BfSS51885	{AAY46017.1; squalene synthase [Bupleurum falcatum]}	{sp|P53800|FDFT_NICBE; Squalene synthase OS=Nicotiana benthamiana OX=4100 PE=2 SV=1}	{vra:106756236; K00801 FDFT1 farnesyl-diphosphate farnesyltransferase 2.5.1.21 ko00100; Metabolism; Lipid metabolism; Steroid biosynthesis | ko00909; Metabolism; Metabolism of terpenoids and polyketides; Sesquiterpenoid and triterpenoid biosynthesis}	{At4g34640; KOG1459 Squalene synthetase I Lipid transport and metabolism ;}	{GO:0009058; biosynthetic process; biological_process GO:0016740; transferase activity; molecular_function}	{AY964186.1; Bupleurum falcatum squalene synthase (SS1) mRNA, complete cds}	{PF00494:Squalene/phytoene synthase}
i2_LQ_SD_c95403/f1p0/3004	BfSS63704	{KZM90807.1; hypothetical protein DCAR_021828 [Daucus carota subsp. sativus]}	{sp|P53799|FDFT1_ARATH; Squalene synthase 1 OS=Arabidopsis thaliana OX=3702 GN=SQS1 PE=1 SV=1}	{eus:EUTSA_v10025338mg; K00801 FDFT1 farnesyl-diphosphate farnesyltransferase 2.5.1.21 ko00100; Metabolism; Lipid metabolism; Steroid biosynthesis | ko00909; Metabolism; Metabolism of terpenoids and polyketides; Sesquiterpenoid and triterpenoid biosynthesis}	{At4g34640; KOG1459 Squalene synthetase I Lipid transport and metabolism ;}	{GO:0006810; transport; biological_process GO:0016020; membrane; cellular_component GO:0005215; NA}	{GQ889266.1; Bupleurum chinense clone bcSS1 squalene synthase mRNA, complete cds, alternatively spliced}	{PF00854:POT family}
i2_LQ_SD_c26398/f1p6/2677	BfSE43794	{XP_017248195.1; PREDICTED: squalene monooxygenase-like [Daucus carota subsp. sativus]}	{sp|Q9SM02|ERG14_ARATH; Squalene epoxidase 1 OS=Arabidopsis thaliana OX=3702 GN=SQE1 PE=1 SV=1}	{sind:105159079; K00511 SQLE, ERG1 squalene monooxygenase 1.14.14.17 ko00100; Metabolism; Lipid metabolism; Steroid biosynthesis | ko00909; Metabolism; Metabolism of terpenoids and polyketides; Sesquiterpenoid and triterpenoid biosynthesis}	{At1g58440; KOG1298 Squalene monooxygenase I Lipid transport and metabolism ;}	{NA}	{XM_017392706.1; PREDICTED: Daucus carota subsp. sativus squalene monooxygenase-like (LOC108219323), mRNA}	{NA}
i2_LQ_SD_c64715/f1p0/2037	BfSE55083	{XP_017242151.1; PREDICTED: squalene epoxidase 3-like [Daucus carota subsp. sativus]}	{sp|Q9SM02|ERG14_ARATH; Squalene epoxidase 1 OS=Arabidopsis thaliana OX=3702 GN=SQE1 PE=1 SV=1}	{ini:109177866; K00511 SQLE, ERG1 squalene monooxygenase 1.14.14.17 ko00100; Metabolism; Lipid metabolism; Steroid biosynthesis | ko00909; Metabolism; Metabolism of terpenoids and polyketides; Sesquiterpenoid and triterpenoid biosynthesis}	{At1g58440; KOG1298 Squalene monooxygenase I Lipid transport and metabolism ;}	{GO:0016616; oxidoreductase activity, acting on the CH-OH group of donors, NAD or NADP as acceptor; molecular_function GO:0016491; oxidoreductase activity; molecular_function GO:0055114; oxidation-reduction process; biological_process GO:0006631; fatty acid metabolic process; biological_process GO:0016021; integral to membrane; cellular_component GO:0071949; FAD binding; molecular_function GO:005…	{XM_017386662.1; PREDICTED: Daucus carota subsp. sativus squalene epoxidase 3-like (LOC108214582), mRNA}	{PF01494:FAD binding domain PF07992:Pyridine nucleotide-disulphide oxidoreductase PF01134:Glucose inhibited division protein A PF02558:Ketopantoate reductase PanE/ApbA PF01210:NAD-dependent glycerol-3-phosphate dehydrogenase N-terminus PF01266:FAD dependent oxidoreductase PF00070:Pyridine nucleotide-disulphide oxidoreductase PF02737:3-hydroxyacyl-CoA dehydrogenase, NAD binding domain PF08491:Squa…
i2_LQ_SD_c69749/f1p0/2466	BfSE55875	{XP_017242151.1; PREDICTED: squalene epoxidase 3-like [Daucus carota subsp. sativus]}	{sp|Q9SM02|ERG14_ARATH; Squalene epoxidase 1 OS=Arabidopsis thaliana OX=3702 GN=SQE1 PE=1 SV=1}	{sbi:SORBI_01g042050; K00511 SQLE, ERG1 squalene monooxygenase 1.14.14.17 ko00100; Metabolism; Lipid metabolism; Steroid biosynthesis | ko00909; Metabolism; Metabolism of terpenoids and polyketides; Sesquiterpenoid and triterpenoid biosynthesis}	{At1g58440; KOG1298 Squalene monooxygenase I Lipid transport and metabolism ;}	{GO:0051287; NAD binding; molecular_function GO:0071949; FAD binding; molecular_function GO:0004506; squalene monooxygenase activity; molecular_function GO:0016021; integral to membrane; cellular_component GO:0006631; fatty acid metabolic process; biological_process GO:0055114; oxidation-reduction process; biological_process GO:0016491; oxidoreductase activity; molecular_function GO:0016616; oxid…	{XM_017386662.1; PREDICTED: Daucus carota subsp. sativus squalene epoxidase 3-like (LOC108214582), mRNA}	{PF01210:NAD-dependent glycerol-3-phosphate dehydrogenase N-terminus PF01266:FAD dependent oxidoreductase PF01134:Glucose inhibited division protein A PF02558:Ketopantoate reductase PanE/ApbA PF02737:3-hydroxyacyl-CoA dehydrogenase, NAD binding domain PF02254:TrkA-N domain PF12831:FAD dependent oxidoreductase PF00070:Pyridine nucleotide-disulphide oxidoreductase PF08491:Squalene epoxidase PF07992…
i3_HQ_SD_c16738/f8p0/3280	BfSE65081	{XP_017248195.1; PREDICTED: squalene monooxygenase-like [Daucus carota subsp. sativus]}	{sp|Q9SM02|ERG14_ARATH; Squalene epoxidase 1 OS=Arabidopsis thaliana OX=3702 GN=SQE1 PE=1 SV=1}	{sind:105159079; K00511 SQLE, ERG1 squalene monooxygenase 1.14.14.17 ko00100; Metabolism; Lipid metabolism; Steroid biosynthesis | ko00909; Metabolism; Metabolism of terpenoids and polyketides; Sesquiterpenoid and triterpenoid biosynthesis}	{At1g58440; KOG1298 Squalene monooxygenase I Lipid transport and metabolism ;}	{NA}	{XM_017392706.1; PREDICTED: Daucus carota subsp. sativus squalene monooxygenase-like (LOC108219323), mRNA}	{NA}
i3_HQ_SD_c18168/f2p0/3601	BfSE65202	{XP_017248195.1; PREDICTED: squalene monooxygenase-like [Daucus carota subsp. sativus]}	{sp|Q9SM02|ERG14_ARATH; Squalene epoxidase 1 OS=Arabidopsis thaliana OX=3702 GN=SQE1 PE=1 SV=1}	{sind:105159079; K00511 SQLE, ERG1 squalene monooxygenase 1.14.14.17 ko00100; Metabolism; Lipid metabolism; Steroid biosynthesis | ko00909; Metabolism; Metabolism of terpenoids and polyketides; Sesquiterpenoid and triterpenoid biosynthesis}	{At1g58440; KOG1298 Squalene monooxygenase I Lipid transport and metabolism ;}	{NA}	{XM_017392706.1; PREDICTED: Daucus carota subsp. sativus squalene monooxygenase-like (LOC108219323), mRNA}	{NA}
i3_LQ_SD_c3333/f1p0/3922	BfSE75562	{XP_017248195.1; PREDICTED: squalene monooxygenase-like [Daucus carota subsp. sativus]}	{sp|Q9SM02|ERG14_ARATH; Squalene epoxidase 1 OS=Arabidopsis thaliana OX=3702 GN=SQE1 PE=1 SV=1}	{sind:105159079; K00511 SQLE, ERG1 squalene monooxygenase 1.14.14.17 ko00100; Metabolism; Lipid metabolism; Steroid biosynthesis | ko00909; Metabolism; Metabolism of terpenoids and polyketides; Sesquiterpenoid and triterpenoid biosynthesis}	{At1g58440; KOG1298 Squalene monooxygenase I Lipid transport and metabolism ;}	{GO:0005515; protein binding; molecular_function}	{XM_017392706.1; PREDICTED: Daucus carota subsp. sativus squalene monooxygenase-like (LOC108219323), mRNA}	{PF00646:F-box domain PF12937:F-box-like}
i3_LQ_SD_c4928/f1p31/3937	BfSE81795	{XP_017248195.1; PREDICTED: squalene monooxygenase-like [Daucus carota subsp. sativus]}	{sp|Q9SM02|ERG14_ARATH; Squalene epoxidase 1 OS=Arabidopsis thaliana OX=3702 GN=SQE1 PE=1 SV=1}	{sind:105159079; K00511 SQLE, ERG1 squalene monooxygenase 1.14.14.17 ko00100; Metabolism; Lipid metabolism; Steroid biosynthesis | ko00909; Metabolism; Metabolism of terpenoids and polyketides; Sesquiterpenoid and triterpenoid biosynthesis}	{At1g58440; KOG1298 Squalene monooxygenase I Lipid transport and metabolism ;}	{GO:0005515; protein binding; molecular_function}	{XM_017392706.1; PREDICTED: Daucus carota subsp. sativus squalene monooxygenase-like (LOC108219323), mRNA}	{PF00646:F-box domain PF12937:F-box-like}
i4_LQ_SD_c32510/f1p0/4222	BfSE93210	{XP_017220560.1; PREDICTED: putative F-box/LRR-repeat protein 9 [Daucus carota subsp. sativus]}	{sp|Q9SM02|ERG14_ARATH; Squalene epoxidase 1 OS=Arabidopsis thaliana OX=3702 GN=SQE1 PE=1 SV=1}	{fve:101306417; - - - - -}	{At1g58440; KOG1298 Squalene monooxygenase I Lipid transport and metabolism ;}	{NA}	{XM_017392706.1; PREDICTED: Daucus carota subsp. sativus squalene monooxygenase-like (LOC108219323), mRNA}	{NA}
i4_LQ_SD_c94875/f1p6/4015	BfSE107602	{XP_017248195.1; PREDICTED: squalene monooxygenase-like [Daucus carota subsp. sativus]}	{sp|Q9SM02|ERG14_ARATH; Squalene epoxidase 1 OS=Arabidopsis thaliana OX=3702 GN=SQE1 PE=1 SV=1}	{sind:105159079; K00511 SQLE, ERG1 squalene monooxygenase 1.14.14.17 ko00100; Metabolism; Lipid metabolism; Steroid biosynthesis | ko00909; Metabolism; Metabolism of terpenoids and polyketides; Sesquiterpenoid and triterpenoid biosynthesis}	{At1g58440; KOG1298 Squalene monooxygenase I Lipid transport and metabolism ;}	{GO:0005515; protein binding; molecular_function}	{XM_017392706.1; PREDICTED: Daucus carota subsp. sativus squalene monooxygenase-like (LOC108219323), mRNA}	{PF00646:F-box domain PF12937:F-box-like}
i0_LQ_SD_c7711/f1p1/854	BfBAS6355	{ADM89633.1; beta-amyrin synthase [Bupleurum chinense]}	{sp|O82140|BAMS1_PANGI; Beta-Amyrin Synthase 1 OS=Panax ginseng OX=4054 GN=OSCPNY1 PE=1 SV=1}	{ini:109156437; K15813 LUP4 beta-amyrin synthase 5.4.99.39 ko00909; Metabolism; Metabolism of terpenoids and polyketides; Sesquiterpenoid and triterpenoid biosynthesis}	{At1g78950; KOG0497 Oxidosqualene-lanosterol cyclase and related proteins I Lipid transport and metabolism ;}	{GO:0005515; protein binding; molecular_function}	{HQ166837.1; Bupleurum chinense beta-amyrin synthase (BAS2) mRNA, complete cds}	{PF00023:Ankyrin repeat}
i1_LQ_SD_c3295/f1p5/1895	BfBAS18060	{ADM89633.1; beta-amyrin synthase [Bupleurum chinense]}	{sp|Q8W3Z1|BAMS_BETPL; Beta-amyrin synthase OS=Betula platyphylla OX=78630 GN=OSCBPY PE=1 SV=1}	{sind:105173656; K15813 LUP4 beta-amyrin synthase 5.4.99.39 ko00909; Metabolism; Metabolism of terpenoids and polyketides; Sesquiterpenoid and triterpenoid biosynthesis}	{At1g78950; KOG0497 Oxidosqualene-lanosterol cyclase and related proteins I Lipid transport and metabolism ;}	{NA}	{HQ166837.1; Bupleurum chinense beta-amyrin synthase (BAS2) mRNA, complete cds}	{NA}
i2_HQ_SD_c106517/f2p2/2846	BfBAS30056	{ABY90140.2; beta-amyrin synthase [Bupleurum chinense]}	{sp|O82146|BAMS2_PANGI; Beta-Amyrin Synthase 2 OS=Panax ginseng OX=4054 GN=OSCPNY2 PE=2 SV=1}	{sind:105173656; K15813 LUP4 beta-amyrin synthase 5.4.99.39 ko00909; Metabolism; Metabolism of terpenoids and polyketides; Sesquiterpenoid and triterpenoid biosynthesis}	{At1g78950; KOG0497 Oxidosqualene-lanosterol cyclase and related proteins I Lipid transport and metabolism ;}	{GO:0005615; extracellular space; cellular_component GO:0003824; NA}	{EU400220.2; Bupleurum chinense beta-amyrin synthase (BAS1) mRNA, complete cds}	{PF00432:Prenyltransferase and squalene oxidase repeat PF07678:A-macroglobulin complement component}
i2_HQ_SD_c118720/f8p2/2680	BfBAS30474	{ADM89633.1; beta-amyrin synthase [Bupleurum chinense]}	{sp|O82140|BAMS1_PANGI; Beta-Amyrin Synthase 1 OS=Panax ginseng OX=4054 GN=OSCPNY1 PE=1 SV=1}	{sind:105173656; K15813 LUP4 beta-amyrin synthase 5.4.99.39 ko00909; Metabolism; Metabolism of terpenoids and polyketides; Sesquiterpenoid and triterpenoid biosynthesis}	{At1g78950; KOG0497 Oxidosqualene-lanosterol cyclase and related proteins I Lipid transport and metabolism ;}	{GO:0003824; NA GO:0005615; extracellular space; cellular_component}	{HQ166837.1; Bupleurum chinense beta-amyrin synthase (BAS2) mRNA, complete cds}	{PF07678:A-macroglobulin complement component PF00432:Prenyltransferase and squalene oxidase repeat}
i2_LQ_SD_c111658/f1p3/2796	BfBAS37798	{ADM89633.1; beta-amyrin synthase [Bupleurum chinense]}	{sp|O82140|BAMS1_PANGI; Beta-Amyrin Synthase 1 OS=Panax ginseng OX=4054 GN=OSCPNY1 PE=1 SV=1}	{sind:105173656; K15813 LUP4 beta-amyrin synthase 5.4.99.39 ko00909; Metabolism; Metabolism of terpenoids and polyketides; Sesquiterpenoid and triterpenoid biosynthesis}	{At1g78950; KOG0497 Oxidosqualene-lanosterol cyclase and related proteins I Lipid transport and metabolism ;}	{GO:0003824; NA GO:0005615; extracellular space; cellular_component}	{HQ166837.1; Bupleurum chinense beta-amyrin synthase (BAS2) mRNA, complete cds}	{PF07678:A-macroglobulin complement component PF00432:Prenyltransferase and squalene oxidase repeat}
i2_LQ_SD_c20119/f1p3/2582	BfBAS41470	{ADM89633.1; beta-amyrin synthase [Bupleurum chinense]}	{sp|O82140|BAMS1_PANGI; Beta-Amyrin Synthase 1 OS=Panax ginseng OX=4054 GN=OSCPNY1 PE=1 SV=1}	{sind:105173656; K15813 LUP4 beta-amyrin synthase 5.4.99.39 ko00909; Metabolism; Metabolism of terpenoids and polyketides; Sesquiterpenoid and triterpenoid biosynthesis}	{At1g78950; KOG0497 Oxidosqualene-lanosterol cyclase and related proteins I Lipid transport and metabolism ;}	{GO:0005615; extracellular space; cellular_component GO:0003824; NA}	{AY514455.1; Bupleurum kaoi beta-armyrin synthase (BAS) mRNA, complete cds}	{PF07678:A-macroglobulin complement component PF00432:Prenyltransferase and squalene oxidase repeat}
i2_LQ_SD_c21216/f1p3/2711	BfBAS41878	{ADM89633.1; beta-amyrin synthase [Bupleurum chinense]}	{sp|O82140|BAMS1_PANGI; Beta-Amyrin Synthase 1 OS=Panax ginseng OX=4054 GN=OSCPNY1 PE=1 SV=1}	{sind:105173656; K15813 LUP4 beta-amyrin synthase 5.4.99.39 ko00909; Metabolism; Metabolism of terpenoids and polyketides; Sesquiterpenoid and triterpenoid biosynthesis}	{At1g78950; KOG0497 Oxidosqualene-lanosterol cyclase and related proteins I Lipid transport and metabolism ;}	{GO:0005615; extracellular space; cellular_component GO:0003824; NA}	{HQ166837.1; Bupleurum chinense beta-amyrin synthase (BAS2) mRNA, complete cds}	{PF07678:A-macroglobulin complement component PF00432:Prenyltransferase and squalene oxidase repeat}
i2_LQ_SD_c37515/f1p2/2669	BfBAS46879	{ABY90140.2; beta-amyrin synthase [Bupleurum chinense]}	{sp|O82146|BAMS2_PANGI; Beta-Amyrin Synthase 2 OS=Panax ginseng OX=4054 GN=OSCPNY2 PE=2 SV=1}	{sind:105173656; K15813 LUP4 beta-amyrin synthase 5.4.99.39 ko00909; Metabolism; Metabolism of terpenoids and polyketides; Sesquiterpenoid and triterpenoid biosynthesis}	{At1g78950; KOG0497 Oxidosqualene-lanosterol cyclase and related proteins I Lipid transport and metabolism ;}	{GO:0003824; NA GO:0005615; extracellular space; cellular_component}	{EU400220.2; Bupleurum chinense beta-amyrin synthase (BAS1) mRNA, complete cds}	{PF07678:A-macroglobulin complement component PF00432:Prenyltransferase and squalene oxidase repeat}
i2_LQ_SD_c43125/f1p3/2710	BfBAS49237	{ADM89633.1; beta-amyrin synthase [Bupleurum chinense]}	{sp|O82140|BAMS1_PANGI; Beta-Amyrin Synthase 1 OS=Panax ginseng OX=4054 GN=OSCPNY1 PE=1 SV=1}	{ini:109156437; K15813 LUP4 beta-amyrin synthase 5.4.99.39 ko00909; Metabolism; Metabolism of terpenoids and polyketides; Sesquiterpenoid and triterpenoid biosynthesis}	{At1g78950; KOG0497 Oxidosqualene-lanosterol cyclase and related proteins I Lipid transport and metabolism ;}	{GO:0005615; extracellular space; cellular_component GO:0003824; NA}	{HQ166837.1; Bupleurum chinense beta-amyrin synthase (BAS2) mRNA, complete cds}	{PF07678:A-macroglobulin complement component PF00432:Prenyltransferase and squalene oxidase repeat}
i2_LQ_SD_c4473/f1p2/2613	BfBAS49741	{ABY90140.2; beta-amyrin synthase [Bupleurum chinense]}	{sp|O82146|BAMS2_PANGI; Beta-Amyrin Synthase 2 OS=Panax ginseng OX=4054 GN=OSCPNY2 PE=2 SV=1}	{sind:105173656; K15813 LUP4 beta-amyrin synthase 5.4.99.39 ko00909; Metabolism; Metabolism of terpenoids and polyketides; Sesquiterpenoid and triterpenoid biosynthesis}	{At1g78950; KOG0497 Oxidosqualene-lanosterol cyclase and related proteins I Lipid transport and metabolism ;}	{GO:0005615; extracellular space; cellular_component GO:0003824; NA}	{EU400220.2; Bupleurum chinense beta-amyrin synthase (BAS1) mRNA, complete cds}	{PF00432:Prenyltransferase and squalene oxidase repeat PF07678:A-macroglobulin complement component}
i2_LQ_SD_c47233/f1p2/2050	BfBAS50159	{ADM89633.1; beta-amyrin synthase [Bupleurum chinense]}	{sp|O82140|BAMS1_PANGI; Beta-Amyrin Synthase 1 OS=Panax ginseng OX=4054 GN=OSCPNY1 PE=1 SV=1}	{sind:105173656; K15813 LUP4 beta-amyrin synthase 5.4.99.39 ko00909; Metabolism; Metabolism of terpenoids and polyketides; Sesquiterpenoid and triterpenoid biosynthesis}	{At1g78950; KOG0497 Oxidosqualene-lanosterol cyclase and related proteins I Lipid transport and metabolism ;}	{GO:0005615; extracellular space; cellular_component GO:0003824; NA}	{HQ166837.1; Bupleurum chinense beta-amyrin synthase (BAS2) mRNA, complete cds}	{PF00432:Prenyltransferase and squalene oxidase repeat PF07678:A-macroglobulin complement component}
i2_LQ_SD_c52728/f1p2/2960	BfBAS51221	{ABY90140.2; beta-amyrin synthase [Bupleurum chinense]}	{sp|O82146|BAMS2_PANGI; Beta-Amyrin Synthase 2 OS=Panax ginseng OX=4054 GN=OSCPNY2 PE=2 SV=1}	{sly:100529102; K15813 LUP4 beta-amyrin synthase 5.4.99.39 ko00909; Metabolism; Metabolism of terpenoids and polyketides; Sesquiterpenoid and triterpenoid biosynthesis}	{At1g78950; KOG0497 Oxidosqualene-lanosterol cyclase and related proteins I Lipid transport and metabolism ;}	{GO:0003824; NA}	{EU400220.2; Bupleurum chinense beta-amyrin synthase (BAS1) mRNA, complete cds}	{PF00432:Prenyltransferase and squalene oxidase repeat}
i2_LQ_SD_c89416/f1p3/2541	BfBAS61134	{ADM89633.1; beta-amyrin synthase [Bupleurum chinense]}	{sp|O82140|BAMS1_PANGI; Beta-Amyrin Synthase 1 OS=Panax ginseng OX=4054 GN=OSCPNY1 PE=1 SV=1}	{sind:105173656; K15813 LUP4 beta-amyrin synthase 5.4.99.39 ko00909; Metabolism; Metabolism of terpenoids and polyketides; Sesquiterpenoid and triterpenoid biosynthesis}	{At1g78950; KOG0497 Oxidosqualene-lanosterol cyclase and related proteins I Lipid transport and metabolism ;}	{GO:0005615; extracellular space; cellular_component GO:0003824; NA}	{HQ166837.1; Bupleurum chinense beta-amyrin synthase (BAS2) mRNA, complete cds}	{PF00432:Prenyltransferase and squalene oxidase repeat PF07678:A-macroglobulin complement component}
i3_LQ_SD_c24683/f1p28/3685	BfBAS72588	{ADM89633.1; beta-amyrin synthase [Bupleurum chinense]}	{sp|E7DN63|BAMS_SOLLC; Beta-amyrin synthase OS=Solanum lycopersicum OX=4081 GN=TTS1 PE=1 SV=1}	{sly:100529102; K15813 LUP4 beta-amyrin synthase 5.4.99.39 ko00909; Metabolism; Metabolism of terpenoids and polyketides; Sesquiterpenoid and triterpenoid biosynthesis}	{At1g78950; KOG0497 Oxidosqualene-lanosterol cyclase and related proteins I Lipid transport and metabolism ;}	{GO:0003824; NA}	{HQ166837.1; Bupleurum chinense beta-amyrin synthase (BAS2) mRNA, complete cds}	{PF00432:Prenyltransferase and squalene oxidase repeat}
i3_LQ_SD_c37360/f1p11/3207	BfBAS77002	{ADM89633.1; beta-amyrin synthase [Bupleurum chinense]}	{sp|O82140|BAMS1_PANGI; Beta-Amyrin Synthase 1 OS=Panax ginseng OX=4054 GN=OSCPNY1 PE=1 SV=1}	{sind:105173656; K15813 LUP4 beta-amyrin synthase 5.4.99.39 ko00909; Metabolism; Metabolism of terpenoids and polyketides; Sesquiterpenoid and triterpenoid biosynthesis}	{At1g78950; KOG0497 Oxidosqualene-lanosterol cyclase and related proteins I Lipid transport and metabolism ;}	{GO:0004129; cytochrome-c oxidase activity; molecular_function}	{HQ166837.1; Bupleurum chinense beta-amyrin synthase (BAS2) mRNA, complete cds}	{PF02285:Cytochrome oxidase c subunit VIII}
i3_LQ_SD_c3798/f1p3/3793	BfBAS77342	{ADM89633.1; beta-amyrin synthase [Bupleurum chinense]}	{sp|O82140|BAMS1_PANGI; Beta-Amyrin Synthase 1 OS=Panax ginseng OX=4054 GN=OSCPNY1 PE=1 SV=1}	{ini:109156437; K15813 LUP4 beta-amyrin synthase 5.4.99.39 ko00909; Metabolism; Metabolism of terpenoids and polyketides; Sesquiterpenoid and triterpenoid biosynthesis}	{At1g78950; KOG0497 Oxidosqualene-lanosterol cyclase and related proteins I Lipid transport and metabolism ;}	{GO:0003824; NA GO:0005615; extracellular space; cellular_component}	{HQ166837.1; Bupleurum chinense beta-amyrin synthase (BAS2) mRNA, complete cds}	{PF07678:A-macroglobulin complement component PF00432:Prenyltransferase and squalene oxidase repeat}
i3_LQ_SD_c8921/f1p13/3982	BfBAS83726	{ADM89633.1; beta-amyrin synthase [Bupleurum chinense]}	{sp|E7DN63|BAMS_SOLLC; Beta-amyrin synthase OS=Solanum lycopersicum OX=4081 GN=TTS1 PE=1 SV=1}	{sly:100529102; K15813 LUP4 beta-amyrin synthase 5.4.99.39 ko00909; Metabolism; Metabolism of terpenoids and polyketides; Sesquiterpenoid and triterpenoid biosynthesis}	{At1g78950; KOG0497 Oxidosqualene-lanosterol cyclase and related proteins I Lipid transport and metabolism ;}	{GO:0003824; NA}	{HQ166837.1; Bupleurum chinense beta-amyrin synthase (BAS2) mRNA, complete cds}	{PF00432:Prenyltransferase and squalene oxidase repeat}
i3_LQ_SD_c9279/f1p0/3203	BfBAS83891	{ADM89633.1; beta-amyrin synthase [Bupleurum chinense]}	{sp|O82140|BAMS1_PANGI; Beta-Amyrin Synthase 1 OS=Panax ginseng OX=4054 GN=OSCPNY1 PE=1 SV=1}	{sind:105173656; K15813 LUP4 beta-amyrin synthase 5.4.99.39 ko00909; Metabolism; Metabolism of terpenoids and polyketides; Sesquiterpenoid and triterpenoid biosynthesis}	{At1g78950; KOG0497 Oxidosqualene-lanosterol cyclase and related proteins I Lipid transport and metabolism ;}	{GO:0003824; NA}	{AY514455.1; Bupleurum kaoi beta-armyrin synthase (BAS) mRNA, complete cds}	{PF00432:Prenyltransferase and squalene oxidase repeat}
i4_LQ_SD_c8271/f1p2/4394	BfBAS106098	{ADM89633.1; beta-amyrin synthase [Bupleurum chinense]}	{sp|O82140|BAMS1_PANGI; Beta-Amyrin Synthase 1 OS=Panax ginseng OX=4054 GN=OSCPNY1 PE=1 SV=1}	{ini:109156437; K15813 LUP4 beta-amyrin synthase 5.4.99.39 ko00909; Metabolism; Metabolism of terpenoids and polyketides; Sesquiterpenoid and triterpenoid biosynthesis}	{At1g78950; KOG0497 Oxidosqualene-lanosterol cyclase and related proteins I Lipid transport and metabolism ;}	{GO:0005615; extracellular space; cellular_component GO:0003824; NA}	{HQ166837.1; Bupleurum chinense beta-amyrin synthase (BAS2) mRNA, complete cds}	{PF00432:Prenyltransferase and squalene oxidase repeat PF07678:A-macroglobulin complement component}
i4_LQ_SD_c88159/f1p1/4181	BfBAS106999	{ABY90140.2; beta-amyrin synthase [Bupleurum chinense]}	{sp|O82146|BAMS2_PANGI; Beta-Amyrin Synthase 2 OS=Panax ginseng OX=4054 GN=OSCPNY2 PE=2 SV=1}	{sind:105173656; K15813 LUP4 beta-amyrin synthase 5.4.99.39 ko00909; Metabolism; Metabolism of terpenoids and polyketides; Sesquiterpenoid and triterpenoid biosynthesis}	{At1g78950; KOG0497 Oxidosqualene-lanosterol cyclase and related proteins I Lipid transport and metabolism ;}	{NA}	{EU400220.2; Bupleurum chinense beta-amyrin synthase (BAS1) mRNA, complete cds}	{NA}
i5_LQ_SD_c19957/f1p1/5145	BfBAS111913	{XP_017229739.1; PREDICTED: dammarenediol II synthase-like [Daucus carota subsp. sativus]}	{sp|E7DN63|BAMS_SOLLC; Beta-amyrin synthase OS=Solanum lycopersicum OX=4081 GN=TTS1 PE=1 SV=1}	{sly:100529102; K15813 LUP4 beta-amyrin synthase 5.4.99.39 ko00909; Metabolism; Metabolism of terpenoids and polyketides; Sesquiterpenoid and triterpenoid biosynthesis}	{At1g78950; KOG0497 Oxidosqualene-lanosterol cyclase and related proteins I Lipid transport and metabolism ;}	{NA}	{XM_017374250.1; PREDICTED: Daucus carota subsp. sativus dammarenediol II synthase-like (LOC108204685), mRNA}	{NA}
i2_HQ_SD_c24318/f2p2/2624	BfBAS32029	{XP_017230789.1; PREDICTED: dammarenediol II synthase-like [Daucus carota subsp. sativus]}	{sp|Q08IT1|DADIS_PANGI; Dammarenediol II synthase OS=Panax ginseng OX=4054 GN=PNA PE=1 SV=1}	{ini:109174015; K15813 LUP4 beta-amyrin synthase 5.4.99.39 ko00909; Metabolism; Metabolism of terpenoids and polyketides; Sesquiterpenoid and triterpenoid biosynthesis}	{At1g78950; KOG0497 Oxidosqualene-lanosterol cyclase and related proteins I Lipid transport and metabolism ;}	{GO:0003824; NA GO:0005615; extracellular space; cellular_component}	{XM_017375300.1; PREDICTED: Daucus carota subsp. sativus dammarenediol II synthase-like (LOC108205363), mRNA}	{PF00432:Prenyltransferase and squalene oxidase repeat PF07678:A-macroglobulin complement component}
i2_LQ_SD_c12990/f1p3/3529	BfBAS39767	{XP_017223188.1; PREDICTED: cycloartenol Synthase-like isoform X2 [Daucus carota subsp. sativus]}	{sp|E2IUA7|GLUTS_KALDA; Glutinol synthase OS=Kalanchoe daigremontiana OX=23013 PE=1 SV=1}	{gmx:100810544; K15813 LUP4 beta-amyrin synthase 5.4.99.39 ko00909; Metabolism; Metabolism of terpenoids and polyketides; Sesquiterpenoid and triterpenoid biosynthesis}	{At1g78970; KOG0497 Oxidosqualene-lanosterol cyclase and related proteins I Lipid transport and metabolism ;}	{NA}	{AY514456.1; Bupleurum kaoi cycloartenol synthase (CAS) mRNA, complete cds}	{NA}
i2_LQ_SD_c28747/f1p2/2273	BfBAS44770	{XP_017230789.1; PREDICTED: dammarenediol II synthase-like [Daucus carota subsp. sativus]}	{sp|Q08IT1|DADIS_PANGI; Dammarenediol II synthase OS=Panax ginseng OX=4054 GN=PNA PE=1 SV=1}	{ini:109177996; K15813 LUP4 beta-amyrin synthase 5.4.99.39 ko00909; Metabolism; Metabolism of terpenoids and polyketides; Sesquiterpenoid and triterpenoid biosynthesis}	{At1g78950; KOG0497 Oxidosqualene-lanosterol cyclase and related proteins I Lipid transport and metabolism ;}	{GO:0005615; extracellular space; cellular_component GO:0003824; NA}	{XM_017375300.1; PREDICTED: Daucus carota subsp. sativus dammarenediol II synthase-like (LOC108205363), mRNA}	{PF00432:Prenyltransferase and squalene oxidase repeat PF07678:A-macroglobulin complement component}
i2_LQ_SD_c36276/f1p2/2307	BfBAS46430	{XP_017230789.1; PREDICTED: dammarenediol II synthase-like [Daucus carota subsp. sativus]}	{sp|Q08IT1|DADIS_PANGI; Dammarenediol II synthase OS=Panax ginseng OX=4054 GN=PNA PE=1 SV=1}	{ini:109177996; K15813 LUP4 beta-amyrin synthase 5.4.99.39 ko00909; Metabolism; Metabolism of terpenoids and polyketides; Sesquiterpenoid and triterpenoid biosynthesis}	{At1g78950; KOG0497 Oxidosqualene-lanosterol cyclase and related proteins I Lipid transport and metabolism ;}	{GO:0003824; NA GO:0005615; extracellular space; cellular_component}	{XM_017375300.1; PREDICTED: Daucus carota subsp. sativus dammarenediol II synthase-like (LOC108205363), mRNA}	{PF00432:Prenyltransferase and squalene oxidase repeat PF07678:A-macroglobulin complement component}
i2_LQ_SD_c41562/f1p2/2486	BfBAS48535	{XP_017230789.1; PREDICTED: dammarenediol II synthase-like [Daucus carota subsp. sativus]}	{sp|Q08IT1|DADIS_PANGI; Dammarenediol II synthase OS=Panax ginseng OX=4054 GN=PNA PE=1 SV=1}	{ini:109177996; K15813 LUP4 beta-amyrin synthase 5.4.99.39 ko00909; Metabolism; Metabolism of terpenoids and polyketides; Sesquiterpenoid and triterpenoid biosynthesis}	{At1g78960; KOG0497 Oxidosqualene-lanosterol cyclase and related proteins I Lipid transport and metabolism ;}	{GO:0003824; NA GO:0005615; extracellular space; cellular_component}	{XM_017375300.1; PREDICTED: Daucus carota subsp. sativus dammarenediol II synthase-like (LOC108205363), mRNA}	{PF00432:Prenyltransferase and squalene oxidase repeat PF07678:A-macroglobulin complement component}
i2_LQ_SD_c51308/f1p0/2565	BfBAS50660	{XP_017236325.1; PREDICTED: dammarenediol II synthase-like isoform X1 [Daucus carota subsp. sativus]}	{sp|Q08IT1|DADIS_PANGI; Dammarenediol II synthase OS=Panax ginseng OX=4054 GN=PNA PE=1 SV=1}	{ini:109174015; K15813 LUP4 beta-amyrin synthase 5.4.99.39 ko00909; Metabolism; Metabolism of terpenoids and polyketides; Sesquiterpenoid and triterpenoid biosynthesis}	{At1g78960; KOG0497 Oxidosqualene-lanosterol cyclase and related proteins I Lipid transport and metabolism ;}	{NA}	{XM_016341728.1; PREDICTED: Arachis ipaensis serine/arginine-rich SC35-like splicing factor SCL33 (LOC107638450), mRNA}	{NA}
i2_LQ_SD_c58601/f1p2/2935	BfBAS53726	{XP_017230789.1; PREDICTED: dammarenediol II synthase-like [Daucus carota subsp. sativus]}	{sp|Q08IT1|DADIS_PANGI; Dammarenediol II synthase OS=Panax ginseng OX=4054 GN=PNA PE=1 SV=1}	{ini:109178070; K15813 LUP4 beta-amyrin synthase 5.4.99.39 ko00909; Metabolism; Metabolism of terpenoids and polyketides; Sesquiterpenoid and triterpenoid biosynthesis}	{At1g78950; KOG0497 Oxidosqualene-lanosterol cyclase and related proteins I Lipid transport and metabolism ;}	{GO:0003824; NA GO:0005615; extracellular space; cellular_component}	{XM_017375300.1; PREDICTED: Daucus carota subsp. sativus dammarenediol II synthase-like (LOC108205363), mRNA}	{PF00432:Prenyltransferase and squalene oxidase repeat PF07678:A-macroglobulin complement component}
i2_LQ_SD_c77024/f1p1/2718	BfBAS58982	{XP_017230789.1; PREDICTED: dammarenediol II synthase-like [Daucus carota subsp. sativus]}	{sp|Q08IT1|DADIS_PANGI; Dammarenediol II synthase OS=Panax ginseng OX=4054 GN=PNA PE=1 SV=1}	{ini:109177996; K15813 LUP4 beta-amyrin synthase 5.4.99.39 ko00909; Metabolism; Metabolism of terpenoids and polyketides; Sesquiterpenoid and triterpenoid biosynthesis}	{At1g78950; KOG0497 Oxidosqualene-lanosterol cyclase and related proteins I Lipid transport and metabolism ;}	{GO:0005615; extracellular space; cellular_component GO:0003824; NA}	{XM_017375300.1; PREDICTED: Daucus carota subsp. sativus dammarenediol II synthase-like (LOC108205363), mRNA}	{PF00432:Prenyltransferase and squalene oxidase repeat PF07678:A-macroglobulin complement component}
i3_LQ_SD_c30784/f1p0/3013	BfBAS75205	{XP_017230789.1; PREDICTED: dammarenediol II synthase-like [Daucus carota subsp. sativus]}	{sp|E2IUA6|TARS_KALDA; Taraxerol synthase OS=Kalanchoe daigremontiana OX=23013 PE=1 SV=1}	{sind:105173656; K15813 LUP4 beta-amyrin synthase 5.4.99.39 ko00909; Metabolism; Metabolism of terpenoids and polyketides; Sesquiterpenoid and triterpenoid biosynthesis}	{At1g78950; KOG0497 Oxidosqualene-lanosterol cyclase and related proteins I Lipid transport and metabolism ;}	{NA}	{XM_017375300.1; PREDICTED: Daucus carota subsp. sativus dammarenediol II synthase-like (LOC108205363), mRNA}	{NA}
i3_LQ_SD_c8258/f1p14/3508	BfBAS83472	{XP_017230789.1; PREDICTED: dammarenediol II synthase-like [Daucus carota subsp. sativus]}	{sp|Q08IT1|DADIS_PANGI; Dammarenediol II synthase OS=Panax ginseng OX=4054 GN=PNA PE=1 SV=1}	{ini:109178070; K15813 LUP4 beta-amyrin synthase 5.4.99.39 ko00909; Metabolism; Metabolism of terpenoids and polyketides; Sesquiterpenoid and triterpenoid biosynthesis}	{At1g78950; KOG0497 Oxidosqualene-lanosterol cyclase and related proteins I Lipid transport and metabolism ;}	{NA}	{XM_017375300.1; PREDICTED: Daucus carota subsp. sativus dammarenediol II synthase-like (LOC108205363), mRNA}	{NA}
i4_LQ_SD_c26569/f1p0/4688	BfBAS91386	{XP_017230789.1; PREDICTED: dammarenediol II synthase-like [Daucus carota subsp. sativus]}	{sp|Q08IT1|DADIS_PANGI; Dammarenediol II synthase OS=Panax ginseng OX=4054 GN=PNA PE=1 SV=1}	{ini:109177996; K15813 LUP4 beta-amyrin synthase 5.4.99.39 ko00909; Metabolism; Metabolism of terpenoids and polyketides; Sesquiterpenoid and triterpenoid biosynthesis}	{At1g66960; KOG0497 Oxidosqualene-lanosterol cyclase and related proteins I Lipid transport and metabolism ;}	{GO:0003824; NA}	{XM_017375300.1; PREDICTED: Daucus carota subsp. sativus dammarenediol II synthase-like (LOC108205363), mRNA}	{PF00432:Prenyltransferase and squalene oxidase repeat}
i4_LQ_SD_c61885/f1p0/4326	BfBAS100445	{AAS01523.1; putative beta-amyrin synthase [Centella asiatica]}	{sp|Q08IT1|DADIS_PANGI; Dammarenediol II synthase OS=Panax ginseng OX=4054 GN=PNA PE=1 SV=1}	{ini:109178070; K15813 LUP4 beta-amyrin synthase 5.4.99.39 ko00909; Metabolism; Metabolism of terpenoids and polyketides; Sesquiterpenoid and triterpenoid biosynthesis}	{At1g78950; KOG0497 Oxidosqualene-lanosterol cyclase and related proteins I Lipid transport and metabolism ;}	{NA}	{XM_017375300.1; PREDICTED: Daucus carota subsp. sativus dammarenediol II synthase-like (LOC108205363), mRNA}	{NA}
i4_LQ_SD_c7805/f1p0/4797	BfBAS104361	{XP_017230789.1; PREDICTED: dammarenediol II synthase-like [Daucus carota subsp. sativus]}	{sp|Q08IT1|DADIS_PANGI; Dammarenediol II synthase OS=Panax ginseng OX=4054 GN=PNA PE=1 SV=1}	{ini:109178070; K15813 LUP4 beta-amyrin synthase 5.4.99.39 ko00909; Metabolism; Metabolism of terpenoids and polyketides; Sesquiterpenoid and triterpenoid biosynthesis}	{At1g78960; KOG0497 Oxidosqualene-lanosterol cyclase and related proteins I Lipid transport and metabolism ;}	{NA}	{XM_017375300.1; PREDICTED: Daucus carota subsp. sativus dammarenediol II synthase-like (LOC108205363), mRNA}	{NA}
i4_LQ_SD_c81755/f1p1/4729	BfBAS105719	{XP_017230789.1; PREDICTED: dammarenediol II synthase-like [Daucus carota subsp. sativus]}	{sp|Q08IT1|DADIS_PANGI; Dammarenediol II synthase OS=Panax ginseng OX=4054 GN=PNA PE=1 SV=1}	{ini:109178070; K15813 LUP4 beta-amyrin synthase 5.4.99.39 ko00909; Metabolism; Metabolism of terpenoids and polyketides; Sesquiterpenoid and triterpenoid biosynthesis}	{At1g78960; KOG0497 Oxidosqualene-lanosterol cyclase and related proteins I Lipid transport and metabolism ;}	{NA}	{XM_017375300.1; PREDICTED: Daucus carota subsp. sativus dammarenediol II synthase-like (LOC108205363), mRNA}	{NA}
i4_LQ_SD_c94225/f1p1/4040	BfBAS107334	{XP_017230789.1; PREDICTED: dammarenediol II synthase-like [Daucus carota subsp. sativus]}	{sp|Q08IT1|DADIS_PANGI; Dammarenediol II synthase OS=Panax ginseng OX=4054 GN=PNA PE=1 SV=1}	{ini:109178070; K15813 LUP4 beta-amyrin synthase 5.4.99.39 ko00909; Metabolism; Metabolism of terpenoids and polyketides; Sesquiterpenoid and triterpenoid biosynthesis}	{At1g78960; KOG0497 Oxidosqualene-lanosterol cyclase and related proteins I Lipid transport and metabolism ;}	{NA}	{XM_017375300.1; PREDICTED: Daucus carota subsp. sativus dammarenediol II synthase-like (LOC108205363), mRNA}	{NA}
i6_LQ_SD_c4423/f1p2/6167	BfBAS122710	{XP_017230789.1; PREDICTED: dammarenediol II synthase-like [Daucus carota subsp. sativus]}	{sp|Q08IT1|DADIS_PANGI; Dammarenediol II synthase OS=Panax ginseng OX=4054 GN=PNA PE=1 SV=1}	{ini:109178070; K15813 LUP4 beta-amyrin synthase 5.4.99.39 ko00909; Metabolism; Metabolism of terpenoids and polyketides; Sesquiterpenoid and triterpenoid biosynthesis}	{At1g78960; KOG0497 Oxidosqualene-lanosterol cyclase and related proteins I Lipid transport and metabolism ;}	{GO:0015074; DNA integration; biological_process}	{XM_017375300.1; PREDICTED: Daucus carota subsp. sativus dammarenediol II synthase-like (LOC108205363), mRNA}	{PF00665:Integrase core domain PF13683:Integrase core domain}
i0_LQ_SD_c9075/f1p0/860	BfCYP6788	{XP_017218705.1; PREDICTED: beta-amyrin 28-oxidase-like [Daucus carota subsp. sativus]}	{sp|A5BFI4|C7A17_VITVI; Beta-amyrin 28-monooxygenase OS=Vitis vinifera OX=29760 GN=CYP716A17 PE=1 SV=2}	{sot:102594160; K20667 CYP716A beta-amyrin 28-monooxygenase 1.14.13.201 -}	{At5g36110; KOG0157 Cytochrome P450 CYP4/CYP19/CYP26 subfamilies QI Secondary metabolites biosynthesis, transport and catabolism ; Lipid transport and metabolism ;}	{NA}	{XM_017363216.1; PREDICTED: Daucus carota subsp. sativus beta-amyrin 28-oxidase-like (LOC108196107), mRNA}	{NA}
i1_HQ_SD_c1491/f6p0/1727	BfCYP7584	{XP_017218117.1; PREDICTED: beta-amyrin 28-oxidase-like [Daucus carota subsp. sativus]}	{sp|Q2MJ20|C7A12_MEDTR; Beta-amyrin 28-monooxygenase OS=Medicago truncatula OX=3880 GN=CYP716A12 PE=1 SV=1}	{sind:105177626; K20667 CYP716A beta-amyrin 28-monooxygenase 1.14.13.201 -}	{At5g36110; KOG0157 Cytochrome P450 CYP4/CYP19/CYP26 subfamilies QI Secondary metabolites biosynthesis, transport and catabolism ; Lipid transport and metabolism ;}	{GO:0016705; oxidoreductase activity, acting on paired donors, with incorporation or reduction of molecular oxygen; molecular_function GO:0055114; oxidation-reduction process; biological_process GO:0005506; iron ion binding; molecular_function GO:0020037; heme binding; molecular_function}	{XM_019328864.1; PREDICTED: Ipomoea nil beta-amyrin 28-oxidase-like (LOC109179364), mRNA}	{PF00067:Cytochrome P450}
i1_HQ_SD_c17727/f3p0/1663	BfCYP7912	{XP_017228855.1; PREDICTED: beta-amyrin 28-oxidase-like [Daucus carota subsp. sativus]}	{sp|Q2MJ20|C7A12_MEDTR; Beta-amyrin 28-monooxygenase OS=Medicago truncatula OX=3880 GN=CYP716A12 PE=1 SV=1}	{sind:105177626; K20667 CYP716A beta-amyrin 28-monooxygenase 1.14.13.201 -}	{At5g36110; KOG0157 Cytochrome P450 CYP4/CYP19/CYP26 subfamilies QI Secondary metabolites biosynthesis, transport and catabolism ; Lipid transport and metabolism ;}	{GO:0020037; heme binding; molecular_function GO:0016705; oxidoreductase activity, acting on paired donors, with incorporation or reduction of molecular oxygen; molecular_function GO:0005506; iron ion binding; molecular_function GO:0055114; oxidation-reduction process; biological_process}	{XM_017373366.1; PREDICTED: Daucus carota subsp. sativus beta-amyrin 28-oxidase-like (LOC108192226), mRNA}	{PF00067:Cytochrome P450}
i1_HQ_SD_c19206/f3p0/1713	BfCYP8119	{AHF45909.1; CYP716Y1 [Bupleurum falcatum]}	{sp|A5BfCYPI4|C7A17_VITVI; Beta-amyrin 28-monooxygenase OS=Vitis vinifera OX=29760 GN=CYP716A17 PE=1 SV=2}	{nnu:104593846; K20667 CYP716A beta-amyrin 28-monooxygenase 1.14.13.201 -}	{At5g36110; KOG0157 Cytochrome P450 CYP4/CYP19/CYP26 suBfCYPamilies QI Secondary metabolites biosynthesis, transport and catabolism ; Lipid transport and metabolism ;}	{GO:0005506; iron ion binding; molecular_function GO:0055114; oxidation-reduction process; biological_process GO:0016705; oxidoreductase activity, acting on paired donors, with incorporation or reduction of molecular oxygen; molecular_function GO:0020037; heme binding; molecular_function}	{KC963423.1; Bupleurum falcatum CYP716Y1 mRNA, complete cds}	{PF00067:Cytochrome P450}
i1_HQ_SD_c22678/f3p9/1777	BfCYP8452	{AHF45909.1; CYP716Y1 [Bupleurum falcatum]}	{sp|A5BfCYPI4|C7A17_VITVI; Beta-amyrin 28-monooxygenase OS=Vitis vinifera OX=29760 GN=CYP716A17 PE=1 SV=2}	{rcu:8282102; K20667 CYP716A beta-amyrin 28-monooxygenase 1.14.13.201 -}	{At5g36110; KOG0157 Cytochrome P450 CYP4/CYP19/CYP26 suBfCYPamilies QI Secondary metabolites biosynthesis, transport and catabolism ; Lipid transport and metabolism ;}	{GO:0020037; heme binding; molecular_function GO:0016705; oxidoreductase activity, acting on paired donors, with incorporation or reduction of molecular oxygen; molecular_function GO:0005506; iron ion binding; molecular_function GO:0055114; oxidation-reduction process; biological_process}	{XM_007023556.2; PREDICTED: Theobroma cacao beta-amyrin 28-oxidase (LOC18595548), mRNA}	{PF00067:Cytochrome P450}
i1_HQ_SD_c46002/f4p0/1828	BfCYP9801	{AHF45909.1; CYP716Y1 [Bupleurum falcatum]}	{sp|A5BfCYPI4|C7A17_VITVI; Beta-amyrin 28-monooxygenase OS=Vitis vinifera OX=29760 GN=CYP716A17 PE=1 SV=2}	{nnu:104593846; K20667 CYP716A beta-amyrin 28-monooxygenase 1.14.13.201 -}	{At5g36110; KOG0157 Cytochrome P450 CYP4/CYP19/CYP26 suBfCYPamilies QI Secondary metabolites biosynthesis, transport and catabolism ; Lipid transport and metabolism ;}	{GO:0055114; oxidation-reduction process; biological_process GO:0005506; iron ion binding; molecular_function GO:0016705; oxidoreductase activity, acting on paired donors, with incorporation or reduction of molecular oxygen; molecular_function GO:0020037; heme binding; molecular_function}	{XM_007023556.2; PREDICTED: Theobroma cacao beta-amyrin 28-oxidase (LOC18595548), mRNA}	{PF00067:Cytochrome P450}
i1_HQ_SD_c70050/f17p92/1803	BfCYP11063	{XP_017228855.1; PREDICTED: beta-amyrin 28-oxidase-like [Daucus carota subsp. sativus]}	{sp|Q2MJ20|C7A12_MEDTR; Beta-amyrin 28-monooxygenase OS=Medicago truncatula OX=3880 GN=CYP716A12 PE=1 SV=1}	{sind:105177626; K20667 CYP716A beta-amyrin 28-monooxygenase 1.14.13.201 -}	{At5g36110; KOG0157 Cytochrome P450 CYP4/CYP19/CYP26 subfamilies QI Secondary metabolites biosynthesis, transport and catabolism ; Lipid transport and metabolism ;}	{GO:0016705; oxidoreductase activity, acting on paired donors, with incorporation or reduction of molecular oxygen; molecular_function GO:0005506; iron ion binding; molecular_function GO:0055114; oxidation-reduction process; biological_process GO:0020037; heme binding; molecular_function}	{XM_017373366.1; PREDICTED: Daucus carota subsp. sativus beta-amyrin 28-oxidase-like (LOC108192226), mRNA}	{PF00067:Cytochrome P450}
i1_LQ_SD_c21014/f1p0/1439	BfCYP14650	{XP_017245199.1; PREDICTED: beta-amyrin 28-oxidase-like [Daucus carota subsp. sativus]}	{sp|Q2MJ20|C7A12_MEDTR; Beta-amyrin 28-monooxygenase OS=Medicago truncatula OX=3880 GN=CYP716A12 PE=1 SV=1}	{cann:107857111; - - - - -}	{At5g36110; KOG0157 Cytochrome P450 CYP4/CYP19/CYP26 subfamilies QI Secondary metabolites biosynthesis, transport and catabolism ; Lipid transport and metabolism ;}	{GO:0020037; heme binding; molecular_function GO:0016705; oxidoreductase activity, acting on paired donors, with incorporation or reduction of molecular oxygen; molecular_function GO:0005506; iron ion binding; molecular_function GO:0055114; oxidation-reduction process; biological_process}	{XM_019328864.1; PREDICTED: Ipomoea nil beta-amyrin 28-oxidase-like (LOC109179364), mRNA}	{PF00067:Cytochrome P450}
i1_LQ_SD_c23106/f1p16/1860	BfCYP15443	{AHF45909.1; CYP716Y1 [Bupleurum falcatum]}	{sp|A5BfCYPI4|C7A17_VITVI; Beta-amyrin 28-monooxygenase OS=Vitis vinifera OX=29760 GN=CYP716A17 PE=1 SV=2}	{sind:105161986; K20667 CYP716A beta-amyrin 28-monooxygenase 1.14.13.201 -}	{At5g36110; KOG0157 Cytochrome P450 CYP4/CYP19/CYP26 suBfCYPamilies QI Secondary metabolites biosynthesis, transport and catabolism ; Lipid transport and metabolism ;}	{GO:0020037; heme binding; molecular_function GO:0005634; nucleus; cellular_component GO:0003677; DNA binding; molecular_function GO:0005506; iron ion binding; molecular_function GO:0055114; oxidation-reduction process; biological_process GO:0003682; chromatin binding; molecular_function GO:0000775; chromosome, centromeric region; cellular_component GO:0016705; oxidoreductase activity, acting on …	{KC963423.1; Bupleurum falcatum CYP716Y1 mRNA, complete cds}	{PF09026:Centromere protein B dimerisation domain PF00067:Cytochrome P450}
i1_LQ_SD_c24369/f1p18/1924	BfCYP15904	{XP_017218705.1; PREDICTED: beta-amyrin 28-oxidase-like [Daucus carota subsp. sativus]}	{sp|A5BFI4|C7A17_VITVI; Beta-amyrin 28-monooxygenase OS=Vitis vinifera OX=29760 GN=CYP716A17 PE=1 SV=2}	{sot:102594160; K20667 CYP716A beta-amyrin 28-monooxygenase 1.14.13.201 -}	{At5g36110; KOG0157 Cytochrome P450 CYP4/CYP19/CYP26 subfamilies QI Secondary metabolites biosynthesis, transport and catabolism ; Lipid transport and metabolism ;}	{GO:0016705; oxidoreductase activity, acting on paired donors, with incorporation or reduction of molecular oxygen; molecular_function GO:0005506; iron ion binding; molecular_function GO:0055114; oxidation-reduction process; biological_process GO:0020037; heme binding; molecular_function}	{XM_017363216.1; PREDICTED: Daucus carota subsp. sativus beta-amyrin 28-oxidase-like (LOC108196107), mRNA}	{PF00067:Cytochrome P450}
i1_LQ_SD_c27643/f1p2/1778	BfCYP17211	{AHF45909.1; CYP716Y1 [Bupleurum falcatum]}	{sp|A5BfCYPI4|C7A17_VITVI; Beta-amyrin 28-monooxygenase OS=Vitis vinifera OX=29760 GN=CYP716A17 PE=1 SV=2}	{nnu:104593846; K20667 CYP716A beta-amyrin 28-monooxygenase 1.14.13.201 -}	{At5g36110; KOG0157 Cytochrome P450 CYP4/CYP19/CYP26 suBfCYPamilies QI Secondary metabolites biosynthesis, transport and catabolism ; Lipid transport and metabolism ;}	{GO:0020037; heme binding; molecular_function GO:0055114; oxidation-reduction process; biological_process GO:0005506; iron ion binding; molecular_function GO:0016705; oxidoreductase activity, acting on paired donors, with incorporation or reduction of molecular oxygen; molecular_function}	{XM_007023556.2; PREDICTED: Theobroma cacao beta-amyrin 28-oxidase (LOC18595548), mRNA}	{PF00067:Cytochrome P450}
i1_LQ_SD_c40912/f1p0/1889	BfCYP21490	{AHF45909.1; CYP716Y1 [Bupleurum falcatum]}	{sp|A5BfCYPI4|C7A17_VITVI; Beta-amyrin 28-monooxygenase OS=Vitis vinifera OX=29760 GN=CYP716A17 PE=1 SV=2}	{nnu:104593846; K20667 CYP716A beta-amyrin 28-monooxygenase 1.14.13.201 -}	{At5g36110; KOG0157 Cytochrome P450 CYP4/CYP19/CYP26 suBfCYPamilies QI Secondary metabolites biosynthesis, transport and catabolism ; Lipid transport and metabolism ;}	{GO:0020037; heme binding; molecular_function GO:0003677; DNA binding; molecular_function GO:0005506; iron ion binding; molecular_function GO:0055114; oxidation-reduction process; biological_process GO:0005634; nucleus; cellular_component GO:0003682; chromatin binding; molecular_function GO:0016705; oxidoreductase activity, acting on paired donors, with incorporation or reduction of molecular oxy…	{KC963423.1; Bupleurum falcatum CYP716Y1 mRNA, complete cds}	{PF09026:Centromere protein B dimerisation domain PF00067:Cytochrome P450}
i1_LQ_SD_c41452/f1p4/1723	BfCYP21721	{XP_017218705.1; PREDICTED: beta-amyrin 28-oxidase-like [Daucus carota subsp. sativus]}	{sp|F6H9N6|C7A15_VITVI; Beta-amyrin 28-monooxygenase OS=Vitis vinifera OX=29760 GN=CYP716A15 PE=1 SV=1}	{sot:102594160; K20667 CYP716A beta-amyrin 28-monooxygenase 1.14.13.201 -}	{At5g36110; KOG0157 Cytochrome P450 CYP4/CYP19/CYP26 subfamilies QI Secondary metabolites biosynthesis, transport and catabolism ; Lipid transport and metabolism ;}	{GO:0016705; oxidoreductase activity, acting on paired donors, with incorporation or reduction of molecular oxygen; molecular_function GO:0055114; oxidation-reduction process; biological_process GO:0005506; iron ion binding; molecular_function GO:0020037; heme binding; molecular_function}	{XM_017363216.1; PREDICTED: Daucus carota subsp. sativus beta-amyrin 28-oxidase-like (LOC108196107), mRNA}	{PF00067:Cytochrome P450}
i1_LQ_SD_c48674/f1p0/1628	BfCYP22891	{AHF45909.1; CYP716Y1 [Bupleurum falcatum]}	{sp|A5BfCYPI4|C7A17_VITVI; Beta-amyrin 28-monooxygenase OS=Vitis vinifera OX=29760 GN=CYP716A17 PE=1 SV=2}	{nnu:104593846; K20667 CYP716A beta-amyrin 28-monooxygenase 1.14.13.201 -}	{At5g36110; KOG0157 Cytochrome P450 CYP4/CYP19/CYP26 suBfCYPamilies QI Secondary metabolites biosynthesis, transport and catabolism ; Lipid transport and metabolism ;}	{GO:0020037; heme binding; molecular_function GO:0055114; oxidation-reduction process; biological_process GO:0005506; iron ion binding; molecular_function GO:0016705; oxidoreductase activity, acting on paired donors, with incorporation or reduction of molecular oxygen; molecular_function}	{XM_007023556.2; PREDICTED: Theobroma cacao beta-amyrin 28-oxidase (LOC18595548), mRNA}	{PF00067:Cytochrome P450}
i1_LQ_SD_c50941/f1p0/1669	BfCYP23878	{KZM86682.1; hypothetical protein DCAR_023816 [Daucus carota subsp. sativus]}	{sp|F6H9N6|C7A15_VITVI; Beta-amyrin 28-monooxygenase OS=Vitis vinifera OX=29760 GN=CYP716A15 PE=1 SV=1}	{sot:102594160; K20667 CYP716A beta-amyrin 28-monooxygenase 1.14.13.201 -}	{At5g36110; KOG0157 Cytochrome P450 CYP4/CYP19/CYP26 subfamilies QI Secondary metabolites biosynthesis, transport and catabolism ; Lipid transport and metabolism ;}	{GO:0020037; heme binding; molecular_function GO:0016705; oxidoreductase activity, acting on paired donors, with incorporation or reduction of molecular oxygen; molecular_function GO:0005506; iron ion binding; molecular_function GO:0055114; oxidation-reduction process; biological_process}	{XM_017363216.1; PREDICTED: Daucus carota subsp. sativus beta-amyrin 28-oxidase-like (LOC108196107), mRNA}	{PF00067:Cytochrome P450}
i1_LQ_SD_c52032/f1p0/1791	BfCYP24366	{AHF45909.1; CYP716Y1 [Bupleurum falcatum]}	{sp|A5BfCYPI4|C7A17_VITVI; Beta-amyrin 28-monooxygenase OS=Vitis vinifera OX=29760 GN=CYP716A17 PE=1 SV=2}	{nnu:104593846; K20667 CYP716A beta-amyrin 28-monooxygenase 1.14.13.201 -}	{At5g36110; KOG0157 Cytochrome P450 CYP4/CYP19/CYP26 suBfCYPamilies QI Secondary metabolites biosynthesis, transport and catabolism ; Lipid transport and metabolism ;}	{GO:0020037; heme binding; molecular_function GO:0055114; oxidation-reduction process; biological_process GO:0005506; iron ion binding; molecular_function GO:0016705; oxidoreductase activity, acting on paired donors, with incorporation or reduction of molecular oxygen; molecular_function}	{KC963423.1; Bupleurum falcatum CYP716Y1 mRNA, complete cds}	{PF00067:Cytochrome P450}
i1_LQ_SD_c52277/f1p7/1683	BfCYP24494	{AHF45909.1; CYP716Y1 [Bupleurum falcatum]}	{sp|A5BfCYPI4|C7A17_VITVI; Beta-amyrin 28-monooxygenase OS=Vitis vinifera OX=29760 GN=CYP716A17 PE=1 SV=2}	{nnu:104593846; K20667 CYP716A beta-amyrin 28-monooxygenase 1.14.13.201 -}	{At5g36110; KOG0157 Cytochrome P450 CYP4/CYP19/CYP26 suBfCYPamilies QI Secondary metabolites biosynthesis, transport and catabolism ; Lipid transport and metabolism ;}	{GO:0055114; oxidation-reduction process; biological_process GO:0005506; iron ion binding; molecular_function GO:0016705; oxidoreductase activity, acting on paired donors, with incorporation or reduction of molecular oxygen; molecular_function GO:0020037; heme binding; molecular_function}	{XM_007023556.2; PREDICTED: Theobroma cacao beta-amyrin 28-oxidase (LOC18595548), mRNA}	{PF00067:Cytochrome P450}
i1_LQ_SD_c57122/f1p2/1727	BfCYP26634	{AHF45909.1; CYP716Y1 [Bupleurum falcatum]}	{sp|A5BfCYPI4|C7A17_VITVI; Beta-amyrin 28-monooxygenase OS=Vitis vinifera OX=29760 GN=CYP716A17 PE=1 SV=2}	{nnu:104593846; K20667 CYP716A beta-amyrin 28-monooxygenase 1.14.13.201 -}	{At5g36110; KOG0157 Cytochrome P450 CYP4/CYP19/CYP26 suBfCYPamilies QI Secondary metabolites biosynthesis, transport and catabolism ; Lipid transport and metabolism ;}	{GO:0020037; heme binding; molecular_function GO:0005634; nucleus; cellular_component GO:0003677; DNA binding; molecular_function GO:0055114; oxidation-reduction process; biological_process GO:0005506; iron ion binding; molecular_function GO:0003682; chromatin binding; molecular_function GO:0000775; chromosome, centromeric region; cellular_component GO:0016705; oxidoreductase activity, acting on …	{KC963423.1; Bupleurum falcatum CYP716Y1 mRNA, complete cds}	{PF09026:Centromere protein B dimerisation domain PF00067:Cytochrome P450}
i1_LQ_SD_c5820/f1p0/1783	BfCYP27078	{AHF45909.1; CYP716Y1 [Bupleurum falcatum]}	{sp|A5BfCYPI4|C7A17_VITVI; Beta-amyrin 28-monooxygenase OS=Vitis vinifera OX=29760 GN=CYP716A17 PE=1 SV=2}	{nnu:104593846; K20667 CYP716A beta-amyrin 28-monooxygenase 1.14.13.201 -}	{At5g36110; KOG0157 Cytochrome P450 CYP4/CYP19/CYP26 suBfCYPamilies QI Secondary metabolites biosynthesis, transport and catabolism ; Lipid transport and metabolism ;}	{GO:0016705; oxidoreductase activity, acting on paired donors, with incorporation or reduction of molecular oxygen; molecular_function GO:0000775; chromosome, centromeric region; cellular_component GO:0003682; chromatin binding; molecular_function GO:0005634; nucleus; cellular_component GO:0003677; DNA binding; molecular_function GO:0005506; iron ion binding; molecular_function GO:0055114; oxidat…	{KC963423.1; Bupleurum falcatum CYP716Y1 mRNA, complete cds}	{PF09026:Centromere protein B dimerisation domain PF00067:Cytochrome P450}
i1_LQ_SD_c66017/f1p0/1687	BfCYP27955	{AHF45909.1; CYP716Y1 [Bupleurum falcatum]}	{sp|A5BfCYPI4|C7A17_VITVI; Beta-amyrin 28-monooxygenase OS=Vitis vinifera OX=29760 GN=CYP716A17 PE=1 SV=2}	{rcu:8282886; K20667 CYP716A beta-amyrin 28-monooxygenase 1.14.13.201 -}	{At5g36110; KOG0157 Cytochrome P450 CYP4/CYP19/CYP26 suBfCYPamilies QI Secondary metabolites biosynthesis, transport and catabolism ; Lipid transport and metabolism ;}	{GO:0020037; heme binding; molecular_function GO:0003677; DNA binding; molecular_function GO:0005506; iron ion binding; molecular_function GO:0055114; oxidation-reduction process; biological_process GO:0005634; nucleus; cellular_component GO:0003682; chromatin binding; molecular_function GO:0000775; chromosome, centromeric region; cellular_component GO:0016705; oxidoreductase activity, acting on …	{KC963423.1; Bupleurum falcatum CYP716Y1 mRNA, complete cds}	{PF00067:Cytochrome P450 PF09026:Centromere protein B dimerisation domain}
i2_HQ_SD_c68964/f2p0/2481	BfCYP34221	{AHF45909.1; CYP716Y1 [Bupleurum falcatum]}	{sp|A5BfCYPI4|C7A17_VITVI; Beta-amyrin 28-monooxygenase OS=Vitis vinifera OX=29760 GN=CYP716A17 PE=1 SV=2}	{nnu:104593846; K20667 CYP716A beta-amyrin 28-monooxygenase 1.14.13.201 -}	{At5g36140; KOG0157 Cytochrome P450 CYP4/CYP19/CYP26 suBfCYPamilies QI Secondary metabolites biosynthesis, transport and catabolism ; Lipid transport and metabolism ;}	{GO:0005506; iron ion binding; molecular_function GO:0055114; oxidation-reduction process; biological_process GO:0016705; oxidoreductase activity, acting on paired donors, with incorporation or reduction of molecular oxygen; molecular_function GO:0020037; heme binding; molecular_function}	{KC963423.1; Bupleurum falcatum CYP716Y1 mRNA, complete cds}	{PF00067:Cytochrome P450}
i2_LQ_SD_c126132/f1p0/2007	BfCYP39602	{AHF45909.1; CYP716Y1 [Bupleurum falcatum]}	{sp|A5BfCYPI4|C7A17_VITVI; Beta-amyrin 28-monooxygenase OS=Vitis vinifera OX=29760 GN=CYP716A17 PE=1 SV=2}	{nnu:104593846; K20667 CYP716A beta-amyrin 28-monooxygenase 1.14.13.201 -}	{At5g36110; KOG0157 Cytochrome P450 CYP4/CYP19/CYP26 suBfCYPamilies QI Secondary metabolites biosynthesis, transport and catabolism ; Lipid transport and metabolism ;}	{GO:0000775; chromosome, centromeric region; cellular_component GO:0016705; oxidoreductase activity, acting on paired donors, with incorporation or reduction of molecular oxygen; molecular_function GO:0003682; chromatin binding; molecular_function GO:0003677; DNA binding; molecular_function GO:0005506; iron ion binding; molecular_function GO:0055114; oxidation-reduction process; biological_proces…	{KC963423.1; Bupleurum falcatum CYP716Y1 mRNA, complete cds}	{PF09026:Centromere protein B dimerisation domain PF00067:Cytochrome P450}
i2_LQ_SD_c27644/f1p0/2435	BfCYP44300	{XP_017228855.1; PREDICTED: beta-amyrin 28-oxidase-like [Daucus carota subsp. sativus]}	{sp|F6H9N6|C7A15_VITVI; Beta-amyrin 28-monooxygenase OS=Vitis vinifera OX=29760 GN=CYP716A15 PE=1 SV=1}	{sind:105161986; K20667 CYP716A beta-amyrin 28-monooxygenase 1.14.13.201 -}	{At5g40250; KOG0800 FOG: Predicted E3 ubiquitin ligase O Posttranslational modification, protein turnover, chaperones ;}	{GO:0016705; oxidoreductase activity, acting on paired donors, with incorporation or reduction of molecular oxygen; molecular_function GO:0005506; iron ion binding; molecular_function GO:0055114; oxidation-reduction process; biological_process GO:0020037; heme binding; molecular_function}	{XM_017362628.1; PREDICTED: Daucus carota subsp. sativus beta-amyrin 28-oxidase-like (LOC108195645), mRNA}	{PF00067:Cytochrome P450}
i2_LQ_SD_c33936/f1p2/1636	BfCYP45450	{AFK79029.1; cytochrome P450 CYP716A41 [Bupleurum chinense]}	{sp|Q2MJ20|C7A12_MEDTR; Beta-amyrin 28-monooxygenase OS=Medicago truncatula OX=3880 GN=CYP716A12 PE=1 SV=1}	{sind:105161986; K20667 CYP716A beta-amyrin 28-monooxygenase 1.14.13.201 -}	{At5g36110; KOG0157 Cytochrome P450 CYP4/CYP19/CYP26 suBfCYPamilies QI Secondary metabolites biosynthesis, transport and catabolism ; Lipid transport and metabolism ;}	{NA}	{JF803813.1; Bupleurum chinense cytochrome P450 CYP716A41 mRNA, complete cds}	{NA}
i2_LQ_SD_c37808/f1p2/1722	BfCYP46995	{AFK79029.1; cytochrome P450 CYP716A41 [Bupleurum chinense]}	{sp|Q2MJ20|C7A12_MEDTR; Beta-amyrin 28-monooxygenase OS=Medicago truncatula OX=3880 GN=CYP716A12 PE=1 SV=1}	{sind:105161986; K20667 CYP716A beta-amyrin 28-monooxygenase 1.14.13.201 -}	{At5g36110; KOG0157 Cytochrome P450 CYP4/CYP19/CYP26 suBfCYPamilies QI Secondary metabolites biosynthesis, transport and catabolism ; Lipid transport and metabolism ;}	{NA}	{JF803813.1; Bupleurum chinense cytochrome P450 CYP716A41 mRNA, complete cds}	{NA}
i2_LQ_SD_c57397/f1p0/2513	BfCYP53176	{AHF45909.1; CYP716Y1 [Bupleurum falcatum]}	{sp|A5BfCYPI4|C7A17_VITVI; Beta-amyrin 28-monooxygenase OS=Vitis vinifera OX=29760 GN=CYP716A17 PE=1 SV=2}	{nnu:104593846; K20667 CYP716A beta-amyrin 28-monooxygenase 1.14.13.201 -}	{At5g36140; KOG0157 Cytochrome P450 CYP4/CYP19/CYP26 suBfCYPamilies QI Secondary metabolites biosynthesis, transport and catabolism ; Lipid transport and metabolism ;}	{GO:0005506; iron ion binding; molecular_function GO:0055114; oxidation-reduction process; biological_process GO:0016705; oxidoreductase activity, acting on paired donors, with incorporation or reduction of molecular oxygen; molecular_function GO:0020037; heme binding; molecular_function}	{KC963423.1; Bupleurum falcatum CYP716Y1 mRNA, complete cds}	{PF00067:Cytochrome P450}
i2_LQ_SD_c5851/f1p1/2308	BfCYP53691	{XP_017226306.1; PREDICTED: beta-amyrin 28-oxidase-like [Daucus carota subsp. sativus]}	{sp|F6H9N6|C7A15_VITVI; Beta-amyrin 28-monooxygenase OS=Vitis vinifera OX=29760 GN=CYP716A15 PE=1 SV=1}	{sind:105177626; K20667 CYP716A beta-amyrin 28-monooxygenase 1.14.13.201 -}	{At5g36110; KOG0157 Cytochrome P450 CYP4/CYP19/CYP26 subfamilies QI Secondary metabolites biosynthesis, transport and catabolism ; Lipid transport and metabolism ;}	{NA}	{XM_017362628.1; PREDICTED: Daucus carota subsp. sativus beta-amyrin 28-oxidase-like (LOC108195645), mRNA}	{NA}
i3_LQ_SD_c23573/f1p1/3254	BfCYP72056	{XP_017228855.1; PREDICTED: beta-amyrin 28-oxidase-like [Daucus carota subsp. sativus]}	{sp|Q2MJ20|C7A12_MEDTR; Beta-amyrin 28-monooxygenase OS=Medicago truncatula OX=3880 GN=CYP716A12 PE=1 SV=1}	{sind:105177626; K20667 CYP716A beta-amyrin 28-monooxygenase 1.14.13.201 -}	{At5g36110; KOG0157 Cytochrome P450 CYP4/CYP19/CYP26 subfamilies QI Secondary metabolites biosynthesis, transport and catabolism ; Lipid transport and metabolism ;}	{GO:0020037; heme binding; molecular_function GO:0055114; oxidation-reduction process; biological_process GO:0005506; iron ion binding; molecular_function GO:0016705; oxidoreductase activity, acting on paired donors, with incorporation or reduction of molecular oxygen; molecular_function}	{XM_017362628.1; PREDICTED: Daucus carota subsp. sativus beta-amyrin 28-oxidase-like (LOC108195645), mRNA}	{PF00067:Cytochrome P450}
i5_LQ_SD_c27425/f1p1/5460	BfCYP115541	{XP_017245653.1; PREDICTED: beta-amyrin 28-oxidase-like, partial [Daucus carota subsp. sativus]}	{sp|Q2MJ20|C7A12_MEDTR; Beta-amyrin 28-monooxygenase OS=Medicago truncatula OX=3880 GN=CYP716A12 PE=1 SV=1}	{cann:107857111; - - - - -}	{At5g36110; KOG0157 Cytochrome P450 CYP4/CYP19/CYP26 subfamilies QI Secondary metabolites biosynthesis, transport and catabolism ; Lipid transport and metabolism ;}	{NA}	{XM_017390164.1; PREDICTED: Daucus carota subsp. sativus beta-amyrin 28-oxidase-like (LOC108217329), partial mRNA}	{NA}
i1_HQ_SD_c1189/f5p0/1699	BfCYP7239	{AFK79029.1; cytochrome P450 CYP716A41 [Bupleurum chinense]}	{sp|I7C6E8|C7A52_PANGI; Beta-amyrin 28-monooxygenase OS=Panax ginseng OX=4054 PE=1 SV=1}	{sot:102603547; K20667 CYP716A beta-amyrin 28-monooxygenase 1.14.13.201 -}	{At5g36110; KOG0157 Cytochrome P450 CYP4/CYP19/CYP26 suBfCYPamilies QI Secondary metabolites biosynthesis, transport and catabolism ; Lipid transport and metabolism ;}	{GO:0016705; oxidoreductase activity, acting on paired donors, with incorporation or reduction of molecular oxygen; molecular_function GO:0005506; iron ion binding; molecular_function GO:0055114; oxidation-reduction process; biological_process GO:0020037; heme binding; molecular_function}	{JF803813.1; Bupleurum chinense cytochrome P450 CYP716A41 mRNA, complete cds}	{PF00067:Cytochrome P450}
i1_HQ_SD_c17741/f2p0/1754	BfCYP7918	{AFK79029.1; cytochrome P450 CYP716A41 [Bupleurum chinense]}	{sp|I7C6E8|C7A52_PANGI; Beta-amyrin 28-monooxygenase OS=Panax ginseng OX=4054 PE=1 SV=1}	{sind:105161986; K20667 CYP716A beta-amyrin 28-monooxygenase 1.14.13.201 -}	{At5g36110; KOG0157 Cytochrome P450 CYP4/CYP19/CYP26 suBfCYPamilies QI Secondary metabolites biosynthesis, transport and catabolism ; Lipid transport and metabolism ;}	{GO:0020037; heme binding; molecular_function GO:0016705; oxidoreductase activity, acting on paired donors, with incorporation or reduction of molecular oxygen; molecular_function GO:0009271; phage shock; biological_process GO:0005506; iron ion binding; molecular_function GO:0055114; oxidation-reduction process; biological_process GO:0006355; regulation of transcription, DNA-dependent; biological…	{JF803813.1; Bupleurum chinense cytochrome P450 CYP716A41 mRNA, complete cds}	{PF00067:Cytochrome P450 PF06667:Phage shock protein B}
i1_HQ_SD_c27481/f2p1/1805	BfCYP8872	{XP_017246654.1; PREDICTED: beta-amyrin 28-oxidase-like [Daucus carota subsp. sativus]}	{sp|I7C6E8|C7A52_PANGI; Beta-amyrin 28-monooxygenase OS=Panax ginseng OX=4054 PE=1 SV=1}	{sind:105161986; K20667 CYP716A beta-amyrin 28-monooxygenase 1.14.13.201 -}	{At5g36110; KOG0157 Cytochrome P450 CYP4/CYP19/CYP26 subfamilies QI Secondary metabolites biosynthesis, transport and catabolism ; Lipid transport and metabolism ;}	{GO:0005506; iron ion binding; molecular_function GO:0055114; oxidation-reduction process; biological_process GO:0016705; oxidoreductase activity, acting on paired donors, with incorporation or reduction of molecular oxygen; molecular_function GO:0020037; heme binding; molecular_function}	{XM_010697832.2; PREDICTED: Beta vulgaris subsp. vulgaris beta-amyrin 28-oxidase (LOC104908688), mRNA}	{PF00067:Cytochrome P450}
i1_HQ_SD_c27520/f2p7/1690	BfCYP8875	{XP_017255319.1; PREDICTED: beta-amyrin 28-oxidase [Daucus carota subsp. sativus]}	{sp|I7C6E8|C7A52_PANGI; Beta-amyrin 28-monooxygenase OS=Panax ginseng OX=4054 PE=1 SV=1}	{sind:105161986; K20667 CYP716A beta-amyrin 28-monooxygenase 1.14.13.201 -}	{At5g36110; KOG0157 Cytochrome P450 CYP4/CYP19/CYP26 subfamilies QI Secondary metabolites biosynthesis, transport and catabolism ; Lipid transport and metabolism ;}	{GO:0016705; oxidoreductase activity, acting on paired donors, with incorporation or reduction of molecular oxygen; molecular_function GO:0055114; oxidation-reduction process; biological_process GO:0005506; iron ion binding; molecular_function GO:0020037; heme binding; molecular_function}	{XM_017399830.1; PREDICTED: Daucus carota subsp. sativus beta-amyrin 28-oxidase (LOC108225030), mRNA}	{PF00067:Cytochrome P450}
i1_HQ_SD_c35431/f3p1/1699	BfCYP9340	{AFK79029.1; cytochrome P450 CYP716A41 [Bupleurum chinense]}	{sp|I7C6E8|C7A52_PANGI; Beta-amyrin 28-monooxygenase OS=Panax ginseng OX=4054 PE=1 SV=1}	{sot:102603547; K20667 CYP716A beta-amyrin 28-monooxygenase 1.14.13.201 -}	{At5g36110; KOG0157 Cytochrome P450 CYP4/CYP19/CYP26 suBfCYPamilies QI Secondary metabolites biosynthesis, transport and catabolism ; Lipid transport and metabolism ;}	{GO:0020037; heme binding; molecular_function GO:0005789; endoplasmic reticulum membrane; cellular_component GO:0005506; iron ion binding; molecular_function GO:0055114; oxidation-reduction process; biological_process GO:0016705; oxidoreductase activity, acting on paired donors, with incorporation or reduction of molecular oxygen; molecular_function}	{JF803813.1; Bupleurum chinense cytochrome P450 CYP716A41 mRNA, complete cds}	{PF00067:Cytochrome P450 PF15168:Triple QxxK/R motif-containing protein family}
i1_HQ_SD_c46412/f14p2/1842	BfCYP9868	{XP_017246654.1; PREDICTED: beta-amyrin 28-oxidase-like [Daucus carota subsp. sativus]}	{sp|I7C6E8|C7A52_PANGI; Beta-amyrin 28-monooxygenase OS=Panax ginseng OX=4054 PE=1 SV=1}	{sind:105161986; K20667 CYP716A beta-amyrin 28-monooxygenase 1.14.13.201 -}	{At5g36110; KOG0157 Cytochrome P450 CYP4/CYP19/CYP26 subfamilies QI Secondary metabolites biosynthesis, transport and catabolism ; Lipid transport and metabolism ;}	{GO:0020037; heme binding; molecular_function GO:0016705; oxidoreductase activity, acting on paired donors, with incorporation or reduction of molecular oxygen; molecular_function GO:0055114; oxidation-reduction process; biological_process GO:0005506; iron ion binding; molecular_function}	{XM_010697832.2; PREDICTED: Beta vulgaris subsp. vulgaris beta-amyrin 28-oxidase (LOC104908688), mRNA}	{PF00067:Cytochrome P450}
i1_LQ_SD_c21977/f1p4/1555	BfCYP15020	{AFK79029.1; cytochrome P450 CYP716A41 [Bupleurum chinense]}	{sp|I7C6E8|C7A52_PANGI; Beta-amyrin 28-monooxygenase OS=Panax ginseng OX=4054 PE=1 SV=1}	{sot:102603547; K20667 CYP716A beta-amyrin 28-monooxygenase 1.14.13.201 -}	{At5g36110; KOG0157 Cytochrome P450 CYP4/CYP19/CYP26 suBfCYPamilies QI Secondary metabolites biosynthesis, transport and catabolism ; Lipid transport and metabolism ;}	{GO:0055114; oxidation-reduction process; biological_process GO:0005506; iron ion binding; molecular_function GO:0016705; oxidoreductase activity, acting on paired donors, with incorporation or reduction of molecular oxygen; molecular_function GO:0020037; heme binding; molecular_function}	{JF803813.1; Bupleurum chinense cytochrome P450 CYP716A41 mRNA, complete cds}	{PF00067:Cytochrome P450}
i1_LQ_SD_c23606/f1p4/1968	BfCYP15619	{AFK79029.1; cytochrome P450 CYP716A41 [Bupleurum chinense]}	{sp|I7C6E8|C7A52_PANGI; Beta-amyrin 28-monooxygenase OS=Panax ginseng OX=4054 PE=1 SV=1}	{sot:102603547; K20667 CYP716A beta-amyrin 28-monooxygenase 1.14.13.201 -}	{At5g36110; KOG0157 Cytochrome P450 CYP4/CYP19/CYP26 suBfCYPamilies QI Secondary metabolites biosynthesis, transport and catabolism ; Lipid transport and metabolism ;}	{GO:0005789; endoplasmic reticulum membrane; cellular_component GO:0020037; heme binding; molecular_function GO:0055114; oxidation-reduction process; biological_process GO:0005506; iron ion binding; molecular_function GO:0016705; oxidoreductase activity, acting on paired donors, with incorporation or reduction of molecular oxygen; molecular_function}	{JF803813.1; Bupleurum chinense cytochrome P450 CYP716A41 mRNA, complete cds}	{PF15168:Triple QxxK/R motif-containing protein family PF00067:Cytochrome P450}
i1_LQ_SD_c35886/f1p0/1732	BfCYP19328	{XP_009591188.1; PREDICTED: beta-amyrin 28-oxidase-like [Nicotiana tomentosiformis]}	{sp|I7C6E8|C7A52_PANGI; Beta-amyrin 28-monooxygenase OS=Panax ginseng OX=4054 PE=1 SV=1}	{sind:105161986; K20667 CYP716A beta-amyrin 28-monooxygenase 1.14.13.201 -}	{At5g36110; KOG0157 Cytochrome P450 CYP4/CYP19/CYP26 subfamilies QI Secondary metabolites biosynthesis, transport and catabolism ; Lipid transport and metabolism ;}	{GO:0020037; heme binding; molecular_function GO:0005506; iron ion binding; molecular_function GO:0055114; oxidation-reduction process; biological_process GO:0016705; oxidoreductase activity, acting on paired donors, with incorporation or reduction of molecular oxygen; molecular_function}	{XM_010697832.2; PREDICTED: Beta vulgaris subsp. vulgaris beta-amyrin 28-oxidase (LOC104908688), mRNA}	{PF00067:Cytochrome P450}
i1_LQ_SD_c53011/f1p0/1664	BfCYP24819	{AFK79029.1; cytochrome P450 CYP716A41 [Bupleurum chinense]}	{sp|I7C6E8|C7A52_PANGI; Beta-amyrin 28-monooxygenase OS=Panax ginseng OX=4054 PE=1 SV=1}	{sot:102603547; K20667 CYP716A beta-amyrin 28-monooxygenase 1.14.13.201 -}	{At5g36110; KOG0157 Cytochrome P450 CYP4/CYP19/CYP26 suBfCYPamilies QI Secondary metabolites biosynthesis, transport and catabolism ; Lipid transport and metabolism ;}	{GO:0020037; heme binding; molecular_function GO:0005506; iron ion binding; molecular_function GO:0055114; oxidation-reduction process; biological_process GO:0016705; oxidoreductase activity, acting on paired donors, with incorporation or reduction of molecular oxygen; molecular_function}	{JF803813.1; Bupleurum chinense cytochrome P450 CYP716A41 mRNA, complete cds}	{PF00067:Cytochrome P450}
i1_LQ_SD_c56373/f1p2/1896	BfCYP26298	{XP_017246654.1; PREDICTED: beta-amyrin 28-oxidase-like [Daucus carota subsp. sativus]}	{sp|I7C6E8|C7A52_PANGI; Beta-amyrin 28-monooxygenase OS=Panax ginseng OX=4054 PE=1 SV=1}	{sot:102603547; K20667 CYP716A beta-amyrin 28-monooxygenase 1.14.13.201 -}	{At5g36110; KOG0157 Cytochrome P450 CYP4/CYP19/CYP26 subfamilies QI Secondary metabolites biosynthesis, transport and catabolism ; Lipid transport and metabolism ;}	{GO:0020037; heme binding; molecular_function GO:0055114; oxidation-reduction process; biological_process GO:0005506; iron ion binding; molecular_function GO:0016705; oxidoreductase activity, acting on paired donors, with incorporation or reduction of molecular oxygen; molecular_function}	{XM_010697832.2; PREDICTED: Beta vulgaris subsp. vulgaris beta-amyrin 28-oxidase (LOC104908688), mRNA}	{PF00067:Cytochrome P450}
i1_LQ_SD_c57634/f1p0/1702	BfCYP26853	{AFK79029.1; cytochrome P450 CYP716A41 [Bupleurum chinense]}	{sp|I7C6E8|C7A52_PANGI; Beta-amyrin 28-monooxygenase OS=Panax ginseng OX=4054 PE=1 SV=1}	{sind:105161986; K20667 CYP716A beta-amyrin 28-monooxygenase 1.14.13.201 -}	{At5g36110; KOG0157 Cytochrome P450 CYP4/CYP19/CYP26 suBfCYPamilies QI Secondary metabolites biosynthesis, transport and catabolism ; Lipid transport and metabolism ;}	{GO:0020037; heme binding; molecular_function GO:0016705; oxidoreductase activity, acting on paired donors, with incorporation or reduction of molecular oxygen; molecular_function GO:0005506; iron ion binding; molecular_function GO:0055114; oxidation-reduction process; biological_process}	{JF803813.1; Bupleurum chinense cytochrome P450 CYP716A41 mRNA, complete cds}	{PF00067:Cytochrome P450}
i2_LQ_SD_c125515/f1p0/2011	BfCYP39377	{XP_016574734.1; PREDICTED: beta-amyrin 28-oxidase-like [Capsicum annuum]}	{sp|I7C6E8|C7A52_PANGI; Beta-amyrin 28-monooxygenase OS=Panax ginseng OX=4054 PE=1 SV=1}	{sind:105161986; K20667 CYP716A beta-amyrin 28-monooxygenase 1.14.13.201 -}	{At5g36110; KOG0157 Cytochrome P450 CYP4/CYP19/CYP26 subfamilies QI Secondary metabolites biosynthesis, transport and catabolism ; Lipid transport and metabolism ;}	{GO:0020037; heme binding; molecular_function GO:0016705; oxidoreductase activity, acting on paired donors, with incorporation or reduction of molecular oxygen; molecular_function GO:0005506; iron ion binding; molecular_function GO:0055114; oxidation-reduction process; biological_process}	{XM_010697832.2; PREDICTED: Beta vulgaris subsp. vulgaris beta-amyrin 28-oxidase (LOC104908688), mRNA}	{PF00067:Cytochrome P450}
i2_LQ_SD_c38722/f1p2/2205	BfCYP47356	{AFK79029.1; cytochrome P450 CYP716A41 [Bupleurum chinense]}	{sp|I7C6E8|C7A52_PANGI; Beta-amyrin 28-monooxygenase OS=Panax ginseng OX=4054 PE=1 SV=1}	{sot:102603547; K20667 CYP716A beta-amyrin 28-monooxygenase 1.14.13.201 -}	{At5g36110; KOG0157 Cytochrome P450 CYP4/CYP19/CYP26 suBfCYPamilies QI Secondary metabolites biosynthesis, transport and catabolism ; Lipid transport and metabolism ;}	{NA}	{JF803813.1; Bupleurum chinense cytochrome P450 CYP716A41 mRNA, complete cds}	{NA}
i2_LQ_SD_c43314/f1p3/2665	BfCYP49312	{AFK79029.1; cytochrome P450 CYP716A41 [Bupleurum chinense]}	{sp|I7C6E8|C7A52_PANGI; Beta-amyrin 28-monooxygenase OS=Panax ginseng OX=4054 PE=1 SV=1}	{sot:102603547; K20667 CYP716A beta-amyrin 28-monooxygenase 1.14.13.201 -}	{At5g36110; KOG0157 Cytochrome P450 CYP4/CYP19/CYP26 suBfCYPamilies QI Secondary metabolites biosynthesis, transport and catabolism ; Lipid transport and metabolism ;}	{GO:0019058; viral infectious cycle; biological_process}	{JF803813.1; Bupleurum chinense cytochrome P450 CYP716A41 mRNA, complete cds}	{PF04544:Herpesvirus egress protein UL20}
i3_LQ_SD_c36619/f1p0/3202	BfCYP76603	{XP_017255319.1; PREDICTED: beta-amyrin 28-oxidase [Daucus carota subsp. sativus]}	{sp|I7C6E8|C7A52_PANGI; Beta-amyrin 28-monooxygenase OS=Panax ginseng OX=4054 PE=1 SV=1}	{sind:105161986; K20667 CYP716A beta-amyrin 28-monooxygenase 1.14.13.201 -}	{At5g36110; KOG0157 Cytochrome P450 CYP4/CYP19/CYP26 subfamilies QI Secondary metabolites biosynthesis, transport and catabolism ; Lipid transport and metabolism ;}	{GO:0020037; heme binding; molecular_function GO:0005506; iron ion binding; molecular_function GO:0055114; oxidation-reduction process; biological_process GO:0016705; oxidoreductase activity, acting on paired donors, with incorporation or reduction of molecular oxygen; molecular_function}	{KT150521.1; Kalopanax septemlobus cytochrome P450 CYP716A94 mRNA, complete cds}	{PF00067:Cytochrome P450}
i4_LQ_SD_c47757/f1p7/4518	BfCYP97403	{XP_016501106.1; PREDICTED: beta-amyrin 28-oxidase-like [Nicotiana tabacum]}	{sp|I7C6E8|C7A52_PANGI; Beta-amyrin 28-monooxygenase OS=Panax ginseng OX=4054 PE=1 SV=1}	{sind:105161986; K20667 CYP716A beta-amyrin 28-monooxygenase 1.14.13.201 -}	{At5g36110; KOG0157 Cytochrome P450 CYP4/CYP19/CYP26 subfamilies QI Secondary metabolites biosynthesis, transport and catabolism ; Lipid transport and metabolism ;}	{GO:0020037; heme binding; molecular_function GO:0016705; oxidoreductase activity, acting on paired donors, with incorporation or reduction of molecular oxygen; molecular_function GO:0055114; oxidation-reduction process; biological_process GO:0005506; iron ion binding; molecular_function}	{XM_017399830.1; PREDICTED: Daucus carota subsp. sativus beta-amyrin 28-oxidase (LOC108225030), mRNA}	{PF00067:Cytochrome P450}
i0_LQ_SD_c4591/f1p469/899	BfCYP5435	{AHF45909.1; CYP716Y1 [Bupleurum falcatum]}	{sp|H2DH16|C7A47_PANGI; Dammarenediol 12-hydroxylase OS=Panax ginseng OX=4054 GN=PPDS PE=1 SV=2}	{rcu:8282102; K20667 CYP716A beta-amyrin 28-monooxygenase 1.14.13.201 -}	{At5g36110; KOG0157 Cytochrome P450 CYP4/CYP19/CYP26 suBfCYPamilies QI Secondary metabolites biosynthesis, transport and catabolism ; Lipid transport and metabolism ;}	{GO:0020037; heme binding; molecular_function GO:0005506; iron ion binding; molecular_function GO:0055114; oxidation-reduction process; biological_process GO:0016705; oxidoreductase activity, acting on paired donors, with incorporation or reduction of molecular oxygen; molecular_function}	{XM_016620019.1; PREDICTED: Nicotiana tabacum beta-amyrin 28-oxidase-like (LOC107797155), mRNA}	{PF00067:Cytochrome P450}
i0_HQ_SD_c14126/f2p5/306	BfCYP0246	{XP_017255162.1; PREDICTED: cytochrome P450 CYP736A12-like [Daucus carota subsp. sativus]}	{sp|H2DH18|C7A12_PANGI; Cytochrome P450 CYP736A12 OS=Panax ginseng OX=4054 PE=2 SV=1}	{cic:CICLE_v10025445mg; K20562 CYP736A biphenyl-4-hydroxylase - -}	{At4g36220; KOG0156 Cytochrome P450 CYP2 suBfCYPamily Q Secondary metabolites biosynthesis, transport and catabolism ;}	{NA}	{NA}	{NA}
i0_LQ_SD_c10811/f1p0/689	BfCYP1676	{KZN10015.1; hypothetical protein DCAR_002671 [Daucus carota subsp. sativus]}	{sp|H2DH19|C7D31_PANGI; Cytochrome P450 CYP71D312 OS=Panax ginseng OX=4054 PE=2 SV=1}	{sly:101262745; - - - - -}	{At3g26300; KOG0156 Cytochrome P450 CYP2 subfamily Q Secondary metabolites biosynthesis, transport and catabolism ;}	{GO:0055114; oxidation-reduction process; biological_process GO:0005506; iron ion binding; molecular_function GO:0016705; oxidoreductase activity, acting on paired donors, with incorporation or reduction of molecular oxygen; molecular_function GO:0020037; heme binding; molecular_function}	{XM_017359641.1; PREDICTED: Daucus carota subsp. sativus cytochrome P450 CYP71D312-like (LOC108193079), mRNA}	{PF00067:Cytochrome P450}
i0_LQ_SD_c20871/f1p0/801	BfCYP4075	{XP_017216160.1; PREDICTED: cytochrome P450 CYP72A219-like [Daucus carota subsp. sativus]}	{sp|H2DH21|C7A29_PANGI; Cytochrome P450 CYP72A219 OS=Panax ginseng OX=4054 PE=2 SV=1}	{cam:101500476; - - - - -}	{At3g14660; KOG0157 Cytochrome P450 CYP4/CYP19/CYP26 suBfCYPamilies QI Secondary metabolites biosynthesis, transport and catabolism ; Lipid transport and metabolism ;}	{GO:0055114; oxidation-reduction process; biological_process GO:0005506; iron ion binding; molecular_function GO:0016705; oxidoreductase activity, acting on paired donors, with incorporation or reduction of molecular oxygen; molecular_function GO:0020037; heme binding; molecular_function}	{NA}	{PF00067:Cytochrome P450}
i0_LQ_SD_c20905/f1p0/946	BfCYP4084	{XP_017223623.1; PREDICTED: cytochrome P450 CYP736A12-like [Daucus carota subsp. sativus]}	{sp|H2DH18|C7A12_PANGI; Cytochrome P450 CYP736A12 OS=Panax ginseng OX=4054 PE=2 SV=1}	{pxb:103929695; K20562 CYP736A biphenyl-4-hydroxylase - -}	{At2g45570; KOG0156 Cytochrome P450 CYP2 suBfCYPamily Q Secondary metabolites biosynthesis, transport and catabolism ;}	{GO:0020037; heme binding; molecular_function GO:0055114; oxidation-reduction process; biological_process GO:0005506; iron ion binding; molecular_function GO:0016705; oxidoreductase activity, acting on paired donors, with incorporation or reduction of molecular oxygen; molecular_function}	{XM_017368134.1; PREDICTED: Daucus carota subsp. sativus cytochrome P450 CYP736A12-like (LOC108200074), mRNA}	{PF00067:Cytochrome P450}
i0_LQ_SD_c6733/f1p0/652	BfCYP6061	{KZM94438.1; hypothetical protein DCAR_017681 [Daucus carota subsp. sativus]}	{sp|Q9LIP4|C71BX_ARATH; Cytochrome P450 71B36 OS=Arabidopsis thaliana OX=3702 GN=CYP71B36 PE=3 SV=1}	{cic:CICLE_v10027382mg; - - - - -}	{At3g26320; KOG0156 Cytochrome P450 CYP2 subfamily Q Secondary metabolites biosynthesis, transport and catabolism ;}	{GO:0020037; heme binding; molecular_function GO:0016705; oxidoreductase activity, acting on paired donors, with incorporation or reduction of molecular oxygen; molecular_function GO:0005506; iron ion binding; molecular_function GO:0055114; oxidation-reduction process; biological_process}	{XM_017394512.1; PREDICTED: Daucus carota subsp. sativus cytochrome P450 83B1-like (LOC108220672), mRNA}	{PF00067:Cytochrome P450}
i0_LQ_SD_c7261/f1p6/962	BfCYP6227	{XP_017224895.1; PREDICTED: cytochrome P450 89A2-like [Daucus carota subsp. sativus]}	{sp|Q42602|C89A2_ARATH; Cytochrome P450 89A2 OS=Arabidopsis thaliana OX=3702 GN=CYP89A2 PE=2 SV=2}	{spen:107014567; - - - - -}	{At2g12190; KOG0156 Cytochrome P450 CYP2 subfamily Q Secondary metabolites biosynthesis, transport and catabolism ;}	{GO:0020037; heme binding; molecular_function GO:0016705; oxidoreductase activity, acting on paired donors, with incorporation or reduction of molecular oxygen; molecular_function GO:0055114; oxidation-reduction process; biological_process GO:0005506; iron ion binding; molecular_function}	{XM_017369406.1; PREDICTED: Daucus carota subsp. sativus cytochrome P450 89A2-like (LOC108201098), mRNA}	{PF00067:Cytochrome P450}
i0_LQ_SD_c9226/f1p2/886	BfCYP6831	{XP_017634568.1; PREDICTED: cytochrome P450 81D1-like [Gossypium arboreum]}	{sp|Q9FG65|C81D1_ARATH; Cytochrome P450 81D1 OS=Arabidopsis thaliana OX=3702 GN=CYP81D1 PE=2 SV=1}	{jcu:105631013; - - - - -}	{At5g36220; KOG0156 Cytochrome P450 CYP2 subfamily Q Secondary metabolites biosynthesis, transport and catabolism ;}	{NA}	{NA}	{NA}
i0_LQ_SD_c9634/f1p0/922	BfCYP6943	{XP_017225579.1; PREDICTED: cytochrome P450 CYP71D313-like [Daucus carota subsp. sativus]}	{sp|H2DH20|C7D13_PANGI; Cytochrome P450 CYP71D313 OS=Panax ginseng OX=4054 PE=2 SV=1}	{gmx:100816377; - - - - -}	{At3g26300; KOG0156 Cytochrome P450 CYP2 suBfCYPamily Q Secondary metabolites biosynthesis, transport and catabolism ;}	{GO:0020037; heme binding; molecular_function GO:0005506; iron ion binding; molecular_function GO:0055114; oxidation-reduction process; biological_process GO:0016705; oxidoreductase activity, acting on paired donors, with incorporation or reduction of molecular oxygen; molecular_function}	{HQ439599.1; Lactuca sativa clone LsCOS costunolide synthase mRNA, complete cds}	{PF00067:Cytochrome P450}
i0_LQ_SD_c9972/f1p10/855	BfCYP7037	{KZM96387.1; hypothetical protein DCAR_019629 [Daucus carota subsp. sativus]}	{sp|Q9LUC5|C7A15_ARATH; Cytochrome P450 72A15 OS=Arabidopsis thaliana OX=3702 GN=CYP72A15 PE=2 SV=1}	{nnu:104610480; K09647 IMP1 mitochondrial inner membrane protease subunit 1 3.4.21.- ko03060; Genetic Information Processing; Folding, sorting and degradation; Protein export}	{At1g53530; KOG0171 Mitochondrial inner membrane protease, subunit IMP1 O Posttranslational modification, protein turnover, chaperones ;}	{NA}	{XM_017397711.1; PREDICTED: Daucus carota subsp. sativus mitochondrial inner membrane protease subunit 1 (LOC108223440), mRNA}	{NA}
i1_HQ_SD_c10009/f2p2/1735	BfCYP7042	{XP_017223623.1; PREDICTED: cytochrome P450 CYP736A12-like [Daucus carota subsp. sativus]}	{sp|H2DH18|C7A12_PANGI; Cytochrome P450 CYP736A12 OS=Panax ginseng OX=4054 PE=2 SV=1}	{pxb:103938668; - - - - -}	{At4g36220; KOG0156 Cytochrome P450 CYP2 suBfCYPamily Q Secondary metabolites biosynthesis, transport and catabolism ;}	{GO:0020037; heme binding; molecular_function GO:0016705; oxidoreductase activity, acting on paired donors, with incorporation or reduction of molecular oxygen; molecular_function GO:0055114; oxidation-reduction process; biological_process GO:0005506; iron ion binding; molecular_function}	{NA}	{PF00067:Cytochrome P450}
i1_HQ_SD_c10272/f2p29/1972	BfCYP7063	{XP_017221758.1; PREDICTED: cytochrome P450 76A1-like [Daucus carota subsp. sativus]}	{sp|P37122|C76A2_SOLME; Cytochrome P450 76A2 OS=Solanum melongena OX=4111 GN=CYP76A2 PE=2 SV=1}	{nta:107770519; - - - - -}	{At3g52970; KOG0156 Cytochrome P450 CYP2 subfamily Q Secondary metabolites biosynthesis, transport and catabolism ;}	{GO:0005506; iron ion binding; molecular_function GO:0055114; oxidation-reduction process; biological_process GO:0016705; oxidoreductase activity, acting on paired donors, with incorporation or reduction of molecular oxygen; molecular_function GO:0020037; heme binding; molecular_function}	{XM_017366269.1; PREDICTED: Daucus carota subsp. sativus cytochrome P450 76A1-like (LOC108198515), mRNA}	{PF00067:Cytochrome P450}
i1_HQ_SD_c11217/f4p0/1714	BfCYP7169	{XP_017225579.1; PREDICTED: cytochrome P450 CYP71D313-like [Daucus carota subsp. sativus]}	{sp|H2DH20|C7D13_PANGI; Cytochrome P450 CYP71D313 OS=Panax ginseng OX=4054 PE=2 SV=1}	{jcu:105633070; - - - - -}	{At5g25140; KOG0156 Cytochrome P450 CYP2 suBfCYPamily Q Secondary metabolites biosynthesis, transport and catabolism ;}	{GO:0055114; oxidation-reduction process; biological_process GO:0005506; iron ion binding; molecular_function GO:0016705; oxidoreductase activity, acting on paired donors, with incorporation or reduction of molecular oxygen; molecular_function GO:0020037; heme binding; molecular_function}	{XM_017370090.1; PREDICTED: Daucus carota subsp. sativus cytochrome P450 CYP71D313-like (LOC108201801), mRNA}	{PF00067:Cytochrome P450}
i1_HQ_SD_c12129/f6p2/1843	BfCYP7267	{XP_017223623.1; PREDICTED: cytochrome P450 CYP736A12-like [Daucus carota subsp. sativus]}	{sp|H2DH18|C7A12_PANGI; Cytochrome P450 CYP736A12 OS=Panax ginseng OX=4054 PE=2 SV=1}	{pxb:103929695; K20562 CYP736A biphenyl-4-hydroxylase - -}	{At5g07990; KOG0156 Cytochrome P450 CYP2 suBfCYPamily Q Secondary metabolites biosynthesis, transport and catabolism ;}	{GO:0020037; heme binding; molecular_function GO:0005506; iron ion binding; molecular_function GO:0055114; oxidation-reduction process; biological_process GO:0016705; oxidoreductase activity, acting on paired donors, with incorporation or reduction of molecular oxygen; molecular_function}	{XM_017584775.1; PREDICTED: Vigna angularis cytochrome P450 CYP736A12-like (LOC108345920), mRNA}	{PF00067:Cytochrome P450}
i1_HQ_SD_c1282/f14p5/1718	BfCYP7347	{ANO53926.1; p-coumaroyl shikimate/quinate 3'-hydroxylase 1 [Daucus carota subsp. carota]}	{sp|O22203|C98A3_ARATH; Cytochrome P450 98A3 OS=Arabidopsis thaliana OX=3702 GN=CYP98A3 PE=1 SV=1}	{nta:107767804; - - - - -}	{At2g40890; KOG0156 Cytochrome P450 CYP2 subfamily Q Secondary metabolites biosynthesis, transport and catabolism ;}	{GO:0020037; heme binding; molecular_function GO:0016705; oxidoreductase activity, acting on paired donors, with incorporation or reduction of molecular oxygen; molecular_function GO:0055114; oxidation-reduction process; biological_process GO:0005506; iron ion binding; molecular_function}	{XM_017402564.1; PREDICTED: Daucus carota subsp. sativus cytochrome P450 98A2 (LOC108227431), mRNA}	{PF00067:Cytochrome P450}
i1_HQ_SD_c13513/f3p3/1875	BfCYP7434	{XP_017248204.1; PREDICTED: cytochrome P450 CYP72A219-like [Daucus carota subsp. sativus]}	{sp|H2DH21|C7A29_PANGI; Cytochrome P450 CYP72A219 OS=Panax ginseng OX=4054 PE=2 SV=1}	{nta:107781087; - - - - -}	{At3g14610; KOG0157 Cytochrome P450 CYP4/CYP19/CYP26 suBfCYPamilies QI Secondary metabolites biosynthesis, transport and catabolism ; Lipid transport and metabolism ;}	{GO:0016705; oxidoreductase activity, acting on paired donors, with incorporation or reduction of molecular oxygen; molecular_function GO:0005506; iron ion binding; molecular_function GO:0055114; oxidation-reduction process; biological_process GO:0020037; heme binding; molecular_function}	{XM_017392715.1; PREDICTED: Daucus carota subsp. sativus cytochrome P450 CYP72A219-like (LOC108219329), mRNA}	{PF00067:Cytochrome P450}
i1_HQ_SD_c13924/f2p0/1902	BfCYP7490	{XP_017221758.1; PREDICTED: cytochrome P450 76A1-like [Daucus carota subsp. sativus]}	{sp|P37122|C76A2_SOLME; Cytochrome P450 76A2 OS=Solanum melongena OX=4111 GN=CYP76A2 PE=2 SV=1}	{nta:107770519; - - - - -}	{At3g52970; KOG0156 Cytochrome P450 CYP2 subfamily Q Secondary metabolites biosynthesis, transport and catabolism ;}	{GO:0055114; oxidation-reduction process; biological_process GO:0005506; iron ion binding; molecular_function GO:0016705; oxidoreductase activity, acting on paired donors, with incorporation or reduction of molecular oxygen; molecular_function GO:0020037; heme binding; molecular_function}	{XM_017364973.1; PREDICTED: Daucus carota subsp. sativus cytochrome P450 76A2-like (LOC108197375), transcript variant X2, mRNA}	{PF00067:Cytochrome P450}
i1_HQ_SD_c14349/f6p0/1806	BfCYP7539	{XP_017220992.1; PREDICTED: cytochrome P450 76A2-like [Daucus carota subsp. sativus]}	{sp|P37121|C76A1_SOLME; Cytochrome P450 76A1 (Fragment) OS=Solanum melongena OX=4111 GN=CYP76A1 PE=2 SV=1}	{nta:107775167; - - - - -}	{At3g52970; KOG0156 Cytochrome P450 CYP2 subfamily Q Secondary metabolites biosynthesis, transport and catabolism ;}	{GO:0016705; oxidoreductase activity, acting on paired donors, with incorporation or reduction of molecular oxygen; molecular_function GO:0005506; iron ion binding; molecular_function GO:0055114; oxidation-reduction process; biological_process GO:0020037; heme binding; molecular_function}	{XM_019240241.1; PREDICTED: Camelina sativa cytochrome P450 89A2-like (LOC109124924), mRNA}	{PF00067:Cytochrome P450}
i1_HQ_SD_c17415/f4p0/1918	BfCYP7793	{XP_017220992.1; PREDICTED: cytochrome P450 76A2-like [Daucus carota subsp. sativus]}	{sp|P37122|C76A2_SOLME; Cytochrome P450 76A2 OS=Solanum melongena OX=4111 GN=CYP76A2 PE=2 SV=1}	{nta:107775167; - - - - -}	{At3g52970; KOG0156 Cytochrome P450 CYP2 subfamily Q Secondary metabolites biosynthesis, transport and catabolism ;}	{GO:0020037; heme binding; molecular_function GO:0016705; oxidoreductase activity, acting on paired donors, with incorporation or reduction of molecular oxygen; molecular_function GO:0055114; oxidation-reduction process; biological_process GO:0005506; iron ion binding; molecular_function}	{XM_017364974.1; PREDICTED: Daucus carota subsp. sativus cytochrome P450 76A2-like (LOC108197376), mRNA}	{PF00067:Cytochrome P450}
i1_HQ_SD_c17418/f2p0/1857	BfCYP7796	{XP_017229157.1; PREDICTED: cytochrome P450 71B34-like isoform X3 [Daucus carota subsp. sativus]}	{sp|Q9LIP6|C71BV_ARATH; Cytochrome P450 71B34 OS=Arabidopsis thaliana OX=3702 GN=CYP71B34 PE=2 SV=1}	{vvi:100245779; - - - - -}	{At3g26300; KOG0156 Cytochrome P450 CYP2 subfamily Q Secondary metabolites biosynthesis, transport and catabolism ;}	{GO:0020037; heme binding; molecular_function GO:0016705; oxidoreductase activity, acting on paired donors, with incorporation or reduction of molecular oxygen; molecular_function GO:0005506; iron ion binding; molecular_function GO:0055114; oxidation-reduction process; biological_process}	{XM_017373673.1; PREDICTED: Daucus carota subsp. sativus cytochrome P450 71B34-like (LOC108204304), transcript variant X2, mRNA}	{PF00067:Cytochrome P450}
i1_HQ_SD_c17496/f2p0/1972	BfCYP7823	{XP_017255259.1; PREDICTED: cytochrome P450 78A5-like [Daucus carota subsp. sativus]}	{sp|Q9LMX7|C78A5_ARATH; Cytochrome P450 78A5 OS=Arabidopsis thaliana OX=3702 GN=CYP78A5 PE=2 SV=1}	{nnu:104597909; - - - - -}	{At1g74110; KOG0156 Cytochrome P450 CYP2 subfamily Q Secondary metabolites biosynthesis, transport and catabolism ;}	{GO:0055114; oxidation-reduction process; biological_process GO:0005506; iron ion binding; molecular_function GO:0016705; oxidoreductase activity, acting on paired donors, with incorporation or reduction of molecular oxygen; molecular_function GO:0020037; heme binding; molecular_function}	{XM_017399770.1; PREDICTED: Daucus carota subsp. sativus cytochrome P450 78A5-like (LOC108224990), mRNA}	{PF00067:Cytochrome P450}
i1_HQ_SD_c17881/f5p3/1936	BfCYP7978	{XP_017242067.1; PREDICTED: cytochrome P450 CYP72A219-like [Daucus carota subsp. sativus]}	{sp|H2DH21|C7A29_PANGI; Cytochrome P450 CYP72A219 OS=Panax ginseng OX=4054 PE=2 SV=1}	{cam:101500476; - - - - -}	{At3g14690; KOG0157 Cytochrome P450 CYP4/CYP19/CYP26 suBfCYPamilies QI Secondary metabolites biosynthesis, transport and catabolism ; Lipid transport and metabolism ;}	{GO:0016705; oxidoreductase activity, acting on paired donors, with incorporation or reduction of molecular oxygen; molecular_function GO:0005506; iron ion binding; molecular_function GO:0055114; oxidation-reduction process; biological_process GO:0003676; nucleic acid binding; molecular_function GO:0020037; heme binding; molecular_function}	{XM_017386578.1; PREDICTED: Daucus carota subsp. sativus cytochrome P450 CYP72A219-like (LOC108214533), mRNA}	{PF16251:Nucleic acid-binding domain (NAR) PF00067:Cytochrome P450}
i1_HQ_SD_c1839/f3p0/1861	BfCYP8036	{XP_017255512.1; PREDICTED: LOW QUALITY PROTEIN: cytochrome P450 94A1 [Daucus carota subsp. sativus]}	{sp|O81117|C94A1_VICSA; Cytochrome P450 94A1 OS=Vicia sativa OX=3908 GN=CYP94A1 PE=2 SV=2}	{sind:105155816; - - - - -}	{At3g56630; KOG0157 Cytochrome P450 CYP4/CYP19/CYP26 subfamilies QI Secondary metabolites biosynthesis, transport and catabolism ; Lipid transport and metabolism ;}	{GO:0020037; heme binding; molecular_function GO:0016705; oxidoreductase activity, acting on paired donors, with incorporation or reduction of molecular oxygen; molecular_function GO:0055114; oxidation-reduction process; biological_process GO:0005506; iron ion binding; molecular_function}	{XM_017400023.1; PREDICTED: Daucus carota subsp. sativus cytochrome P450 94A1 (LOC108225200), mRNA}	{PF00067:Cytochrome P450}
i1_HQ_SD_c1851/f4p71/1907	BfCYP8053	{AFK79030.1; cytochrome P450 CYP736A53 [Bupleurum chinense]}	{sp|H2DH18|C7A12_PANGI; Cytochrome P450 CYP736A12 OS=Panax ginseng OX=4054 PE=2 SV=1}	{pxb:103938668; - - - - -}	{At5g07990; KOG0156 Cytochrome P450 CYP2 suBfCYPamily Q Secondary metabolites biosynthesis, transport and catabolism ;}	{GO:0020037; heme binding; molecular_function GO:0005506; iron ion binding; molecular_function GO:0055114; oxidation-reduction process; biological_process GO:0016705; oxidoreductase activity, acting on paired donors, with incorporation or reduction of molecular oxygen; molecular_function}	{JF803814.1; Bupleurum chinense cytochrome P450 CYP736A53 mRNA, complete cds}	{PF00067:Cytochrome P450}
i1_HQ_SD_c18608/f2p0/1777	BfCYP8063	{XP_017245468.1; PREDICTED: cytochrome P450 76A1-like [Daucus carota subsp. sativus]}	{sp|P37122|C76A2_SOLME; Cytochrome P450 76A2 OS=Solanum melongena OX=4111 GN=CYP76A2 PE=2 SV=1}	{rcu:8274891; K20618 CYP76A cytochrome P450 family 76 subfamily A - -}	{At3g52970; KOG0156 Cytochrome P450 CYP2 subfamily Q Secondary metabolites biosynthesis, transport and catabolism ;}	{GO:0020037; heme binding; molecular_function GO:0005506; iron ion binding; molecular_function GO:0055114; oxidation-reduction process; biological_process GO:0016705; oxidoreductase activity, acting on paired donors, with incorporation or reduction of molecular oxygen; molecular_function}	{XM_017389979.1; PREDICTED: Daucus carota subsp. sativus cytochrome P450 76A1-like (LOC108217130), mRNA}	{PF00067:Cytochrome P450}
i1_HQ_SD_c19191/f2p18/1963	BfCYP8116	{XP_017258861.1; PREDICTED: cytochrome P450 CYP736A12-like [Daucus carota subsp. sativus]}	{sp|H2DH18|C7A12_PANGI; Cytochrome P450 CYP736A12 OS=Panax ginseng OX=4054 PE=2 SV=1}	{pxb:103938668; - - - - -}	{At3g26330; KOG0156 Cytochrome P450 CYP2 suBfCYPamily Q Secondary metabolites biosynthesis, transport and catabolism ;}	{GO:0005506; iron ion binding; molecular_function GO:0055114; oxidation-reduction process; biological_process GO:0016705; oxidoreductase activity, acting on paired donors, with incorporation or reduction of molecular oxygen; molecular_function GO:0020037; heme binding; molecular_function}	{XM_016027519.1; PREDICTED: Ziziphus jujuba cytochrome P450 CYP736A12-like (LOC107418833), mRNA}	{PF00067:Cytochrome P450}
i1_HQ_SD_c2060/f5p4/1732	BfCYP8247	{XP_017225579.1; PREDICTED: cytochrome P450 CYP71D313-like [Daucus carota subsp. sativus]}	{sp|H2DH20|C7D13_PANGI; Cytochrome P450 CYP71D313 OS=Panax ginseng OX=4054 PE=2 SV=1}	{jcu:105633070; - - - - -}	{At5g25140; KOG0156 Cytochrome P450 CYP2 suBfCYPamily Q Secondary metabolites biosynthesis, transport and catabolism ;}	{GO:0055114; oxidation-reduction process; biological_process GO:0005506; iron ion binding; molecular_function GO:0016705; oxidoreductase activity, acting on paired donors, with incorporation or reduction of molecular oxygen; molecular_function GO:0020037; heme binding; molecular_function}	{XM_017370090.1; PREDICTED: Daucus carota subsp. sativus cytochrome P450 CYP71D313-like (LOC108201801), mRNA}	{PF00067:Cytochrome P450}
i1_HQ_SD_c2178/f6p0/1944	BfCYP8346	{XP_017221758.1; PREDICTED: cytochrome P450 76A1-like [Daucus carota subsp. sativus]}	{sp|P37122|C76A2_SOLME; Cytochrome P450 76A2 OS=Solanum melongena OX=4111 GN=CYP76A2 PE=2 SV=1}	{nta:107770519; - - - - -}	{At3g52970; KOG0156 Cytochrome P450 CYP2 subfamily Q Secondary metabolites biosynthesis, transport and catabolism ;}	{GO:0055114; oxidation-reduction process; biological_process GO:0005506; iron ion binding; molecular_function GO:0016705; oxidoreductase activity, acting on paired donors, with incorporation or reduction of molecular oxygen; molecular_function GO:0020037; heme binding; molecular_function}	{XM_017366269.1; PREDICTED: Daucus carota subsp. sativus cytochrome P450 76A1-like (LOC108198515), mRNA}	{PF00067:Cytochrome P450}
i1_HQ_SD_c22021/f2p0/1647	BfCYP8369	{KVI04742.1; cytochrome P450 [Cynara cardunculus var. scolymus]}	{sp|B1GVX3|BOA3_BOTFB; Cytochrome P450 monooxygenase BOA3 OS=Botryotinia fuckeliana (strain B05.10) OX=332648 GN=BOA3 PE=2 SV=1}	{cic:CICLE_v10013315mg; K20618 CYP76A cytochrome P450 family 76 subfamily A - -}	{7292240; KOG0157 Cytochrome P450 CYP4/CYP19/CYP26 subfamilies QI Secondary metabolites biosynthesis, transport and catabolism ; Lipid transport and metabolism ;}	{GO:0020037; heme binding; molecular_function GO:0005506; iron ion binding; molecular_function GO:0055114; oxidation-reduction process; biological_process GO:0016705; oxidoreductase activity, acting on paired donors, with incorporation or reduction of molecular oxygen; molecular_function}	{NA}	{PF00067:Cytochrome P450}
i1_HQ_SD_c22184/f2p6/2000	BfCYP8388	{XP_017245569.1; PREDICTED: cytochrome P450 76A2-like [Daucus carota subsp. sativus]}	{sp|P37122|C76A2_SOLME; Cytochrome P450 76A2 OS=Solanum melongena OX=4111 GN=CYP76A2 PE=2 SV=1}	{rcu:8274891; K20618 CYP76A cytochrome P450 family 76 subfamily A - -}	{At3g52970; KOG0156 Cytochrome P450 CYP2 subfamily Q Secondary metabolites biosynthesis, transport and catabolism ;}	{GO:0020037; heme binding; molecular_function GO:0005506; iron ion binding; molecular_function GO:0055114; oxidation-reduction process; biological_process GO:0016705; oxidoreductase activity, acting on paired donors, with incorporation or reduction of molecular oxygen; molecular_function}	{XM_017389979.1; PREDICTED: Daucus carota subsp. sativus cytochrome P450 76A1-like (LOC108217130), mRNA}	{PF00067:Cytochrome P450}
i1_HQ_SD_c2223/f3p2/1832	BfCYP8393	{AFK79030.1; cytochrome P450 CYP736A53 [Bupleurum chinense]}	{sp|H2DH18|C7A12_PANGI; Cytochrome P450 CYP736A12 OS=Panax ginseng OX=4054 PE=2 SV=1}	{pxb:103938668; - - - - -}	{At4g36220; KOG0156 Cytochrome P450 CYP2 suBfCYPamily Q Secondary metabolites biosynthesis, transport and catabolism ;}	{GO:0020037; heme binding; molecular_function GO:0055114; oxidation-reduction process; biological_process GO:0005506; iron ion binding; molecular_function GO:0016705; oxidoreductase activity, acting on paired donors, with incorporation or reduction of molecular oxygen; molecular_function}	{JF803814.1; Bupleurum chinense cytochrome P450 CYP736A53 mRNA, complete cds}	{PF00067:Cytochrome P450}
i1_HQ_SD_c22310/f2p2/1850	BfCYP8404	{XP_017238332.1; PREDICTED: cytochrome P450 CYP71D312-like [Daucus carota subsp. sativus]}	{sp|H2DH20|C7D13_PANGI; Cytochrome P450 CYP71D313 OS=Panax ginseng OX=4054 PE=2 SV=1}	{jcu:105633070; - - - - -}	{At3g26210; KOG0156 Cytochrome P450 CYP2 suBfCYPamily Q Secondary metabolites biosynthesis, transport and catabolism ;}	{GO:0020037; heme binding; molecular_function GO:0016705; oxidoreductase activity, acting on paired donors, with incorporation or reduction of molecular oxygen; molecular_function GO:0055114; oxidation-reduction process; biological_process GO:0005506; iron ion binding; molecular_function}	{XM_017382843.1; PREDICTED: Daucus carota subsp. sativus cytochrome P450 CYP71D312-like (LOC108211282), mRNA}	{PF00067:Cytochrome P450}
i1_HQ_SD_c2246/f6p3/1769	BfCYP8423	{AFK79030.1; cytochrome P450 CYP736A53 [Bupleurum chinense]}	{sp|H2DH18|C7A12_PANGI; Cytochrome P450 CYP736A12 OS=Panax ginseng OX=4054 PE=2 SV=1}	{pxb:103938668; - - - - -}	{At5g07990; KOG0156 Cytochrome P450 CYP2 suBfCYPamily Q Secondary metabolites biosynthesis, transport and catabolism ;}	{GO:0020037; heme binding; molecular_function GO:0055114; oxidation-reduction process; biological_process GO:0005506; iron ion binding; molecular_function GO:0016705; oxidoreductase activity, acting on paired donors, with incorporation or reduction of molecular oxygen; molecular_function}	{JF803814.1; Bupleurum chinense cytochrome P450 CYP736A53 mRNA, complete cds}	{PF00067:Cytochrome P450}
i1_HQ_SD_c2370/f10p0/1840	BfCYP8539	{XP_017224895.1; PREDICTED: cytochrome P450 89A2-like [Daucus carota subsp. sativus]}	{sp|Q42602|C89A2_ARATH; Cytochrome P450 89A2 OS=Arabidopsis thaliana OX=3702 GN=CYP89A2 PE=2 SV=2}	{spen:107014567; - - - - -}	{At1g64950; KOG0156 Cytochrome P450 CYP2 subfamily Q Secondary metabolites biosynthesis, transport and catabolism ;}	{GO:0005506; iron ion binding; molecular_function GO:0055114; oxidation-reduction process; biological_process GO:0016705; oxidoreductase activity, acting on paired donors, with incorporation or reduction of molecular oxygen; molecular_function GO:0006355; regulation of transcription, DNA-dependent; biological_process GO:0020037; heme binding; molecular_function GO:0043401; steroid hormone mediate…	{XM_017369406.1; PREDICTED: Daucus carota subsp. sativus cytochrome P450 89A2-like (LOC108201098), mRNA}	{PF00104:Ligand-binding domain of nuclear hormone receptor PF00067:Cytochrome P450}
i1_HQ_SD_c25061/f3p0/1907	BfCYP8679	{XP_011101634.1; PREDICTED: cytochrome P450 87A3-like [Sesamum indicum]}	{sp|Q7XU38|C87A3_ORYSJ; Cytochrome P450 87A3 OS=Oryza sativa subsp. japonica OX=39947 GN=CYP87A3 PE=2 SV=3}	{pper:PRUPE_ppa024382mg; - - - - -}	{At1g12740; KOG0157 Cytochrome P450 CYP4/CYP19/CYP26 subfamilies QI Secondary metabolites biosynthesis, transport and catabolism ; Lipid transport and metabolism ;}	{GO:0007009; plasma membrane organization; biological_process GO:0020037; heme binding; molecular_function GO:0016705; oxidoreductase activity, acting on paired donors, with incorporation or reduction of molecular oxygen; molecular_function GO:0005506; iron ion binding; molecular_function GO:0055114; oxidation-reduction process; biological_process}	{XM_019372522.1; PREDICTED: Nicotiana attenuata cytochrome P450 87A3-like (LOC109209279), mRNA}	{PF00067:Cytochrome P450 PF08397:IRSp53/MIM homology domain}
i1_HQ_SD_c2607/f3p6/1824	BfCYP8771	{XP_017223623.1; PREDICTED: cytochrome P450 CYP736A12-like [Daucus carota subsp. sativus]}	{sp|H2DH18|C7A12_PANGI; Cytochrome P450 CYP736A12 OS=Panax ginseng OX=4054 PE=2 SV=1}	{pxb:103938668; - - - - -}	{At5g07990; KOG0156 Cytochrome P450 CYP2 suBfCYPamily Q Secondary metabolites biosynthesis, transport and catabolism ;}	{GO:0020037; heme binding; molecular_function GO:0055114; oxidation-reduction process; biological_process GO:0005506; iron ion binding; molecular_function GO:0016705; oxidoreductase activity, acting on paired donors, with incorporation or reduction of molecular oxygen; molecular_function}	{XM_017584775.1; PREDICTED: Vigna angularis cytochrome P450 CYP736A12-like (LOC108345920), mRNA}	{PF00067:Cytochrome P450}
i1_HQ_SD_c27486/f2p2/1873	BfCYP8874	{XP_017242067.1; PREDICTED: cytochrome P450 CYP72A219-like [Daucus carota subsp. sativus]}	{sp|H2DH21|C7A29_PANGI; Cytochrome P450 CYP72A219 OS=Panax ginseng OX=4054 PE=2 SV=1}	{fve:101297915; - - - - -}	{At3g14660; KOG0157 Cytochrome P450 CYP4/CYP19/CYP26 suBfCYPamilies QI Secondary metabolites biosynthesis, transport and catabolism ; Lipid transport and metabolism ;}	{GO:0005506; iron ion binding; molecular_function GO:0055114; oxidation-reduction process; biological_process GO:0016705; oxidoreductase activity, acting on paired donors, with incorporation or reduction of molecular oxygen; molecular_function GO:0020037; heme binding; molecular_function}	{XM_017386578.1; PREDICTED: Daucus carota subsp. sativus cytochrome P450 CYP72A219-like (LOC108214533), mRNA}	{PF00067:Cytochrome P450}
i1_HQ_SD_c28027/f4p9/1713	BfCYP8920	{XP_017215365.1; PREDICTED: cytochrome P450 CYP71D313-like [Daucus carota subsp. sativus]}	{sp|H2DH20|C7D13_PANGI; Cytochrome P450 CYP71D313 OS=Panax ginseng OX=4054 PE=2 SV=1}	{cann:107858875; - - - - -}	{At5g25130; KOG0156 Cytochrome P450 CYP2 suBfCYPamily Q Secondary metabolites biosynthesis, transport and catabolism ;}	{GO:0005506; iron ion binding; molecular_function GO:0055114; oxidation-reduction process; biological_process GO:0016705; oxidoreductase activity, acting on paired donors, with incorporation or reduction of molecular oxygen; molecular_function GO:0020037; heme binding; molecular_function}	{JF742645.1; Catharanthus roseus T16H-like protein mRNA, complete cds}	{PF00067:Cytochrome P450}
i1_HQ_SD_c31227/f4p0/1689	BfCYP9064	{ANO53926.1; p-coumaroyl shikimate/quinate 3'-hydroxylase 1 [Daucus carota subsp. carota]}	{sp|O22203|C98A3_ARATH; Cytochrome P450 98A3 OS=Arabidopsis thaliana OX=3702 GN=CYP98A3 PE=1 SV=1}	{nta:107767804; - - - - -}	{At2g40890; KOG0156 Cytochrome P450 CYP2 subfamily Q Secondary metabolites biosynthesis, transport and catabolism ;}	{GO:0020037; heme binding; molecular_function GO:0005506; iron ion binding; molecular_function GO:0055114; oxidation-reduction process; biological_process GO:0016705; oxidoreductase activity, acting on paired donors, with incorporation or reduction of molecular oxygen; molecular_function}	{XM_017402564.1; PREDICTED: Daucus carota subsp. sativus cytochrome P450 98A2 (LOC108227431), mRNA}	{PF00067:Cytochrome P450}
i1_HQ_SD_c3156/f2p1/1910	BfCYP9084	{XP_017244858.1; PREDICTED: cytochrome P450 CYP72A219-like [Daucus carota subsp. sativus]}	{sp|H2DH21|C7A29_PANGI; Cytochrome P450 CYP72A219 OS=Panax ginseng OX=4054 PE=2 SV=1}	{cam:101500476; - - - - -}	{At3g14690; KOG0157 Cytochrome P450 CYP4/CYP19/CYP26 suBfCYPamilies QI Secondary metabolites biosynthesis, transport and catabolism ; Lipid transport and metabolism ;}	{GO:0055114; oxidation-reduction process; biological_process GO:0005506; iron ion binding; molecular_function GO:0016705; oxidoreductase activity, acting on paired donors, with incorporation or reduction of molecular oxygen; molecular_function GO:0020037; heme binding; molecular_function}	{XM_017392680.1; PREDICTED: Daucus carota subsp. sativus cytochrome P450 CYP72A219-like (LOC108219313), mRNA}	{PF00067:Cytochrome P450}
i1_HQ_SD_c32432/f3p2/1840	BfCYP9133	{XP_017245468.1; PREDICTED: cytochrome P450 76A1-like [Daucus carota subsp. sativus]}	{sp|P37122|C76A2_SOLME; Cytochrome P450 76A2 OS=Solanum melongena OX=4111 GN=CYP76A2 PE=2 SV=1}	{rcu:8274891; K20618 CYP76A cytochrome P450 family 76 subfamily A - -}	{At3g52970; KOG0156 Cytochrome P450 CYP2 subfamily Q Secondary metabolites biosynthesis, transport and catabolism ;}	{GO:0020037; heme binding; molecular_function GO:0016705; oxidoreductase activity, acting on paired donors, with incorporation or reduction of molecular oxygen; molecular_function GO:0005506; iron ion binding; molecular_function GO:0055114; oxidation-reduction process; biological_process}	{XM_017388863.1; PREDICTED: Daucus carota subsp. sativus cytochrome P450 76A1-like (LOC108216173), mRNA}	{PF00067:Cytochrome P450}
i1_HQ_SD_c34517/f2p1/1717	BfCYP9308	{XP_017245569.1; PREDICTED: cytochrome P450 76A2-like [Daucus carota subsp. sativus]}	{sp|P37122|C76A2_SOLME; Cytochrome P450 76A2 OS=Solanum melongena OX=4111 GN=CYP76A2 PE=2 SV=1}	{rcu:8274891; K20618 CYP76A cytochrome P450 family 76 subfamily A - -}	{At3g52970; KOG0156 Cytochrome P450 CYP2 subfamily Q Secondary metabolites biosynthesis, transport and catabolism ;}	{GO:0020037; heme binding; molecular_function GO:0016705; oxidoreductase activity, acting on paired donors, with incorporation or reduction of molecular oxygen; molecular_function GO:0055114; oxidation-reduction process; biological_process GO:0005506; iron ion binding; molecular_function}	{XM_017389979.1; PREDICTED: Daucus carota subsp. sativus cytochrome P450 76A1-like (LOC108217130), mRNA}	{PF00067:Cytochrome P450}
i1_HQ_SD_c35289/f2p0/1674	BfCYP9336	{XP_017218715.1; PREDICTED: isoflavone 3'-hydroxylase-like isoform X2 [Daucus carota subsp. sativus]}	{sp|Q6WNQ8|C81E8_MEDTR; Cytochrome P450 81E8 OS=Medicago truncatula OX=3880 GN=CYP81E8 PE=2 SV=1}	{sind:105162117; - - - - -}	{At4g37330; KOG0156 Cytochrome P450 CYP2 subfamily Q Secondary metabolites biosynthesis, transport and catabolism ;}	{GO:0005506; iron ion binding; molecular_function GO:0055114; oxidation-reduction process; biological_process GO:0016705; oxidoreductase activity, acting on paired donors, with incorporation or reduction of molecular oxygen; molecular_function GO:0020037; heme binding; molecular_function}	{NA}	{PF00067:Cytochrome P450}
i1_HQ_SD_c3628/f2p2/1714	BfCYP9377	{XP_017253712.1; PREDICTED: cytochrome P450 71B26-like [Daucus carota subsp. sativus]}	{sp|Q9LVD2|C71BA_ARATH; Cytochrome P450 71B10 OS=Arabidopsis thaliana OX=3702 GN=CYP71B10 PE=3 SV=1}	{jcu:105635375; - - - - -}	{At5g57260; KOG0156 Cytochrome P450 CYP2 subfamily Q Secondary metabolites biosynthesis, transport and catabolism ;}	{GO:0016705; oxidoreductase activity, acting on paired donors, with incorporation or reduction of molecular oxygen; molecular_function GO:0005506; iron ion binding; molecular_function GO:0055114; oxidation-reduction process; biological_process GO:0020037; heme binding; molecular_function}	{XM_017398223.1; PREDICTED: Daucus carota subsp. sativus cytochrome P450 71B26-like (LOC108223801), mRNA}	{PF00067:Cytochrome P450}
i1_HQ_SD_c38341/f4p2/1987	BfCYP9464	{XP_017220461.1; PREDICTED: cytochrome P450 76A2-like [Daucus carota subsp. sativus]}	{sp|P37122|C76A2_SOLME; Cytochrome P450 76A2 OS=Solanum melongena OX=4111 GN=CYP76A2 PE=2 SV=1}	{nta:107770519; - - - - -}	{At3g52970; KOG0156 Cytochrome P450 CYP2 subfamily Q Secondary metabolites biosynthesis, transport and catabolism ;}	{GO:0016705; oxidoreductase activity, acting on paired donors, with incorporation or reduction of molecular oxygen; molecular_function GO:0005506; iron ion binding; molecular_function GO:0055114; oxidation-reduction process; biological_process GO:0020037; heme binding; molecular_function}	{XM_017366269.1; PREDICTED: Daucus carota subsp. sativus cytochrome P450 76A1-like (LOC108198515), mRNA}	{PF00067:Cytochrome P450}
i1_HQ_SD_c38401/f2p0/1818	BfCYP9471	{XP_017242067.1; PREDICTED: cytochrome P450 CYP72A219-like [Daucus carota subsp. sativus]}	{sp|H2DH21|C7A29_PANGI; Cytochrome P450 CYP72A219 OS=Panax ginseng OX=4054 PE=2 SV=1}	{sot:102595622; - - - - -}	{At3g14610; KOG0157 Cytochrome P450 CYP4/CYP19/CYP26 suBfCYPamilies QI Secondary metabolites biosynthesis, transport and catabolism ; Lipid transport and metabolism ;}	{GO:0005506; iron ion binding; molecular_function GO:0055114; oxidation-reduction process; biological_process GO:0016705; oxidoreductase activity, acting on paired donors, with incorporation or reduction of molecular oxygen; molecular_function GO:0020037; heme binding; molecular_function}	{XM_017386578.1; PREDICTED: Daucus carota subsp. sativus cytochrome P450 CYP72A219-like (LOC108214533), mRNA}	{PF00067:Cytochrome P450}
i1_HQ_SD_c38660/f2p3/1751	BfCYP9486	{XP_017229160.1; PREDICTED: cytochrome P450 71B34-like [Daucus carota subsp. sativus]}	{sp|Q9LIP5|C71BW_ARATH; Cytochrome P450 71B35 OS=Arabidopsis thaliana OX=3702 GN=CYP71B35 PE=2 SV=1}	{vvi:100245779; - - - - -}	{At3g26310; KOG0156 Cytochrome P450 CYP2 subfamily Q Secondary metabolites biosynthesis, transport and catabolism ;}	{GO:0020037; heme binding; molecular_function GO:0016705; oxidoreductase activity, acting on paired donors, with incorporation or reduction of molecular oxygen; molecular_function GO:0005506; iron ion binding; molecular_function GO:0055114; oxidation-reduction process; biological_process}	{XM_017373673.1; PREDICTED: Daucus carota subsp. sativus cytochrome P450 71B34-like (LOC108204304), transcript variant X2, mRNA}	{PF00067:Cytochrome P450}
i1_HQ_SD_c42026/f2p0/1974	BfCYP9611	{XP_017255040.1; PREDICTED: cytochrome P450 71B9-like [Daucus carota subsp. sativus]}	{sp|O65782|C83B1_ARATH; Cytochrome P450 83B1 OS=Arabidopsis thaliana OX=3702 GN=CYP83B1 PE=1 SV=1}	{sind:105161642; - - - - -}	{At4g31500; KOG0156 Cytochrome P450 CYP2 subfamily Q Secondary metabolites biosynthesis, transport and catabolism ;}	{GO:0020037; heme binding; molecular_function GO:0042742; defense response to bacterium; biological_process GO:0055114; oxidation-reduction process; biological_process GO:0005506; iron ion binding; molecular_function GO:0016705; oxidoreductase activity, acting on paired donors, with incorporation or reduction of molecular oxygen; molecular_function GO:0005576; NA}	{XM_017399551.1; PREDICTED: Daucus carota subsp. sativus cytochrome P450 71B9-like (LOC108224820), mRNA}	{PF00067:Cytochrome P450 PF05298:Bombinin}
i1_HQ_SD_c42210/f2p0/1816	BfCYP9622	{XP_017253444.1; PREDICTED: cytochrome P450 77A1-like [Daucus carota subsp. sativus]}	{sp|P37123|C77A1_SOLME; Cytochrome P450 77A1 (Fragment) OS=Solanum melongena OX=4111 GN=CYP77A1 PE=2 SV=1}	{vvi:100245465; - - - - -}	{At5g04660; KOG0156 Cytochrome P450 CYP2 subfamily Q Secondary metabolites biosynthesis, transport and catabolism ;}	{GO:0070588; calcium ion transmembrane transport; biological_process GO:0055114; oxidation-reduction process; biological_process GO:0005506; iron ion binding; molecular_function GO:0016705; oxidoreductase activity, acting on paired donors, with incorporation or reduction of molecular oxygen; molecular_function GO:0005262; calcium channel activity; molecular_function GO:0020037; heme binding; mole…	{XM_006407477.1; Eutrema salsugineum hypothetical protein (EUTSA_v10022031mg) mRNA, complete cds}	{PF00067:Cytochrome P450 PF01365:RIH domain}
i1_HQ_SD_c43174/f7p3/1727	BfCYP9665	{XP_017253444.1; PREDICTED: cytochrome P450 77A1-like [Daucus carota subsp. sativus]}	{sp|Q9LZ31|C77A4_ARATH; Cytochrome P450 77A4 OS=Arabidopsis thaliana OX=3702 GN=CYP77A4 PE=2 SV=1}	{vvi:100245465; - - - - -}	{At5g04660; KOG0156 Cytochrome P450 CYP2 subfamily Q Secondary metabolites biosynthesis, transport and catabolism ;}	{GO:0016705; oxidoreductase activity, acting on paired donors, with incorporation or reduction of molecular oxygen; molecular_function GO:0055114; oxidation-reduction process; biological_process GO:0005506; iron ion binding; molecular_function GO:0070588; calcium ion transmembrane transport; biological_process GO:0016020; membrane; cellular_component GO:0020037; heme binding; molecular_function G…	{XM_006407477.1; Eutrema salsugineum hypothetical protein (EUTSA_v10022031mg) mRNA, complete cds}	{PF00067:Cytochrome P450 PF01365:RIH domain}
i1_HQ_SD_c4354/f2p0/1699	BfCYP9732	{XP_017257695.1; PREDICTED: cytochrome P450 89A2-like [Daucus carota subsp. sativus]}	{sp|Q42602|C89A2_ARATH; Cytochrome P450 89A2 OS=Arabidopsis thaliana OX=3702 GN=CYP89A2 PE=2 SV=2}	{sot:102578421; - - - - -}	{At1g64950; KOG0156 Cytochrome P450 CYP2 subfamily Q Secondary metabolites biosynthesis, transport and catabolism ;}	{GO:0055114; oxidation-reduction process; biological_process GO:0005506; iron ion binding; molecular_function GO:0016705; oxidoreductase activity, acting on paired donors, with incorporation or reduction of molecular oxygen; molecular_function GO:0008250; oligosaccharyltransferase complex; cellular_component GO:0006487; protein N-linked glycosylation; biological_process GO:0020037; heme binding; …	{XM_017402206.1; PREDICTED: Daucus carota subsp. sativus cytochrome P450 89A2-like (LOC108227180), mRNA}	{PF05817:Oligosaccharyltransferase subunit Ribophorin II PF00067:Cytochrome P450}
i1_HQ_SD_c448/f17p0/1975	BfCYP9751	{XP_017248752.1; PREDICTED: cytochrome P450 71A1-like [Daucus carota subsp. sativus]}	{sp|P24465|C71A1_PERAE; Cytochrome P450 71A1 OS=Persea americana OX=3435 GN=CYP71A1 PE=1 SV=2}	{spen:107012542; K20623 CYP92A6 typhasterol/6-deoxotyphasterol 2alpha-hydroxylase - -; spen:107012542; - - - - -}	{At5g07990; KOG0156 Cytochrome P450 CYP2 subfamily Q Secondary metabolites biosynthesis, transport and catabolism ;}	{GO:0020037; heme binding; molecular_function GO:0055114; oxidation-reduction process; biological_process GO:0005506; iron ion binding; molecular_function GO:0016705; oxidoreductase activity, acting on paired donors, with incorporation or reduction of molecular oxygen; molecular_function}	{XM_017393263.1; PREDICTED: Daucus carota subsp. sativus cytochrome P450 71A1-like (LOC108219757), mRNA}	{PF00067:Cytochrome P450}
i1_HQ_SD_c45949/f17p3/1757	BfCYP9787	{XP_017245569.1; PREDICTED: cytochrome P450 76A2-like [Daucus carota subsp. sativus]}	{sp|P37122|C76A2_SOLME; Cytochrome P450 76A2 OS=Solanum melongena OX=4111 GN=CYP76A2 PE=2 SV=1}	{rcu:8274891; K20618 CYP76A cytochrome P450 family 76 subfamily A - -}	{At3g52970; KOG0156 Cytochrome P450 CYP2 subfamily Q Secondary metabolites biosynthesis, transport and catabolism ;}	{GO:0020037; heme binding; molecular_function GO:0016705; oxidoreductase activity, acting on paired donors, with incorporation or reduction of molecular oxygen; molecular_function GO:0005506; iron ion binding; molecular_function GO:0055114; oxidation-reduction process; biological_process}	{NA}	{PF00067:Cytochrome P450}
i1_HQ_SD_c46046/f15p0/1845	BfCYP9809	{BAK03594.1; predicted protein [Hordeum vulgare subsp. vulgare]}	{sp|Q5KTN2|ALT2_ALTSO; Cytochrome P450 monooxygenase alt2 OS=Alternaria solani OX=48100 GN=alt2 PE=3 SV=1}	{sot:102599484; - - - - -}	{At5g08250; KOG0157 Cytochrome P450 CYP4/CYP19/CYP26 subfamilies QI Secondary metabolites biosynthesis, transport and catabolism ; Lipid transport and metabolism ;}	{GO:0020037; heme binding; molecular_function GO:0055114; oxidation-reduction process; biological_process GO:0005506; iron ion binding; molecular_function GO:0016705; oxidoreductase activity, acting on paired donors, with incorporation or reduction of molecular oxygen; molecular_function}	{NA}	{PF00067:Cytochrome P450}
i1_HQ_SD_c46161/f5p1/1819	BfCYP9831	{XP_017233252.1; PREDICTED: cytochrome P450 CYP749A22-like [Daucus carota subsp. sativus]}	{sp|H2DH17|C7A22_PANGI; Cytochrome P450 CYP749A22 OS=Panax ginseng OX=4054 PE=2 SV=1}	{sind:105156471; - - - - -}	{At2g26710; KOG0157 Cytochrome P450 CYP4/CYP19/CYP26 suBfCYPamilies QI Secondary metabolites biosynthesis, transport and catabolism ; Lipid transport and metabolism ;}	{GO:0016705; oxidoreductase activity, acting on paired donors, with incorporation or reduction of molecular oxygen; molecular_function GO:0005506; iron ion binding; molecular_function GO:0055114; oxidation-reduction process; biological_process GO:0020037; heme binding; molecular_function}	{XM_011071212.1; PREDICTED: Sesamum indicum cytochrome P450 CYP749A22-like (LOC105155342), partial mRNA}	{PF00067:Cytochrome P450}
i1_HQ_SD_c46254/f26p2/1749	BfCYP9842	{XP_017251889.1; PREDICTED: cytochrome P450 CYP72A219-like [Daucus carota subsp. sativus]}	{sp|H2DH21|C7A29_PANGI; Cytochrome P450 CYP72A219 OS=Panax ginseng OX=4054 PE=2 SV=1}	{cam:101500476; - - - - -}	{At3g14680; KOG0157 Cytochrome P450 CYP4/CYP19/CYP26 suBfCYPamilies QI Secondary metabolites biosynthesis, transport and catabolism ; Lipid transport and metabolism ;}	{GO:0020037; heme binding; molecular_function GO:0005506; iron ion binding; molecular_function GO:0055114; oxidation-reduction process; biological_process GO:0016705; oxidoreductase activity, acting on paired donors, with incorporation or reduction of molecular oxygen; molecular_function}	{XM_017396400.1; PREDICTED: Daucus carota subsp. sativus cytochrome P450 CYP72A219-like (LOC108222478), mRNA}	{PF00067:Cytochrome P450}
i1_HQ_SD_c46327/f5p0/1802	BfCYP9853	{XP_011101634.1; PREDICTED: cytochrome P450 87A3-like [Sesamum indicum]}	{sp|Q7XU38|C87A3_ORYSJ; Cytochrome P450 87A3 OS=Oryza sativa subsp. japonica OX=39947 GN=CYP87A3 PE=2 SV=3}	{pper:PRUPE_ppa016466mg; - - - - -}	{At1g12740; KOG0157 Cytochrome P450 CYP4/CYP19/CYP26 subfamilies QI Secondary metabolites biosynthesis, transport and catabolism ; Lipid transport and metabolism ;}	{GO:0055114; oxidation-reduction process; biological_process GO:0005506; iron ion binding; molecular_function GO:0016705; oxidoreductase activity, acting on paired donors, with incorporation or reduction of molecular oxygen; molecular_function GO:0020037; heme binding; molecular_function GO:0007009; plasma membrane organization; biological_process}	{NA}	{PF08397:IRSp53/MIM homology domain PF00067:Cytochrome P450}
i1_HQ_SD_c4681/f3p49/1673	BfCYP9907	{XP_017223623.1; PREDICTED: cytochrome P450 CYP736A12-like [Daucus carota subsp. sativus]}	{sp|H2DH18|C7A12_PANGI; Cytochrome P450 CYP736A12 OS=Panax ginseng OX=4054 PE=2 SV=1}	{pxb:103938668; - - - - -}	{At5g07990; KOG0156 Cytochrome P450 CYP2 suBfCYPamily Q Secondary metabolites biosynthesis, transport and catabolism ;}	{GO:0016705; oxidoreductase activity, acting on paired donors, with incorporation or reduction of molecular oxygen; molecular_function GO:0005506; iron ion binding; molecular_function GO:0055114; oxidation-reduction process; biological_process GO:0020037; heme binding; molecular_function}	{XM_017368134.1; PREDICTED: Daucus carota subsp. sativus cytochrome P450 CYP736A12-like (LOC108200074), mRNA}	{PF00067:Cytochrome P450}
i1_HQ_SD_c4701/f2p0/1910	BfCYP9916	{KZM88146.1; hypothetical protein DCAR_025221 [Daucus carota subsp. sativus]}	{sp|Q7XU38|C87A3_ORYSJ; Cytochrome P450 87A3 OS=Oryza sativa subsp. japonica OX=39947 GN=CYP87A3 PE=2 SV=3}	{pop:POPTR_0003s12250g; - - - - -}	{At1g12740; KOG0157 Cytochrome P450 CYP4/CYP19/CYP26 subfamilies QI Secondary metabolites biosynthesis, transport and catabolism ; Lipid transport and metabolism ;}	{GO:0016705; oxidoreductase activity, acting on paired donors, with incorporation or reduction of molecular oxygen; molecular_function GO:0005506; iron ion binding; molecular_function GO:0055114; oxidation-reduction process; biological_process GO:0020037; heme binding; molecular_function}	{XM_017361834.1; PREDICTED: Daucus carota subsp. sativus cytochrome P450 87A3-like (LOC108194895), mRNA}	{PF00067:Cytochrome P450}
i1_HQ_SD_c48434/f2p2/1748	BfCYP10028	{XP_017229161.1; PREDICTED: cytochrome P450 71B34-like [Daucus carota subsp. sativus]}	{sp|Q9LIP6|C71BV_ARATH; Cytochrome P450 71B34 OS=Arabidopsis thaliana OX=3702 GN=CYP71B34 PE=2 SV=1}	{vvi:100245779; - - - - -}	{At3g26300; KOG0156 Cytochrome P450 CYP2 subfamily Q Secondary metabolites biosynthesis, transport and catabolism ;}	{GO:0020037; heme binding; molecular_function GO:0016705; oxidoreductase activity, acting on paired donors, with incorporation or reduction of molecular oxygen; molecular_function GO:0005506; iron ion binding; molecular_function GO:0055114; oxidation-reduction process; biological_process}	{XM_017373673.1; PREDICTED: Daucus carota subsp. sativus cytochrome P450 71B34-like (LOC108204304), transcript variant X2, mRNA}	{PF00067:Cytochrome P450}
i1_HQ_SD_c48484/f2p0/1800	BfCYP10044	{XP_017244858.1; PREDICTED: cytochrome P450 CYP72A219-like [Daucus carota subsp. sativus]}	{sp|H2DH21|C7A29_PANGI; Cytochrome P450 CYP72A219 OS=Panax ginseng OX=4054 PE=2 SV=1}	{cam:101500476; - - - - -}	{At3g14690; KOG0157 Cytochrome P450 CYP4/CYP19/CYP26 suBfCYPamilies QI Secondary metabolites biosynthesis, transport and catabolism ; Lipid transport and metabolism ;}	{GO:0020037; heme binding; molecular_function GO:0005506; iron ion binding; molecular_function GO:0055114; oxidation-reduction process; biological_process GO:0016705; oxidoreductase activity, acting on paired donors, with incorporation or reduction of molecular oxygen; molecular_function}	{XM_017392680.1; PREDICTED: Daucus carota subsp. sativus cytochrome P450 CYP72A219-like (LOC108219313), mRNA}	{PF00067:Cytochrome P450}
i1_HQ_SD_c5497/f2p4/1684	BfCYP10180	{CDP07542.1; unnamed protein product [Coffea canephora]}	{sp|O48786|C734A_ARATH; Cytochrome P450 734A1 OS=Arabidopsis thaliana OX=3702 GN=CYP734A1 PE=2 SV=1}	{nta:107776055; - - - - -}	{At1g75130; KOG0157 Cytochrome P450 CYP4/CYP19/CYP26 subfamilies QI Secondary metabolites biosynthesis, transport and catabolism ; Lipid transport and metabolism ;}	{GO:0016705; oxidoreductase activity, acting on paired donors, with incorporation or reduction of molecular oxygen; molecular_function GO:0055114; oxidation-reduction process; biological_process GO:0005506; iron ion binding; molecular_function GO:0020037; heme binding; molecular_function}	{XM_006382548.1; Populus trichocarpa hypothetical protein (POPTR_0005s03740g) mRNA, complete cds}	{PF00067:Cytochrome P450}
i1_HQ_SD_c5685/f2p3/1723	BfCYP10213	{XP_017246213.1; PREDICTED: cytochrome P450 81E8-like [Daucus carota subsp. sativus]}	{sp|Q9FG65|C81D1_ARATH; Cytochrome P450 81D1 OS=Arabidopsis thaliana OX=3702 GN=CYP81D1 PE=2 SV=1}	{jcu:105630888; - - - - -}	{At4g37360; KOG0156 Cytochrome P450 CYP2 subfamily Q Secondary metabolites biosynthesis, transport and catabolism ;}	{GO:0055114; oxidation-reduction process; biological_process GO:0005506; iron ion binding; molecular_function GO:0016705; oxidoreductase activity, acting on paired donors, with incorporation or reduction of molecular oxygen; molecular_function GO:0020037; heme binding; molecular_function}	{XM_012212876.1; PREDICTED: Jatropha curcas isoflavone 2'-hydroxylase-like (LOC105630888), mRNA}	{PF00067:Cytochrome P450}
i1_HQ_SD_c6197/f2p0/1959	BfCYP10421	{XP_017233252.1; PREDICTED: cytochrome P450 CYP749A22-like [Daucus carota subsp. sativus]}	{sp|H2DH17|C7A22_PANGI; Cytochrome P450 CYP749A22 OS=Panax ginseng OX=4054 PE=2 SV=1}	{jcu:105630582; K15639 CYP734A1, BAS1 PHYB activation tagged suppressor 1 1.14.-.- ko00905; Metabolism; Metabolism of terpenoids and polyketides; Brassinosteroid biosynthesis}	{At2g26710; KOG0157 Cytochrome P450 CYP4/CYP19/CYP26 suBfCYPamilies QI Secondary metabolites biosynthesis, transport and catabolism ; Lipid transport and metabolism ;}	{GO:0020037; heme binding; molecular_function GO:0016705; oxidoreductase activity, acting on paired donors, with incorporation or reduction of molecular oxygen; molecular_function GO:0005506; iron ion binding; molecular_function GO:0055114; oxidation-reduction process; biological_process}	{NA}	{PF00067:Cytochrome P450}
i1_HQ_SD_c62550/f4p9/1775	BfCYP10444	{XP_017253444.1; PREDICTED: cytochrome P450 77A1-like [Daucus carota subsp. sativus]}	{sp|O48928|C77A3_SOYBN; Cytochrome P450 77A3 OS=Glycine max OX=3847 GN=CYP77A3 PE=2 SV=1}	{vvi:100245465; - - - - -}	{At5g04660; KOG0156 Cytochrome P450 CYP2 subfamily Q Secondary metabolites biosynthesis, transport and catabolism ;}	{GO:0070588; calcium ion transmembrane transport; biological_process GO:0005506; iron ion binding; molecular_function GO:0055114; oxidation-reduction process; biological_process GO:0070072; vacuolar proton-transporting V-type ATPase complex assembly; biological_process GO:0020037; heme binding; molecular_function GO:0016020; membrane; cellular_component GO:0016705; oxidoreductase activity, acting…	{XM_006407477.1; Eutrema salsugineum hypothetical protein (EUTSA_v10022031mg) mRNA, complete cds}	{PF00067:Cytochrome P450 PF08636:ER protein Pkr1 PF01365:RIH domain}
i1_HQ_SD_c6418/f2p0/1829	BfCYP10684	{XP_017254113.1; PREDICTED: cytochrome P450 84A1-like [Daucus carota subsp. sativus]}	{sp|Q42600|C84A1_ARATH; Cytochrome P450 84A1 OS=Arabidopsis thaliana OX=3702 GN=CYP84A1 PE=1 SV=1}	{cann:107859914; - - - - -}	{At4g36220; KOG0156 Cytochrome P450 CYP2 subfamily Q Secondary metabolites biosynthesis, transport and catabolism ;}	{GO:0055114; oxidation-reduction process; biological_process GO:0005506; iron ion binding; molecular_function GO:0016705; oxidoreductase activity, acting on paired donors, with incorporation or reduction of molecular oxygen; molecular_function GO:0020037; heme binding; molecular_function}	{KX022116.1; Daucus carota subsp. carota ferulate 5-hydroxylase mRNA, partial cds}	{PF00067:Cytochrome P450}
i1_HQ_SD_c64284/f3p1/1913	BfCYP10688	{XP_017253202.1; PREDICTED: cytochrome P450 CYP72A219-like [Daucus carota subsp. sativus]}	{sp|H2DH21|C7A29_PANGI; Cytochrome P450 CYP72A219 OS=Panax ginseng OX=4054 PE=2 SV=1}	{cam:101500476; - - - - -}	{At3g14690; KOG0157 Cytochrome P450 CYP4/CYP19/CYP26 suBfCYPamilies QI Secondary metabolites biosynthesis, transport and catabolism ; Lipid transport and metabolism ;}	{GO:0020037; heme binding; molecular_function GO:0016705; oxidoreductase activity, acting on paired donors, with incorporation or reduction of molecular oxygen; molecular_function GO:0005506; iron ion binding; molecular_function GO:0055114; oxidation-reduction process; biological_process}	{XM_017397713.1; PREDICTED: Daucus carota subsp. sativus cytochrome P450 CYP72A219-like (LOC108223441), mRNA}	{PF00067:Cytochrome P450}
i1_HQ_SD_c64773/f2p2/1776	BfCYP10711	{XP_017255162.1; PREDICTED: cytochrome P450 CYP736A12-like [Daucus carota subsp. sativus]}	{sp|H2DH18|C7A12_PANGI; Cytochrome P450 CYP736A12 OS=Panax ginseng OX=4054 PE=2 SV=1}	{pxb:103938668; - - - - -}	{At3g26310; KOG0156 Cytochrome P450 CYP2 suBfCYPamily Q Secondary metabolites biosynthesis, transport and catabolism ;}	{GO:0020037; heme binding; molecular_function GO:0016705; oxidoreductase activity, acting on paired donors, with incorporation or reduction of molecular oxygen; molecular_function GO:0055114; oxidation-reduction process; biological_process GO:0005506; iron ion binding; molecular_function}	{NA}	{PF00067:Cytochrome P450}
i1_HQ_SD_c6646/f2p2/1667	BfCYP10745	{XP_017258861.1; PREDICTED: cytochrome P450 CYP736A12-like [Daucus carota subsp. sativus]}	{sp|H2DH18|C7A12_PANGI; Cytochrome P450 CYP736A12 OS=Panax ginseng OX=4054 PE=2 SV=1}	{pxb:103938668; - - - - -}	{At3g26310; KOG0156 Cytochrome P450 CYP2 suBfCYPamily Q Secondary metabolites biosynthesis, transport and catabolism ;}	{GO:0016705; oxidoreductase activity, acting on paired donors, with incorporation or reduction of molecular oxygen; molecular_function GO:0005506; iron ion binding; molecular_function GO:0055114; oxidation-reduction process; biological_process GO:0020037; heme binding; molecular_function}	{XM_016027519.1; PREDICTED: Ziziphus jujuba cytochrome P450 CYP736A12-like (LOC107418833), mRNA}	{PF00067:Cytochrome P450}
i1_HQ_SD_c69238/f18p0/1884	BfCYP10861	{XP_017238332.1; PREDICTED: cytochrome P450 CYP71D312-like [Daucus carota subsp. sativus]}	{sp|H2DH20|C7D13_PANGI; Cytochrome P450 CYP71D313 OS=Panax ginseng OX=4054 PE=2 SV=1}	{sly:101247777; K07418 CYP2J cytochrome P450 family 2 suBfCYPamily J 1.14.14.1 ko00590; Metabolism; Lipid metabolism; Arachidonic acid metabolism | ko00591; Metabolism; Lipid metabolism; Linoleic acid metabolism | ko04913; Organismal Systems; Endocrine system; Ovarian steroidogenesis | ko04726; Organismal Systems; Nervous system; Serotonergic synapse | ko04750; Organismal Systems; Sensory system;…	{At3g26210; KOG0156 Cytochrome P450 CYP2 suBfCYPamily Q Secondary metabolites biosynthesis, transport and catabolism ;}	{GO:0020037; heme binding; molecular_function GO:0055114; oxidation-reduction process; biological_process GO:0005506; iron ion binding; molecular_function GO:0016705; oxidoreductase activity, acting on paired donors, with incorporation or reduction of molecular oxygen; molecular_function}	{XM_017382843.1; PREDICTED: Daucus carota subsp. sativus cytochrome P450 CYP71D312-like (LOC108211282), mRNA}	{PF00067:Cytochrome P450}
i1_HQ_SD_c693/f6p0/1855	BfCYP10870	{XP_017248204.1; PREDICTED: cytochrome P450 CYP72A219-like [Daucus carota subsp. sativus]}	{sp|H2DH21|C7A29_PANGI; Cytochrome P450 CYP72A219 OS=Panax ginseng OX=4054 PE=2 SV=1}	{nta:107781087; - - - - -}	{At3g14690; KOG0157 Cytochrome P450 CYP4/CYP19/CYP26 suBfCYPamilies QI Secondary metabolites biosynthesis, transport and catabolism ; Lipid transport and metabolism ;}	{GO:0020037; heme binding; molecular_function GO:0016705; oxidoreductase activity, acting on paired donors, with incorporation or reduction of molecular oxygen; molecular_function GO:0055114; oxidation-reduction process; biological_process GO:0005506; iron ion binding; molecular_function}	{XM_017392715.1; PREDICTED: Daucus carota subsp. sativus cytochrome P450 CYP72A219-like (LOC108219329), mRNA}	{PF00067:Cytochrome P450}
i1_HQ_SD_c69329/f10p2/1787	BfCYP10882	{XP_017238332.1; PREDICTED: cytochrome P450 CYP71D312-like [Daucus carota subsp. sativus]}	{sp|H2DH20|C7D13_PANGI; Cytochrome P450 CYP71D313 OS=Panax ginseng OX=4054 PE=2 SV=1}	{jcu:105633070; - - - - -}	{At3g26300; KOG0156 Cytochrome P450 CYP2 suBfCYPamily Q Secondary metabolites biosynthesis, transport and catabolism ;}	{GO:0016705; oxidoreductase activity, acting on paired donors, with incorporation or reduction of molecular oxygen; molecular_function GO:0003785; actin monomer binding; molecular_function GO:0055114; oxidation-reduction process; biological_process GO:0005506; iron ion binding; molecular_function GO:0007015; actin filament organization; biological_process GO:0020037; heme binding; molecular_funct…	{XM_017382843.1; PREDICTED: Daucus carota subsp. sativus cytochrome P450 CYP71D312-like (LOC108211282), mRNA}	{PF00067:Cytochrome P450 PF01290:Thymosin beta-4 family}
i1_HQ_SD_c69457/f11p2/1820	BfCYP10924	{XP_017242067.1; PREDICTED: cytochrome P450 CYP72A219-like [Daucus carota subsp. sativus]}	{sp|H2DH21|C7A29_PANGI; Cytochrome P450 CYP72A219 OS=Panax ginseng OX=4054 PE=2 SV=1}	{fve:101297915; - - - - -}	{At3g14610; KOG0157 Cytochrome P450 CYP4/CYP19/CYP26 suBfCYPamilies QI Secondary metabolites biosynthesis, transport and catabolism ; Lipid transport and metabolism ;}	{GO:0020037; heme binding; molecular_function GO:0003676; nucleic acid binding; molecular_function GO:0016705; oxidoreductase activity, acting on paired donors, with incorporation or reduction of molecular oxygen; molecular_function GO:0005506; iron ion binding; molecular_function GO:0055114; oxidation-reduction process; biological_process}	{XM_017386578.1; PREDICTED: Daucus carota subsp. sativus cytochrome P450 CYP72A219-like (LOC108214533), mRNA}	{PF00067:Cytochrome P450 PF16251:Nucleic acid-binding domain (NAR)}
i1_HQ_SD_c69666/f2p4/1740	BfCYP10976	{XP_017243980.1; PREDICTED: cytochrome P450 704C1-like [Daucus carota subsp. sativus]}	{sp|Q50EK3|C04C1_PINTA; Cytochrome P450 704C1 OS=Pinus taeda OX=3352 GN=CYP704C1 PE=2 SV=1}	{cic:CICLE_v10004720mg; - - - - -}	{At2g45510; KOG0157 Cytochrome P450 CYP4/CYP19/CYP26 subfamilies QI Secondary metabolites biosynthesis, transport and catabolism ; Lipid transport and metabolism ;}	{GO:0020037; heme binding; molecular_function GO:0055114; oxidation-reduction process; biological_process GO:0005506; iron ion binding; molecular_function GO:0016705; oxidoreductase activity, acting on paired donors, with incorporation or reduction of molecular oxygen; molecular_function}	{XM_017388491.1; PREDICTED: Daucus carota subsp. sativus cytochrome P450 704C1-like (LOC108215882), mRNA}	{PF00067:Cytochrome P450}
i1_HQ_SD_c69685/f2p1/1750	BfCYP10981	{KZM86972.1; hypothetical protein DCAR_024106 [Daucus carota subsp. sativus]}	{sp|Q9FMY1|C86B1_ARATH; Cytochrome P450 86B1 OS=Arabidopsis thaliana OX=3702 GN=CYP86B1 PE=2 SV=1}	{vvi:100250807; - - - - -}	{At1g24540; KOG0157 Cytochrome P450 CYP4/CYP19/CYP26 subfamilies QI Secondary metabolites biosynthesis, transport and catabolism ; Lipid transport and metabolism ;}	{GO:0016705; oxidoreductase activity, acting on paired donors, with incorporation or reduction of molecular oxygen; molecular_function GO:0005506; iron ion binding; molecular_function GO:0055114; oxidation-reduction process; biological_process GO:0020037; heme binding; molecular_function}	{XM_017361209.1; PREDICTED: Daucus carota subsp. sativus cytochrome P450 86B1-like (LOC108194260), mRNA}	{PF00067:Cytochrome P450}
i1_HQ_SD_c69714/f17p7/1882	BfCYP10993	{XP_017221758.1; PREDICTED: cytochrome P450 76A1-like [Daucus carota subsp. sativus]}	{sp|P37122|C76A2_SOLME; Cytochrome P450 76A2 OS=Solanum melongena OX=4111 GN=CYP76A2 PE=2 SV=1}	{nta:107770519; - - - - -}	{At3g52970; KOG0156 Cytochrome P450 CYP2 subfamily Q Secondary metabolites biosynthesis, transport and catabolism ;}	{GO:0020037; heme binding; molecular_function GO:0016705; oxidoreductase activity, acting on paired donors, with incorporation or reduction of molecular oxygen; molecular_function GO:0055114; oxidation-reduction process; biological_process GO:0005506; iron ion binding; molecular_function}	{XM_017364973.1; PREDICTED: Daucus carota subsp. sativus cytochrome P450 76A2-like (LOC108197375), transcript variant X2, mRNA}	{PF00067:Cytochrome P450}
i1_HQ_SD_c70222/f28p1/1767	BfCYP11103	{XP_017242067.1; PREDICTED: cytochrome P450 CYP72A219-like [Daucus carota subsp. sativus]}	{sp|H2DH21|C7A29_PANGI; Cytochrome P450 CYP72A219 OS=Panax ginseng OX=4054 PE=2 SV=1}	{fve:101297915; - - - - -}	{At3g14610; KOG0157 Cytochrome P450 CYP4/CYP19/CYP26 suBfCYPamilies QI Secondary metabolites biosynthesis, transport and catabolism ; Lipid transport and metabolism ;}	{GO:0020037; heme binding; molecular_function GO:0003676; nucleic acid binding; molecular_function GO:0016705; oxidoreductase activity, acting on paired donors, with incorporation or reduction of molecular oxygen; molecular_function GO:0055114; oxidation-reduction process; biological_process GO:0005506; iron ion binding; molecular_function}	{XM_017386578.1; PREDICTED: Daucus carota subsp. sativus cytochrome P450 CYP72A219-like (LOC108214533), mRNA}	{PF00067:Cytochrome P450 PF16251:Nucleic acid-binding domain (NAR)}
i1_HQ_SD_c7770/f4p1/1903	BfCYP11226	{XP_017245569.1; PREDICTED: cytochrome P450 76A2-like [Daucus carota subsp. sativus]}	{sp|P37122|C76A2_SOLME; Cytochrome P450 76A2 OS=Solanum melongena OX=4111 GN=CYP76A2 PE=2 SV=1}	{rcu:8274891; K20618 CYP76A cytochrome P450 family 76 subfamily A - -}	{At3g52970; KOG0156 Cytochrome P450 CYP2 subfamily Q Secondary metabolites biosynthesis, transport and catabolism ;}	{GO:0005506; iron ion binding; molecular_function GO:0055114; oxidation-reduction process; biological_process GO:0016705; oxidoreductase activity, acting on paired donors, with incorporation or reduction of molecular oxygen; molecular_function GO:0020037; heme binding; molecular_function}	{XM_017389979.1; PREDICTED: Daucus carota subsp. sativus cytochrome P450 76A1-like (LOC108217130), mRNA}	{PF00067:Cytochrome P450}
i1_HQ_SD_c7821/f4p11/1939	BfCYP11233	{XP_017256107.1; PREDICTED: cytochrome P450 94A2-like [Daucus carota subsp. sativus]}	{sp|P98188|C94A2_VICSA; Cytochrome P450 94A2 OS=Vicia sativa OX=3908 GN=CYP94A2 PE=2 SV=1}	{nta:107767536; - - - - -}	{At5g63450; KOG0157 Cytochrome P450 CYP4/CYP19/CYP26 subfamilies QI Secondary metabolites biosynthesis, transport and catabolism ; Lipid transport and metabolism ;}	{GO:0055114; oxidation-reduction process; biological_process GO:0005506; iron ion binding; molecular_function GO:0016705; oxidoreductase activity, acting on paired donors, with incorporation or reduction of molecular oxygen; molecular_function GO:0020037; heme binding; molecular_function}	{NA}	{PF00067:Cytochrome P450}
i1_HQ_SD_c7941/f2p0/1939	BfCYP11249	{XP_017225579.1; PREDICTED: cytochrome P450 CYP71D313-like [Daucus carota subsp. sativus]}	{sp|H2DH20|C7D13_PANGI; Cytochrome P450 CYP71D313 OS=Panax ginseng OX=4054 PE=2 SV=1}	{jcu:105633070; - - - - -}	{At3g26300; KOG0156 Cytochrome P450 CYP2 suBfCYPamily Q Secondary metabolites biosynthesis, transport and catabolism ;}	{GO:0020037; heme binding; molecular_function GO:0016705; oxidoreductase activity, acting on paired donors, with incorporation or reduction of molecular oxygen; molecular_function GO:0055114; oxidation-reduction process; biological_process GO:0005506; iron ion binding; molecular_function}	{XM_007020491.2; PREDICTED: Theobroma cacao cytochrome P450 71D10 (LOC18593321), mRNA}	{PF00067:Cytochrome P450}
i1_HQ_SD_c9670/f3p1/1787	BfCYP11451	{XP_017258861.1; PREDICTED: cytochrome P450 CYP736A12-like [Daucus carota subsp. sativus]}	{sp|H2DH18|C7A12_PANGI; Cytochrome P450 CYP736A12 OS=Panax ginseng OX=4054 PE=2 SV=1}	{pxb:103938668; - - - - -}	{At4g36220; KOG0156 Cytochrome P450 CYP2 suBfCYPamily Q Secondary metabolites biosynthesis, transport and catabolism ;}	{GO:0020037; heme binding; molecular_function GO:0016705; oxidoreductase activity, acting on paired donors, with incorporation or reduction of molecular oxygen; molecular_function GO:0055114; oxidation-reduction process; biological_process GO:0005506; iron ion binding; molecular_function}	{XM_017383529.1; PREDICTED: Daucus carota subsp. sativus cytochrome P450 CYP736A12-like (LOC108211832), mRNA}	{PF00067:Cytochrome P450}
i1_HQ_SD_c9979/f2p8/1710	BfCYP11474	{XP_017225579.1; PREDICTED: cytochrome P450 CYP71D313-like [Daucus carota subsp. sativus]}	{sp|H2DH20|C7D13_PANGI; Cytochrome P450 CYP71D313 OS=Panax ginseng OX=4054 PE=2 SV=1}	{jcu:105633070; - - - - -}	{At3g26300; KOG0156 Cytochrome P450 CYP2 suBfCYPamily Q Secondary metabolites biosynthesis, transport and catabolism ;}	{GO:0005506; iron ion binding; molecular_function GO:0055114; oxidation-reduction process; biological_process GO:0016705; oxidoreductase activity, acting on paired donors, with incorporation or reduction of molecular oxygen; molecular_function GO:0020037; heme binding; molecular_function}	{XM_007020491.2; PREDICTED: Theobroma cacao cytochrome P450 71D10 (LOC18593321), mRNA}	{PF00067:Cytochrome P450}
i1_LQ_SD_c10039/f1p1/1766	BfCYP11494	{XP_017258861.1; PREDICTED: cytochrome P450 CYP736A12-like [Daucus carota subsp. sativus]}	{sp|H2DH18|C7A12_PANGI; Cytochrome P450 CYP736A12 OS=Panax ginseng OX=4054 PE=2 SV=1}	{pxb:103938668; - - - - -}	{At3g26310; KOG0156 Cytochrome P450 CYP2 suBfCYPamily Q Secondary metabolites biosynthesis, transport and catabolism ;}	{GO:0020037; heme binding; molecular_function GO:0055114; oxidation-reduction process; biological_process GO:0005506; iron ion binding; molecular_function GO:0016705; oxidoreductase activity, acting on paired donors, with incorporation or reduction of molecular oxygen; molecular_function}	{NA}	{PF00067:Cytochrome P450}
i1_LQ_SD_c10067/f2p0/1854	BfCYP11503	{XP_017237604.1; PREDICTED: cytochrome P450 90A1 [Daucus carota subsp. sativus]}	{sp|Q42569|C90A1_ARATH; Cytochrome P450 90A1 OS=Arabidopsis thaliana OX=3702 GN=CYP90A1 PE=2 SV=1}	{nta:107791859; - - - - -}	{At5g05690; KOG0157 Cytochrome P450 CYP4/CYP19/CYP26 subfamilies QI Secondary metabolites biosynthesis, transport and catabolism ; Lipid transport and metabolism ;}	{GO:0055114; oxidation-reduction process; biological_process GO:0005506; iron ion binding; molecular_function GO:0016705; oxidoreductase activity, acting on paired donors, with incorporation or reduction of molecular oxygen; molecular_function GO:0020037; heme binding; molecular_function}	{XM_017382115.1; PREDICTED: Daucus carota subsp. sativus cytochrome P450 90A1 (LOC108210725), mRNA}	{PF00067:Cytochrome P450}
i1_LQ_SD_c10080/f1p0/1933	BfCYP11509	{XP_017250231.1; PREDICTED: cytochrome P450 734A1-like [Daucus carota subsp. sativus]}	{sp|O48786|C734A_ARATH; Cytochrome P450 734A1 OS=Arabidopsis thaliana OX=3702 GN=CYP734A1 PE=2 SV=1}	{vvi:100245678; K15639 CYP734A1, BAS1 PHYB activation tagged suppressor 1 1.14.-.- ko00905; Metabolism; Metabolism of terpenoids and polyketides; Brassinosteroid biosynthesis}	{At2g26710; KOG0157 Cytochrome P450 CYP4/CYP19/CYP26 subfamilies QI Secondary metabolites biosynthesis, transport and catabolism ; Lipid transport and metabolism ;}	{GO:0016705; oxidoreductase activity, acting on paired donors, with incorporation or reduction of molecular oxygen; molecular_function GO:0055114; oxidation-reduction process; biological_process GO:0005506; iron ion binding; molecular_function GO:0020037; heme binding; molecular_function}	{XM_017394742.1; PREDICTED: Daucus carota subsp. sativus cytochrome P450 734A1-like (LOC108220862), mRNA}	{PF00067:Cytochrome P450}
i1_LQ_SD_c10483/f1p0/1836	BfCYP11642	{KZM94332.1; hypothetical protein DCAR_017575 [Daucus carota subsp. sativus]}	{sp|H2DH21|C7A29_PANGI; Cytochrome P450 CYP72A219 OS=Panax ginseng OX=4054 PE=2 SV=1}	{cam:101500476; - - - - -}	{At3g14690; KOG0157 Cytochrome P450 CYP4/CYP19/CYP26 subfamilies QI Secondary metabolites biosynthesis, transport and catabolism ; Lipid transport and metabolism ;}	{GO:0020037; heme binding; molecular_function GO:0016705; oxidoreductase activity, acting on paired donors, with incorporation or reduction of molecular oxygen; molecular_function GO:0055114; oxidation-reduction process; biological_process GO:0005506; iron ion binding; molecular_function}	{XM_017396100.1; PREDICTED: Daucus carota subsp. sativus cytochrome P450 CYP72A219-like (LOC108222195), mRNA}	{PF00067:Cytochrome P450}
i1_LQ_SD_c10700/f1p6/1882	BfCYP11721	{XP_017253202.1; PREDICTED: cytochrome P450 CYP72A219-like [Daucus carota subsp. sativus]}	{sp|H2DH21|C7A29_PANGI; Cytochrome P450 CYP72A219 OS=Panax ginseng OX=4054 PE=2 SV=1}	{cam:101500476; - - - - -}	{At3g14690; KOG0157 Cytochrome P450 CYP4/CYP19/CYP26 suBfCYPamilies QI Secondary metabolites biosynthesis, transport and catabolism ; Lipid transport and metabolism ;}	{GO:0020037; heme binding; molecular_function GO:0016705; oxidoreductase activity, acting on paired donors, with incorporation or reduction of molecular oxygen; molecular_function GO:0055114; oxidation-reduction process; biological_process GO:0005506; iron ion binding; molecular_function}	{XM_017397713.1; PREDICTED: Daucus carota subsp. sativus cytochrome P450 CYP72A219-like (LOC108223441), mRNA}	{PF00067:Cytochrome P450}
i1_LQ_SD_c10806/f1p4/1587	BfCYP11753	{XP_017238332.1; PREDICTED: cytochrome P450 CYP71D312-like [Daucus carota subsp. sativus]}	{sp|H2DH19|C7D31_PANGI; Cytochrome P450 CYP71D312 OS=Panax ginseng OX=4054 PE=2 SV=1}	{nta:107782895; - - - - -}	{At3g26210; KOG0156 Cytochrome P450 CYP2 suBfCYPamily Q Secondary metabolites biosynthesis, transport and catabolism ;}	{GO:0016705; oxidoreductase activity, acting on paired donors, with incorporation or reduction of molecular oxygen; molecular_function GO:0055114; oxidation-reduction process; biological_process GO:0005506; iron ion binding; molecular_function GO:0020037; heme binding; molecular_function}	{XM_017382843.1; PREDICTED: Daucus carota subsp. sativus cytochrome P450 CYP71D312-like (LOC108211282), mRNA}	{PF00067:Cytochrome P450}
i1_LQ_SD_c10920/f1p0/1816	BfCYP11799	{XP_017229161.1; PREDICTED: cytochrome P450 71B34-like [Daucus carota subsp. sativus]}	{sp|Q9LIP5|C71BW_ARATH; Cytochrome P450 71B35 OS=Arabidopsis thaliana OX=3702 GN=CYP71B35 PE=2 SV=1}	{vvi:100245779; - - - - -}	{At3g26310; KOG0156 Cytochrome P450 CYP2 subfamily Q Secondary metabolites biosynthesis, transport and catabolism ;}	{GO:0020037; heme binding; molecular_function GO:0005506; iron ion binding; molecular_function GO:0055114; oxidation-reduction process; biological_process GO:0016705; oxidoreductase activity, acting on paired donors, with incorporation or reduction of molecular oxygen; molecular_function}	{XM_017373673.1; PREDICTED: Daucus carota subsp. sativus cytochrome P450 71B34-like (LOC108204304), transcript variant X2, mRNA}	{PF00067:Cytochrome P450}
i1_LQ_SD_c10947/f1p0/1687	BfCYP11808	{XP_017245569.1; PREDICTED: cytochrome P450 76A2-like [Daucus carota subsp. sativus]}	{sp|P37122|C76A2_SOLME; Cytochrome P450 76A2 OS=Solanum melongena OX=4111 GN=CYP76A2 PE=2 SV=1}	{rcu:8274891; K20618 CYP76A cytochrome P450 family 76 subfamily A - -}	{At3g52970; KOG0156 Cytochrome P450 CYP2 subfamily Q Secondary metabolites biosynthesis, transport and catabolism ;}	{GO:0016705; oxidoreductase activity, acting on paired donors, with incorporation or reduction of molecular oxygen; molecular_function GO:0055114; oxidation-reduction process; biological_process GO:0005506; iron ion binding; molecular_function GO:0020037; heme binding; molecular_function}	{XM_017389979.1; PREDICTED: Daucus carota subsp. sativus cytochrome P450 76A1-like (LOC108217130), mRNA}	{PF00067:Cytochrome P450}
i1_LQ_SD_c11284/f1p0/1958	BfCYP11922	{XP_017238684.1; PREDICTED: cytochrome P450 78A7-like [Daucus carota subsp. sativus]}	{sp|Q9FIB0|C78A7_ARATH; Cytochrome P450 78A7 OS=Arabidopsis thaliana OX=3702 GN=CYP78A7 PE=2 SV=1}	{jcu:105636540; K20619 CYP78A cytochrome P450 family 78 subfamily A - -}	{At5g09970; KOG0156 Cytochrome P450 CYP2 subfamily Q Secondary metabolites biosynthesis, transport and catabolism ;}	{GO:0020037; heme binding; molecular_function GO:0016705; oxidoreductase activity, acting on paired donors, with incorporation or reduction of molecular oxygen; molecular_function GO:0005506; iron ion binding; molecular_function GO:0055114; oxidation-reduction process; biological_process}	{XM_017383195.1; PREDICTED: Daucus carota subsp. sativus cytochrome P450 78A7-like (LOC108211562), mRNA}	{PF00067:Cytochrome P450}
i1_LQ_SD_c11959/f1p13/1697	BfCYP12138	{AAS90126.1; cytochrome P450 [Ammi majus]}	{sp|Q9SZ46|C82C4_ARATH; Cytochrome P450 82C4 OS=Arabidopsis thaliana OX=3702 GN=CYP82C4 PE=2 SV=1}	{cic:CICLE_v10028201mg; - - - - -}	{At4g31940; KOG0156 Cytochrome P450 CYP2 subfamily Q Secondary metabolites biosynthesis, transport and catabolism ;}	{GO:0020037; heme binding; molecular_function GO:0016705; oxidoreductase activity, acting on paired donors, with incorporation or reduction of molecular oxygen; molecular_function GO:0055114; oxidation-reduction process; biological_process GO:0005506; iron ion binding; molecular_function}	{AY532373.1; Ammi majus cytochrome P450 (CYP82H1) mRNA, complete cds}	{PF00067:Cytochrome P450}
i1_LQ_SD_c12081/f1p2/1865	BfCYP12175	{XP_017221758.1; PREDICTED: cytochrome P450 76A1-like [Daucus carota subsp. sativus]}	{sp|P37122|C76A2_SOLME; Cytochrome P450 76A2 OS=Solanum melongena OX=4111 GN=CYP76A2 PE=2 SV=1}	{nta:107775167; - - - - -}	{At3g52970; KOG0156 Cytochrome P450 CYP2 subfamily Q Secondary metabolites biosynthesis, transport and catabolism ;}	{GO:0016705; oxidoreductase activity, acting on paired donors, with incorporation or reduction of molecular oxygen; molecular_function GO:0005506; iron ion binding; molecular_function GO:0055114; oxidation-reduction process; biological_process GO:0020037; heme binding; molecular_function}	{XM_017364974.1; PREDICTED: Daucus carota subsp. sativus cytochrome P450 76A2-like (LOC108197376), mRNA}	{PF00067:Cytochrome P450}
i1_LQ_SD_c12242/f1p0/1821	BfCYP12234	{XP_017225579.1; PREDICTED: cytochrome P450 CYP71D313-like [Daucus carota subsp. sativus]}	{sp|H2DH20|C7D13_PANGI; Cytochrome P450 CYP71D313 OS=Panax ginseng OX=4054 PE=2 SV=1}	{jcu:105633070; - - - - -}	{At3g26300; KOG0156 Cytochrome P450 CYP2 suBfCYPamily Q Secondary metabolites biosynthesis, transport and catabolism ;}	{GO:0020037; heme binding; molecular_function GO:0005506; iron ion binding; molecular_function GO:0055114; oxidation-reduction process; biological_process GO:0016705; oxidoreductase activity, acting on paired donors, with incorporation or reduction of molecular oxygen; molecular_function}	{XM_007020491.2; PREDICTED: Theobroma cacao cytochrome P450 71D10 (LOC18593321), mRNA}	{PF00067:Cytochrome P450}
i1_LQ_SD_c12302/f1p2/2000	BfCYP12254	{XP_017248169.1; PREDICTED: cytochrome P450 CYP72A219-like [Daucus carota subsp. sativus]}	{sp|H2DH21|C7A29_PANGI; Cytochrome P450 CYP72A219 OS=Panax ginseng OX=4054 PE=2 SV=1}	{pxb:103947629; - - - - -}	{At3g14690; KOG0157 Cytochrome P450 CYP4/CYP19/CYP26 suBfCYPamilies QI Secondary metabolites biosynthesis, transport and catabolism ; Lipid transport and metabolism ;}	{GO:0055114; oxidation-reduction process; biological_process GO:0005506; iron ion binding; molecular_function GO:0016705; oxidoreductase activity, acting on paired donors, with incorporation or reduction of molecular oxygen; molecular_function GO:0020037; heme binding; molecular_function GO:0005887; integral to plasma membrane; cellular_component}	{XM_017390921.1; PREDICTED: Daucus carota subsp. sativus cytochrome P450 CYP72A219-like (LOC108217999), mRNA}	{PF00067:Cytochrome P450 PF06305:Protein of unknown function (DUF1049)}
i1_LQ_SD_c12329/f1p7/1891	BfCYP12265	{XP_017222253.1; PREDICTED: alkane hydroxylase MAH1-like [Daucus carota subsp. sativus]}	{sp|Q9FMY1|C86B1_ARATH; Cytochrome P450 86B1 OS=Arabidopsis thaliana OX=3702 GN=CYP86B1 PE=2 SV=1}	{sot:102606192; - - - - -}	{At4g39480; KOG0157 Cytochrome P450 CYP4/CYP19/CYP26 subfamilies QI Secondary metabolites biosynthesis, transport and catabolism ; Lipid transport and metabolism ;}	{GO:0008233; peptidase activity; molecular_function GO:0006465; signal peptide processing; biological_process GO:0005787; signal peptidase complex; cellular_component GO:0016705; oxidoreductase activity, acting on paired donors, with incorporation or reduction of molecular oxygen; molecular_function GO:0016021; integral to membrane; cellular_component GO:0020037; heme binding; molecular_function …	{XM_017383185.1; PREDICTED: Daucus carota subsp. sativus alkane hydroxylase MAH1-like (LOC108211553), mRNA}	{PF00067:Cytochrome P450 PF06703:Microsomal signal peptidase 25 kDa subunit (SPC25)}
i1_LQ_SD_c12608/f1p10/1863	BfCYP12362	{XP_017233252.1; PREDICTED: cytochrome P450 CYP749A22-like [Daucus carota subsp. sativus]}	{sp|H2DH17|C7A22_PANGI; Cytochrome P450 CYP749A22 OS=Panax ginseng OX=4054 PE=2 SV=1}	{pxb:108867237; K15639 CYP734A1, BAS1 PHYB activation tagged suppressor 1 1.14.-.- ko00905; Metabolism; Metabolism of terpenoids and polyketides; Brassinosteroid biosynthesis}	{At3g14690; KOG0157 Cytochrome P450 CYP4/CYP19/CYP26 suBfCYPamilies QI Secondary metabolites biosynthesis, transport and catabolism ; Lipid transport and metabolism ;}	{GO:0020037; heme binding; molecular_function GO:0016705; oxidoreductase activity, acting on paired donors, with incorporation or reduction of molecular oxygen; molecular_function GO:0055114; oxidation-reduction process; biological_process GO:0005506; iron ion binding; molecular_function}	{NA}	{PF00067:Cytochrome P450}
i1_LQ_SD_c12891/f1p0/1958	BfCYP12453	{XP_017220414.1; PREDICTED: cytochrome P450 78A5-like [Daucus carota subsp. sativus]}	{sp|Q9LMX7|C78A5_ARATH; Cytochrome P450 78A5 OS=Arabidopsis thaliana OX=3702 GN=CYP78A5 PE=2 SV=1}	{pop:POPTR_0003s17200g; - - - - -}	{At1g13710; KOG0156 Cytochrome P450 CYP2 subfamily Q Secondary metabolites biosynthesis, transport and catabolism ;}	{GO:0055114; oxidation-reduction process; biological_process GO:0005506; iron ion binding; molecular_function GO:0016705; oxidoreductase activity, acting on paired donors, with incorporation or reduction of molecular oxygen; molecular_function GO:0020037; heme binding; molecular_function}	{XM_017364925.1; PREDICTED: Daucus carota subsp. sativus cytochrome P450 78A5-like (LOC108197340), mRNA}	{PF00067:Cytochrome P450}
i1_LQ_SD_c12923/f1p0/1879	BfCYP12467	{XP_017221758.1; PREDICTED: cytochrome P450 76A1-like [Daucus carota subsp. sativus]}	{sp|P37122|C76A2_SOLME; Cytochrome P450 76A2 OS=Solanum melongena OX=4111 GN=CYP76A2 PE=2 SV=1}	{nta:107775167; - - - - -}	{At2g45570; KOG0156 Cytochrome P450 CYP2 subfamily Q Secondary metabolites biosynthesis, transport and catabolism ;}	{GO:0055114; oxidation-reduction process; biological_process GO:0005506; iron ion binding; molecular_function GO:0016705; oxidoreductase activity, acting on paired donors, with incorporation or reduction of molecular oxygen; molecular_function GO:0020037; heme binding; molecular_function}	{XM_017366268.1; PREDICTED: Daucus carota subsp. sativus cytochrome P450 76A2-like (LOC108198514), mRNA}	{PF00067:Cytochrome P450}
i1_LQ_SD_c13397/f1p3/1910	BfCYP12615	{XP_017215730.1; PREDICTED: cytochrome P450 CYP749A22-like isoform X2 [Daucus carota subsp. sativus]}	{sp|H2DH17|C7A22_PANGI; Cytochrome P450 CYP749A22 OS=Panax ginseng OX=4054 PE=2 SV=1}	{sind:105156471; - - - - -}	{At2g26710; KOG0157 Cytochrome P450 CYP4/CYP19/CYP26 suBfCYPamilies QI Secondary metabolites biosynthesis, transport and catabolism ; Lipid transport and metabolism ;}	{GO:0020037; heme binding; molecular_function GO:0005506; iron ion binding; molecular_function GO:0055114; oxidation-reduction process; biological_process GO:0016705; oxidoreductase activity, acting on paired donors, with incorporation or reduction of molecular oxygen; molecular_function}	{XM_017360241.1; PREDICTED: Daucus carota subsp. sativus cytochrome P450 CYP749A22-like (LOC108193538), transcript variant X2, mRNA}	{PF00067:Cytochrome P450}
i1_LQ_SD_c13559/f1p1/1900	BfCYP12666	{XP_017237635.1; PREDICTED: cytochrome P450 94A1-like [Daucus carota subsp. sativus]}	{sp|P98188|C94A2_VICSA; Cytochrome P450 94A2 OS=Vicia sativa OX=3908 GN=CYP94A2 PE=2 SV=1}	{nta:107767536; - - - - -}	{At5g63450; KOG0157 Cytochrome P450 CYP4/CYP19/CYP26 subfamilies QI Secondary metabolites biosynthesis, transport and catabolism ; Lipid transport and metabolism ;}	{GO:0055114; oxidation-reduction process; biological_process GO:0005506; iron ion binding; molecular_function GO:0016705; oxidoreductase activity, acting on paired donors, with incorporation or reduction of molecular oxygen; molecular_function GO:0020037; heme binding; molecular_function}	{XM_017393321.1; PREDICTED: Daucus carota subsp. sativus cytochrome P450 94A2-like (LOC108219800), mRNA}	{PF00067:Cytochrome P450}
i1_LQ_SD_c13594/f1p2/1681	BfCYP12675	{XP_017258861.1; PREDICTED: cytochrome P450 CYP736A12-like [Daucus carota subsp. sativus]}	{sp|H2DH18|C7A12_PANGI; Cytochrome P450 CYP736A12 OS=Panax ginseng OX=4054 PE=2 SV=1}	{pxb:103938668; - - - - -}	{At3g26310; KOG0156 Cytochrome P450 CYP2 suBfCYPamily Q Secondary metabolites biosynthesis, transport and catabolism ;}	{GO:0020037; heme binding; molecular_function GO:0055114; oxidation-reduction process; biological_process GO:0005506; iron ion binding; molecular_function GO:0016705; oxidoreductase activity, acting on paired donors, with incorporation or reduction of molecular oxygen; molecular_function}	{XM_017403372.1; PREDICTED: Daucus carota subsp. sativus cytochrome P450 CYP736A12-like (LOC108227961), mRNA}	{PF00067:Cytochrome P450}
i1_LQ_SD_c13780/f1p27/1954	BfCYP12734	{XP_017238332.1; PREDICTED: cytochrome P450 CYP71D312-like [Daucus carota subsp. sativus]}	{sp|H2DH20|C7D13_PANGI; Cytochrome P450 CYP71D313 OS=Panax ginseng OX=4054 PE=2 SV=1}	{jcu:105633070; - - - - -}	{At5g25140; KOG0156 Cytochrome P450 CYP2 suBfCYPamily Q Secondary metabolites biosynthesis, transport and catabolism ;}	{GO:0003785; actin monomer binding; molecular_function GO:0016705; oxidoreductase activity, acting on paired donors, with incorporation or reduction of molecular oxygen; molecular_function GO:0005506; iron ion binding; molecular_function GO:0055114; oxidation-reduction process; biological_process GO:0007015; actin filament organization; biological_process GO:0020037; heme binding; molecular_funct…	{XM_017382843.1; PREDICTED: Daucus carota subsp. sativus cytochrome P450 CYP71D312-like (LOC108211282), mRNA}	{PF00067:Cytochrome P450 PF01290:Thymosin beta-4 family}
i1_LQ_SD_c14280/f1p11/1235	BfCYP12888	{XP_017223623.1; PREDICTED: cytochrome P450 CYP736A12-like [Daucus carota subsp. sativus]}	{sp|H2DH18|C7A12_PANGI; Cytochrome P450 CYP736A12 OS=Panax ginseng OX=4054 PE=2 SV=1}	{pxb:103929706; - - - - -}	{At2g30750; KOG0156 Cytochrome P450 CYP2 suBfCYPamily Q Secondary metabolites biosynthesis, transport and catabolism ;}	{GO:0020037; heme binding; molecular_function GO:0005506; iron ion binding; molecular_function GO:0055114; oxidation-reduction process; biological_process GO:0016705; oxidoreductase activity, acting on paired donors, with incorporation or reduction of molecular oxygen; molecular_function}	{NA}	{PF00067:Cytochrome P450}
i1_LQ_SD_c14370/f1p0/1861	BfCYP12918	{XP_017248204.1; PREDICTED: cytochrome P450 CYP72A219-like [Daucus carota subsp. sativus]}	{sp|H2DH21|C7A29_PANGI; Cytochrome P450 CYP72A219 OS=Panax ginseng OX=4054 PE=2 SV=1}	{cam:101500476; - - - - -}	{At3g14610; KOG0157 Cytochrome P450 CYP4/CYP19/CYP26 suBfCYPamilies QI Secondary metabolites biosynthesis, transport and catabolism ; Lipid transport and metabolism ;}	{GO:0016705; oxidoreductase activity, acting on paired donors, with incorporation or reduction of molecular oxygen; molecular_function GO:0055114; oxidation-reduction process; biological_process GO:0005506; iron ion binding; molecular_function GO:0020037; heme binding; molecular_function}	{XM_017392715.1; PREDICTED: Daucus carota subsp. sativus cytochrome P450 CYP72A219-like (LOC108219329), mRNA}	{PF00067:Cytochrome P450}
i1_LQ_SD_c15775/f1p2/1071	BfCYP13332	{XP_010108148.1; Flavonoid 3'-monooxygenase [Morus notabilis]}	{sp|F4JW83|C84A4_ARATH; Cytochrome P450 84A4 OS=Arabidopsis thaliana OX=3702 GN=CYP84A4 PE=1 SV=1}	{pop:POPTR_0001s07860g; - - - - -}	{At4g12300; KOG0156 Cytochrome P450 CYP2 subfamily Q Secondary metabolites biosynthesis, transport and catabolism ;}	{GO:0020037; heme binding; molecular_function GO:0005506; iron ion binding; molecular_function GO:0055114; oxidation-reduction process; biological_process GO:0016705; oxidoreductase activity, acting on paired donors, with incorporation or reduction of molecular oxygen; molecular_function}	{NA}	{PF00067:Cytochrome P450}
i1_LQ_SD_c18144/f2p1/1736	BfCYP13518	{XP_017245569.1; PREDICTED: cytochrome P450 76A2-like [Daucus carota subsp. sativus]}	{sp|P37122|C76A2_SOLME; Cytochrome P450 76A2 OS=Solanum melongena OX=4111 GN=CYP76A2 PE=2 SV=1}	{rcu:8274891; K20618 CYP76A cytochrome P450 family 76 subfamily A - -}	{At3g52970; KOG0156 Cytochrome P450 CYP2 subfamily Q Secondary metabolites biosynthesis, transport and catabolism ;}	{GO:0020037; heme binding; molecular_function GO:0055114; oxidation-reduction process; biological_process GO:0005506; iron ion binding; molecular_function GO:0016705; oxidoreductase activity, acting on paired donors, with incorporation or reduction of molecular oxygen; molecular_function}	{NA}	{PF00067:Cytochrome P450}
i1_LQ_SD_c18231/f1p1/1773	BfCYP13549	{XP_017224895.1; PREDICTED: cytochrome P450 89A2-like [Daucus carota subsp. sativus]}	{sp|Q42602|C89A2_ARATH; Cytochrome P450 89A2 OS=Arabidopsis thaliana OX=3702 GN=CYP89A2 PE=2 SV=2}	{spen:107014567; - - - - -}	{At2g12190; KOG0156 Cytochrome P450 CYP2 subfamily Q Secondary metabolites biosynthesis, transport and catabolism ;}	{GO:0006355; regulation of transcription, DNA-dependent; biological_process GO:0005506; iron ion binding; molecular_function GO:0055114; oxidation-reduction process; biological_process GO:0016705; oxidoreductase activity, acting on paired donors, with incorporation or reduction of molecular oxygen; molecular_function GO:0020037; heme binding; molecular_function GO:0043401; steroid hormone mediate…	{XM_017402206.1; PREDICTED: Daucus carota subsp. sativus cytochrome P450 89A2-like (LOC108227180), mRNA}	{PF00067:Cytochrome P450 PF00104:Ligand-binding domain of nuclear hormone receptor}
i1_LQ_SD_c18546/f1p0/1757	BfCYP13671	{XP_017248170.1; PREDICTED: cytochrome P450 CYP72A219-like [Daucus carota subsp. sativus]}	{sp|H2DH21|C7A29_PANGI; Cytochrome P450 CYP72A219 OS=Panax ginseng OX=4054 PE=2 SV=1}	{cam:101500476; - - - - -}	{At3g14620; KOG0157 Cytochrome P450 CYP4/CYP19/CYP26 suBfCYPamilies QI Secondary metabolites biosynthesis, transport and catabolism ; Lipid transport and metabolism ;}	{GO:0016705; oxidoreductase activity, acting on paired donors, with incorporation or reduction of molecular oxygen; molecular_function GO:0005506; iron ion binding; molecular_function GO:0055114; oxidation-reduction process; biological_process GO:0018024; histone-lysine N-methyltransferase activity; molecular_function GO:0020037; heme binding; molecular_function}	{XM_017392682.1; PREDICTED: Daucus carota subsp. sativus cytochrome P450 CYP72A219-like (LOC108219315), mRNA}	{PF00067:Cytochrome P450 PF10440:Ubiquitin-binding WIYLD domain}
i1_LQ_SD_c18571/f1p0/1864	BfCYP13683	{XP_017238905.1; PREDICTED: cytochrome P450 81E8-like [Daucus carota subsp. sativus]}	{sp|Q6WNQ8|C81E8_MEDTR; Cytochrome P450 81E8 OS=Medicago truncatula OX=3880 GN=CYP81E8 PE=2 SV=1}	{pop:POPTR_0002s12300g; - - - - -}	{At4g37370; KOG0156 Cytochrome P450 CYP2 subfamily Q Secondary metabolites biosynthesis, transport and catabolism ;}	{GO:0005506; iron ion binding; molecular_function GO:0055114; oxidation-reduction process; biological_process GO:0016705; oxidoreductase activity, acting on paired donors, with incorporation or reduction of molecular oxygen; molecular_function GO:0020037; heme binding; molecular_function}	{XM_017383416.1; PREDICTED: Daucus carota subsp. sativus cytochrome P450 81E8-like (LOC108211738), mRNA}	{PF00067:Cytochrome P450}
i1_LQ_SD_c18879/f1p1/1859	BfCYP13810	{XP_016176742.1; PREDICTED: cytochrome P450 87A3-like [Arachis ipaensis]}	{sp|Q8L7D5|THAH_ARATH; Cytochrome P450 708A2 OS=Arabidopsis thaliana OX=3702 GN=CYP708A2 PE=2 SV=3}	{aip:107619015; - - - - -}	{At5g48000; KOG0157 Cytochrome P450 CYP4/CYP19/CYP26 subfamilies QI Secondary metabolites biosynthesis, transport and catabolism ; Lipid transport and metabolism ;}	{GO:0016705; oxidoreductase activity, acting on paired donors, with incorporation or reduction of molecular oxygen; molecular_function GO:0005506; iron ion binding; molecular_function GO:0055114; oxidation-reduction process; biological_process GO:0020037; heme binding; molecular_function GO:0007009; plasma membrane organization; biological_process}	{NA}	{PF00067:Cytochrome P450 PF08397:IRSp53/MIM homology domain}
i1_LQ_SD_c18944/f1p2/1693	BfCYP13837	{XP_017232783.1; PREDICTED: cytochrome P450 71A9-like [Daucus carota subsp. sativus]}	{sp|O81970|C71A9_SOYBN; Cytochrome P450 71A9 OS=Glycine max OX=3847 GN=CYP71A9 PE=2 SV=1}	{sind:105157480; K20617 CYP71A cytochrome P450 family 71 subfamily A - -}	{At1g13080; KOG0156 Cytochrome P450 CYP2 subfamily Q Secondary metabolites biosynthesis, transport and catabolism ;}	{GO:0016705; oxidoreductase activity, acting on paired donors, with incorporation or reduction of molecular oxygen; molecular_function GO:0005506; iron ion binding; molecular_function GO:0055114; oxidation-reduction process; biological_process GO:0020037; heme binding; molecular_function}	{XM_017376994.1; PREDICTED: Daucus carota subsp. sativus cytochrome P450 71A9-like (LOC108206627), mRNA}	{PF00067:Cytochrome P450}
i1_LQ_SD_c19296/f1p5/1848	BfCYP13964	{AFK79031.1; cytochrome P450 CYP736A54 [Bupleurum chinense]}	{sp|H2DH18|C7A12_PANGI; Cytochrome P450 CYP736A12 OS=Panax ginseng OX=4054 PE=2 SV=1}	{ini:109177814; K20562 CYP736A biphenyl-4-hydroxylase - -}	{At3g26300; KOG0156 Cytochrome P450 CYP2 suBfCYPamily Q Secondary metabolites biosynthesis, transport and catabolism ;}	{GO:0020037; heme binding; molecular_function GO:0005634; nucleus; cellular_component GO:0005506; iron ion binding; molecular_function GO:0055114; oxidation-reduction process; biological_process GO:0003677; DNA binding; molecular_function GO:0009725; response to hormone stimulus; biological_process GO:0006355; regulation of transcription, DNA-dependent; biological_process GO:0016705; oxidoreducta…	{JF803815.1; Bupleurum chinense cytochrome P450 CYP736A54 mRNA, complete cds}	{PF06507:Auxin response factor PF00067:Cytochrome P450}
i1_LQ_SD_c19327/f1p1/1769	BfCYP13978	{XP_017255162.1; PREDICTED: cytochrome P450 CYP736A12-like [Daucus carota subsp. sativus]}	{sp|H2DH18|C7A12_PANGI; Cytochrome P450 CYP736A12 OS=Panax ginseng OX=4054 PE=2 SV=1}	{pxb:103938668; - - - - -}	{At3g26310; KOG0156 Cytochrome P450 CYP2 suBfCYPamily Q Secondary metabolites biosynthesis, transport and catabolism ;}	{GO:0016705; oxidoreductase activity, acting on paired donors, with incorporation or reduction of molecular oxygen; molecular_function GO:0055114; oxidation-reduction process; biological_process GO:0005506; iron ion binding; molecular_function GO:0020037; heme binding; molecular_function}	{XM_017399673.1; PREDICTED: Daucus carota subsp. sativus cytochrome P450 CYP736A12-like (LOC108224913), mRNA}	{PF00067:Cytochrome P450}
[truncated: 598 more rows]

## Sheet: Table. S2
Table S2. Primer sequences used for qRT-PCR validation
Gene name	Primer
BfAACT21654	F (5'-3')	AGCATTGGGGGCAGGTTTAC
	R (5'-3')	TTTCCATACCACCAGCCACA
BfHMGR35352	F (5'-3')	CTTCTTCTCCGTCGCTTAC
	R (5'-3')	TGAAGGAGGCGATGAGA
BfDXS34808	F (5'-3')	AGCAAGTATCTTTACCCACG
	R (5'-3')	CCTGGCATACTCGTCTACT
BfHDS30580	F (5'-3')	TCTCCGAGGGGAATGGTTGA
	R (5'-3')	ACCATGACAACTGGGTTGCT
BfBAS49741	F (5'-3')	CTATGAGACAGCCACGAC
	R (5'-3')	AGTATTCAGATGTCCCGTA
BfBAS50159	F (5'-3')	AAAGCCTCGCAGGTGAA
	R (5'-3')	TCTGAAACTTGCCATCCA
[truncated: 8 more rows]

## Sheet: Table. S3
Table S3. FPKM values of DEGs in MEmagenta module involved in the saikosaponin biosynthesis
[truncated: 132 more rows]

[truncated: 2 more sheets: Table. S4, Table. S5]
